# Supplementary material for: Enhanced single RNA imaging reveals dynamic gene expression in live animals
Source: eLife. 2023 Mar 3;12:e82178. doi: 10.7554/eLife.82178 (PMC10032653; doi:10.7554/eLife.82178)
Supplement: Figure 1—source data 1. [file elife-82178-fig1-data1.xlsx]

## Sheet: Fig 1D Fig 1-supplement 1C
smFISH-3 repeats
ch1:smFISH	ch2:MASS
First-REPEAT									Second-REPEAT									Third-REPEAT
	Particles_in_Ch1	Particles_in_Ch2	Colocalized_ch1&ch2	%_Ch1_coloc_ch1&ch2	%_Ch2_coloc_ch1&ch2					Particles_in_Ch1	Particles_in_Ch2	Colocalized_ch1&ch2	%_Ch1_coloc_ch1&ch2	%_Ch2_coloc_ch1&ch2					Particles_in_Ch1	Particles_in_Ch2	Colocalized_ch1&ch2	%_Ch1_coloc_ch1&ch2	%_Ch2_coloc_ch1&ch2
cell 9-crop 2	148	168	102	68.919	60.714				100ng-cell-2 crop1	451	399	323	71.619	80.952				cell-3-crop1	631	699	496	78.605	70.959
cell 9-crop 3	106	119	90	84.906	75.63				100ng-cell-2 crop2	707	633	506	71.57	79.937				cell-3-crop2	556	618	428	76.978	69.256
cell 9-crop 4	42	37	27	64.286	72.973				100ng-cell-2 crop3	612	574	464	75.817	80.836				cell-3-crop3	350	294	229	65.429	77.891
cell 9-crop 5	862	920	628	72.854	68.261				100ng-cell-2 crop4	281	284	217	77.224	76.408				cell-3-crop4	457	501	356	77.899	71.058
cell 9-crop 6	730	753	556	76.164	73.838					2051	1890		74.0575	79.5333					1994	2112		74.7278	72.291
cell 9-crop 7	275	316	199	72.364	62.975
cell 9-crop 8	206	207	132	64.078	63.768					Particles_in_Ch1	Particles_in_Ch2	Colocalized_ch1&ch2	%_Ch1_coloc_ch1&ch2	%_Ch2_coloc_ch1&ch2					Particles_in_Ch1	Particles_in_Ch2	Colocalized_ch1&ch2	%_Ch1_coloc_ch1&ch2	%_Ch2_coloc_ch1&ch2
cell 9-crop 9	267	311	202	75.655	64.952				350ng-cell-1 crop1	888	1273	779	87.725	61.194				cell-5-crop1	404	330	262	64.851	79.394
cell 9-crop 10	424	619	347	81.84	56.058				350ng-cell-1 crop2	549	570	434	79.053	76.14				cell-5-crop2	855	894	573	67.018	64.094
	3060	3450		73.4518	66.5743				350ng-cell-1 crop3	205	208	161	78.537	77.404					1259	1224		65.9345	71.744
									350ng-cell-1 crop4	126	135	93	73.81	68.889
	Particles_in_Ch1	Particles_in_Ch2	Colocalized_ch1&ch2	%_Ch1_coloc_ch1&ch2	%_Ch2_coloc_ch1&ch2				350ng-cell-1 crop5	260	302	210	80.769	69.536					Particles_in_Ch1	Particles_in_Ch2	Colocalized_ch1&ch2	%_Ch1_coloc_ch1&ch2	%_Ch2_coloc_ch1&ch2
cell-15-crop-1	517	525	364	70.406	69.333				350ng-cell-1 crop6	299	355	258	86.288	72.676				cell-8-crop1	265	296	213	80.377	71.959
cell-15-crop-2	353	319	221	62.606	69.279				350ng-cell-1 crop7	525	604	425	80.952	70.364				cell-8-crop2	458	487	344	75.109	70.637
cell-15-crop-3	385	347	243	63.117	70.029					2852	3447		81.0191	70.8861				cell-8-crop3	409	461	317	77.506	68.764
cell-15-crop-4	825	766	544	65.939	71.018													cell-8-crop4	400	409	296	74	72.372
cell-15-crop-5	97	121	77	79.381	63.636					Particles_in_Ch1	Particles_in_Ch2	Colocalized_ch1&ch2	%_Ch1_coloc_ch1&ch2	%_Ch2_coloc_ch1&ch2				cell-8-crop5	87	94	70	80.46	74.468
	2177	2078		68.2898	68.659				350ng-cell-5 crop1	366	343	253	69.126	73.761				cell-8-crop6	343	376	268	78.134	71.277
									350ng-cell-5 crop2	370	370	274	74.054	74.054					1962	2123		77.5977	71.5795
	Particles_in_Ch1	Particles_in_Ch2	Colocalized_ch1&ch2	%_Ch1_coloc_ch1&ch2	%_Ch2_coloc_ch1&ch2				350ng-cell-5 crop3	60	61	40	66.667	65.574
cell-19-crop-1	492	517	345	70.122	66.731				350ng-cell-5 crop4	297	303	213	71.717	70.297
cell-19-crop-2	264	292	184	69.697	63.014				350ng-cell-5 crop5	93	108	67	72.043	62.037
cell-19-crop-3	409	488	304	74.328	62.295					1186	1185		70.7214	69.1446				Third-all
cell-19-crop-4	396	383	278	70.202	72.585														Particles_in_Ch1	Particles_in_Ch2	Colocalized_ch1&ch2	%_Ch1_coloc_ch1&ch2	%_Ch2_coloc_ch1&ch2
	1561	1680		71.0873	66.1562					Particles_in_Ch1	Particles_in_Ch2	Colocalized_ch1&ch2	%_Ch1_coloc_ch1&ch2	%_Ch2_coloc_ch1&ch2				3-crop1	631	699	496	78.605	70.959
									700ng-cell-2-crop1	522	431	364	69.732	84.455				3-crop2	556	618	428	76.978	69.256
									700ng-cell-2-crop2	203	187	145	71.429	77.54				3-crop3	350	294	229	65.429	77.891
									700ng-cell-2-crop3	141	136	102	72.34	75				3-crop4	457	501	356	77.899	71.058
First-ALL									700ng-cell-2-crop4	63	58	44	69.841	75.862				5-crop1	404	330	262	64.851	79.394
									700ng-cell-2-crop5	128	97	76	59.375	78.351				5-crop2	855	894	573	67.018	64.094
	Particles_in_Ch1	Particles_in_Ch2	Colocalized_ch1&ch2	%_Ch1_coloc_ch1&ch2	%_Ch2_coloc_ch1&ch2				700ng-cell-2-crop6	196	160	128	65.306	80				8-crop1	265	296	213	80.377	71.959
cell 9-crop 2	148	168	102	68.919	60.714				700ng-cell-2-crop7	91	83	68	74.725	81.928				8-crop2	458	487	344	75.109	70.637
cell 9-crop 3	106	119	90	84.906	75.63				700ng-cell-2-crop8	84	74	60	71.429	81.081				8-crop3	409	461	317	77.506	68.764
cell 9-crop 4	42	37	27	64.286	72.973				700ng-cell-2-crop9	78	78	59	75.641	75.641				8-crop4	400	409	296	74	72.372
cell 9-crop 5	862	920	628	72.854	68.261					1506	1304		69.3862	78.8105				8-crop5	87	94	70	80.46	74.468
cell 9-crop 6	730	753	556	76.164	73.838													8-crop6	343	376	268	78.134	71.277
cell 9-crop 7	275	316	199	72.364	62.975					Particles_in_Ch1	Particles_in_Ch2	Colocalized_ch1&ch2	%_Ch1_coloc_ch1&ch2	%_Ch2_coloc_ch1&ch2
cell 9-crop 8	206	207	132	64.078	63.768				700ng-cell-3-crop1	764	678	551	72.12	81.268
cell 9-crop 9	267	311	202	75.655	64.952				700ng-cell-3-crop2	625	583	466	74.56	79.931
cell 9-crop 10	424	619	347	81.84	56.058				700ng-cell-3-crop3	133	116	91	68.421	78.448
15-crop-1	517	525	364	70.406	69.333				700ng-cell-3-crop4	177	158	120	67.797	75.949
15-crop-2	353	319	221	62.606	69.279				700ng-cell-3-crop5	53	55	41	77.358	74.545
15-crop-3	385	347	243	63.117	70.029				700ng-cell-3-crop6	80	81	63	78.75	77.778
15-crop-4	825	766	544	65.939	71.018				700ng-cell-3-crop7	41	35	26	63.415	74.286
15-crop-5	97	121	77	79.381	63.636					1873	1706		71.7744	77.4579
19-crop-1	492	517	345	70.122	66.731
19-crop-2	264	292	184	69.697	63.014
19-crop-3	409	488	304	74.328	62.295					Particles_in_Ch1	Particles_in_Ch2	Colocalized_ch1&ch2	%_Ch1_coloc_ch1&ch2	%_Ch2_coloc_ch1&ch2
19-crop-4	396	383	278	70.202	72.585				700ng-cell-4-crop1	154	141	106	68.831	75.177
									700ng-cell-4-crop2	422	391	293	69.431	74.936
									700ng-cell-4-crop3	560	435	358	63.929	82.299
									700ng-cell-4-crop4	526	479	312	59.316	65.136
									700ng-cell-4-crop5	72	70	49	68.056	70
										1734	1516		65.9126	73.5096
										Particles_in_Ch1	Particles_in_Ch2	Colocalized_ch1&ch2	%_Ch1_coloc_ch1&ch2	%_Ch2_coloc_ch1&ch2
									700ng-cell-5-crop1	343	336	249	72.595	74.107
									700ng-cell-5-crop2	230	216	178	77.391	82.407
									700ng-cell-5-crop3	138	134	103	74.638	76.866
									700ng-cell-5-crop4	135	125	101	74.815	80.8
									700ng-cell-5-crop5	110	105	80	72.727	76.19
									700ng-cell-5-crop6	44	52	35	79.545	67.308
									700ng-cell-5-crop7	316	278	212	67.089	76.259
									700ng-cell-5-crop8	201	200	148	73.632	74
									700ng-cell-5-crop9	89	92	61	68.539	66.304
									700ng-cell-5-crop10	32	29	21	65.625	72.414
									700ng-cell-5-crop11	61	64	44	72.131	68.75
										1699	1631
										Particles_in_Ch1	Particles_in_Ch2	Colocalized_ch1&ch2	%_Ch1_coloc_ch1&ch2	%_Ch2_coloc_ch1&ch2
									700ng-cell-10-2 cells-crop1	367	466	299	81.471	64.163
									700ng-cell-10-2 cells-crop2	301	277	230	76.412	83.032
									700ng-cell-10-2 cells-crop3	94	101	69	73.404	68.317
									700ng-cell-10-2 cells-crop4	157	184	127	80.892	69.022
									700ng-cell-10-2 cells-crop5	415	405	297	71.566	73.333
									700ng-cell-10-2 cells-crop6	366	375	284	77.596	75.733
									700ng-cell-10-2 cells-crop7	337	366	278	82.493	75.956
										2037	2174
										Particles_in_Ch1	Particles_in_Ch2	Colocalized_ch1&ch2	%_Ch1_coloc_ch1&ch2	%_Ch2_coloc_ch1&ch2
									700ng-cell-12-crop1	1579	1441	998	63.205	69.257
									700ng-cell-12-crop2	941	792	583	61.955	73.611
									700ng-cell-12-crop3	274	384	170	62.044	44.271
										2794	2617
									Second-ALL
										Particles_in_Ch1	Particles_in_Ch2	Colocalized_ch1&ch2	%_Ch1_coloc_ch1&ch2	%_Ch2_coloc_ch1&ch2
									100ng-2 crop1	451	399	323	71.619	80.952
									100ng-2 crop2	707	633	506	71.57	79.937
									100ng-2 crop3	612	574	464	75.817	80.836
									100ng-2 crop4	281	284	217	77.224	76.408
									350ng-1 crop1	888	1273	779	87.725	61.194
									350ng-1 crop2	549	570	434	79.053	76.14
									350ng-1 crop3	205	208	161	78.537	77.404
									350ng-1 crop4	126	135	93	73.81	68.889
									350ng-1 crop5	260	302	210	80.769	69.536
									350ng-1 crop6	299	355	258	86.288	72.676
									350ng-1 crop7	525	604	425	80.952	70.364
									350ng-5 crop1	366	343	253	69.126	73.761
									350ng-5 crop2	370	370	274	74.054	74.054
									350ng-5 crop3	60	61	40	66.667	65.574
									350ng-5 crop4	297	303	213	71.717	70.297
									350ng-5 crop5	93	108	67	72.043	62.037
									700ng-2-crop1	522	431	364	69.732	84.455
									700ng-2-crop2	203	187	145	71.429	77.54
									700ng-2-crop3	141	136	102	72.34	75
									700ng-2-crop4	63	58	44	69.841	75.862
									700ng-2-crop5	128	97	76	59.375	78.351
									700ng-2-crop6	196	160	128	65.306	80
									700ng-2-crop7	91	83	68	74.725	81.928
									700ng-2-crop8	84	74	60	71.429	81.081
									700ng-2-crop9	78	78	59	75.641	75.641
									700ng-3-crop1	764	678	551	72.12	81.268
									700ng-3-crop2	625	583	466	74.56	79.931
									700ng-3-crop3	133	116	91	68.421	78.448
									700ng-3-crop4	177	158	120	67.797	75.949
									700ng-3-crop5	53	55	41	77.358	74.545
									700ng-3-crop6	80	81	63	78.75	77.778
									700ng-3-crop7	41	35	26	63.415	74.286
									700ng-4-crop1	154	141	106	68.831	75.177
									700ng-4-crop2	422	391	293	69.431	74.936
									700ng-4-crop3	560	435	358	63.929	82.299
									700ng-4-crop4	526	479	312	59.316	65.136
									700ng-4-crop5	72	70	49	68.056	70
									700ng-5-crop1	343	336	249	72.595	74.107
									700ng-5-crop2	230	216	178	77.391	82.407
									700ng-5-crop3	138	134	103	74.638	76.866
									700ng-5-crop4	135	125	101	74.815	80.8
									700ng-5-crop5	110	105	80	72.727	76.19
									700ng-5-crop6	44	52	35	79.545	67.308
									700ng-5-crop7	316	278	212	67.089	76.259
									700ng-5-crop8	201	200	148	73.632	74
									700ng-5-crop9	89	92	61	68.539	66.304
									700ng-5-crop10	32	29	21	65.625	72.414
									700ng-5-crop11	61	64	44	72.131	68.75
									700ng-10-2 cells-crop1	367	466	299	81.471	64.163
									700ng-10-2 cells-crop2	301	277	230	76.412	83.032
									700ng-10-2 cells-crop3	94	101	69	73.404	68.317
									700ng-10-2 cells-crop4	157	184	127	80.892	69.022
									700ng-10-2 cells-crop5	415	405	297	71.566	73.333
									700ng-10-2 cells-crop6	366	375	284	77.596	75.733
									700ng-10-2 cells-crop7	337	366	278	82.493	75.956
									700ng-12-crop1	1579	1441	998	63.205	69.257
									700ng-12-crop2	941	792	583	61.955	73.611
									700ng-12-crop3	274	384	170	62.044	44.271

## Sheet: Fig 1-supplement 2C
qPCR-3 genes-3 repeats
C-MYC					HSPA1A					KIF18B
	First	Second	Third			First	Second	Third			First	Second	Third
201-0h	1.001	1.002	1.003		203-0h	1	1.002	1.001		205-0h	1.00787	1.00076	1.00236
201-3h	0.393	0.546	0.572		203-3h	0.123	1.379	0.78		205-3h	0.588535	0.15504	0.53371
202-6h	0.397	0.349	0.333		203-6h	0.129	0.561	0.238		205-6h	0.269318	0.0182958	0.407194
202-0h	1.002	1.001	1.004		204-0h	1	1.005	1.002		206-0h	1.00571	1.0048	1.03446
202-3h	1.017	0.453	0.554		204-3h	0.58	0.832	0.253		206-3h	0.314407	0.0462594	0.33274
202-6h	0.476	0.259	0.184		204-6h	0.103	0.585	0.323		206-6h	0.19057	0.00646804	0.306897
202+MASS-0h	1.009	1.001	1.002		204+MASS-0h	1.012	1.003	1.001		206+MASS-0h	1.01517	1.00654	1.00073
202+MASS-3h	0.535	0.353	0.412		204+MASS-3h	0.605	0.704	0.774		206+MASS-3h	0.424193	0.464593	0.453108
202+MASS-6h	0.215	0.265	0.277		204+MASS-6h	0.155	0.382	1.213		206+MASS-6h	0.260907	0.0878679	0.315597
201: C-MYC-3'UTR					203: HSPA1A-3'UTR					205: KIF18B-3'UTR
202: C-MYC-3'UTR-8xMS2					204: HSPA1A-3'UTR-8xMS2					206: KIF18B-3'UTR-8xMS2
202+MASS: C-MYC-3'UTR-8xMS2+tdMCP-24xSuntag+sfGFP					204+MASS: HSPA1A-3'UTR-8xMS2+tdMCP-24xSuntag+sfGFP					206+MASS: KIF18B-3'UTR-8xMS2+tdMCP-24xSuntag+sfGFP

## Sheet: Fig 1-supplement 4 6-24xMS2-1
1-1 cell-mean intensity	1-Max intensity	1-SNR	2-2 cells-mean intensity	2-Max-intensity	2-SNR	3-1 cell-mean intensity	3-Max-intensity	3-SNR	4-1 cell-mean intensity	4-Max-intensity	4-SNR	5-1 cell-mean intensity	5-Max-intensity	5-SNR	6-1 cell-mean intensity	6-Max-intensity	6-SNR	7-1 cells-mean intensity	7-Max-intensity	7-SNR	8-2 cells-mean intensity	8-Max-intensity	8-SNR	9-2 cells-mean intensity	9-Max-intensity	9-SNR	10-1 cell-mean intensity	10-Max-intensity	10-SNR			ALL cells	mean intensity	Max-intensity	SNR
131.164	165	0.756717	119	144	1.04021	159.902	246	1.50628	156.623	216	1.21813	120.639	158	0.703189	129.377	183	0.652259	160.525	208	1.30091	173.869	223	1.3602	174.541	224	1.95849	132.508	160	1.44214				110.508	140	0.175724
132.016	168	0.847146	119.623	147	0.94243	151.443	200	1.3246	158.213	218	0.853198	120.459	154	0.873554	129.164	174	0.672166	176.115	219	1.6012	144.328	189	0.893767	160.869	216	1.51079	154.803	220	1.57367				114.049	142	0.226552
132.197	164	0.700997	120.344	155	0.734514	152.967	198	1.71394	164	216	0.770766	137.951	174	0.894479	123.984	160	1.0789	154.213	198	1.22273	164.689	227	0.848125	144.541	183	1.22967	135.066	167	1.26834				115.639	142	0.243496
132.541	182	0.824565	120.459	145	0.685548	158.344	237	1.53681	159.033	196	1.23977	181.033	291	1.60474	125.246	168	0.746831	163.344	215	1.43547	167.344	211	1.30466	132.115	178	0.837066	146.902	203	1.54482				116.361	143	0.253571
132.656	162	0.62627	120.934	157	0.630439	152.246	217	1.4568	165.148	206	0.857064	161.443	205	1.68079	118.459	147	0.791756	132.295	169	1.13093	148.59	187	0.994121	136.459	172	0.9646	153.869	199	1.54627				116.361	143	0.258609
133.377	164	0.870278	121.246	145	0.667663	154.311	208	2.01081	145.721	185	0.614039	142.295	185	1.11527	121.115	161	0.892914	148.672	192	1.29098	151.377	189	0.776371	148.918	194	1.44382	151.066	201	1.51696				117.459	144	0.302595
134.377	176	0.623153	121.721	151	0.776211	153.82	220	1.42811	172.18	213	0.685951	147.066	192	0.923177	124.41	162	0.716813	168.148	231	1.60539	143.623	181	0.645044	139.508	175	1.17438	141.344	178	1.47828				117.869	144	0.318587
134.82	165	0.674125	121.787	156	0.644605	147.475	204	1.32599	159.803	224	0.842437	158.016	192	1.35255	128.443	166	1.05845	153.41	198	1.65924	140.393	168	0.791075	147.852	209	1.41308	143.459	180	1.63634				118.459	144	0.319221
135.459	169	0.755969	122.262	158	1.15166	149.361	192	1.58485	162.59	213	0.571894	160.672	227	1.09432	121.984	162	1.149	133.754	178	1.02539	141.574	174	0.995264	157.246	198	1.73414	158.262	231	1.83756				118.459	144	0.322228
135.77	165	0.826297	122.443	153	0.733944	155.492	243	1.42849	163.984	209	0.664597	162.213	229	1.35807	136.016	175	1.07189	139.344	182	1.07304	170.705	211	1.20392	152.459	204	1.38282	147.951	190	2.1205				118.541	145	0.328477
136.869	164	0.430652	122.721	148	0.869651	141.033	184	1.40369	160.984	196	0.416205	134.18	164	0.601267	135.459	175	1.0401	141.377	178	0.777656	166.115	224	1.0084	134.328	177	1.05407	141.016	174	1.60231				118.934	145	0.33879
137.23	176	0.900114	122.787	158	0.572688	148.508	193	1.69015	149.23	206	0.775203	159.803	199	1.3699	128.77	160	0.961609	167.213	223	1.10406	165.295	228	1.53812	143.344	186	1.65418	140.295	172	1.79676				119	145	0.347634
137.656	200	0.944016	122.967	158	0.921861	163.41	231	1.97029	167.016	220	0.873419	162.311	214	1.60422	133.967	190	1.044	150.918	185	1.27565	171.869	231	0.880829	154.164	192	1.86719	131.951	181	1.18875				119.016	145	0.353041
137.689	187	0.911127	123.18	162	0.91177	160.984	218	1.71832	178.115	225	0.943987	154.393	197	1.04513	128.295	168	0.979411	146.639	185	1.1797	132.23	170	1.00431	140.951	187	1.27167	160.279	220	1.7029				119.164	145	0.355374
137.902	182	1.09692	123.328	174	0.471154	148.426	200	1.59096	159.656	201	1.07673	136.984	170	0.743284	120.344	161	0.833915	163.623	204	1.56909	131.361	174	0.85138	139.098	187	0.958733	139.131	169	1.27563				119.623	145	0.363994
137.951	171	1.00284	123.787	163	1.03194	157.344	197	1.8361	168.492	202	0.838168	138.082	183	0.883118	121.984	165	0.746806	168.41	211	1.36364	139.803	181	0.672851	149.869	188	1.09377	141.885	192	1.51567				119.918	146	0.367909
138.852	169	0.970547	123.82	147	1.10633	158.705	238	1.58766	167.967	207	0.66257	138.557	176	0.742603	132.131	196	0.799048	148.902	187	1.24103	130.246	156	0.855587	138.148	179	0.639189	164.279	230	1.7405				120.131	146	0.370221
139.262	181	0.959329	124.148	164	0.919831	141.803	201	1.41783	165.623	207	0.543836	147.885	184	0.788599	130.377	169	1.02338	164.803	215	1.8004	142.574	173	0.83623	147.852	194	1.31525	141.492	176	1.18898				120.262	146	0.372437
139.738	171	0.575239	124.213	154	1.08695	165.426	225	1.60554	157.197	214	0.631921	145.164	190	1.00876	119.164	159	0.567424	161.984	208	1.37333	139.016	175	0.82578	135	168	0.773632	138.869	168	0.927954				120.279	147	0.377998
140.18	184	0.960808	124.262	152	0.768255	158.361	218	1.59695	174.787	231	0.728552	156.967	186	1.65186	121.689	152	0.993217	149.656	188	1.20103	135.902	184	0.74337	153.115	191	1.80854	142.77	180	1.53679				120.344	147	0.379094
140.41	171	0.964014	124.361	169	0.72557	148.557	186	1.52714	189.836	247	1.28472	136.869	169	0.84391	130.443	161	1.07217	167.541	229	1.84349	165.705	234	1.21907	141.557	180	0.886716	162.525	213	1.80678				120.344	147	0.386421
140.639	181	0.939493	124.361	191	0.603406	157.869	200	1.9809	152.984	197	0.829438	141.246	177	1.08085	129.918	157	1.03632	163.557	228	1.09695	149.492	181	0.931731	145.098	188	1.05067	161.705	223	1.88725				120.459	147	0.390874
141.541	176	0.635469	124.393	159	0.687251	146.574	185	1.41521	167.82	243	0.379094	137.574	171	0.760875	124.066	171	0.846906	163.377	228	1.62694	137.689	179	0.752877	142.246	201	0.877604	159.328	202	2.23244				120.459	147	0.392888
141.803	186	0.628755	124.393	162	0.630133	160.656	214	1.9548	186.049	238	0.511909	141.885	177	0.885811	131.967	185	1.36244	167.295	235	1.87285	144.098	192	1.18723	153.557	199	1.58137	135.344	168	0.740789				120.459	147	0.393902
142.295	180	1.01356	124.426	167	0.580236	145.607	192	1.40553	165.361	220	0.554084	142.738	176	0.862538	130.803	172	0.865858	174.852	229	2.03563	153.393	195	1.49468	143.393	199	1.43533	145.393	192	1.29197				120.541	148	0.396574
142.607	190	0.729851	124.705	151	0.767622	160.295	202	1.70529	206.967	263	1.2743	150.59	182	0.707716	131.016	173	1.08165	158.475	224	1.37833	133.934	175	0.679894	147.443	187	1.27086	141.852	179	1.05183				120.639	148	0.39718
143.508	175	1.31109	124.754	168	0.783766	140.82	197	1.36426	183.066	251	0.637692	152.557	181	0.854305	126.508	161	0.941723	146.705	180	0.857672	150.377	192	1.27578	137.344	181	0.960736	138.016	177	0.906891				120.836	148	0.399345
143.639	190	0.693683	124.836	161	0.732376	156.639	208	1.75296	161.738	213	0.501047	144.754	196	0.896888	128.59	154	0.906854	167.639	221	1.48098	145.426	178	1.26416	140.623	189	1.20909	136.377	180	1.23751				120.934	148	0.411127
143.902	189	0.809631	124.951	159	0.817998	153.115	214	1.46572	191.557	236	0.916995	147.016	179	1.15657	136.361	176	1.2818	145.41	173	1.21183	141.393	189	1.05096	172.623	207	1.95245	143.23	183	1.39172				121	148	0.416205
144.082	193	1.16162	125	191	0.665175	169.213	231	1.92724	188.066	218	0.924828	175.361	243	1.88278	129.246	192	0.922399	151.967	198	1.31532	148.279	202	0.971348	147.164	191	1.24665	158.607	227	1.45004				121.016	148	0.417205
144.475	186	0.695879	125.016	166	0.906128	160.262	217	1.63328	194.902	246	0.782251	144.508	179	0.89111	128.689	167	0.955803	146.574	190	1.00392	146.262	193	1.37206	135.852	170	0.801424	139.459	183	1.24418				121.016	148	0.417219
144.623	205	0.846943	125.049	170	0.772641	154.262	207	1.63357	199.803	245	0.702379	159.246	205	1.80919	131.377	172	1.00554	152.344	197	1.08844	133.426	173	1.04158	151.295	199	1.48042	153.902	202	1.55047				121.115	148	0.427075
144.689	169	0.840579	125.197	155	0.694189	151.197	198	1.44751	188.361	245	0.811099	157.115	195	1.45397	130.557	165	1.07312	143.23	173	1.03039	140.344	192	0.737204	134.967	171	0.950136	155.016	206	1.55685				121.246	149	0.427924
145.148	210	1.55949	125.23	163	0.608188	155.18	204	1.64171	243.393	323	1.79424	129.246	158	0.67594	139.918	187	1.06335	164.508	219	1.5598	143.738	181	1.11012	163.049	234	1.60639	151.344	191	1.83859				121.295	149	0.429815
145.197	180	1.09017	125.246	158	0.832698	169.033	216	1.9258	192.721	253	0.9471	150.902	233	1.2563	136.426	164	1.06017	148.328	188	1.33095	136.328	171	1.0614	153.787	203	1.53821	137.115	186	1.08556				121.426	149	0.430652
145.23	181	0.928082	125.393	152	0.775759	160.328	208	1.56661	191.246	254	0.475361	151.361	197	1.34166	121.902	160	0.668854	148.541	186	1.5412	150.623	219	0.804612	147.344	183	1.09432	141.557	185	1.3746				121.525	149	0.435954
145.279	189	1.04296	125.41	163	0.99279	159.18	214	1.57312	200.869	275	1.18423	159.852	196	1.30292	126.361	176	0.683283	155.459	198	1.68436	150.443	189	1.03203	142.164	174	1.40857	142.639	201	1.05878				121.574	149	0.437434
145.787	187	1.64625	125.639	158	1.32485	164.361	214	1.69957	195.115	264	0.957658	154.951	199	1.76002	125.984	163	0.715156	148.738	177	1.45004	164.508	228	1.40867	135.197	180	0.821059	153.049	226	1.2802				121.574	149	0.441215
145.787	188	0.879958	125.852	158	0.738863	178.082	242	2.11535	189.328	262	0.756555	136.115	161	0.886567	148.066	194	1.81387	154.164	191	1.12525	150.262	206	1.44419	129	155	0.846948	153.049	200	1.24515				121.623	150	0.442852
145.852	189	0.955235	125.967	161	0.781276	170.721	248	1.59849	192.934	230	0.702475	130.393	160	0.923808	144.984	187	1.74311	147.689	182	1.02235	154.016	199	0.706648	140.164	183	1.018	148.41	193	1.38065				121.689	150	0.448021
146	192	0.998551	125.984	165	0.485855	155.82	220	1.47515	203.115	258	1.1167	137.115	170	0.975484	138.852	176	0.807289	163.639	211	1.62098	159.016	206	1.41812	132.656	168	1.30119	149.787	191	1.04612				121.721	150	0.449893
146.361	174	0.841532	126.23	177	0.892874	149.18	214	1.47086	181.557	233	0.543086	140.656	178	0.58838	138.033	182	0.583336	135.639	178	1.06604	148.574	183	1.24246	142.967	189	0.860889	147.082	188	1.01827				121.787	150	0.449932
146.525	183	1.35177	126.328	163	0.662988	186.902	240	2.08778	178.82	224	0.558635	148.344	192	1.30977	128.984	175	0.719657	149.803	185	1.612	153.918	193	1.50672	148.344	197	1.19304	145.77	205	1.36546				121.787	150	0.45324
146.623	188	0.779372	126.459	148	1.06608	142.295	187	1.24914	202.311	256	1.02278	141.656	178	0.903077	122.82	160	0.796268	148.131	192	0.860024	136.59	184	0.916747	133.689	168	0.842874	145.475	186	1.28717				121.836	150	0.453288
146.721	188	0.518048	126.574	151	1.3111	164.443	213	1.95378	178.689	226	0.493006	166.098	208	1.77435	129.82	153	0.678559	161.033	209	1.3568	141.082	178	1.35102	152.902	231	1.37823	153.016	183	1.56891				121.902	150	0.454801
146.852	183	1.01938	126.59	160	0.941882	169.672	224	1.71353	181.721	236	0.855481	163.59	203	1.48237	129.131	163	0.817177	161.443	205	1.51321	132.213	186	0.731007	151.787	197	0.989561	141.115	175	1.41343				121.984	150	0.458903
146.902	184	1.33917	126.607	170	0.417205	165.311	223	1.67653	190.787	238	0.785924	146.541	179	1.33893	130.918	173	0.946419	146.738	182	0.838451	132.623	163	1.04574	145.721	188	1.23287	160.41	205	1.76183				121.984	150	0.462437
147	178	1.52137	126.607	151	0.913405	154.902	221	1.31692	184.377	238	0.514986	132.131	167	0.737656	130.148	165	0.905147	168.557	216	1.39841	179.705	225	1.60819	135.525	176	1.19224	159.459	217	1.32279				122	151	0.463429
147.016	182	0.813275	126.656	162	1.12056	160.902	224	1.46524	158.311	197	0.577524	170.344	208	1.70277	137.41	189	0.859366	166.295	230	1.09136	165.311	214	1.55297	150.623	216	0.989132	140.984	174	1.14049				122.148	151	0.464253
147.131	186	0.780746	126.672	159	0.846647	184.656	237	1.86516	181.262	222	0.75641	153.951	192	0.795211	131.672	213	0.884071	163.508	219	1.27584	152.148	217	1.79563	155.59	195	1.08213	152.967	194	1.76452				122.164	151	0.465261
147.393	188	0.784955	126.754	164	0.814583	179.541	244	1.76321	185.426	239	0.644128	131.295	163	0.841264	128.426	163	0.94184	157.557	210	1.14616	147.869	192	1.00005	144.344	178	1.61132	137.426	179	1.06834				122.246	151	0.469362
147.754	186	0.672568	126.77	157	0.929424	188.426	266	1.7851	183.574	224	0.56208	152.459	187	1.22403	126.279	158	0.799503	153.41	183	0.954327	135.361	170	0.746596	141.016	180	1.58271	151.426	207	1.63526				122.262	151	0.469971
148.574	186	0.805837	126.984	172	0.984032	188.672	304	1.79622	184.328	233	0.974271	168.197	234	1.79573	136.574	177	1.05516	170.033	252	1.45944	156.082	207	1.43906	149.393	186	1.21819	145.377	185	1.36285				122.393	151	0.470941
149.049	184	2.27091	127.049	165	0.878732	157.475	209	1.83415	194.18	260	0.568306	151.213	196	1.23333	136.59	176	1.12233	159.049	218	1.0475	167.607	218	1.46427	152.836	193	1.51716	177.623	244	2.07173				122.41	151	0.471154
149.246	200	1.27181	127.18	167	0.839571	167.836	220	1.81774	175.246	210	0.702515	146.361	177	1.26588	137.82	179	1.68583	167.082	214	1.50759	136	192	0.810887	152.213	197	1.61926	139.115	185	1.32171				122.443	151	0.475361
149.377	182	0.972165	127.262	148	0.696016	174.344	236	2.02239	178.607	238	0.722568	144.41	177	0.828166	131.574	174	0.947964	151.492	198	0.973622	133.869	180	0.90273	142	195	1.24099	154.607	197	1.4315				122.475	152	0.476463
149.852	208	0.319221	127.361	164	0.813814	149.148	192	1.28919	185.721	250	1.21377	146.672	179	1.43259	128.23	176	0.792974	185.967	237	1.88413	136.705	174	0.860111	159.705	220	1.2182	139.787	167	1.36919				122.475	152	0.480241
149.934	175	1.14509	127.525	162	0.947403	169.672	244	1.42379	178.918	210	0.973807	138.213	177	0.848411	124.607	157	0.91318	151.721	180	1.18798	132.852	185	0.944327	153.77	202	0.86247	151.164	195	1.55895				122.492	152	0.480603
150.115	206	1.02434	127.656	169	0.880465	161.639	213	1.7219	180	241	0.894367	138.984	175	0.598855	130.131	162	1.13371	156.066	199	1.62972	141.574	176	0.846603	151.623	197	1.13055	145.262	198	1.49249				122.639	152	0.481393
150.164	180	0.904373	127.689	165	1.049	163.164	199	1.78369	171.803	224	0.74852	153.279	192	0.639712	131.82	161	1.03996	160.951	220	1.17771	154.262	192	1.0971	176.951	233	1.65793	138.984	176	1.08282				122.721	152	0.484228
150.295	180	0.958805	127.721	173	0.992362	155.738	194	1.8691	149.459	186	0.83805	150.295	193	0.615907	127.098	152	0.76073	180.262	227	1.56175	147.098	177	0.722879	159.328	205	1.2716	137.705	169	1.62665				122.754	152	0.485312
150.541	201	0.764007	127.77	152	0.820303	168.607	251	1.51926	175.197	213	0.646093	154.607	228	0.710083	133.738	171	0.954218	152.131	205	1.06962	142.475	172	0.892692	159.164	232	0.934252	147.967	180	1.44929				122.787	152	0.485855
150.721	189	1.18351	127.787	156	0.97255	161.787	205	1.83321	169.475	233	0.690561	157.148	202	1.50186	143.541	177	1.54186	164.689	226	1.40781	149.18	194	1.3088	162.852	232	0.977193	138.59	184	1.30241				122.787	152	0.492497
150.869	215	1.02996	128	167	0.972686	146.295	199	1.1332	172.246	214	0.761617	151.164	188	0.695531	150.377	189	1.6315	176.016	231	1.62158	143.016	175	1.31674	135.607	177	0.809598	149.902	203	1.7028				122.803	152	0.493006
150.934	185	1.09663	128.131	152	1.1356	159.197	212	1.68132	174.082	221	0.650441	150	180	0.653934	136.803	177	1.3465	176.41	242	1.60397	138	179	1.16078	146.197	199	0.62416	154.131	213	1.9952				122.82	152	0.494605
151.344	188	0.686359	128.148	171	0.699959	147.574	202	1.34835	159.295	207	1.38358	148.852	198	0.837017	132.508	160	1.27226	152.984	200	1.22819	163.426	210	1.63064	148.967	185	0.943043	140.689	187	1.1234				122.836	152	0.495162
151.59	188	1.62428	128.246	174	0.749145	168.328	243	1.35385	158.098	198	0.554875	146.984	182	0.848413	124.82	158	0.841912	175.852	236	1.33301	144.443	193	0.992147	145.787	200	1.33646	137.934	183	1.25613				122.918	152	0.49523
151.754	180	0.775403	128.262	174	0.792981	160.885	252	0.964566	156.787	198	1.19318	146.951	189	1.68742	145.574	200	1.20418	154.852	197	0.888671	160.738	202	1.02847	153.377	191	1.24377	144.492	186	1.44316				122.967	152	0.497353
151.951	182	1.14945	128.262	160	0.730807	165.492	217	1.84843	171.328	211	1.70837	147.016	182	1.35015	137.197	179	1.3116	157	191	1.00731	168.525	215	1.40097	151.967	179	1.13976	140.164	163	1.33562				123	152	0.498903
151.951	213	1.15111	128.279	157	0.797876	177.033	261	1.65956	168.098	210	0.974923	148.934	181	0.625394	131.967	165	1.28074	147.639	188	0.887464	171.098	237	1.62079	153.754	215	0.758683	138.852	173	0.835959				123.016	152	0.499698
152.016	191	1.24242	128.295	156	0.670866	161.18	219	1.70152	154.689	204	0.64778	164.689	228	1.45981	129.607	159	0.959357	173.443	248	1.44368	149.77	177	1.30801	151.672	197	1.2146	137.049	176	0.928466				123.033	152	0.501047
152.41	188	0.731079	128.311	173	0.871794	162.885	221	1.38666	132.295	171	0.622862	143.656	181	0.964324	126.393	150	0.884623	145.492	194	1.29449	143.246	175	1.8705	153.803	215	1.39361	132.033	171	1.09597				123.066	152	0.502951
153.689	202	1.36214	128.557	163	0.711431	153.262	212	1.24797	173.016	212	1.05156	141.656	181	0.328477	148.23	189	1.69913	149.623	187	1.24549	144.082	193	1.13444	136.41	178	0.616535	139.033	177	1.14116				123.098	152	0.504152
154.016	195	0.666126	128.574	168	1.07273	157.41	214	1.51556	151.607	194	0.716374	149.393	177	0.694958	124.18	152	0.6499	174.246	226	1.69424	159.328	204	1.80892	161.41	221	1.10419	157.164	221	1.54039				123.18	153	0.504639
154.082	198	1.21983	128.59	164	1.16106	151.393	205	1.65449	165.984	222	1.04939	159.869	201	1.06404	128.377	159	0.794856	182.164	245	1.6574	150.393	190	1.04171	154.934	207	0.914349	162.82	240	1.72758				123.197	153	0.505631
154.213	188	1.75964	128.869	163	1.01653	178.738	278	1.64528	153.197	193	0.703007	143.77	171	0.904881	126.885	171	0.767637	150.803	194	0.720385	137.508	189	0.972022	155.377	189	1.4289	145.541	192	1.36701				123.213	153	0.507057
154.541	192	0.893865	128.869	167	1.04655	172.852	243	2.02794	168.984	215	0.790199	140.541	172	0.752724	140.951	186	1.37937	159.18	210	1.11894	158.246	187	1.4172	181.689	222	1.82365	147.885	188	2.01521				123.279	153	0.510837
154.541	180	0.993625	129.082	159	1.02961	152.574	214	1.33943	181.705	227	1.01186	160.492	216	1.26097	143.672	187	1.11077	148.18	195	1.10972	188.672	236	1.64262	148.197	195	0.944841	163.951	233	1.73121				123.328	153	0.511909
154.639	199	0.883108	129.098	171	0.806144	143.049	187	1.55806	166.656	214	1.0768	142.328	169	0.779608	129.443	167	1.00196	181.803	263	1.33731	166.607	223	1.94077	145.639	206	0.894284	160.098	220	1.84672				123.344	153	0.514986
154.869	194	0.966734	129.098	170	1.35652	148.574	206	1.47681	178.639	218	1.05943	161.803	196	1.16232	177.852	231	1.96605	170.525	219	1.17387	143.59	179	0.850881	147.197	191	1.14011	147.918	205	1.31687				123.377	153	0.516736
154.902	185	0.969056	129.115	175	1.01088	146.066	188	1.99946	176.607	234	0.844284	149.738	188	0.83608	130.066	167	0.82522	140.754	176	0.929557	148.016	179	1.11924	139.656	181	0.989971	157	199	1.39389				123.426	153	0.517386
155.311	192	0.923773	129.213	177	0.886868	158.492	210	1.98863	171.951	204	1.15289	143.967	174	0.600023	126.508	152	1.16234	185.443	271	1.36847	151.328	216	1.13393	147	178	1.12073	139.279	197	1.05675				123.443	153	0.51789
155.344	205	1.22442	129.311	152	0.910334	150.197	232	1.52576	170.508	223	0.893938	153.656	229	0.947802	131.033	163	0.81591	166.475	212	1.79999	172.738	215	1.50029	165.689	237	1.55586	148.492	195	1.17249				123.508	153	0.518048
155.77	201	0.988401	129.41	161	1.23929	170.689	241	1.792	163.213	206	0.903572	155.607	197	1.21578	150.77	203	1.60661	142.098	182	0.985315	157.508	206	0.715102	162.754	216	1.15086	176.033	229	1.8973				123.508	153	0.518865
155.869	203	1.08517	129.426	170	0.769079	148.459	207	1.27159	166.41	206	0.816922	159.574	192	0.855459	151.459	184	1.22611	188.77	255	1.67696	140.869	181	0.953339	153.246	193	1.26898	137.459	166	1.0966				123.508	153	0.519071
156.262	190	1.72964	129.426	161	1.10886	144.082	192	1.32882	181.082	229	0.499698	151.541	220	0.986583	129.18	163	0.696096	160.639	197	1.01839	136.918	184	0.925947	148.115	185	1.0544	160.377	207	1.7736				123.525	154	0.519535
156.279	199	1.24686	129.607	171	0.897195	159.721	215	1.75637	190.016	248	1.39295	143.361	178	0.732951	165.197	210	1.53132	152.984	200	1.50315	184.098	235	1.6167	157.77	197	1.0594	158.18	199	1.71104				123.541	154	0.52169
156.41	191	1.20901	129.607	166	1.05987	154.672	233	1.79545	168.689	213	0.948864	169.754	217	1.51718	134.918	174	1.11811	142.049	180	1.45187	154.279	213	1.41356	143.934	179	0.820495	162.262	229	1.67418				123.623	154	0.52184
156.41	202	1.16787	129.656	174	0.919423	144.803	194	1.52233	168.803	227	1.1729	171.344	217	1.15555	145.508	205	1.20598	146.443	185	1.34173	153.902	205	1.06756	177.984	240	1.80407	167.803	258	1.47784				123.672	154	0.523037
156.639	197	0.675197	129.738	167	1.01012	154.738	225	1.27965	176.262	220	0.556089	133.721	166	0.516736	136.311	172	1.14339	149.77	191	1.31221	152.508	193	1.31181	149.541	203	1.2297	159.557	209	1.44199				123.738	154	0.523189
156.951	213	1.22548	129.77	163	0.964724	161.41	211	1.6848	158.689	207	0.837509	136.82	167	0.39718	138.295	187	1.23459	171.459	216	1.30601	145.393	192	0.714769	153.656	190	0.967537	142.016	192	1.25598				123.738	154	0.524644
157	197	0.442852	129.803	160	0.868848	171.82	216	1.97129	166.787	214	1.06461	138.459	175	0.899683	144.459	189	1.16864	162.41	202	1.33768	154.869	203	1.2069	164.967	210	1.35031	160.131	206	1.73758				123.787	154	0.524672
157.098	195	1.61641	129.803	178	0.839186	177.672	244	1.97882	163.738	210	0.809501	162.803	221	1.23762	127	163	0.884452	162.492	212	1.03348	147.148	214	1.06326	191.066	246	1.56015	147.656	209	1.24455				123.803	154	0.525374
157.148	204	1.33252	129.82	163	1.10388	157.459	226	1.48806	173.18	226	0.87889	157.148	221	1.12602	142.328	204	1.11943	204.639	312	1.86433	144.148	180	1.18343	138.361	184	0.850317	149.033	184	1.08447				123.82	154	0.52593
157.23	207	0.841293	129.902	155	1.05139	160.18	217	1.67837	164.689	209	1.39662	141.885	177	0.800521	130.295	163	0.804289	155.672	207	0.89336	147.049	185	0.973335	172.197	220	1.18202	158	214	1.02052				123.836	154	0.526609
157.869	189	1.09337	129.918	162	0.950824	158.246	215	1.33489	173.934	222	0.744226	133.656	185	0.566202	123.279	150	0.570418	180.623	261	1.67083	144.426	179	0.875399	175.41	226	1.4689	164.885	252	1.52208				123.869	154	0.527279
158	195	1.45885	130.066	173	0.729414	165.41	217	1.59383	161.328	208	0.902415	146.016	186	0.71888	132.836	173	0.992825	166.459	212	1.29457	171.115	220	1.67924	156.951	227	1.32569	157.869	195	0.908108				123.869	154	0.52796
158.016	215	1.41197	130.131	164	0.966666	177.885	244	1.5757	182.984	265	0.767941	145.918	178	0.899874	147.574	183	1.66341	167.984	245	1.27334	142.607	179	1.20161	160	208	1.4412	171.672	227	1.91711				123.869	155	0.529045
158.131	213	1.5404	130.131	163	0.55298	153.557	195	1.73764	180.115	229	1.22258	137.41	177	0.917525	129.951	159	0.935731	154.443	196	0.920106	140.803	181	1.26409	146.885	181	0.784309	173.295	224	1.23613				123.902	155	0.530394
158.574	190	0.634854	130.164	185	0.977787	156.18	203	1.5792	169.328	234	0.775772	151.393	204	0.899095	151.557	214	1.52463	156.639	199	1.2192	153.902	199	1.27484	145.131	181	1.13771	168.361	220	1.14715				123.984	155	0.53051
158.59	195	0.796072	130.213	177	0.998874	154.213	201	1.79775	172.607	221	0.592017	141.951	183	0.72622	141.787	187	1.17541	175.77	223	2.03212	145.525	193	0.738846	144.803	184	1.10977	181.492	235	1.76245				123.984	155	0.530616
158.705	203	0.786894	130.295	169	0.604251	149.115	219	1.06434	169.164	218	0.624807	142.361	177	0.901588	136.459	168	0.991365	149.328	195	1.16886	148.115	178	0.820405	162.033	212	1.62394	143.885	201	1.03153				124.016	155	0.533707
159.098	193	0.392888	130.311	168	0.891346	180.066	258	1.94718	155.639	196	0.888825	153.885	190	0.908033	150.361	196	1.78016	145.033	211	0.796051	141.82	210	1.13728	167.803	212	1.97941	146.197	186	1.36479				124.066	155	0.534208
159.115	203	1.59975	130.361	158	1.20224	184.016	221	1.6917	165.393	231	0.698856	159.049	208	1.38966	132.525	166	0.650654	145.557	186	1.45909	136.951	170	0.83757	140.459	172	1.21834	190.23	276	1.8441				124.098	155	0.536404
159.508	194	1.45077	130.443	161	0.750705	163.689	213	1.40005	168.148	224	0.846109	156.361	196	0.978993	121.836	145	0.803277	154.967	209	1.65788	165	237	1.83295	172.541	224	1.64231	151.59	186	1.1342				124.131	155	0.537457
159.639	211	1.07925	130.475	169	0.977923	180.295	223	1.50765	155.689	232	1.31873	139.328	169	0.533707	126.951	151	0.919017	141.098	206	0.9343	150.705	191	0.911349	188.885	278	1.89228	188.246	272	1.44978				124.148	155	0.539251
159.836	204	0.693398	130.475	166	0.523037	195.066	248	1.74207	182.59	263	0.664981	160.426	213	1.06609	143.787	183	1.10733	138.902	171	1.30468	153.689	187	0.986454	158.836	192	1.33783	193.574	250	1.29055				124.18	155	0.540583
160.262	206	1.38131	130.492	182	0.916677	174.836	211	1.37057	164.574	207	0.761195	177.574	225	1.72808	145.246	194	1.4014	140.066	184	0.785531	145.426	203	0.766128	136.049	184	0.842563	166.23	225	1.13862				124.197	155	0.542464
160.279	199	1.41438	130.508	171	1.12268	162.164	208	1.6072	147.885	192	0.772916	153.164	198	0.906469	135.23	162	0.892315	142.295	184	1.31447	163.41	216	1.42606	136.426	185	0.658416	191.574	235	1.55706				124.213	155	0.542595
160.311	192	0.671105	130.525	169	0.948986	152.557	195	1.91389	168.393	215	0.815535	145.426	178	0.610056	146.016	193	1.34571	140.984	167	1.12314	144.541	199	1.06228	157.443	203	1.2688	210.59	272	1.47578				124.23	155	0.542734
160.311	220	1.61863	130.557	160	0.925728	142.836	195	1.53758	151.574	197	2.48829	148.869	185	0.318587	132.164	161	0.91556	145.082	193	0.938037	148.492	193	0.982946	157.738	199	0.959815	160.82	229	1.63406				124.262	155	0.543086
160.574	218	1.56349	130.738	169	0.767323	155.23	211	1.76597	155.41	190	1.24994	152.934	195	0.322228	144.246	179	1.49419	152.885	224	1.15503	172.311	227	1.91358	150.918	200	1.01957	190.426	259	1.35313				124.361	155	0.543836
160.738	192	0.787897	130.885	170	0.978922	161.098	232	1.74932	142.459	197	1.5235	201.082	274	1.83568	128.295	160	0.590504	170.131	223	2.00581	156.525	195	1.29854	143.23	174	0.80998	204.787	263	1.65092				124.361	155	0.544182
160.754	197	1.27571	130.902	175	1.1558	144.869	180	1.86903	142.836	189	1.57197	153.213	217	0.591526	136.918	170	1.39883	142.361	199	1.14733	135.148	171	0.918049	159.508	204	1.52992	179.344	244	1.77597				124.377	155	0.546176
160.754	248	1.3238	131.016	177	0.751132	156.262	206	1.66481	134.967	154	1.2217	147.197	180	0.648742	146.213	202	1.28305	174.098	221	1.42313	150.623	205	0.970074	159.41	215	1.40761	161.656	211	1.29753				124.393	155	0.547236
160.934	202	1.137	131.082	161	0.979167	151.197	187	1.56294	138.066	195	1.26457	152.23	203	0.370221	172.836	232	1.62803	143.557	179	0.864326	139.918	175	0.91271	143.23	192	0.887007	174.754	234	1.42123				124.393	155	0.547586
160.967	198	1.28036	131.164	162	1.13354	159.803	206	1.38583	135.23	177	1.22049	170.459	216	1.02906	124.23	168	0.769664	160.098	206	1.47758	151.787	177	0.85213	150.869	185	1.22607	187.164	242	1.03847				124.393	155	0.54793
161.23	199	0.664178	131.164	172	1.0218	148.639	197	1.4441	146.656	178	1.68562	157.967	210	0.6271	142.541	189	1.44774	150.262	193	1.22975	146.41	185	1.09132	150.934	206	1.07029	213.541	305	2.15718				124.393	156	0.54836
161.279	206	0.702603	131.164	171	0.985008	171.574	238	1.84499	134.672	180	0.976876	145.295	179	0.852261	130.836	162	0.937936	191.164	262	2.07065	161.836	218	1.96203	150.164	177	1.56622	152.967	206	1.14543				124.41	156	0.548725
161.803	198	1.29189	131.197	167	1.06512	156.377	210	1.62934	142.246	195	1.27321	144.902	189	0.573676	136.246	172	0.916334	156.066	226	1.32874	154.852	193	1.18756	144.82	193	1.27183	170.639	218	0.963952				124.426	156	0.549373
162.377	201	0.989662	131.213	165	1.13316	148.77	198	1.43866	133.721	175	0.959847	138.148	166	0.858296	137.541	172	0.714473	151.443	189	1.13913	147.754	201	1.64744	158.049	208	1.4693	186.639	238	1.85721				124.492	156	0.55138
162.852	198	1.84067	131.213	162	0.825639	152.246	198	1.55061	142.131	185	1.35995	138.131	184	0.71713	131.361	159	1.03527	169.426	237	1.44766	166.115	207	1.03904	155.197	205	1.04217	165.852	226	1.41801				124.508	156	0.551459
162.934	201	0.904529	131.393	169	0.947293	151.098	192	2.11773	145.705	190	1.49645	147.426	204	0.772395	123.836	160	0.71673	170.377	203	2.25673	149.852	195	0.589214	142.77	192	0.782494	162.475	213	1.68036				124.525	156	0.552257
162.984	233	0.785665	131.459	163	0.61757	155.738	235	1.44815	159.344	199	1.64925	141.836	172	0.463429	134.951	177	0.989319	150.279	186	1.38182	154.475	206	0.844321	151.262	199	0.968703	151.115	202	1.11694				124.525	156	0.55298
163.066	195	1.15614	131.508	167	0.96383	163.754	214	1.74233	148.443	198	1.78745	168.295	203	1.85598	133.934	173	0.91606	167.574	224	1.32548	142.984	177	1.16865	147.869	186	1.23611	169.803	224	1.48367				124.557	156	0.553581
163.164	209	0.590537	131.525	176	1.10626	146.689	189	1.40806	142.885	192	1.0807	175.328	229	1.96788	146.656	174	1.24101	156.262	192	1.05387	164	210	1.52284	142.23	184	1.01464	175.393	235	1.79661				124.607	156	0.554084
163.574	223	1.60819	131.574	179	0.740343	160.574	206	1.87246	133.311	164	1.14551	152.639	194	0.619318	139.344	182	1.27499	165.902	240	1.53624	152.705	203	1.06322	176.77	224	1.56934	148.623	185	1.15074				124.607	156	0.55436
163.754	204	0.903809	131.59	180	0.919344	147.344	199	1.618	140.656	177	1.21454	187.639	254	1.78583	134.557	193	1.06812	157.852	210	1.24001	173.787	208	2.06098	209	273	2.06994	144.426	187	1.25463				124.607	156	0.554583
164	196	0.33879	131.689	167	0.958127	147.115	194	1.78274	145.18	188	1.38706	144.016	183	0.837467	127.41	164	0.59435	169.787	227	1.67734	143.754	182	0.927253	154.098	206	1.20857	161.295	201	1.63729				124.689	156	0.554875
164.361	219	1.47295	131.82	170	0.887574	143.967	188	1.59421	165.41	206	2.02707	144.738	179	0.523189	128.623	164	0.719338	190.59	266	1.66186	137.131	180	0.928598	152.984	197	1.19327	173.197	234	1.62494				124.705	156	0.554994
164.361	211	1.72039	131.869	172	1.0638	157.279	203	1.91941	139.344	177	1.14894	145.623	185	0.427075	139.721	191	1.14116	155.705	230	0.822918	158.967	200	0.893488	161.754	215	1.60518	144.295	184	1.20916				124.705	156	0.555244
164.754	209	1.34896	131.885	167	1.30392	158.918	211	1.81165	129.131	162	0.908206	145.984	217	0.390874	129.016	163	0.922364	159.656	205	1.10021	145.574	193	1.13279	174.148	236	1.10328	165.459	213	1.78132				124.705	156	0.556089
165.902	207	0.831641	131.934	180	1.32145	149.885	206	1.62569	140.197	184	1.10401	149.361	197	0.788318	148.098	204	1.30397	142.689	191	0.827088	160.213	193	1.73036	154.738	206	1.10352	144.344	208	1.08718				124.754	156	0.558398
166.115	206	1.45837	131.967	175	0.734147	161.787	195	2.05735	134.246	175	1.1785	182.754	241	1.64683	138.541	169	1.27331	146.738	181	1.25426	149.459	200	1.22286	161.049	202	0.911452	174.574	244	1.75735				124.77	156	0.558635
166.525	195	1.31238	132.049	184	0.462437	159.295	203	1.71614	130.295	165	1.22959	145.639	195	0.797726	128.869	166	0.810633	158.295	200	1.21668	158.934	198	1.15409	144.492	202	0.751173	153.836	196	1.62699				124.787	156	0.560183
167.328	207	0.903306	132.115	178	1.06106	166.049	243	1.65411	150.967	191	1.81223	149.984	193	0.646443	144.918	180	1.48291	165.639	214	1.91429	151.836	212	1.38765	143.459	188	0.813311	143.049	188	1.07487				124.787	156	0.560392
167.607	225	1.59881	132.131	178	1.08575	166.262	248	1.42754	153.361	193	1.39404	141.459	183	0.386421	124.787	161	0.672332	159.443	206	1.15108	162.656	227	1.29301	145.508	189	1.28925	177.115	233	2.09031				124.82	157	0.561158
167.836	203	1.29801	132.164	171	1.11307	170.705	227	2.15303	143.213	174	1.45604	145.836	192	0.449932	137.984	188	1.07594	145.574	176	1.38459	138.574	176	0.696402	147.672	186	1.10016	174.016	233	1.8834				124.836	157	0.56208
168.279	217	1.07297	132.213	160	1.03823	149.639	189	1.5373	143.902	195	1.29877	147.885	179	0.879954	126.246	164	0.842856	164.984	217	1.63865	177.656	223	1.57452	137	168	0.818601	134.541	180	1.25272				124.869	157	0.565082
168.279	211	1.48954	132.377	167	0.876054	148.574	200	1.79454	146.262	212	1.16343	159	205	1.1069	129.311	159	0.928204	180.754	265	1.60058	162.869	221	1.64102	143.836	187	0.781666	144.426	191	1.20722				124.869	157	0.565259
168.393	208	1.27228	132.41	181	0.905877	146.262	181	1.70354	148.066	181	1.47853	143.492	181	0.878687	145.066	182	1.3821	143.41	187	1.28052	141.525	195	0.797743	156.066	219	0.810869	144.213	196	1.15729				124.951	157	0.565315
169.131	238	1.11684	132.426	161	1.30151	154.934	203	1.63853	151.607	196	1.50969	138.951	190	0.647795	128.672	165	0.801713	145.344	178	0.925617	195.869	247	1.48583	147.885	200	1.31435	131.115	168	0.813362				124.967	157	0.565822
169.262	225	1.90939	132.426	176	1.10679	173.279	224	2.09779	160.115	207	1.92588	149.508	187	0.673503	156.246	203	1.59687	151.902	204	1.38911	156.705	211	0.817357	141.705	186	1.14008	140.016	183	0.78402				124.967	157	0.565923
169.918	222	1.49225	132.541	159	0.872736	161.967	214	1.44741	137	166	1.05771	143.262	186	0.826986	146.754	212	1.49418	153.885	200	1.52744	147.262	198	1.32572	146.967	185	1.26804	148.23	189	1.59746				124.984	157	0.565965
170.393	228	1.53002	132.541	160	1.35729	173.164	239	1.51297	137.689	186	1.23713	158.738	208	1.39875	127.836	161	0.995316	148.049	192	1.2985	186.082	234	1.34068	155.23	207	1.29727	161.869	204	1.58618				125	157	0.566202
170.459	214	1.59428	132.557	171	0.986903	176.197	227	1.86469	145.869	191	1.38749	150.164	180	0.968974	144.754	194	1.67737	163.967	219	1.29834	137.475	165	1.2733	150.951	191	1.65197	149.951	194	1.59133				125.016	157	0.566736
170.59	227	1.4154	132.689	161	1.16745	167.869	232	1.89399	162.279	225	1.55155	142.033	186	0.789565	135.213	171	1.09889	154.59	197	1.62995	178.033	230	1.72728	156.311	195	0.873406	144.131	197	1.22939				125.049	157	0.567424
172.066	210	0.480241	132.705	177	1.1484	160.049	201	1.99293	145.115	187	1.45408	137.77	167	1.01896	126.639	157	0.922339	144.377	186	0.894564	136.377	172	0.790863	148.131	195	1.44533	148.098	199	1.71929				125.066	157	0.567928
172.262	219	1.05576	132.738	172	1.36845	170.902	241	1.73434	173.525	233	1.68627	152.049	221	0.966316	132.344	166	0.940795	154.295	215	1.06986	159	198	1.11593	170.23	217	1.37555	146.148	185	1.14265				125.098	157	0.568198
173.41	232	1.63374	132.951	167	0.858228	152.23	196	1.7231	149.787	188	1.5737	155.377	209	1.05295	132.656	172	0.796959	175.279	234	1.83435	162.492	234	1.17802	154.689	199	1.63627	133.492	165	1.21002				125.115	157	0.568306
173.541	237	1.46076	132.951	164	1.16936	161.311	194	1.98595	149.639	192	1.66457	130.049	155	0.586778	134.934	186	0.706288	148.656	192	1.05819	143.721	192	1.10529	142.311	179	0.954958	139.557	177	1.28322				125.115	157	0.568844
174.475	229	1.31408	132.984	166	0.834655				130.098	173	0.942374	134.066	176	0.576796	157.279	213	1.8465	190.377	251	1.95796	146.557	176	1.188	147.033	195	1.05091	180.967	256	1.6627				125.131	157	0.569747
175.787	232	1.8961	133.016	154	0.762095				145.295	186	1.49752	133.967	160	0.838057	133.869	180	1.28849	156.656	206	1.33371	158.656	198	1.24754	150.639	200	1.43053	141.787	179	1.08015				125.197	157	0.570107
176.344	235	2.19995	133.066	161	0.917571				146	182	0.929934	128.639	153	0.662234	132.344	166	0.868346	150.82	196	1.59857	150.639	203	0.797689	190.885	262	1.68591	181.59	278	1.97735				125.23	157	0.570418
176.459	221	1.18451	133.148	198	1.01014				162.344	218	1.28037	138.508	184	0.832712	142.607	188	1.24818	149.475	181	1.50059	144.246	206	0.795295	146.525	198	1.51128	177.902	246	1.70449				125.246	157	0.570678
176.836	238	1.57051	133.295	173	0.677528				154.377	202	1.36145	170.344	219	1.51475	124.787	158	0.750294	156.246	198	1.58439	160.033	197	1.06289	139.361	172	0.589195	141.639	177	1.16836				125.246	157	0.571894
178.246	249	1.06498	133.377	176	0.906264				159.934	222	1.64991	188.557	260	1.80971	141.393	196	1.3876	144.82	177	1.2131	176.574	228	1.15914	145.705	190	0.763179	157.738	203	0.8731				125.279	157	0.571973
179.803	215	0.470941	133.508	187	0.708452				132.246	170	0.87386	134	169	0.712822	140.344	175	1.36369	147.098	181	0.9107	155.852	194	1.22225	140.475	180	1.10203	156.082	211	1.52239				125.311	158	0.572341
180.803	225	2.55389	133.607	174	1.2038				159.721	222	1.51169	139.984	191	0.967674	133.246	187	1.11466	141.689	186	1.00151	177.951	236	0.728956	149.311	183	1.09055	166.639	233	1.81559				125.393	158	0.572625
181.049	240	1.28019	133.721	165	0.746305				147.082	178	1.48986	148.393	181	0.792529	139.803	179	0.806973	152.328	213	1.23795	180.279	222	0.804519	146.574	187	1.13368	150.721	198	1.38352				125.393	158	0.572688
181.607	224	1.50013	133.738	168	0.683663				142.23	177	1.3692	142.492	174	0.603272	132.033	173	0.777738	137.197	172	0.828889	145.689	188	0.894212	179.508	244	1.48288	159.164	191	1.39669				125.41	158	0.573676
182.049	250	0.588695	133.77	171	0.937273				152.918	203	1.73317	153.049	188	0.810834	126.377	152	1.11594	147.295	195	1.53562	156.59	213	1.32896	152.852	211	1.4017	162.918	207	1.55971				125.426	158	0.575157
182.131	226	1.24386	133.836	177	1.12388				150.738	189	1.519	135.18	172	0.883268	140.705	187	1.2771	143.344	183	1.0635	196.279	265	2.12451	154.59	193	1.18018	164.787	236	1.46143				125.459	158	0.575239
182.148	225	1.1881	134.115	169	1.05963				132.934	170	1.0129	130.443	158	0.649887	125.59	152	0.756784	142.082	171	0.981588	152.115	199	1.03411	147.016	193	1.31649	184.869	266	1.51189				125.475	158	0.576796
182.705	222	0.599847	134.115	180	1.31186				150.262	209	1.52415	162.59	210	0.976775	135.705	169	0.937553	158.705	195	1.57714	190	231	1.82992	131.623	178	0.817252	163.869	228	1.36191				125.557	158	0.576894
183.246	218	1.84738	134.148	168	1.24816				144	197	1.37799	171.295	227	1.5839	140.016	175	1.26623	156.131	198	1.28144	149.197	184	1.07896	144.23	183	0.81769	139.279	179	0.636295				125.59	158	0.577524
183.951	223	0.683329	134.18	170	0.985753				142.59	196	1.31087	162.557	208	1.57281	143.18	191	1.34118	149.115	205	1.36593	161.803	199	1.1156	146.967	202	0.85405	181.311	248	1.71945				125.59	158	0.57876
184	225	0.996331	134.295	176	1.0454				142.951	183	1.446	153.82	193	1.0223	131.525	159	0.868302	144.754	178	1.52263	158.443	226	1.06747	142.344	184	0.908973	147.82	213	1.35859				125.623	158	0.579189
184.869	232	1.26654	134.295	172	0.888236				156.148	194	1.58193	158.41	195	0.683774	151.934	212	1.34004	149	187	1.43462	149.148	189	0.729083	146.967	195	1.04	154.033	183	1.24065				125.623	158	0.57996
187.59	234	0.458903	134.311	168	0.972358				144.18	181	1.4681	133.131	178	0.790206	126.115	158	0.759496	147.213	204	1.35411	134.557	167	0.903343	146.033	189	0.869081	141.262	182	0.94906				125.639	158	0.580236
188.311	258	1.53711	134.377	164	1.08261				129.361	166	0.944669	160.607	213	0.905955	143.361	176	1.61255	155.115	196	1.27066	185.459	238	1.83094	143.41	182	0.852785	143.656	183	1.01778				125.639	158	0.580357
189.426	247	1.51426	134.41	165	0.808362				143.033	186	1.13368	145.639	199	0.768719	143.033	191	1.16912	141.721	188	1.06163	158.705	214	1.16837	148.902	195	1.26021	139.148	199	0.839282				125.656	158	0.580851
190.098	234	0.609095	134.426	174	0.954416				135.721	172	1.29498	140.098	189	0.981932	134.705	170	1.1176	136.246	174	0.955105	150.852	183	1.13827	177.803	222	1.78134	147.623	185	1.14199				125.705	158	0.582321
190.951	238	0.494605	134.443	176	1.04481				137.328	174	1.29121	140.164	173	0.748764	136.459	171	1.35336	143.049	191	1.21438	156.131	200	1.43656	147.328	187	0.850294	183.295	231	1.80894				125.721	158	0.583336
191.066	241	1.07701	134.492	169	1.13604				150.115	200	1.67238	160	215	0.886013	135.623	168	1.34618	149.049	184	1.50089	156.23	198	1.42057	133.18	166	0.794178	156.82	207	1.24892				125.787	158	0.583837
191.131	231	0.568198	134.672	177	0.846076				161.557	220	1.7729	155.639	190	0.960825	151.377	196	1.48204	137.984	168	1.16792	156.115	193	1.03327	154.918	199	1.00588	151.59	186	1.16465				125.787	158	0.584356
192.869	239	0.65306	134.721	163	0.805253				139.836	171	1.41681	174.951	256	1.25791	128.918	165	0.755913	172.869	244	1.72388	182.213	296	1.51235	148.492	191	1.03779	167.246	231	1.30631				125.82	158	0.585206
193.639	236	0.243496	134.852	167	0.73369				127	158	0.834284	142.607	196	0.609249	126.836	163	0.78379	146.475	190	1.12832	154.18	206	1.22845	177.918	234	1.46824	191.41	243	2.06872				125.852	158	0.586778
194.18	246	0.856034	134.902	174	1.23096				130.459	160	0.971271	179.721	250	1.58038	130.705	173	1.00585	140.344	192	0.932112	164.213	206	1.60268	158.77	201	1.40691	157.213	203	1.16361				125.934	158	0.586982
194.639	240	0.534208	134.984	176	0.94314				163.902	213	1.92955	179.197	241	1.61643	132.738	174	1.10827	142.623	175	1.01056	151.77	187	0.862583	142.607	197	1.02214	151.41	199	0.923461				125.967	158	0.588198
195.869	248	0.449893	135.049	164	1.26886				139.098	171	1.08465	170.951	248	1.3633	129.082	157	0.880041	154.852	193	1.31528	149.131	201	0.851405	166.721	209	0.931829	194.852	285	1.80535				125.967	158	0.588331
195.902	236	0.504152	135.148	164	1.11407				153.639	198	1.33142	156.984	200	0.77487	127.377	188	0.79619	156.033	231	0.828371	152.59	204	0.827145	153.344	200	1.23045	188.902	238	0.714087				125.967	158	0.58838
196.049	243	0.742832	135.164	173	0.668213				152.508	203	1.61277	146.787	179	0.766908	130.344	159	1.14014	131.869	181	0.993492	152.525	197	1.31643	138.344	182	0.976977	178.787	217	0.914387				125.984	158	0.588695
196.754	243	0.429815	135.262	169	1.1399				134.295	177	1.15588	146.328	184	1.08305	125.787	174	0.583837	131.459	161	1.17054	147.705	203	0.921052	133.049	179	1.29153	204.803	273	1.2484				125.984	159	0.589195
197.328	241	0.643016	135.279	175	0.941461				136.77	174	1.37105	163.689	202	1.41935	153.246	195	1.87402	136.607	163	1.11833	171.049	223	1.27401	152.098	197	1.25257	217.475	278	0.769018				125.984	159	0.589214
199.689	251	0.715364	135.328	171	1.11918				150.836	202	0.740257	164.557	208	1.23863	131.475	159	1.24896	141.23	181	1.37911	153.656	210	1.20709	132.869	170	1.23023	257.557	388	1.54188				126	159	0.589583
199.705	254	0.576894	135.574	175	0.693282				193.377	276	1.37846	137.295	173	0.554583	139.197	174	1.12246	139.361	183	0.839747	148.295	182	0.873983	132.77	171	1.0975	178.525	216	0.572625				126.066	159	0.589818
200.967	249	0.600483	135.59	174	1.20232				190.951	241	1.09643	141.082	175	1.1102	137.279	199	1.13811	130.361	173	0.657301	144.082	175	0.787766	130.607	153	1.08179	182.885	226	1.25261				126.115	159	0.590504
203.623	262	0.480603	135.623	176	1.01857				178.77	216	0.914913	167.213	197	1.18052	137.557	177	1.28404	136.066	173	1.20875	148.508	234	1.0708	143.311	177	1.54525	304.361	448	1.59077				126.164	159	0.590513
203.918	264	0.435954	135.656	199	1.13876				132.049	173	1.58901	153.475	196	0.705996	133.049	168	0.837479	149.656	191	1.46237	144.934	178	0.808991	143.574	201	1.13781	218.492	274	1.46184				126.164	159	0.590537
204.033	266	0.502951	135.738	167	0.943059				156.426	210	2.17642	141.131	186	0.83152	130.426	166	0.722309	136.918	179	1.13401	163.787	214	1.43309	144.246	188	1.41337	204.492	273	1.14141				126.23	159	0.591354
204.148	298	0.530394	135.754	167	1.19891				199.639	255	1.15241	139.787	181	0.656115	128.623	167	0.715629	149.574	183	1.48064	153.23	211	1.12592	140.377	174	0.920485	234.803	340	1.61697				126.246	159	0.591526
205.574	274	0.465261	135.82	188	0.972298				163.279	215	1.83378	148.426	191	0.774918	132.918	176	0.81905	133.164	166	1.19185	192.918	265	1.95175	132.885	162	1.16105	208.984	284	1.45031				126.246	159	0.592017
206.213	246	0.377998	135.82	165	0.894038				179.115	223	1.17039	141.459	180	0.987059	135.197	183	1.28886	150.295	197	1.60332	161.541	202	1.01442	139.787	189	1.02699	214.984	287	1.21343				126.262	159	0.592534
206.23	242	0.353041	135.836	178	1.11351				135.934	188	1.1177	150.541	180	1.0565	132.23	174	1.13735	147.361	186	1.50559	163.557	230	1.2596	145.869	182	1.35354	210.967	306	1.1829				126.279	159	0.592812
206.23	266	1.36289	135.852	175	1.09835				132.311	165	1.33092	145.18	184	0.913028	132.705	163	1.00048	155.279	212	1.61445	164.754	262	1.33166	141.508	180	1.22172	221.049	291	1.24391				126.279	159	0.593488
207.213	255	1.52557	135.869	177	0.626862				141.574	184	1.52797	162.262	199	1.4101	126.689	167	0.937109	146.508	204	1.46484	205.59	279	2.20258	130.967	161	1.04502	151.967	200	0.943033				126.328	159	0.59435
207.279	257	0.941612	135.885	164	0.608231				134.492	172	1.03241	163.738	200	0.78731	140.836	185	1.01899	174.41	222	1.70244	155.803	207	1.06877	151.508	185	0.950914	155.672	200	0.660696				126.328	159	0.594476
208.885	257	0.363994	136.164	180	0.565315				138.77	173	1.42787	146.738	184	0.542595	120.279	167	0.738598	157.262	219	1.56865	156.213	204	0.954159	134.951	187	0.959652	152.787	188	1.02983				126.328	159	0.59454
209.098	292	0.476463	136.18	163	1.27486				136.557	188	1.41293	162.721	195	0.896393	141.131	201	1.09953	154.951	200	1.60912	158.246	220	1.32854	139.23	173	0.896702	188.77	262	1.6468				126.344	159	0.594647
209.918	259	0.464253	136.197	171	0.801603				123.984	157	0.668143	147.508	192	0.659215	137.885	183	1.01995	135.344	164	0.94604	156.279	204	1.2615	130.623	168	0.970639	186.295	222	1.5216				126.361	159	0.596697
210.098	260	1.27988	136.246	174	0.829652				127.18	164	0.937317	168.18	229	1.27875	130.984	170	1.02015	157.148	213	1.87972	157.738	190	0.808488	152.705	205	1.80059	155.918	204	1.31158				126.377	159	0.597019
210.393	260	0.258609	136.262	175	0.954273				149.393	192	2.04839	143.918	187	0.967121	137.344	192	1.12197	161.098	222	1.73024	163.033	201	0.835534	159.721	212	0.947677	164.049	210	1.30836				126.393	159	0.597439
210.508	275	0.253571	136.295	169	1.14775				150.164	202	1.4742	142.23	193	1.06343	131.393	177	0.765167	139.984	186	1.35266	152.721	180	0.812038	134.164	177	1.15312	178.82	232	1.65364				126.443	159	0.598596
210.885	261	1.56135	136.377	173	1.03016				139.393	190	1.41431	143.016	186	0.745968	156.787	210	1.72045	143.984	192	0.935112	161.213	199	1.15606	136.131	177	1.2676	156.525	191	1.85313				126.459	159	0.598855
211.475	254	0.411127	136.443	157	1.10078				153.377	208	1.52373	144.131	180	0.690509	125.115	173	0.560392	164.459	224	1.49293	162.393	201	0.7357	133.295	169	1.16263	142.885	184	1.20403				126.475	159	0.598863
211.623	270	1.11507	136.459	176	0.931293				142.049	190	1.34695	141.951	179	0.77392	143.082	183	1.45109	154.607	230	1.45109	183.869	247	1.41156	141.213	178	1.21863	142.098	195	1.15111				126.508	159	0.599847
212.852	260	0.72986	136.639	205	1.37692				150.885	212	1.37527	153.82	189	1.15878	147.262	181	1.21707	148.23	195	1.19515	178.197	260	1.38781	143.23	199	1.45841	162.016	214	1.49494				126.508	159	0.600023
213.18	257	0.672144	136.689	171	0.852165				147.984	196	1.75328	140.705	174	0.793749	131.803	167	0.816991	138.803	178	0.905866	169.869	218	0.906567	141.984	183	1.27458	203.475	265	1.42158				126.557	159	0.600129
213.623	278	0.957191	136.721	170	0.539251				159.18	191	2.16438	139.836	184	0.853405	146.951	191	1.50785	134.41	177	0.941833	186.607	250	1.51921	138.738	185	1.20582	189.754	237	1.03883				126.557	159	0.600458
213.984	289	0.67223	136.738	174	1.19341				148.459	197	1.58073	143.164	192	0.733764	127.902	169	0.925116	180.721	275	1.51182	150.59	188	1.26384	134.574	164	1.01201	195.344	234	1.20302				126.574	159	0.600483
214.131	263	0.888536	136.77	192	0.843943				142.361	182	1.24818	121.574	144	0.696163	151.41	196	1.48385	170.066	235	1.6445	165.016	210	1.1207	157.393	247	1.63183	179.836	227	0.677677				126.574	159	0.601267
214.23	267	0.836202	136.77	188	0.819245				130.541	164	0.594476	145.902	190	0.993502	142.508	178	1.36078	144.82	185	1.28475	180.82	242	1.36172	129.869	166	1.14699	233.361	346	1.35921				126.59	159	0.601556
214.738	263	0.49523	136.787	165	1.11102				147.623	205	1.04123	150.262	179	0.981629	136.902	176	0.830301	151.689	211	0.928077	160.115	190	0.659739	130.984	158	0.958182	204.393	266	1.19097				126.607	159	0.60183
215.803	260	0.529045	137.131	198	1.41252				140.574	179	1.29758	142.033	187	1.06344	126.344	160	0.760723	177.869	229	1.64527	171.541	243	1.52407	148.803	207	1.44301	174.984	236	1.058				126.607	159	0.602015
216.574	264	0.561158	137.164	164	0.586982				152.574	219	1.14024	147.492	178	0.980725	123.344	153	0.579189	167.41	199	1.72596	171.541	231	0.871025	137.984	174	0.925172	202.984	324	1.595				126.623	159	0.602711
216.689	264	0.393902	137.18	187	0.954438				159.869	228	1.39645	129.885	160	0.724277	123.033	157	0.679716	135.525	174	1.00908	134.689	217	0.656041	142.574	172	1.23584	205.016	270	1.75058				126.623	159	0.603272
217.475	263	0.372437	137.18	181	1.25661				157.967	206	1.73041	158.066	197	1.14078	124.393	151	0.986837	145.951	176	1.19196	155.197	211	0.674938	151.672	190	1.338	150.016	186	0.762189				126.623	159	0.603406
218.115	287	0.669753	137.197	166	0.793349				155.049	211	1.51497	152.967	185	1.2727	123.738	163	0.555244	174.033	235	1.81933	150.787	200	1.4095	147.016	204	1.1342	145.902	216	1.52651				126.639	159	0.60419
218.148	280	0.606049	137.328	177	1.1558				154.098	204	1.49823	141.164	173	0.757621	139.705	171	1.30215	149.607	188	1.47672	152.82	196	1.4968	155.426	207	1.18955	141.918	178	1.39817				126.656	159	0.604251
218.639	259	0.52796	137.557	180	1.09833				146.328	212	1.33155	138.033	179	1.15986	135	181	0.566736	167.131	215	1.44404	148.377	217	1.16536	135.279	171	1.04727	155.885	208	1.51103				126.672	159	0.60579
218.836	278	0.492497	137.721	188	0.659417				148.689	237	1.20776	150.344	181	1.03982	136.295	175	0.860684	145.311	175	0.843207	132.361	180	0.874763	143.623	177	0.991421	133.426	188	1.00359				126.689	160	0.606049
219.705	258	0.53051	137.77	181	1.09054				144.492	191	1.40148	148.689	183	0.769277	124.098	157	0.72906	166.639	212	2.1812	142.344	190	1.36204	148.803	215	1.47964	142.393	186	1.65647				126.705	160	0.606537
219.77	282	0.396574	137.803	165	0.875995				151.459	210	1.4996	147.049	192	0.741573	135.574	191	0.542734	148.377	193	0.94946	151.23	194	1.42279	173.984	228	1.67313	139.279	171	1.14441				126.721	160	0.608188
219.984	286	0.175724	137.82	174	1.03209				135.197	179	0.952399	132.459	172	0.821326	136.492	187	0.819866	148.902	190	1.55101	140.328	184	1.06027	131.361	172	0.751349	157.918	204	1.71181				126.721	160	0.608231
220.23	278	0.427924	137.836	162	1.51528				145.393	191	1.3291	143.902	193	0.763569	138.066	190	1.12782	146.738	195	1.08656	143.426	177	1.22428	150.557	207	0.974778	150.934	224	1.63502				126.754	160	0.608523
220.361	270	0.623239	137.885	173	0.691983				141.918	185	0.994122	169.295	219	1.71386	130.049	156	0.988786	146.033	183	1.47769	170.246	214	1.25769	150.131	181	1.32062	134.508	171	1.39701				126.77	160	0.609095
220.426	266	0.347634	137.984	179	0.519535				130.738	165	1.02132	150.016	185	0.951224	126.623	165	0.899356	145.41	177	1.28302	133.344	161	0.991507	139.475	190	1.13319	134.393	168	1.00287				126.787	160	0.609249
220.803	282	0.542464	138	189	1.09724				136.262	168	1.00225	145.59	171	1.16049	132.066	159	0.683853	156.246	216	1.54774	149.59	191	1.44214	148.098	184	0.895303	130.393	166	0.974057				126.803	160	0.610056
220.82	293	0.302595	138.033	177	0.60579				139.574	193	1.21022	149.131	184	0.838948	142.836	192	0.978261	172.246	229	1.64676	150.951	201	1.67495	171.934	235	1.79109	153.393	203	1.26318				126.836	160	0.610718
222.557	266	0.226552	138.049	163	1.08793				179.967	253	1.65131	145.197	179	0.785182	129.705	163	0.622086	135.525	170	1.384	163.803	218	0.893219	152.033	205	1.23943	147.82	183	1.30778				126.852	160	0.610843
223.328	274	0.813639	138.115	171	0.83685				149.852	185	0.863078	143.049	170	0.926996	129.803	159	0.782776	152.656	203	1.14251	153.607	197	0.828348	138.82	169	1.25177	153.557	209	1.18304				126.852	160	0.611226
225.082	314	1.40255	138.197	172	1.25768				144.967	189	1.16347	161.279	211	1.37902	136.426	174	1.27647	151.344	216	1.23043	152.033	181	1.64113	144.131	178	1.04094	166.213	224	1.97747				126.885	160	0.612748
225.836	276	0.367909	138.279	178	1.35697				163.344	210	1.77919	147.639	190	1.04653	131.541	165	0.448021	158.836	214	1.10851	160.574	208	1.32716	150.754	216	1.03925	144.082	192	1.22089				126.885	160	0.613026
225.967	267	0.399345	138.426	178	0.802004				143.902	201	1.01466	138.77	193	0.647373	155.787	205	1.33008	158.918	213	1.62185	149.787	190	1.32809	160.098	217	1.66717	154.639	192	1.66923				126.918	160	0.614039
226.77	287	0.525374	138.492	177	1.13604				154.033	218	1.4594	153.393	200	1.64528	135.164	170	0.948128	140.967	207	1.2236	156.066	203	1.57163	143.344	179	1.62853	152.639	201	1.35367				126.951	160	0.615907
227.115	273	0.755989	138.541	180	0.989128				138.836	180	0.860702	159.508	252	1.70322	141.459	169	1.55539	139.689	187	1.00382	158.836	222	1.01334	146.492	202	0.910393	148.213	191	1.27191				126.967	160	0.616535
227.557	270	0.540583	138.557	176	1.63755				147.525	186	1.04074	140.443	176	1.27141	126.967	162	0.666942	143.377	194	1.24306	159.279	204	1.27267	158.951	222	1.38203	153.525	197	1.94132				126.967	160	0.61757
228.377	295	0.823533	138.557	170	0.622731				155.803	206	1.62207	130.787	155	0.759916	129.623	186	0.718913	145.443	203	1.27118	150.361	201	0.757727	147.705	184	0.989179	161.607	206	1.72963				126.984	160	0.619318
228.77	296	0.626155	138.59	180	0.67502				143.049	195	0.641779	136.377	173	0.852145	137.557	170	0.863698	157.754	200	1.14777	158.115	204	1.28859	183.443	236	1.62324	141	187	1.21675				126.984	160	0.619743
228.836	300	0.814551	138.59	178	0.712669				143.049	195	0.641779	150.967	209	1.49177	141.82	184	0.688395	141.18	175	0.957764	150.623	177	0.606537	146.082	180	0.913405	143.082	187	0.933974				127	160	0.619849
229.213	285	0.631708	138.607	185	1.00095				144.41	189	0.941222	132.721	174	0.972553	144.951	182	0.903101	169.82	221	1.6025	183.377	232	2.20498	147.623	186	1.29503	151.164	192	1.11893				127	160	0.620256
231.541	308	0.547236	138.672	191	1.24721				142.426	190	1.07907	159.016	212	1.73417	116.361	153	0.72249	155.984	204	1.3546	147.574	185	1.13775	140.689	172	1.00246	155.639	196	1.3361				127.049	160	0.620807
232.18	318	0.986968	138.803	186	1.1274				171.213	232	1.46124	126.279	194	0.863541	123.098	150	0.870171	145.23	185	1.64853	166.639	218	1.55219	169.934	230	1.62932	142.082	169	1.04571				127.049	160	0.621666
232.295	284	0.768356	138.82	182	1.24043				168.836	242	1.69523	120.262	145	0.690316	120.836	148	0.980217	152.852	197	1.32359	145.639	182	1.03588	139.836	198	1.07082	161.311	205	1.24148				127.066	160	0.621718
235.344	307	0.855422	138.951	191	0.485312				135.738	168	0.638862	127.738	162	0.740605	130.639	185	1.03552	150.721	186	1.58639	162.049	217	1.47801	154.033	206	1.31051	142.295	179	0.83533				127.066	160	0.622086
241.311	310	0.518865	138.967	169	1.28703				164.902	220	1.38331	127.066	165	0.79794	130.705	159	0.97447	170.967	229	1.87087	134.574	163	0.814186	157.098	210	0.709561	147.082	188	1.3785				127.066	160	0.622446
241.934	320	0.868648	139	177	0.544182				152.311	196	1.75243	146.115	194	0.800785	127.41	170	1.01816	137.066	178	1.32495	149.016	176	1.68296	156.869	188	1.17456	147.721	197	1.13293				127.098	160	0.622448
250.607	323	0.825504	139.066	193	0.992459				153.344	194	1.07002	138.213	185	0.926354	142.115	186	1.19798	153.623	214	1.71245	136.852	186	1.10878	131	173	0.946664	139.426	179	0.753776				127.115	160	0.622731
253.541	348	1.2625	139.131	164	0.919277				183.902	287	1.50066	153.23	209	1.18727	124.967	152	0.695308	135.869	172	1.0399	129.967	155	1.17447	153.311	193	1.60069	157.672	209	1.38601				127.131	160	0.622862
			139.213	185	0.688326				152.344	191	1.79403	135.049	171	0.848171	135.967	191	1.09653	148.098	182	1.30298	151.049	201	1.032	143.639	186	1.26394	154	195	1.51625				127.148	160	0.623153
			139.23	181	0.746237				192.475	262	1.98065	131.459	157	0.783844	130.262	163	0.738583	165.246	231	1.34128	171.885	231	1.51882	146.557	188	1.01028	156.967	222	1.05771				127.18	160	0.623239
			139.23	180	0.676703				160.836	217	1.04916	150.213	188	1.8104	126.918	167	0.78333	138.984	190	1.04973	138.59	182	1.05247	151.393	189	0.929989	165.098	214	1.82702				127.18	160	0.623939
			139.262	202	0.598863				195.77	270	1.78132	131.23	162	1.10701	120.541	152	0.813888	156.393	208	0.765774	135.803	167	0.656917	159.738	205	1.27464	164.738	219	1.35867				127.18	160	0.62416
			139.262	169	1.02068				186.082	249	1.71684	150.475	195	1.15595	128.984	175	0.647669	148	196	0.857105	153.164	184	0.942878	158.393	213	1.31076	151.639	187	1.55045				127.23	160	0.624444
			139.361	177	1.25388				188.213	249	1.81341	144.148	190	1.37498	130.525	181	0.678058	166.426	214	1.68228	159.639	215	0.954102	158.246	198	1.12662	161.689	205	1.75077				127.262	160	0.624612
			139.361	173	1.06796				182.492	233	1.68638	129.705	165	0.580851	131.574	181	0.78577	154.656	199	1.25844	146.492	186	0.674381	137.148	182	1.05477	148	189	1.18167				127.328	160	0.624807
			139.361	171	0.989672				203.689	321	1.56757	130.443	160	0.679478	128.574	165	0.892913	167.525	212	1.73467	153.508	207	0.932988	148.869	188	1.18441	143.295	184	0.862032				127.328	160	0.625394
			139.393	180	0.672813				186.902	251	1.83999	130.689	172	0.795417	131.918	200	0.790768	164.787	236	1.38416	144.836	192	0.958153	145.951	184	0.721988	171.689	239	1.47932				127.361	160	0.626155
			139.475	190	1.46804				191.803	285	1.62539	162.131	207	1.59411	132.656	189	0.686427	169.443	221	1.21352	151.82	190	0.796778	137.066	164	0.979991	166.869	213	1.77153				127.377	160	0.626165
			139.475	173	1.04679				178.426	249	1.57118	134.787	159	1.14426	134.885	172	0.78809	143.836	191	0.841056	138.262	174	1.2055	158.951	208	1.68174	183.344	244	1.38489				127.393	160	0.626207
			139.639	174	1.025				181.689	260	1.536	140.344	167	1.42152	130.426	166	1.17082	137.475	177	0.761976	144.328	176	0.963166	141.918	180	1.40885	192.016	245	1.6575				127.393	160	0.62627
			139.656	173	1.24358				152.705	195	0.900599	130.082	172	0.731231	122.754	147	0.568844	141.607	186	1.08723	152.344	192	1.34796	147.754	187	1.32333	222.918	300	1.7086				127.393	160	0.626862
			139.672	212	0.524672				155.77	202	1.2077	142.082	162	1.10249	122.393	159	0.659283	168.951	239	1.45894	134.656	173	0.677672	158.23	196	1.16978	170.492	219	1.35253				127.41	161	0.6271
			139.689	174	0.855539				163.033	214	1.59803	140.672	196	0.906804	124.607	153	0.669444	150.18	183	1.38367	132.836	170	0.891031	138.656	175	1.00554	163.623	220	1.3177				127.41	161	0.628755
			139.689	166	1.34231				144.295	193	0.641553	138.885	177	0.902991	122.918	151	0.828041	151.574	197	0.782851	181.82	267	1.60795	137.459	183	1.09962	208.082	258	1.28237				127.41	161	0.629885
			139.721	182	0.507057				188.623	295	1.65634	140.557	189	0.93475	127.557	166	0.869501	174.213	244	1.54678	156.393	197	1.54024	159.836	210	1.24817	195.098	236	0.83806				127.41	161	0.630133
			139.754	179	1.16327				150.705	200	1.37548	141.705	200	0.774748	126.328	168	0.831255	152.377	192	0.933866	158.361	194	1.47663	146.803	206	1.1107	231.18	296	1.35859				127.443	161	0.630407
			139.852	186	1.25654				183.852	256	2.00499	132.033	173	0.698695	129.279	162	0.560183	146.459	178	1.32957	146.869	205	1.05855	143.574	180	1.17339	193.213	254	0.740443				127.475	161	0.630439
			139.984	205	0.734264				139.639	189	1.06465	149.344	184	1.03026	125.279	149	1.01463	180.049	234	1.81193	146.164	194	1.02514	146.77	196	1.39878	208	265	0.748004				127.492	161	0.630827
			140.131	215	0.753642				144.705	189	1.23651	173.508	241	2.02585	140.656	184	1.16845	170.852	226	1.88087	167.689	204	1.64827	146.262	180	1.35118	204.426	262	1.13925				127.525	161	0.631296
			140.164	185	1.09717				148.459	215	1.47189	138.705	178	0.926347	128.738	166	0.777947	133.459	177	0.74831	135.41	164	1.13111	136.41	176	0.954473	213.852	283	1.47189				127.541	161	0.631708
			140.23	186	0.639194				147.705	189	1.51627	123.869	154	0.721784	142.049	181	0.940398	173.393	241	1.69556	144.443	177	1.16452	148.115	185	1.3553	200.934	249	1.39021				127.557	161	0.631873
			140.262	174	1.02509				144.262	191	1.07848	136.918	183	1.0471	158.852	229	1.47863	161.148	215	1.65204	146.443	181	0.848005	141.902	175	1.07895	198.197	256	1.27				127.557	161	0.631921
			140.279	185	1.15861				136.984	171	1.20828	155.607	198	1.91455	136.951	172	1.12904	171.443	229	1.72863	139.23	174	0.844518	133.967	169	0.839561	184.836	242	0.792628				127.623	161	0.632087
			140.295	181	0.881514				128.77	162	0.636016	149.984	201	1.40519	125.59	156	0.629885	168.59	234	1.52909	139.803	180	0.858993	150.885	210	1.42559	214.41	278	1.45361				127.656	161	0.63266
			140.311	167	0.984104				193.869	250	1.48144				155.443	202	1.7725	168.033	207	1.45378	155.934	198	1.04342	141.934	172	1.37755	202.869	287	1.4615				127.689	161	0.634126
			140.377	173	0.977787				162.016	222	0.771144				144.82	192	0.983445	185.131	285	1.73928	166.492	208	1.27547	138.984	186	1.31527	210.525	274	1.40582				127.721	161	0.634791
			140.377	196	1.18737				195.115	260	1.23269				170.41	218	2.05691	184.967	230	1.81227	160.721	215	1.3331	141.213	196	0.816902	178.246	209	0.684894				127.738	161	0.634854
			140.508	177	1.10912				156.148	191	0.622446				133.525	174	0.859874	183.41	248	1.46012	166.672	202	1.51709	147.59	197	1.52035	211.82	289	1.95369				127.77	161	0.635469
			140.541	179	0.973775				169.197	205	0.644589				131.23	158	0.954842	183.754	229	2.02398	144.885	208	1.04027	135.77	167	0.968089	161.049	204	1.12198				127.787	161	0.636016
			140.574	184	1.00898				197.23	258	1.19352				135.705	184	1.2154	164.344	210	1.86212	172.18	230	1.4293	140.459	176	0.995446	149.787	202	0.8883				127.836	161	0.636295
			140.574	174	1.3313				194.18	250	1.29935				132.836	179	1.03051	164.475	249	1.66042	165.131	202	1.28453	147.197	186	0.787934	155.689	204	1.11639				127.836	161	0.636887
			140.639	176	1.11169				185.41	235	0.923613				155.869	218	1.67058	157.951	192	1.20125	154.508	207	1.45033	140.41	175	1.06779	191.574	230	0.905009				127.869	161	0.637692
			140.705	185	1.37855				183.508	228	0.948111				151.623	188	1.30217	157.328	194	0.938529	131	169	0.762959	146.328	186	1.24111	181.656	271	1.70244				127.869	161	0.638862
			140.77	172	1.35319				183.803	248	0.69838				137.803	190	0.656294	181.934	250	1.93527	156.213	190	1.13637	145.41	191	1.12112	158.639	206	1.24301				127.902	161	0.639189
			140.885	194	1.3957				187.672	234	1.02106				186.049	260	1.84566	171.016	228	1.55565	160.77	208	1.439	147.279	177	1.45314	161.885	204	1.23036				128	161	0.639194
			140.902	185	0.52593				192.607	273	0.794258				134.246	172	1.08305	155.656	211	1.22343	153.098	184	1.35953	143.885	180	1.17748	162.918	206	1.3831				128.016	161	0.639685
			140.918	180	0.808722				184.984	249	0.900479				141.23	176	1.2411	158.115	190	1.4412	133.902	173	0.729135	130.475	176	0.878464	149.443	190	1.41213				128.033	161	0.639712
			140.984	174	0.648269				139.639	179	1.12972				135.82	172	1.09738	162.951	198	1.91479	151.984	189	1.31171	134.738	174	1.32512	165.836	210	1.58032				128.049	161	0.639823
			141	188	1.26669				129.475	170	1.15584				127.18	158	0.789948	148.295	187	0.742568	159.721	205	1.10094	149.639	181	1.43134	185.049	260	1.68474				128.049	161	0.641553
			141	186	0.907616				124.869	162	0.898849				121	154	0.495162	145.967	179	1.09272	167.77	208	1.85119	151.738	211	1.43796	155.787	212	1.15228				128.098	161	0.641779
			141.033	177	1.30913				131.279	165	1.10089				135.098	162	0.836183	174.426	214	1.79788	156.852	203	1.38878	148.098	190	1.07523	190.443	236	1.35997				128.115	161	0.641779
			141.066	188	0.932618				126.164	178	0.851529				134.787	167	1.35723	161.852	221	1.3584	141.885	181	0.656092	135.672	182	0.983116	160.033	208	1.52236				128.131	161	0.642079
			141.066	189	0.679013				130.23	170	1.38361				126.721	165	0.537457	149.852	188	1.16478	155.148	203	0.857077	139.656	179	1.18583	175.918	211	0.710351				128.148	161	0.643016
			141.066	197	0.774539				142.23	195	1.28083				139.328	168	1.88573	157.82	214	1.64866	177.934	219	1.67992	136.541	179	1.02696	211.033	274	1.38406				128.164	161	0.643037
			141.131	171	0.454801				147.738	191	1.56691				137.623	180	0.934417	157.492	198	1.57244	152.951	193	1.08552	138.049	191	1.08824	199.131	272	1.61883				128.213	161	0.643073
			141.213	170	0.882819				144.787	219	1.11792				135.852	179	0.727259	152.279	199	1.03579	182.885	239	1.72242	149.672	181	1.2202	163.705	213	1.56221				128.23	161	0.643814
			141.328	204	0.985585				139.295	171	1.1557				124.557	155	0.856288	162.754	216	1.42932	152.115	186	1.56161	148.131	186	1.08058	163.672	204	2.17088				128.23	161	0.644128
			141.344	186	0.806559				134.41	164	1.12841				144.607	194	1.30069	148.082	189	0.669289	162.082	214	1.76887	130	164	0.970401	147.41	198	1.30109				128.23	161	0.644512
			141.344	172	1.11847				134.361	179	0.947585				139.738	197	0.856928	163.344	222	1.41968	153.951	204	0.731439	134.361	168	0.999055	145.246	186	1.38047				128.23	161	0.644589
			141.377	184	0.98937				137.525	168	1.13835				130.852	172	0.909655	155.902	213	1.29811	135.279	168	0.908065	127.115	162	0.743475	132.41	164	0.898666				128.246	161	0.644605
			141.426	172	1.37033				143.574	200	1.2851				133.328	171	1.06816	188.689	246	2.25763	158.607	199	1.33266	142.426	199	1.19133	144.475	188	1.34282				128.262	161	0.644686
			141.443	190	1.31915				135.852	180	1.19871				127.541	164	0.67072	141.59	184	0.73378	149.295	192	1.30095	132.148	176	0.931224	148.115	195	1.58327				128.262	161	0.644875
			141.508	198	1.11491				169.525	252	1.6682				125.557	166	0.823967	177.607	233	1.68693	157.098	187	0.974555	137.443	173	1.16875	142.869	188	1.33861				128.262	161	0.645044
			141.557	196	0.671461				127.328	169	0.612748				142.754	181	1.42296	151.918	189	1.42809	167.705	220	1.69301	137.738	177	1.20629	147.377	205	1.70423				128.279	162	0.645123
			141.803	186	0.996843				145.918	202	1.3718				123.902	159	0.965403	165.836	218	1.69682	165.754	207	1.25803	135.377	171	2.52517	134.508	168	1.35868				128.295	162	0.645176
			141.836	167	0.983205				150.525	190	1.04158				129.508	163	0.964036	159.098	198	1.25778	170.934	205	1.52489	140.639	175	0.880971	131.934	176	0.972554				128.295	162	0.645258
			141.885	183	1.44268				151.984	205	1.29783				134.279	173	0.759181	137.164	175	0.983125	153.426	200	1.06067	138.492	177	1.31577	142.082	180	1.54846				128.295	162	0.645791
			141.902	179	1.00832				135.541	174	0.860075				137.016	174	0.985341	167.426	220	1.76942	167.115	196	1.50047	139.377	173	1.01278	132.197	166	0.998995				128.311	162	0.646093
			141.967	189	1.01082				140.377	173	1.48912				138.918	170	0.973834	150.082	185	1.13542	162.77	224	1.35956	138.607	182	0.89085	148.148	204	1.18506				128.311	162	0.646347
			141.984	188	0.858897				142.049	178	1.26561				149.852	195	1.42849	140.639	174	1.0311	147.098	185	0.701055	146.459	194	1.21166	166.77	217	1.5562				128.311	162	0.646357
			142.082	187	0.570678				144.607	181	1.09848				130.607	167	0.982738	149.541	199	1.23407	161.475	217	0.952137	145.656	200	1.23613	142.18	193	1.32983				128.328	162	0.646443
			142.098	170	0.809318				137.18	176	0.821447				123.869	149	0.865668	164.705	209	1.35924	158.672	191	0.85972	143.836	179	1.19029	145.984	177	1.00785				128.344	162	0.646681
			142.098	202	0.745609				144.295	172	1.35172				127.492	159	0.894735	154.344	208	1.16993	159.262	198	1.18797	145.262	183	1.38552	170.984	227	1.81318				128.361	162	0.647211
			142.18	176	0.648491				135.82	171	1.04219				126.705	163	0.824405	149.131	179	0.698902	143.115	191	1.09655	162.951	216	2.09938	169.295	215	1.64057				128.377	162	0.647246
			142.18	186	0.646347				135.475	160	0.885725				150.328	216	1.58729	171.508	222	1.74566	141.131	179	0.825426	137.934	174	1.19761	144.459	185	1.73704				128.41	162	0.647373
			142.213	176	1.11657				133	178	0.879539				133.23	188	0.81897	157.689	210	1.15839	156.328	228	0.766465	143.197	199	1.29265	164.705	226	1.56483				128.426	162	0.647669
			142.213	174	0.893044				144.049	204	1.12944				144.672	181	1.29237	140.164	205	0.667519	144.148	196	0.960811	142.59	186	1.04264	152.902	197	1.31195				128.443	162	0.64778
			142.262	176	0.939558				134.311	174	0.796874				150.754	190	1.33814	191.279	250	1.87942	151.918	190	0.749076	142.934	195	1.0022	146.77	192	0.773953				128.443	162	0.647795
			142.344	181	0.710056				146.984	189	1.10926				142.852	179	1.56464	171.279	219	1.63224	153.885	189	0.827901	144.328	198	1.44672	155.41	204	1.68829				128.557	162	0.6478
			142.361	178	0.601556				145.344	182	1.35742				132.525	171	1.03431	134	175	1.5196	171.098	214	1.55406	132.41	172	0.724481	153.656	205	1.48382				128.557	162	0.648238
			142.377	174	0.813989				142.721	186	1.32112				125.721	163	0.623939	148.82	180	1.56183	147.033	186	1.40035	144.426	192	1.20751	162.639	200	1.34718				128.574	162	0.648269
			142.393	172	0.773389				134.656	175	0.893926				122.41	143	0.626207	167.262	216	1.50675	153.393	197	1.4083	129.311	163	0.937208	140.049	184	0.834043				128.574	162	0.648491
			142.443	184	1.00107				149.525	179	1.61374				139.393	174	0.973235	147.475	189	0.954211	134.328	168	1.37042	155.443	214	1.59672	162.393	220	1.65292				128.59	162	0.648554
			142.443	175	1.29221				150.082	197	1.31028				140.754	184	0.928055	169.197	236	1.43988	151.098	198	1.43211	151.246	196	1.4676	169.639	209	1.94152				128.59	162	0.648742
			142.508	177	1.12296				154.213	196	1.4674				130.951	182	0.689648	157.328	191	1.05083	150.344	183	0.874925	140.164	177	1.45836	134.59	175	0.821009				128.59	162	0.648922
			142.557	190	0.702839				171.115	227	2.181				137.672	181	1.34423	156.393	199	1.38762	156.852	203	1.33844	159.852	210	1.45828	150.033	190	0.789394				128.59	162	0.649887
			142.59	174	1.09761				150.246	200	1.29697				133.049	171	1.04406	166.574	225	1.5467	153.148	228	1.58777	137.311	170	0.926698	175.459	226	1.85147				128.623	162	0.6499
			142.607	180	0.910208				149.279	183	1.2858				152.721	201	1.51021	146.328	181	1.14084	148.492	211	1.03118	157.082	208	1.06244	170.082	223	1.78913				128.623	162	0.649966
			142.639	188	1.32147				158.41	209	1.49925				127.41	171	0.858073	150.656	187	1.13324	149.607	185	1.58612	135.902	175	1.06679	149.443	182	1.34176				128.623	162	0.650016
			142.689	176	0.565923				151.262	202	1.45048				126.164	170	0.74066	154.443	196	1.03604	146.246	202	0.937194	139.885	179	0.92693	143.738	184	1.16911				128.639	162	0.650441
			142.754	191	0.946466				128.033	170	0.51789				128.656	164	0.773292	170.213	222	1.51855	148.066	180	0.892065	150.016	192	1.08772	151.131	183	1.70882				128.639	162	0.650654
			142.803	190	0.707512				151.311	223	1.23212				131.803	174	0.673146	151.902	199	1.0538	149.59	187	0.940957	172.033	219	1.82858	151.59	194	1.10833				128.656	162	0.651487
			142.836	179	1.02685				132.443	170	0.900691				135.082	180	0.705662	146.754	180	0.881056	153	204	1.03837	156.82	196	1.31229	150.475	184	1.45357				128.672	162	0.6517
			142.934	192	0.549373				135.279	167	0.779428				124.705	152	0.969833				146.508	199	0.782321	155.607	193	1.25394	149.443	208	1.21968				128.689	162	0.652259
			142.934	175	1.48592				150.738	220	1.08531				141.902	173	1.32174				148.164	188	1.06907	157.787	198	0.911315	149.967	189	1.42613				128.705	162	0.652448
			142.951	174	0.565082				152.852	196	1.43266				132.82	169	0.68815				139.656	174	0.777396	150.213	195	0.963235	145.066	184	0.865747				128.738	162	0.652959
			142.984	191	0.897006				143.279	198	1.10419				141.656	186	1.42496				164.295	211	1.05899	145.623	179	0.954215	180.852	236	1.83036				128.77	162	0.65306
			143.033	192	1.30883				143.59	185	0.862003				121.525	158	0.995044				134.082	182	0.870433	164.164	216	1.09182	144.361	182	1.28504				128.77	162	0.653231
			143.033	189	0.870376				144.918	186	1.14484				123	150	0.634126				157.984	218	1.56619	137.033	179	1.32013	142.475	181	1.02857				128.77	162	0.653934
			143.049	181	0.813073				156.656	202	1.30023				127.869	171	0.624444				140.148	184	1.12821	138.557	173	1.00078	154.131	200	0.907536				128.77	162	0.656024
			143.049	174	0.880532				147.41	180	1.3688				125.656	156	0.548725				144.607	186	1.20848	143.148	181	1.05066	146.066	183	0.988716				128.836	162	0.656041
			143.049	178	0.693622				139.951	171	0.878275				128.016	169	0.743578				152.902	208	1.31741	143.328	180	1.43433	164.967	211	1.75608				128.869	162	0.656092
			143.279	191	1.40894				169.525	241	1.62249				133.508	181	0.572341				138.426	165	1.36049	141.869	205	1.02538	170.361	208	0.815366				128.869	162	0.656115
			143.361	173	1.14449				154.656	200	1.17286				135.623	186	0.647246				141.852	197	0.93638	134.934	170	0.737409	139.557	178	1.22015				128.869	162	0.656294
			143.361	189	0.841279				180.557	249	1.6671				125.623	168	0.481393				143.033	186	0.999347	133.262	194	0.836713	164.213	223	1.16624				128.869	162	0.656437
			143.361	177	1.08222				149.246	200	1.13212				131.148	155	0.588331				141.607	178	1.00686	143.803	187	1.17873	158.164	203	1.09047				128.902	162	0.656917
			143.426	188	0.649966				171.393	210	1.03158				132.721	175	0.917321				144.377	186	0.912485	154	198	1.725	166.475	214	1.04113				128.902	162	0.656935
			143.443	178	0.526609				142.262	187	0.827912				128.262	160	0.952348				148.984	188	0.871444	144.836	186	0.900212	139.131	185	0.896108				128.918	162	0.657098
			143.508	175	1.27279				136.918	172	1.03833				133.115	171	0.610843				135.475	167	1.09075	135.902	162	0.972923	160.131	206	1.05427				128.967	162	0.657301
			143.59	171	1.7565				166.738	215	1.40726				130.295	156	2.64803				151.885	186	1.51211	143.508	186	1.30197	157.82	206	1.67086				128.984	162	0.657579
			143.705	187	1.65003				151.492	184	1.2205				137.984	182	0.999077				157.459	202	1.17762	143.115	177	1.05036	139.295	173	0.853838				128.984	162	0.657752
			143.721	191	1.1854				175.148	241	1.41829				129.033	162	0.505631				147.77	189	0.536404	143.803	170	1.01873	142.426	177	1.28177				129	162	0.658322
			143.885	181	0.937939				165.082	212	1.65694				132.721	177	0.761526				141.033	165	1.05143	141.475	198	0.849391	149.951	186	1.40504				129.016	163	0.658416
			143.918	192	1.45027				150.852	202	0.704832				123.738	162	0.484228				136.754	180	0.927232	153.984	200	1.45773	197.066	258	2.07945				129.016	163	0.658437
			143.934	192	0.854312				139.066	170	1.08761				125.459	167	0.54836				145.098	194	1.10833	165.787	222	1.71931	151.754	196	1.2884				129.033	163	0.659215
			143.934	171	0.923979				137.475	163	1.01183				132.361	163	1.1189				164.18	206	1.41798	155	199	1.08292	141.984	182	0.894925				129.033	163	0.659283
			143.967	183	0.99278				159.852	218	1.51036				126.246	170	0.771859				143.377	198	0.974869	203.852	325	1.84188	155.721	198	1.00014				129.033	163	0.659417
			144	166	0.97626				182.279	281	1.62904				129.393	169	0.74806				152.262	196	0.769449	156.918	223	1.4819	169.803	203	0.94392				129.082	163	0.659739
			144.033	198	0.76198				159.23	213	1.10773				128.23	166	0.700527				146.426	199	1.16397	143.852	189	1.22387	165.918	223	2.03836				129.082	163	0.660061
			144.082	178	1.54504				151.016	191	1.36777				115.639	140	0.886289				140.197	177	1.31916	134.885	173	0.836726	148.836	205	1.14393				129.098	163	0.660298
			144.098	192	1.36636				164.77	212	1.56706				122.639	150	0.890539				150.738	212	0.758709	158.393	202	1.60203	142.59	181	0.822103				129.098	163	0.660634
			144.115	176	0.823744				132.148	155	0.833925				132.525	159	1.24437				149.689	177	0.758947	145.066	181	1.09726	148.984	225	1.44455				129.115	163	0.660696
			144.131	180	0.661905				146.426	174	1.05711				129.344	163	0.789826				135.885	165	0.976269	168.541	240	1.61445	131.82	174	0.917667				129.131	163	0.661905
			144.197	179	0.911769				157.902	193	1.37516				122.246	155	0.584356				142.738	179	0.765253	160.361	221	1.56946	142.836	174	1.2027				129.131	163	0.662234
			144.23	187	1.34513				177.41	229	1.59035				122.148	143	0.887397				136.852	168	0.859914	150.689	178	1.25962	140.262	191	0.962505				129.164	163	0.66237
			144.23	184	0.906657				146.131	188	0.967847				126.475	153	0.9461				145.377	182	1.25211	154.311	225	1.32844	140.016	184	0.665052				129.18	163	0.662441
			144.295	174	0.993761				146.066	188	1.3836				155.689	189	1.86285				157.082	202	1.40567	151.508	197	1.16224	162.623	257	1.46102				129.18	163	0.66257
			144.295	187	1.09108				145.115	198	1.18536				125.115	152	0.986453				148.77	184	0.95465	151.852	197	1.46279	153.475	216	1.73391				129.18	163	0.662988
			144.344	188	0.636887				148.459	197	1.30063				122.803	162	0.968421				166.443	213	1.4175	141.754	208	1.12736	142.639	180	1.14425				129.18	163	0.664178
			144.459	186	0.972668				144.574	200	0.828061				129.59	162	0.785252				160.656	207	1.67182	143.525	189	0.962785	141.049	176	0.911668				129.213	163	0.664446
			144.541	177	1.20961				155.508	199	1.47774				144.672	178	1.26081				138.705	164	0.982095	159.656	203	1.92627	137.361	173	1.4039				129.213	163	0.664508
			144.541	175	1.02651				146.951	190	0.921529				127.148	162	0.977148				149.656	188	1.42211	136.016	178	1.03666	147.066	192	1.03106				129.246	163	0.664597
			144.574	177	1.10941				146.115	187	0.950301				125.623	149	1.24459				148.623	198	1.42017	143.557	198	1.33349	174.148	206	1.58946				129.246	163	0.664715
			144.574	175	0.905018				139.803	177	0.830126				130.951	173	1.08465				130.852	160	0.861978	137.492	185	1.05067	138.131	175	1.17172				129.279	163	0.66492
			144.607	178	0.701318				154.721	195	1.73224				130.721	168	1.29606				140.328	210	1.19254	142.672	184	0.987749	138.426	187	0.745154				129.295	163	0.664981
			144.639	185	0.755633				141.689	171	1.0715				140.672	183	1.46993				144.82	195	1.26834	152.311	205	1.4173	148.049	194	1.40863				129.311	163	0.665052
			144.656	179	1.71093				143.18	218	1.21815				148.82	180	1.40531				134.41	169	0.873996	146.852	202	1.27847	137.197	169	1.20451				129.311	163	0.665175
			144.656	202	0.971793				160.656	210	1.1251				127.836	170	1.03613				141.459	180	1.21902	140.311	166	1.08934	143.311	193	1.47804				129.311	163	0.666126
			144.672	189	0.992535				164.082	237	1.45805				128.213	162	0.780674				135.803	168	0.934652	140.246	181	0.989655	153.426	191	1.99788				129.311	163	0.666341
			144.689	178	0.700468				174.787	246	1.72731				141.984	181	1.30419				129.623	162	0.827586	137.77	171	0.872277	136.721	176	0.945023				129.311	163	0.666942
			144.82	174	0.497353				147.23	205	0.981036				138.656	166	1.24673				141.197	178	0.984184	143.77	184	1.44296	132.934	168	0.853742				129.328	163	0.667519
			144.885	175	1.10225				144.754	189	0.956277				123.525	170	0.517386				133.066	162	1.09226	140.131	180	1.11852	148.607	184	1.66724				129.344	163	0.667663
			144.918	203	1.22936				150.574	195	1.0017				129.885	185	0.87089				148.475	184	1.34945	158.361	209	1.59692	145.754	176	1.19639				129.344	163	0.668143
			145.082	193	0.825528				167.918	218	1.62857				131.016	165	0.899144				140.279	177	1.3908	150.967	194	1.49349	152.066	186	1.24869				129.361	163	0.668213
			145.213	177	1.6745				163.459	208	1.57646				130.18	163	0.759942				129.311	159	0.850676	153.525	192	1.83527	144.508	183	1.57142				129.377	163	0.668309
			145.23	206	0.83243				138.213	177	0.855166				130.738	180	1.07746				144.639	203	0.889983	146.754	180	1.32143	151.262	194	1.09439				129.393	163	0.668854
			145.279	181	0.524644				173.361	221	1.65289				123.443	187	0.880134				130.508	161	0.861814	138.475	175	0.995626	173.361	221	1.50818				129.393	163	0.669289
			145.328	194	1.29326				149.852	190	1.04819				122.475	151	0.810171				151.541	186	1.54604	142.984	183	1.04207	141.197	177	0.771045				129.41	163	0.669383
			145.328	190	0.71546				146.525	185	1.09222				146.885	185	1.59943				156.984	210	1.61149	154.361	201	1.69311	161.689	208	1.903				129.426	163	0.669444
			145.426	197	0.652448				148.934	182	1.13007				118.541	154	0.669383				154.852	194	1.47787	171.311	249	1.66537	145.213	191	1.10379				129.426	163	0.669753
			145.525	187	1.09082				153.574	190	1.18332				146.098	214	1.49395				152.885	196	1.00534	148.016	201	1.45654	144.279	178	1.03064				129.443	163	0.67072
			145.525	185	0.947215				142	173	1.01897				140.639	186	1.48805				163.721	218	1.46833	152.852	193	1.69363	153.246	178	1.20089				129.443	163	0.670866
			145.672	200	1.30129				141.869	179	0.978289				124.525	155	0.833789				160.049	209	1.4151	135.738	181	0.961519	148.508	185	1.19663				129.475	163	0.671105
			145.721	184	0.611226				155.689	187	1.59158				132.197	163	1.08599				172.311	216	1.01723	138.082	187	1.05782	153.672	212	0.685839				129.475	163	0.671461
			145.836	174	0.918662				144.787	182	1.17295				137.361	168	1.34234				151.459	179	1.28416	146.066	197	1.36962	149.721	184	1.26612				129.508	163	0.672144
			145.852	182	1.31936				150.41	195	1.46762				141.295	184	1.20738				132.41	156	1.24582	179.279	230	1.86198	149.508	187	1.05374				129.525	163	0.672166
			145.902	184	0.858757				148.033	191	1.23979				122.492	146	0.749881				160.918	205	0.658437	138.639	174	1.40731	146.066	181	0.923142				129.574	163	0.67223
			145.902	190	1.1267				156.098	197	1.83193				130.689	167	1.17002				184.492	253	1.5344	130.246	173	0.930488	180.082	235	1.76316				129.59	163	0.672332
			145.918	187	0.919995				152.23	197	1.02942				153.033	198	1.82118				156.557	209	0.880832	161.115	210	1.39728	141.328	185	0.859553				129.607	163	0.672568
			146	190	1.22154				147.361	190	1.31681				147.066	188	1.75733				145.803	185	1.30619	142.311	206	0.819351	137.787	162	1.49749				129.607	163	0.672813
			146.033	180	0.437434				144.787	196	1.18758				128.59	157	1.3996				151.902	196	1.06636	167.984	219	1.28794	155.508	196	1.40271				129.607	163	0.672851
			146.082	182	1.04101				148.262	193	1.46247				114.049	150	0.634791				141.836	176	0.953008	139.607	175	1.0634	145.066	184	1.60535				129.623	163	0.673146
			146.197	171	0.624612				158.951	198	1.60099				119.918	145	1.02556				158.803	204	1.35828	148.557	191	0.732955	163.721	248	1.25293				129.623	163	0.673503
			146.213	180	0.861518				145.574	209	1.12683				142.934	195	1.20363				148.672	191	1.86398	150.148	198	1.29193	148.066	190	0.940938				129.656	163	0.67351
			146.311	180	0.916493				148.951	195	1.4049				117.869	142	0.645791				159.984	193	1.44759	134.475	172	0.774651	159	215	1.43321				129.689	163	0.674125
			146.328	182	0.937147				131.426	162	1.04544				130.262	162	0.9747				130.049	163	1.07347	140.541	169	0.911174	153.738	197	1.04597				129.705	163	0.674139
			146.344	189	0.694942				164.098	210	1.69182				126.623	159	0.980006				158.377	233	1.47054	151.328	195	1.54057	148.361	184	1.08018				129.705	164	0.674381
			146.344	177	1.01461				161.656	199	1.61396				126.852	169	0.797529				176.541	208	1.08373	141.557	180	0.810677	152.623	180	1.29691				129.705	164	0.674765
			146.361	185	0.881077				154.148	192	1.52815				119.016	147	1.03213				148.82	197	1.02218	136.262	187	0.927001	133.705	161	1.09367				129.721	164	0.674938
			146.393	189	0.900754				147.951	201	1.06207				126.984	158	1.14237				138.377	170	1.29489	135.361	170	0.758962	137.082	166	1.2081				129.738	164	0.67502
			146.459	191	0.645176				167.836	226	1.63982				130.426	159	1.49457				149.967	210	1.27055	131.557	175	0.761894	148.23	178	1.60647				129.77	164	0.675177
			146.541	180	0.727769				139.148	170	0.91335				124.869	174	1.03871				164.082	198	0.756059	142.984	177	1.08091	147.721	191	1.65987				129.803	164	0.675197
			146.574	181	0.856727				157.213	209	1.50012				125.639	169	1.28181				168.705	205	1.25995	145.361	179	1.15367	150.262	192	1.18562				129.803	164	0.67594
			146.672	201	1.47254				132.131	155	1.21365				121.787	163	1.09286				159.967	237	0.453288	136.295	193	1.02245	157.967	230	1.00359				129.803	164	0.676319
			146.705	190	1.51691				148.918	187	1.43902				138.164	185	1.46372				144.656	175	1.07213	151.23	221	1.42732	138.607	189	1.13712				129.803	164	0.676324
			146.721	190	0.846914				141.77	197	1.43005				128.049	157	0.730565				139.295	173	1.25845	131.082	165	1.18089							129.803	164	0.67647
			146.77	184	0.552257				133.508	174	0.693911				121.016	160	0.835139				137.557	179	1.1016	156.311	210	1.69543							129.82	164	0.676703
			146.803	192	0.530616				134.18	183	0.888424				131.852	175	1.13076				152.82	195	1.69393	136.705	183	0.98475							129.82	164	0.677528
			146.885	182	0.54793				127.066	148	1.00415				125.82	159	0.854038				175.41	225	1.25771	155.115	201	1.62541							129.82	164	0.677672
			147.033	191	1.58986				187.459	233	1.60741				146.508	195	1.56527				173.623	251	1.71369	137.902	174	1.07441							129.869	164	0.677677
			147.033	192	0.783493				166	234	1.90482				125.967	155	1.01214				145.164	199	0.498903	140.803	179	0.925524							129.885	164	0.678058
			147.049	186	1.48339				144.59	191	1.57519				122	146	0.904458				135.066	164	1.39142	146.475	191	1.11199							129.885	164	0.678176
			147.131	189	0.809082				139.508	180	1.22043				129.213	159	1.18131				178.295	232	1.91067	136.426	167	1.20177							129.902	164	0.678559
			147.148	180	1.39677				145.033	193	1.19143				125.475	165	1.01113				133.574	177	1.04709	137.951	176	1.21805							129.918	164	0.678673
			147.164	195	1.31727				135.115	192	1.06693				126.262	148	0.924579				148.213	206	1.21503	148.934	200	1.24136							129.918	164	0.679013
			147.164	179	1.07666				143.656	176	0.911636				127.443	158	0.86332				147.262	180	1.2857	148.311	210	1.32662							129.951	164	0.679051
			147.18	192	0.510837				141.525	186	0.69294				136.049	199	1.18822				151.426	188	1.37146	151.918	205	1.36988							129.967	164	0.679478
			147.18	181	0.781322				134.574	169	0.780388				123.197	152	1.23664				166.557	219	1.02446	154.246	207	1.59682							130	164	0.679661
			147.23	200	1.19117				138.197	175	0.680299				126.557	157	1.13995				163.836	195	1.84564	143.377	177	1.36601							130.049	164	0.679716
			147.246	183	1.55726				155.541	204	1.07969				148.852	181	1.6966				167.23	229	1.04396	158.754	196	1.6013							130.049	164	0.679719
			147.295	188	0.974117				160.426	204	1.17513				117.459	145	0.741452				193.213	248	1.71395	151.41	189	1.47639							130.049	164	0.679894
			147.311	179	0.590513				156.492	214	1.54883				125.705	160	0.864235				155.721	203	1.43026	149.197	193	1.19173							130.066	164	0.680299
			147.311	172	1.44291				139.787	199	0.911962				131.082	191	1.41568				174.361	241	0.92619	148.344	196	1.43412							130.066	164	0.68059
			147.361	188	0.650016				144.836	199	1.08361				132.721	167	1.23779				162.016	198	0.755439	136.541	168	0.866306							130.066	164	0.681591
			147.393	193	1.39536				138.607	170	1.09634				126.803	161	1.14032				154.574	193	1.17748	151.23	183	0.875581							130.082	164	0.681647
			147.41	195	0.66237				163.377	233	1.57061				129.705	166	1.19088				149.082	187	1.07306	176.311	221	1.60007							130.082	164	0.682405
			147.459	198	0.689457				146.967	183	1.38013				135.508	178	1.10809				134.689	160	1.12574	161.721	207	1.62951							130.082	164	0.682588
			147.475	190	1.47195				140.066	184	0.914696				126.557	160	0.788992				194.426	285	1.59767	144.656	182	1.2155							130.098	164	0.682874
			147.541	182	1.56473				141.557	171	0.886264				134.131	169	1.33051				147.951	182	0.917873	155.049	199	1.61508							130.131	164	0.683283
			147.541	181	0.901092				133.738	181	0.888995				124.016	156	0.895224				155.77	202	0.842281	144.361	181	1.58775							130.131	164	0.683329
			147.59	221	1.19691				148.738	187	1.40747				125.934	160	0.924746				152.918	201	1.06599	138.066	183	0.592812							130.131	164	0.683663
			147.607	205	0.608523				155.164	197	1.42722				133.098	169	0.951165				146.443	182	1.27721	130.967	162	1.19207							130.131	164	0.683774
			147.607	180	1.21899				133.607	176	0.989224				128.23	162	0.775536				162.082	206	0.97052	142	186	1.00673							130.148	164	0.683853
			147.656	186	0.757494				135.918	178	0.853048				135.607	178	1.27237				162.033	205	0.988905	134.41	184	1.05547							130.164	164	0.68393
			147.689	184	1.12069				151.77	188	1.46592				132.721	179	0.9481				158.492	207	1.22752	150.525	189	1.06527							130.18	164	0.684894
			147.721	195	1.01058				171.279	229	1.6955				130.574	164	0.899679				161.82	213	1.12028	142.246	175	1.42084							130.197	164	0.685548
			147.77	176	0.788673				147.328	186	0.753883				124.607	163	0.730312				166.836	210	1.37957	143.361	188	1.06163							130.197	164	0.685839
			147.803	185	0.756269				134.049	171	1.23345				124.131	159	1.0547				146.508	176	1.0695	153.541	204	1.49477							130.213	164	0.685951
			147.82	183	0.66492				150.574	191	0.993638				128.902	150	1.11419				133.475	156	1.16389	135.951	176	0.940552							130.213	164	0.685994
			147.852	193	0.874299				141.164	176	1.20168				139.705	179	1.51794				150.59	177	1.12836	159.361	204	1.46313							130.23	164	0.686359
			147.918	189	0.963959				154.197	201	1.1528				135.393	199	1.18545				173.508	229	1.52276	156.148	199	1.41833							130.246	164	0.686427
			147.967	182	0.738761				146.787	193	1.01612				124.508	152	0.858073				158.393	214	1.49063	155.984	223	1.13441							130.246	164	0.686657
			147.984	179	1.03082				137.951	166	0.968496				131.197	177	0.8738				151.049	186	0.714078	147.541	184	0.922502							130.262	164	0.687251
			148.033	195	0.600129				139.525	174	1.1278				135.23	181	1.20976				171.377	225	1.56569	164.525	209	1.61314							130.262	165	0.68804
			148.033	183	0.948403				156	195	1.32893				138.951	171	1.4128				154.984	189	1.18743	152.246	225	1.20321							130.262	165	0.68815
			148.066	171	1.08054				157.098	205	1.25304				139.41	183	1.47218				146.295	187	1.50286	146.902	196	1.29309							130.279	165	0.688326
			148.066	193	1.29742				154.18	191	1.43066				135.59	165	1.07817				143.508	177	1.05874	146.836	194	0.902346							130.295	165	0.688395
			148.197	184	0.71215				142.115	182	1.06558				143.984	187	1.41404				139.295	180	1.05655	149.459	186	1.28417							130.295	165	0.689457
			148.197	206	1.1173				155.951	220	1.63074				132.656	164	0.711497				142.525	176	0.865177	140.951	178	0.888098							130.295	165	0.689633
			148.213	178	0.708458				143.607	171	1.07513				121.574	146	0.630827				164.59	222	1.34292	161.213	210	1.52924							130.295	165	0.689648
			148.23	179	1.60648				134.787	173	0.871996				145.82	185	1.45873				168.475	209	1.55032	169.623	221	1.59335							130.311	165	0.689957
			148.246	179	1.43896				137.197	168	1.07085				128.41	161	0.917216				160.098	224	0.87861	161.033	211	1.53571							130.344	165	0.689967
			148.279	224	1.4345				135	168	0.963866				140.492	189	1.34796				152.377	200	0.789478	164.803	240	1.49858							130.361	165	0.690131
			148.295	175	1.57399				177.443	240	1.71674				147.754	203	1.47869				142.344	182	0.782002	149.902	195	1.13649							130.361	165	0.690316
			148.328	208	1.54734				139.803	178	1.00644				128.098	158	0.940462				144	186	0.875921	177.918	309	1.58502							130.377	165	0.690509
			148.393	190	0.879138				143.738	190	1.19273				146.361	178	1.67247				143.213	172	1.10979	161.295	199	1.92081							130.393	165	0.690561
			148.41	225	1.15582				147.279	190	1.4566				148.59	190	1.6655				141.869	174	1.23563	148.492	190	1.16984							130.393	165	0.691983
			148.426	192	0.805757				169.852	213	1.3162				155.41	198	1.72892				160.197	203	0.895726	180.885	261	1.72584							130.426	165	0.69234
			148.443	180	0.622448				172.131	217	1.56987				149.656	223	1.25624				133.016	177	0.95871	142.262	188	1.15842							130.426	165	0.69294
			148.492	196	0.744278				130.197	162	1.00203				128.328	161	1.08551				133.41	165	0.707059	142.934	191	0.842822							130.426	165	0.693004
			148.492	185	0.621666				138	187	0.703539				143.918	216	1.31393				149.098	193	0.743356	140.311	180	0.855094							130.443	165	0.693282
			148.525	200	1.38377				135.557	161	0.873092				137	161	0.764647				162.803	199	1.15183	146.246	188	1.17269							130.443	165	0.693398
			148.541	184	0.789349				132.459	169	1.04746				128.557	162	0.973427				142.098	181	0.781048	154.393	193	1.34406							130.443	165	0.69358
			148.557	190	1.07833				159.82	206	1.63578				126	153	0.772174				146.328	191	1.23267	142.623	175	1.21545							130.443	165	0.693622
			148.59	194	1.64815				142.918	172	1.58956				128.967	157	1.03997				139.23	182	0.924647	145.885	182	1.13744							130.459	165	0.693683
			148.656	175	0.78333				141.475	176	1.04906				136.41	166	1.44237				133.525	175	1.09568	149.475	202	1.33058							130.475	165	0.693911
			148.656	179	0.863242				134.148	170	0.582321				147.033	194	1.91781				152.869	193	1.1056	162.967	198	2.09095							130.475	165	0.694189
			148.836	198	0.945124				130.869	168	0.983435				127.557	161	0.873763				135.443	193	1.02258	154.443	193	1.40897							130.475	165	0.694253
			148.852	184	0.774005				153.41	197	1.73608				145.508	187	1.69581				156.803	190	0.69234	160.18	219	1.75435							130.492	165	0.694942
			148.885	186	1.08506				142.016	178	0.921533				133.738	167	0.950997				148.082	182	1.37208	154.754	196	1.33265							130.508	165	0.694958
			148.902	179	1.08563				160.787	206	1.70923				136.115	172	0.990654				148.754	211	0.736897	137.328	189	0.980568							130.508	165	0.694998
			148.918	199	0.759336				134.23	164	0.96069				123.016	154	0.823101				133.541	160	1.24522	156.574	191	1.33313							130.508	165	0.695308
			148.984	209	1.26138				138.131	172	1.36467				123.508	161	0.813859				144.082	185	1.23648	143	174	1.20361							130.525	165	0.695409
			149.016	191	0.865662				170.525	243	1.6079				128.705	164	1.30574				152.77	210	0.866807	143.344	172	1.00447							130.525	165	0.695531
			149.033	190	0.689633				140.443	178	0.841674				152.361	191	1.35775				141.623	184	0.653231	139.984	177	1.18919							130.525	165	0.695567
			149.131	189	0.656935				142.525	195	0.838795				135.607	165	1.36506				143.033	189	1.16982	152.23	202	1.29126							130.541	165	0.695879
			149.164	188	1.62945				147.066	189	0.975921				130.721	160	0.7841				139.639	175	0.983544	148.213	204	1.02374							130.557	165	0.696016
			149.213	190	0.76147				166	212	1.54803				139.393	177	1.32611				142.557	181	1.28281	151.115	193	1.55003							130.557	165	0.696096
			149.213	197	0.816086				160.361	200	1.41971				144.393	174	1.4267				186.705	252	1.89461	144.869	191	0.898351							130.574	165	0.696163
			149.246	206	1.09433				140.279	185	1.02456				142.443	191	1.53159				145.459	201	1.33715	179.82	234	1.63042							130.59	165	0.696402
			149.311	186	0.931671				153.148	187	1.31876				135.033	177	1.38093				138.738	175	1.12074	161.475	214	1.51781							130.607	165	0.696638
			149.311	198	0.882375				145.115	186	0.935265				149.328	190	1.5797				163.377	241	1.11171	136.262	176	0.80542							130.607	165	0.696925
			149.328	209	0.728021				159.705	205	1.60277				148.033	175	1.60843				167.656	228	1.15851	141.377	170	0.67647							130.623	165	0.697173
			149.393	189	0.753233				138.049	175	1.02249				128.869	176	0.989364				152.541	191	0.773776	158.803	204	1.46853							130.639	165	0.697618
			149.41	189	1.23667				132.672	167	0.821808				128.902	167	1.01326				155.049	184	1.18012	161.23	200	0.989802							130.639	165	0.698241
			149.77	210	0.822638				133.623	161	1.06056				132.344	159	0.569747				165.344	231	1.55658	143.23	186	1.18138							130.689	165	0.69838
			149.77	199	0.938596				152.525	197	1.51241				129.689	171	0.973171				171.574	227	1.29154	157.295	212	1.59788							130.689	165	0.698461
			149.836	186	1.34443				154.721	204	1.24295				137.557	171	1.37252				140.623	185	0.928123	147.246	185	1.19558							130.689	165	0.698695
			149.852	178	1.00073				137.246	167	1.06024				134.557	168	0.739187				132.164	157	1.05568	146.066	190	1.29128							130.705	165	0.698856
			149.967	183	0.844287				149.213	187	0.787495				121.295	154	0.6517				140.328	183	1.12845	149.213	203	1.27594							130.705	165	0.698902
			149.984	185	0.986096				142.475	172	1.00468				127.623	166	0.941966				129.033	175	0.553581	151.869	211	0.703431							130.721	165	0.69947
			150.164	192	1.38807				152.869	200	1.00858				124.197	155	0.571973				140.328	181	1.00417	145.426	182	1.16369							130.721	165	0.699675
			150.23	198	0.708889				152.738	214	0.962578				128.361	168	1.03928				141.18	177	0.842106	139.148	184	1.00816							130.738	165	0.699959
			150.262	191	0.734581				150.803	198	1.25223				141.918	183	1.34952				146.246	188	1.23695	177.738	212	1.89511							130.738	165	0.700468
			150.279	188	0.417219				161.098	215	1.5304				132.705	160	1.10172				146.295	177	0.979647	144.934	182	1.23762							130.738	165	0.700527
			150.328	206	1.06722				139.033	185	0.78293				128.77	165	0.79199				140.836	174	1.01451	159.41	261	1.29244							130.738	165	0.700997
			150.361	187	0.888418				145.41	193	0.862155				152.918	210	1.70668				151.344	204	1.04184	169.033	230	1.63112							130.787	165	0.701055
			150.393	211	1.06168				132.623	173	0.720034				134.279	173	1.23897				163.672	227	1.57869	136.41	184	0.925822							130.787	165	0.701318
			150.41	190	0.947863				165.689	228	1.62429				132.934	172	0.825182				154.148	209	1.47339	147.148	181	1.04906							130.803	165	0.702379
			150.426	182	0.962046				159.426	197	1.39278				126.574	161	0.925591				150.459	184	1.43953	143.754	173	0.885433							130.836	165	0.70243
			150.443	182	0.926528				152.459	201	1.33473				121.623	150	1.10149				149.607	185	1.29641	148.541	181	1.23244							130.852	166	0.702475
			150.443	189	1.10778				141.918	172	0.70243				140.689	176	1.78561				139.951	184	0.807903	176.738	222	2.26953							130.852	166	0.702515
			150.459	203	0.839342				135.066	159	0.982254				123.869	148	0.678673				144.607	179	1.2058	144.623	194	1.11413							130.852	166	0.702603
			150.475	195	0.57876				143.885	195	0.912277				125.098	165	1.06343				159.443	192	1.4638	138.131	173	1.24577							130.869	166	0.702839
			150.541	207	1.52277				152.115	210	1.2579				133.492	172	1.21268				163.607	206	1.18314	167.754	213	1.91578							130.885	166	0.703007
			150.557	188	0.643814				149.443	185	1.10691				125.967	160	0.704513				126.721	152	0.885744	150.23	204	1.02209							130.902	166	0.703189
			150.59	185	1.04217				132.754	164	0.871117				127.066	156	1.08947				144.721	173	1.33656	159.525	191	1.21372							130.918	166	0.703431
			150.59	199	1.58249				136.984	189	1.04517				122.787	149	0.764199				156.967	194	1.08716	140.164	182	0.946455							130.951	166	0.703507
			150.639	192	0.930493				153	192	1.19903				131	157	0.888866				135.738	178	1.05764	153.18	186	1.12311							130.951	166	0.703539
			150.672	186	1.94067				139.803	180	1.15528				140.77	175	1.60369				132.066	156	0.823447	141.475	204	1.00295							130.967	166	0.703855
			150.705	193	1.33571				145.295	172	1.02574				141.59	172	1.77495				133.689	168	0.849407	147.934	203	0.978293							130.967	166	0.703923
			150.77	184	1.03271				159.852	210	1.7062				135.033	169	1.21983				134.033	166	0.834587	152.475	188	1.78612							130.984	166	0.704513
			150.787	195	0.55436				154.541	201	1.73146				136.295	179	1.16266				133.607	178	0.768737	135.279	191	0.945273							130.984	166	0.704832
			150.836	185	0.835521				135.607	176	0.739295				158.852	217	1.77129				134.197	168	0.933397	151.918	180	1.19315							130.984	166	0.705522
			150.852	191	1.08592				149.541	200	1.1877				176.557	257	1.56614				139.508	183	0.706891	156.311	197	1.5393							131	166	0.705662
			150.885	201	0.982393				146.049	181	1.38298				132.148	187	0.906935				123.803	155	0.961293	136.656	172	0.894564							131	166	0.705996
			151.016	190	1.15087				173.689	226	1.54113				134.541	168	0.970746				134.311	158	1.12129	136.656	178	0.820364							131	166	0.706288
			151.016	199	1.06986				140.443	171	1.03241				123.213	168	0.851598				150.213	199	0.952771	146.492	183	1.40519							131.016	166	0.706579
			151.098	198	0.992701				166.951	215	1.37135				131.295	159	1.19575				141.164	176	1.1911	154.508	202	1.33374							131.016	166	0.706648
			151.131	195	0.924842				146.131	188	1.43247				136.869	172	1.03339				163.115	215	2.04866	146.377	200	0.827262							131.016	166	0.706891
			151.197	183	0.97312				134.148	161	0.570107				160.738	217	1.69616				151.492	187	1.2892	138.148	170	1.00719							131.033	166	0.707059
			151.23	194	0.859563				140.557	171	1.45779				118.934	149	0.695409				155.918	195	1.30587	136.049	177	1.28493							131.082	166	0.707234
			151.246	199	0.594647				143.246	181	1.20652				125.984	156	1.04247				139.82	196	0.767271	150.754	201	1.55004							131.082	166	0.707327
			151.361	193	0.933925				140.77	208	1.05373				142.885	186	1.51533				147.738	193	1.15998	150.066	191	1.45395							131.082	166	0.707491
			151.443	206	1.3075				138.885	177	0.848664				123.426	159	0.648554				141.049	179	0.943042	156.377	215	1.4825							131.098	166	0.707512
			151.459	194	1.14477				170.41	241	1.71349				127.869	165	1.10152				138.033	176	0.937816	151.41	185	1.39526							131.115	166	0.707716
			151.475	201	0.707327				162.705	200	1.2229				135.934	173	1.35018				134.934	170	1.04592	143.148	189	0.923394							131.148	166	0.707922
			151.525	189	0.986423				150.951	208	1.32058				133.918	174	1.274				132.82	176	1.07312	151.311	232	1.44057							131.148	166	0.708452
			151.656	180	1.07355				142.197	182	0.971557				124.492	156	1.17666				134.393	162	1.35507	150.852	206	0.860471							131.164	166	0.708458
			151.705	185	0.971404				131.213	165	0.748326				124.377	149	1.36782				146.672	178	1.18882	150.738	187	1.23243							131.164	166	0.708889
			151.754	196	1.59276				138.902	178	0.958281				110.508	162	1.7289				131.951	159	1.27205	148.803	197	0.808871							131.164	166	0.709561
			151.836	186	0.786221				169.59	241	1.58155				118.459	142	0.86748				140.016	180	0.974672	143.459	172	0.760319							131.164	166	0.710056
			151.918	201	0.697618				149.246	205	1.51123				116.361	144	0.814274				141.59	188	1.05511	140.066	174	0.923895							131.164	166	0.710083
			151.951	200	1.2444				165.098	200	1.33228				120.459	157	1.08134				132.475	165	1.28306	133.115	172	0.975544							131.18	166	0.710351
			151.984	192	0.936483				157.721	218	1.81205				124.967	155	1.51837				139.902	176	1.1789	149.328	193	1.34253							131.197	166	0.710493
			152.066	195	0.905439				143.656	184	1.41213				121.426	160	0.92086				142.459	183	1.01264	152.689	214	1.37143							131.197	166	0.711231
			152.098	180	1.13082				138.328	172	0.899147				124.525	168	1.18662				154.787	196	1.04685	148.852	208	1.23994							131.213	166	0.711281
			152.131	204	1.30315				141.672	183	1.17703				120.131	153	0.987404				164.705	202	1.32082	160.131	193	1.32444							131.213	166	0.711431
			152.131	190	1.49934				141.098	172	1.15864				126.787	163	1.08247				138.721	210	1.11565	157.607	192	1.34065							131.213	166	0.711497
			152.148	194	1.13967				138.623	171	0.73958				123.508	166	1.28854				146.754	174	1.27513	150.803	183	1.39534							131.213	166	0.711664
			152.213	195	1.05325				135.557	169	0.86329				121.016	158	0.910519				143.377	187	1.29181	159.475	222	1.24599							131.23	166	0.71215
			152.23	207	1.4187				144.672	178	0.851843				130.508	174	1.3584				128.59	176	0.639823	146.475	196	1.52212							131.23	166	0.712669
			152.23	191	0.621718				146.115	190	1.42553				127.393	156	1.01404				134.361	160	1.08604	163.672	208	1.68409							131.23	166	0.712822
			152.23	199	0.847072				144.852	173	0.883819				144.705	177	1.67718				135.131	168	1.1226	142.41	189	1.02622							131.246	166	0.71345
			152.262	192	0.935205				145.705	183	0.703855				131.459	177	0.682405				134.59	168	0.749595	148.131	176	1.57229							131.279	166	0.713943
			152.311	190	0.678176				154.262	200	1.10031				130.787	167	1.25825				131.459	155	1.12279	129.295	167	0.804909							131.295	166	0.714078
			152.328	202	1.2108				155.459	200	1.45321				125.393	148	0.909978				149.049	181	1.53234	145.508	198	1.40258							131.295	166	0.714087
			152.377	207	1.19603				139.902	180	1.35173				142.295	177	1.2468				138.721	170	0.934398	137.607	170	0.95664							131.344	166	0.714473
			152.393	192	0.567928				137.082	169	1.09012				129.803	156	0.791635				148.131	189	0.877786	134.328	164	1.31081							131.361	166	0.714746
			152.672	186	0.769249				137.721	172	1.02623				128.344	168	0.932265				137.164	185	0.970852	145.934	201	1.39605							131.361	166	0.714769
			152.803	193	0.983768				135.279	166	1.1011				137.443	171	0.743409				132.049	168	0.800089	135.508	167	0.644686							131.361	167	0.715102
			152.852	194	2.06871				140.82	191	1.35264				122.164	153	0.57996				134.426	161	0.953077	140.639	186	0.904891							131.377	167	0.715156
			152.852	198	1.37452				145.623	179	1.15529				124.689	173	0.696638				123.623	144	0.79276	145.82	183	1.09591							131.393	167	0.715364
			152.885	194	1.10458				135.311	173	1.00783				127.475	165	0.995855				131.689	171	0.963582	141.951	178	1.27453							131.393	167	0.71546
			153.148	181	1.31302				144.967	186	1.08749				124.984	157	1.18515				129.443	167	1.03558	150.557	201	1.55086							131.426	167	0.715509
			153.18	220	1.2849				133.246	196	1.11806				132.459	171	1.28284				129.344	160	1.19842	135.41	161	1.12563							131.459	167	0.715626
			153.197	187	1.66373				124.705	166	1.03834				143.754	182	1.61081				132.049	191	0.711664	149.049	176	1.46845							131.459	167	0.715629
			153.246	198	0.79847				141.066	182	1.37446				128.164	165	0.933893				159.098	199	1.98223	145.689	175	1.40051							131.459	167	0.716374
			153.262	187	0.989644				140.344	187	1.06627				135.492	186	0.60419				142.426	231	0.890633	146.41	208	1.18043							131.459	167	0.71673
			153.377	187	1.08092				151.377	195	1.3128				127.393	147	1.07141				131.508	168	1.09419	153.623	187	1.30375							131.459	167	0.716751
			153.475	204	0.90895				138.328	186	1.1241				136.082	168	0.942728				145.574	180	1.60172	144.508	182	1.23348							131.475	167	0.716813
			153.557	186	1.0518				135.836	159	0.955066				126.885	163	0.643037				141.525	178	1.06844	143.049	199	1.16959							131.508	167	0.71713
			153.59	189	0.9766				142.705	186	1.39469				147.115	190	1.31795				156.738	197	1.47742	153.525	210	1.48087							131.508	167	0.717482
			153.738	204	1.23481				142.426	189	1.41375				130.066	162	0.828272				151	202	1.2496	146.295	206	1.10361							131.508	167	0.718005
			153.803	189	1.51555				150.705	184	0.600458				133.525	176	0.95042				134.59	170	1.00189	169.623	228	1.53434							131.525	167	0.718797
			153.82	181	0.815906				154.279	200	1.559				138.23	185	1.08696				140.049	191	1.24132	159.574	223	1.17548							131.525	167	0.71888
			153.82	201	1.2796				168.279	215	0.68059				143.951	185	1.29672				149.148	199	1.07185	149.836	198	1.26701							131.541	167	0.718913
			153.852	197	0.619849				138.426	195	0.976615				129.311	177	0.928585				140.115	179	0.992604	163.426	218	1.4142							131.557	167	0.71899
			153.869	190	1.33731				141.393	210	1.26948				123.541	156	0.808405				138.311	172	0.875581	164.918	218	1.68965							131.574	167	0.719093
			154.148	187	0.824562				135.951	163	1.05424				129.393	170	0.754464				191.18	249	1.82024	150.41	183	1.1617							131.574	167	0.719185
			154.164	205	1.18367										135.836	172	0.967182				137.246	177	0.823354	150.607	190	1.36013							131.574	167	0.719338
			154.295	199	0.978615										131.803	173	1.00853				148.803	186	0.679661	213.951	288	2.15073							131.59	167	0.719657
			154.295	194	0.772484										125.311	158	0.917057				141.41	173	0.871841	147.59	188	1.03443							131.623	167	0.720034
			154.344	204	1.36334										124.393	156	0.89747				159.836	205	1.52177	147.213	183	1.07404							131.672	167	0.720269
			154.344	192	1.07378										137	171	1.10562				149.836	193	0.890123	142.311	181	0.864136							131.689	167	0.720385
			154.361	188	0.743777										125.787	165	0.79433				141.787	175	1.18367	139.557	172	0.748367							131.689	167	0.721345
			154.393	191	0.812005										129.525	172	0.934937				158.721	234	1.3327	174.508	214	1.7759							131.754	167	0.721478
			154.475	182	0.785574										122.475	163	0.759625				147.902	210	1.53881	151.934	195	1.37105							131.803	167	0.721587
			154.492	222	1.20183										128.639	161	0.925597				136.279	181	0.893669	155.525	224	1.45506							131.803	167	0.721784
			154.492	194	1.49203										133.754	187	0.740002				147.803	180	1.46827	158.787	202	1.27752							131.803	167	0.721988
			154.557	183	1.19459										131.984	170	0.995521				151.852	189	1.18826	149.279	186	1.17658							131.82	167	0.722309
			154.672	188	0.785125										127.41	166	0.790262				148.607	188	1.15174	158.492	198	1.39021							131.82	167	0.72249
			154.689	205	0.850034										123.508	162	0.59454				138.951	188	1.08764	151.951	204	0.946313							131.82	167	0.722568
			154.689	198	1.24009										133.426	165	1.55646				141.016	174	0.752304	144.738	187	1.16771							131.852	167	0.722879
			154.705	197	0.849105										153.803	194	1.77743				167.18	241	1.74002	177.639	233	1.59821							131.852	167	0.723067
			154.803	200	1.12158										130.689	158	1.06126				143.115	181	0.794191	149.59	195	0.884676							131.869	167	0.723298
			154.902	191	1.57348										129.016	165	1.01483				149.869	212	1.06083	152.656	191	1.14799							131.869	167	0.723799
			155.016	197	1.41432										133.328	167	0.870037				164.246	216	1.56605	154.754	197	1.22446							131.885	167	0.724277
			155.131	202	0.816907										133.18	180	1.10672				161.148	211	1.38057	155.361	198	0.955679							131.918	167	0.724481
			155.18	197	1.08588										146.279	180	1.37832				150.197	182	1.47749	146.492	197	0.718005							131.934	167	0.724612
			155.197	199	0.771675										133.607	177	1.24369				152.639	193	1.41224	144.262	196	0.845677							131.934	167	0.724723
			155.279	181	2.19983										132.689	186	0.975264				159.328	213	1.44772	163.951	241	1.72558							131.951	167	0.72518
			155.295	192	0.793035										130.197	161	0.851173				155.639	236	1.51975	143.951	188	1.07388							131.951	167	0.72557
			155.344	188	1.49298										137.279	178	1.49273				143.541	166	1.06657	171.262	214	1.85218							131.967	167	0.72622
			155.574	193	0.856289										129.18	167	0.750701				166.262	218	1.57461	146.049	183	1.24175							131.967	167	0.727259
			155.59	213	1.09632										128.115	170	0.716751				139.902	184	0.710493	145.049	175	1.30267							131.967	167	0.727769
			155.623	203	1.00033										132.098	174	0.707234				140.098	168	0.927091	141.016	183	0.955634							131.984	167	0.728021
			155.639	191	0.970133										125.426	169	0.598596				153.246	195	1.6673	155.902	191	1.21492							132.016	167	0.728251
			155.738	206	0.837789										125.066	154	0.799469				156.115	187	1.77273	153.984	206	1.54842							132.033	167	0.728552
			155.787	197	1.72423										136.115	187	1.28306				149.885	196	1.15413	146	191	1.02355							132.033	167	0.728956
			155.787	194	1.19396										136.279	167	1.17838				135.164	172	0.97146	175.328	231	1.47976							132.033	167	0.72906
			155.803	205	0.905394										138	185	0.988119				138.475	165	1.55708	150.525	212	0.758719							132.049	167	0.729083
			155.902	184	0.849047										134.115	181	1.13557				148.672	205	1.09707	144.705	177	0.906566							132.049	167	0.729135
			155.951	200	1.4543										129.82	162	0.94295				142.18	171	1.37277	160.295	197	1.18438							132.049	167	0.729414
			156.033	189	0.859157										128.049	181	0.938089				138.984	179	1.25245	148.311	209	1.13456							132.049	167	0.729851
			156.049	195	0.52184										123.377	159	0.738539				141.443	171	0.939027	163.426	214	1.50526							132.066	167	0.72986
			156.066	204	1.24107										130.131	164	0.84699				143.262	168	0.951954	166.77	210	1.67685							132.066	167	0.729985
			156.066	208	1.19361										147.459	198	1.29393				142.541	172	0.785363	137.738	170	0.729985							132.098	167	0.730025
			156.115	209	0.941782										126.623	160	0.648922				146.426	191	1.51694	147.639	184	1.04603							132.115	167	0.730312
			156.213	194	1.5419										139.689	185	1.33373				152.213	208	1.23277	138.525	178	0.660298							132.115	167	0.730565
			156.328	202	1.22878										130.279	161	0.990789				142	179	0.855227	157.41	198	1.74658							132.131	167	0.730575
			156.377	215	1.02065										141.115	180	1.46831				140.41	168	1.05565	145.984	176	0.797927							132.131	167	0.730617
			156.541	214	1.22555										131.148	166	1.03562				144.672	193	1.39461	151.213	186	1.27696							132.131	167	0.730807
			156.541	207	1.36395										156.885	210	1.65413				151.623	189	1.18963	154.475	191	1.43396							132.131	167	0.731007
			156.623	194	1.16029										134.475	175	0.830569				137.426	184	0.814391	154.361	199	1.56535							132.148	167	0.731079
			156.689	214	1.03555										152.033	204	1.58293				137.738	172	0.755588	144.705	188	1.04071							132.148	167	0.731124
			156.689	202	1.26254										133	167	1.18187				158.393	214	1.57097	156.951	203	1.2493							132.148	168	0.731231
			156.754	208	0.632087										135.311	167	1.47154				147.393	193	1.36767	196.623	281	2.06761							132.164	168	0.731249
			156.852	201	1.24438										139.246	190	0.989312				181.311	257	1.51322	172.738	213	1.18797							132.164	168	0.731439
			157	193	1.0269										136.738	179	0.970604				148.557	195	1.38972	146.721	225	0.68804							132.164	168	0.732255
			157.016	201	1.02204										128.77	167	0.597439				147.951	183	1.40451	174.492	220	1.28803							132.197	168	0.732376
			157.131	201	0.768059										137.705	176	0.656024				141.131	192	0.952111	143.656	179	0.824262							132.197	168	0.732951
			157.131	208	1.02972										134.869	176	0.596697				150.41	202	1.20135	141.787	172	1.14413							132.197	168	0.732955
			157.131	202	0.881858										148.967	199	1.36908				142.951	169	1.04179	153.754	196	1.40162							132.213	168	0.73369
			157.213	199	1.23116										147.016	201	1.43918				158.951	202	1.38976	176.607	247	1.50814							132.213	168	0.733764
			157.393	196	0.441215										128.836	161	0.811451				140.344	179	0.959142	157.066	209	1.41802							132.23	168	0.73378
			157.41	190	0.988273										141.066	179	1.19076				169.344	224	1.49253	148.279	191	0.920869							132.23	168	0.733944
			157.607	223	1.20338										129.475	180	0.652959				180.869	225	1.51116	149.279	181	1.44712							132.246	168	0.734147
			157.639	207	1.50135										136.18	164	0.912614				151.803	187	1.31531	146.836	198	1.16038							132.295	168	0.734264
			157.672	197	0.639685										135.459	187	1.15276				149.967	196	1.18153	171.967	216	1.5009							132.295	168	0.734514
			157.705	204	1.02399										130.213	172	0.982163				164.344	217	1.15647	141.541	179	0.504639							132.311	168	0.734581
			157.754	225	1.28345										156.23	203	1.37384				177.721	220	1.82605	152.164	209	0.899184							132.328	168	0.735439
			157.77	190	1.78325										142.656	204	1.19861				161.508	204	1.66247	145.885	194	1.09853							132.344	168	0.735505
			157.787	201	1.14243										130.738	174	0.890638				160.77	214	1.19609	194.656	270	1.83107							132.344	168	0.7357
			157.82	200	0.728251										130.262	165	1.00696				151.525	177	1.07851	144.311	177	0.958135							132.344	168	0.73614
			157.836	211	0.45324										140.705	177	1.33757				167.213	231	1.27658	150.738	183	1.0688							132.361	168	0.736897
			157.869	186	1.35938										147.213	188	1.5479				145.377	186	0.817485	171.033	212	1.67194							132.361	168	0.737204
			157.918	201	1.02323										146.18	200	1.39986				188.361	265	2.10191	149.984	194	0.777017							132.377	168	0.737409
			158.016	223	1.66281										129.033	165	0.866846				178.213	253	1.61051	148.131	186	1.03135							132.41	168	0.737656
			158.066	196	1.87582										156.508	215	1.61765				137.328	171	0.849455	143.049	181	1.12647							132.41	168	0.738539
			158.115	221	1.53142										158.508	225	1.48949				161.426	212	1.3216	152.77	194	1.06503							132.41	168	0.738583
			158.213	199	1.41453										148.738	207	1.39695				160.344	206	1.22663	149.148	190	0.867321							132.41	168	0.738598
			158.213	198	0.721478										133.443	180	0.887296				181.279	224	1.60544	157.459	198	1.38431							132.426	168	0.738761
			158.311	231	1.28906										136.951	182	1.13007				153.115	196	0.7686	157.016	198	1.37815							132.426	168	0.738846
			158.328	205	1.24268										140.016	184	1.37506				151.967	201	1.17929	152.77	234	1.03837							132.443	168	0.738863
			158.443	197	1.32031										149.41	204	1.38152				146.852	179	0.93941	159.918	222	1.34219							132.459	168	0.739187
			158.557	205	1.22373										128.443	165	0.80519				161.984	191	1.58683	166.164	210	1.92499							132.459	168	0.739295
			158.656	200	0.836547										137.557	177	0.974264				162.541	245	1.10975	157.049	190	1.56499							132.459	168	0.73958
			158.689	194	1.31129										128.623	170	0.784344				161.984	205	1.11163	149.525	198	1.01697							132.475	168	0.740002
			158.689	198	1.52094										127.049	161	0.73614				150.328	189	1.04292	161.164	205	1.45472							132.508	168	0.740044
			158.77	196	1.10804										145.426	191	0.835008				167.213	224	1.22159	140.639	187	0.923622							132.508	168	0.740257
			158.82	203	1.22289										153.311	195	1.33027				165.164	200	1.34287	154.115	191	1.42405							132.508	168	0.740343
			158.918	213	1.50248										142.934	198	1.05951				160.705	200	1.33797	155.82	230	1.56067							132.525	168	0.740443
			158.967	199	1.53397										149.295	190	1.55232				162.869	208	1.20051	144	182	1.25261							132.525	168	0.740605
			158.967	199	1.07767										145.557	185	1.47275				153.705	193	1.08297	146.59	198	1.32755							132.525	168	0.74066
			158.967	194	0.689957										148.23	188	0.900841				145.623	198	0.857592	177.607	228	1.85543							132.541	168	0.740789
			159.016	196	0.874388										172.328	221	1.95038				167.59	225	1.60074	171.803	232	1.55128							132.541	168	0.741017
			159.033	203	1.5518										127.393	155	0.821334				160.672	195	1.01635	182.328	255	1.73046							132.541	168	0.741452
			159.066	196	0.941172										174.016	260	1.69214				150.148	188	0.884743	156.836	195	1.64243							132.557	168	0.741573
			159.164	197	1.90384										143.279	179	1.33924				176.656	221	1.28937	159.197	196	0.938812							132.59	168	0.742568
			159.164	213	1.12756										137	163	1.5692				184.361	248	1.2177	148.246	180	1.82293							132.623	168	0.742603
			159.164	213	0.802881										141.279	202	1.05822				151.426	191	0.812488	148.984	187	1.34249							132.623	168	0.742832
			159.23	201	1.31422										152.836	212	1.37885				162.934	214	1.12505	154.066	203	1.12884							132.623	168	0.743032
			159.23	204	1.56553										139.328	176	1.26818				156.492	204	1.15066	152.869	219	1.17332							132.639	168	0.743284
			159.311	195	1.43548										127.23	174	0.878265				148.295	189	0.82404	148.311	194	1.5073							132.656	168	0.743356
			159.426	213	1.41442										143.328	193	1.31741				162.492	205	1.37281	154.295	203	1.29522							132.656	168	0.74337
			159.623	210	1.35437										140.246	172	0.956873				153.787	199	0.773505	144.066	188	0.803839							132.656	168	0.743409
			159.656	198	1.78728										130.59	166	1.05143				165.787	201	1.83683	153.689	222	1.45752							132.656	168	0.743475
			159.656	210	1.21485										160.082	204	1.60623				166.918	257	1.1846	153.656	194	1.5381							132.656	168	0.743578
			159.672	193	1.42735										129.18	162	0.74519				150.787	186	1.43308	155.344	205	1.20701							132.672	168	0.743777
			159.77	191	1.11446										126.852	167	0.730617				152.754	190	0.926651	143.164	173	1.17629							132.689	168	0.744226
			159.951	191	1.52693										124.77	155	0.689967				162.279	203	1.46867	168.033	215	1.83002							132.689	168	0.744278
			159.967	197	0.879008										125.131	154	0.74876				171.082	216	0.945132	154.656	221	1.35705							132.705	168	0.745154
			160.082	218	1.62515										140.902	191	1.38997				190.82	243	1.90086	153.885	204	1.34883							132.705	168	0.74519
			160.262	214	1.08685										142.639	178	1.34008				162.049	207	1.26529	142.885	184	0.985672							132.705	168	0.745248
			160.344	223	1.13559										131.23	159	0.810942				166.607	220	1.30622	165.721	215	1.40934							132.721	168	0.745609
			160.393	212	1.21052										129.18	178	0.747068				197.803	278	1.82642	160.951	240	1.31643							132.721	168	0.745854
			160.426	218	1.23889										135.279	187	1.26487				160.984	207	1.28594	136.148	181	0.713943							132.721	168	0.745968
			160.508	198	1.25657										138.869	173	0.824451				167.23	235	1.58905	139.656	181	0.896834							132.721	168	0.746237
			160.902	216	1.14131										137.361	174	1.2503				164.443	206	0.469362	144.328	192	0.682874							132.721	168	0.746305
			160.934	204	1.09795										128.311	159	0.854578				150.492	198	0.656437	145.885	186	1.47331							132.738	168	0.746596
			160.951	208	1.3457										140.328	181	1.25625				164.492	213	0.971627	144.328	192	0.850815							132.738	169	0.746806
			160.951	215	0.863327										132.328	167	1.01661				162.77	215	1.43513	152.295	199	1.37063							132.754	169	0.746831
			160.967	206	1.11561										144.82	199	1.35049				172.475	224	1.57132	161.18	202	1.27035							132.77	169	0.747068
			161.18	206	1.07326										156.852	212	1.76348				155.885	200	1.33238	135.492	166	0.719093							132.787	169	0.748004
			161.361	210	1.39266										137.213	186	0.95587				154.082	208	0.750159	164.049	229	1.46865							132.82	169	0.74806
			161.426	224	1.53382										143.033	179	1.41525				158.902	213	1.05898	148.967	190	0.67351							132.82	169	0.74831
			161.459	206	0.955232										135.82	178	1.10432				151.131	205	1.27135	151.738	198	1.44649							132.836	169	0.748326
			161.557	201	1.06722										144.951	196	1.29291				177.443	235	1.27949	158.131	202	1.68081							132.836	169	0.748367
			161.574	206	0.852165										132.623	169	1.0736				131.18	163	0.721587	161.262	200	1.19392							132.836	169	0.74852
			161.607	197	0.870806										127.131	162	0.756587				147.262	176	1.13419	157.59	192	1.46119							132.852	169	0.748531
			161.82	211	1.0353										159.41	220	1.81423				162.246	213	1.37871	149.787	217	1.18611							132.869	169	0.74876
			162	210	1.11319										146.934	195	1.59142				150.721	204	0.998159	186.721	237	1.97967							132.885	169	0.748764
			162.41	196	1.16137										126.443	160	0.81398				145.213	186	0.620807	141.656	189	0.602711							132.918	169	0.749076
			162.459	217	1.13597										134.016	188	0.626165				163.672	200	1.59954	159.328	208	1.01076							132.934	169	0.749145
			162.541	202	0.931043										137.492	176	0.885742				167.787	231	1.71177	156.197	212	0.949181							132.934	169	0.749284
			162.656	212	1.35164										133.049	168	0.875471				140.639	179	0.674765	167.443	216	1.05928							132.934	169	0.749595
			162.754	223	1.53309										141.279	172	1.37587				153.295	189	1.03925	157.557	199	1.27471							132.951	169	0.749881
			162.787	209	1.25044										134.066	175	0.93003				173.18	217	2.02478	177.393	246	0.519071							132.951	169	0.749898
			162.803	200	0.597019										134.475	175	0.60183				154.328	211	1.31159	199.541	268	1.68935							132.984	169	0.750159
			162.852	199	1.51761										162.197	246	1.48214				153.689	190	0.975033	171.197	211	1.11344							133	169	0.750294
			163.049	205	1.22672										143.639	180	1.0474				155.852	206	1.02812	164.525	206	1.9821							133	169	0.750701
			163.066	213	1.157										129.574	177	0.90559				130.082	164	0.765277	156.131	199	1.20355							133.016	169	0.750705
			163.18	211	0.870073										130.639	172	0.554994				145.246	184	0.825159	136.951	179	0.794493							133.016	169	0.750716
			163.246	211	1.59811										144.393	191	1.34404				153.131	191	1.12218	150.639	182	1.35498							133.049	169	0.750934
			163.295	223	1.25301										145.967	185	1.4499				155.656	202	1.00062	150.705	205	1.24722							133.049	169	0.751132
			163.295	215	1.16779										161.459	213	1.87015				162.639	207	1.42403	151.459	196	0.694253							133.049	169	0.751173
			163.311	219	1.19484										150.279	198	1.17556				152.623	200	1.25784	154.77	189	1.47048							133.049	169	0.751215
			163.311	206	1.0745										128.23	164	0.913737				165.525	246	1.40763	149.623	190	1.0945							133.066	169	0.751349
			163.656	219	0.866996										132.59	174	0.643073				150.279	193	1.02058	148.213	187	0.896368							133.066	169	0.751828
			163.656	200	0.589583										126.066	153	1.11179				146.246	192	0.890809	149.672	197	1.08826							133.098	169	0.752304
			163.77	204	1.42541										127.328	157	1.2448				137.033	173	1.21107	142.131	176	0.918254							133.098	169	0.752724
			163.869	224	0.664508										149.82	193	1.4808				137.033	170	0.936275	136.951	177	0.711281							133.115	169	0.752877
			164.016	226	1.43927										135.164	163	0.82797				165.852	217	1.09449	151.803	193	0.870119							133.115	169	0.753233
			164.148	208	1.57713										140.213	184	1.16346				158.623	205	1.40712	147.098	197	1.00029							133.115	169	0.753642
			164.164	207	1.49227										134.967	171	0.777631				157.508	201	1.66339	173.508	215	1.71131							133.131	169	0.753776
			164.213	206	1.08044										133.361	172	0.575157				175.59	241	1.45557	151.689	201	1.03457							133.148	169	0.753883
			164.443	205	0.952386										123.672	160	0.750716				138.033	177	1.04031	161.705	204	1.05128							133.148	169	0.754464
			164.623	200	1.0698										134.918	180	1.02608				186.41	241	2.20002	165	218	1.43403							133.164	169	0.7547
			164.721	207	1.56193										141.754	182	1.78122				140.967	175	0.858217	168.443	228	1.47958							133.18	169	0.755412
			164.918	197	1.03348										144.738	186	1.33573				148.852	213	1.0102	172.361	228	1.61354							133.18	169	0.755439
			164.918	221	1.36796										133.82	163	1.31165				142.443	186	1.10269	149.098	198	0.964352							133.197	169	0.755446
			164.951	217	1.45093										126.328	150	0.787743				162.672	221	1.26895	172.377	218	1.76144							133.213	169	0.755588
			165.082	207	0.731249										128.311	163	1.11793				151.77	197	1.28596	162.574	218	1.64291							133.213	169	0.755633
			165.328	197	1.90098										136.508	176	0.962934				153.803	208	1.13408	178.148	222	1.71173							133.23	169	0.755766
			165.344	222	1.40098										169.918	210	1.54203				147.459	183	1.16731	138.361	183	0.946063							133.246	169	0.755913
			165.541	199	1.31163										151.607	199	1.54166				153.426	190	1.40885	140.508	172	0.985469							133.246	169	0.755969
			165.59	204	1.28513										148.934	201	1.38394				158.852	200	1.71451	161.049	229	0.916746							133.262	169	0.755989
			165.639	209	1.52698										135.525	190	1.02623				145.098	195	1.15409	160.115	214	1.53889							133.262	169	0.756059
			165.656	207	1.37631										130.852	174	0.355374				133.148	173	0.763052	153.77	219	0.85326							133.295	169	0.756203
			165.672	213	0.666341										139.262	173	1.23198				152.033	203	1.34075	146.18	192	1.01008							133.295	169	0.756269
			165.721	218	1.63187										148.295	188	1.28544				139.541	183	0.940446	146.656	193	1.15859							133.295	169	0.75641
			165.902	211	0.756203										122.836	160	0.902645				151.721	209	1.52652	139.82	171	0.908574							133.311	169	0.756555
			165.902	210	1.34675										153.984	195	1.35405				139.639	177	1.41884	150.18	187	1.08297							133.328	169	0.756587
			165.967	224	1.26917										146	195	1.02768				171.279	225	1.72693	152.311	194	1.44179							133.328	169	0.756717
			166.082	218	1.37114										141.066	174	1.40887				147.934	200	1.16479	154.574	201	1.12393							133.344	170	0.756784
			166.197	218	1.82199										143.311	185	1.40784				142.656	181	0.926717	138.082	168	1.20385							133.361	170	0.756864
			166.246	222	1.2355										147.574	191	1.39877				170.361	243	1.53523	164.377	214	1.18799							133.377	170	0.757494
			166.246	207	1.31447										141.246	177	1.11904				138.098	173	1.06878	143.869	183	1.14067							133.377	170	0.757621
			166.295	215	1.08827										137.131	177	1.09297				141.82	175	1.02955	169.197	200	1.58611							133.41	170	0.757727
			166.344	238	1.03566										145.705	201	1.48232				152.18	184	1.37229	141.016	185	1.10452							133.426	170	0.758683
			166.344	197	0.68393										140.016	203	1.25433				146.295	178	0.962433	150.033	195	1.26034							133.426	170	0.758709
			166.475	212	0.95043										133.197	168	1.08715				143.049	192	0.798848	149.082	192	1.18203							133.426	170	0.758719
			166.639	222	0.826624										138.656	173	1.07505				173.984	215	1.74586	171.918	220	1.75424							133.443	170	0.758947
			166.787	223	1.65017										131.164	178	0.755412				137.131	185	0.817174	137.623	174	1.04068							133.459	170	0.758962
			167.049	205	1.13367										133.098	183	0.811723				158.475	200	1.31609	149.049	182	1.93801							133.475	170	0.759181
			167.098	223	1.27171																144.574	194	0.717482	138.754	178	0.898192							133.492	170	0.759336
			167.492	227	1.28092																137.492	177	1.26023	134	170	0.850569							133.492	170	0.759496
			167.557	215	1.06218																141.852	190	1.3729	144	181	1.52438							133.508	170	0.759625
			167.623	221	1.98757																136.557	187	1.04207	150.803	202	1.40128							133.508	170	0.759848
			167.77	228	0.90824																138.607	187	1.27809	135	175	1.08185							133.508	170	0.759916
			168.492	216	1.63693																144.361	193	1.56329	181.082	238	1.39956							133.525	170	0.759942
			168.689	213	1.27343																144.016	195	1.48862	135.557	170	1.00962							133.525	170	0.76016
			168.803	219	1.26062																151.492	193	1.29998	167.967	234	1.80867							133.525	170	0.760199
			168.82	211	1.45933																139.918	173	1.26099	144.377	185	1.29849							133.541	170	0.760241
			169.361	217	1.62458																139.246	193	0.92197	149.705	198	1.30787							133.574	170	0.760319
			169.492	233	1.39413																137.082	180	1.24265	137.656	176	1.03327							133.607	170	0.760338
			169.508	224	1.51198																143.852	189	1.31644	151.689	194	1.07823							133.607	170	0.760723
			169.836	224	1.421																139.164	167	0.960708	139.148	183	1.09506							133.607	170	0.76073
			170.016	216	1.3894																139.295	172	1.28327	145.262	190	1.14632							133.607	170	0.760875
			170.23	218	1.41126																142.475	186	0.794099	150.443	220	1.20624							133.623	170	0.761195
			170.689	230	1.83463																152.59	198	1.21335	146.197	191	1.25514							133.639	170	0.76147
			170.705	236	1.50274																150.557	216	1.514	160.459	212	1.31189							133.656	170	0.761526
			171.066	232	1.03884																139.098	181	0.978199	141.41	174	1.14749							133.689	170	0.761617
			171.23	248	1.42958																134.607	167	1.00443	137.066	166	0.990624							133.689	170	0.761894
			171.328	210	1.54442																147.869	191	1.56533	143.311	205	1.16298							133.705	170	0.761976
			171.361	235	1.41245																143.475	187	0.903778	158.115	232	1.33304							133.721	170	0.76198
			171.393	229	1.42377																135.049	173	1.23595	142.934	180	1.34292							133.721	170	0.762095
			171.525	234	1.23053																140.377	181	1.07573	172.738	250	1.38851							133.721	170	0.762189
			171.623	213	1.5701																143.721	172	1.41138	183.836	240	1.95157							133.738	170	0.762959
			171.918	213	1.46834																140.541	175	0.996647	168.639	219	1.78564							133.738	170	0.763052
			172.098	222	1.33296																154.869	212	0.995606	150.984	199	1.29837							133.738	170	0.763179
			172.148	224	1.90155																138.033	177	1.09704	140.639	182	0.693004							133.738	170	0.763309
			172.197	204	1.24332																137.721	183	1.34637	157.41	208	1.37673							133.754	170	0.763569
			172.295	231	1.43547																174.639	225	2.0892	153.951	201	1.20908							133.754	170	0.764007
			172.377	219	0.943489																148.344	195	1.69659	172.082	233	1.63842							133.77	170	0.764199
			172.656	226	1.62408																146.902	185	1.26626	138.803	185	0.990696							133.803	170	0.76455
			173.066	230	1.24511																156.82	203	1.79831	152.098	200	1.30474							133.82	170	0.764647
			173.18	218	0.990992																143.754	181	0.987759	172.066	220	1.50906							133.836	170	0.764909
			173.377	224	1.43969																159.18	242	1.01195	140.016	170	0.867199							133.852	170	0.765167
			173.639	219	1.20767																146.934	175	1.36591	141.754	191	0.999815							133.869	170	0.765253
			173.967	243	1.66373																143.443	189	1.47824	161.279	204	1.45859							133.869	170	0.765277
			174.148	232	1.35008																147.492	190	1.034	158.951	211	1.67395							133.885	170	0.765774
			174.23	220	1.29484																154.426	203	1.2747	156.328	202	1.34075							133.902	170	0.766128
			174.311	229	1.42453																140.852	176	1.00697	140.705	178	1.05562							133.918	170	0.766465
			174.705	230	1.08559																172.656	230	1.52171	159.77	219	1.50751							133.934	170	0.766908
			175.033	225	1.38173																138.492	174	0.989327	159.738	206	1.42225							133.934	170	0.76723
			175.508	225	1.2142																155.885	205	0.827868	151.098	196	0.931786							133.967	170	0.767271
			175.918	229	1.11372																140.18	175	1.02592	143.23	181	1.28493							133.967	170	0.767323
			176.164	240	1.8386																143.705	189	0.782876	143.705	190	1.07177							133.967	170	0.767622
			176.23	228	1.52795																143.525	182	0.834245	153.082	205	1.28248							134	170	0.767637
			176.525	218	1.74572																147.279	199	1.19208	147.656	187	1.33624							134	170	0.767646
			176.541	221	1.39247																149.246	180	1.63394	162.459	237	1.35864							134	170	0.767941
			176.639	218	1.92724																153.607	186	1.64061	142.459	189	1.12251							134.016	170	0.768059
			176.803	238	1.21125																159.262	203	0.85105	149.475	186	1.42786							134.033	170	0.768255
			176.82	222	1.13468																155.033	197	1.30509	154.639	189	1.6292							134.049	170	0.768288
			176.885	243	1.54072																165.803	208	1.60819	159.41	197	0.881445							134.049	170	0.768356
			177.918	249	1.4055																164.033	224	1.49331	153.197	205	1.90921							134.066	170	0.7686
			178.311	229	0.960187																133.803	164	0.644512	175.869	220	1.80464							134.066	170	0.768719
			179.607	242	1.54717																150.295	201	1.07484	159.492	196	0.913161							134.082	170	0.768737
			179.836	230	1.71023																140.787	174	0.787526	170.59	245	1.5364							134.115	170	0.769018
			180.016	247	1.47313																147.066	181	0.988007	154.59	231	1.23743							134.115	170	0.769079
			180.082	245	1.09302																141.279	173	0.865251	145.41	199	0.992716							134.115	170	0.769249
			180.754	236	1.74887																151.557	201	1.0375	155.574	188	1.62635							134.131	170	0.769277
			180.869	233	1.91888																146.426	179	1.08395	150.885	190	1.02019							134.148	170	0.769449
			181.607	236	1.95879																144.262	177	1.2062	147.459	187	1.21852							134.148	170	0.769458
			182.164	246	1.80573																144.557	171	1.1146	168.377	219	1.31949							134.148	171	0.769664
			182.311	249	1.65938																139.23	173	1.11053	171.475	210	1.82005							134.164	171	0.770019
			183.066	243	1.86384																138.066	182	1.00974	159.803	202	1.7519							134.18	171	0.770615
			183.115	267	1.53705																160.377	220	1.33088	137.623	180	0.731124							134.18	171	0.770766
			183.18	231	1.56992																143.803	192	1.47212	149.738	182	1.13061							134.18	171	0.771045
			184	249	1.59397																154.18	189	0.940902	143.344	178	0.929724							134.18	171	0.771144
			185.148	244	1.41469																139.623	169	1.36358	157.295	224	0.959182							134.197	171	0.771675
			186.754	241	1.91246																168.557	206	1.05753	170.082	220	1.38417							134.23	171	0.771859
			188.508	238	1.90708																168.148	233	0.619743	148.295	180	1.22213							134.246	171	0.771925
			188.639	260	1.58738																169.59	238	0.97421	143.361	183	0.856369							134.246	171	0.772174
			189	254	1.97431																169	211	0.699675	147.721	186	0.973852							134.279	171	0.772395
			190.082	248	1.51814																165.82	204	0.740044	150.918	198	1.34713							134.279	171	0.772484
			198.869	260	1.81422																162.787	200	0.756864	152.787	209	0.797359							134.295	171	0.772641
			199.016	250	1.97273																179.803	277	1.02738	154.836	193	1.01829							134.295	171	0.772713
			213.852	313	1.72366																198.574	271	0.908193	154.23	188	0.770615							134.295	171	0.772778
			227.787	361	1.79007																159.361	231	0.786527	152.213	189	1.00449							134.311	171	0.772916
																					170.934	212	0.920724	155.279	197	1.27866							134.311	171	0.773119
																					172.328	208	1.02267	186.295	244	1.50775							134.311	171	0.773292
																					157.311	199	1.05874	159.607	192	0.961258							134.328	171	0.773389
																					159.082	190	0.916637	202.951	253	1.75568							134.328	171	0.773505
																					163.262	193	1.34321	166.311	238	0.657579							134.328	171	0.773632
																					167.279	208	1.00382	183.836	252	1.42995							134.361	171	0.773651
																					168.098	251	1.04832	170.082	221	1.11008							134.361	171	0.773776
																					170.656	227	0.989191	176.213	223	1.29204							134.361	171	0.773823
																					159.852	212	1.26068	168.164	204	0.882434							134.377	171	0.77392
																					178.672	219	1.17288	185.049	241	1.93307							134.377	171	0.773953
																					147.049	205	0.86031	149.639	207	1.39462							134.393	171	0.774005
																					167.049	224	1.49112	162.164	204	1.15883							134.393	171	0.774539
																					175.557	214	1.16736	180.18	238	1.69221							134.393	171	0.774651
																					176.164	229	0.923475	151.59	195	1.11522							134.41	171	0.774748
																					162.443	197	0.7547	135.77	170	0.826264							134.41	171	0.77487
																					170.295	211	1.1823	155.918	200	1.2536							134.41	171	0.774918
																					169.508	220	0.76723	179.066	240	1.52085							134.41	171	0.775203
																					205.262	261	1.42304	151.984	205	0.698241							134.41	171	0.775403
																					159.951	199	1.04823	163.016	218	1.37432							134.426	171	0.775536
																					141.279	174	0.976377	148.918	197	0.771925							134.426	171	0.775759
																					142.344	204	0.748531	165.623	219	0.954397							134.443	171	0.775772
																					147.787	197	1.08248	164	218	1.12175							134.443	171	0.776211
																					158.361	212	1.1761	158.541	209	1.5006							134.459	171	0.776371
																					150.803	194	0.864713	168.787	209	0.901364							134.475	171	0.776959
																					160.525	208	1.29583	154.869	188	1.32169							134.475	171	0.777017
																					146.098	184	0.930335	176.869	222	1.8749							134.475	171	0.777396
																					156.803	201	1.05339	150.262	198	0.837892							134.492	171	0.777631
																					151.016	188	1.08107	170.623	218	1.55175							134.492	171	0.777656
																					160.967	210	1.29551	144.869	179	1.09281							134.508	171	0.777738
																					152	204	1.0445	174.541	240	1.51547							134.508	171	0.777947
																					156.557	211	1.31059	159.689	217	1.02936							134.541	171	0.779021
																					154.738	189	1.06236	139.262	201	0.856956							134.541	171	0.779061
																					136.213	184	0.546176	150.623	194	1.02817							134.557	171	0.779232
																					164.049	235	1.09508	151.836	192	1.56029							134.557	171	0.779372
																					172.918	227	1.43105	168.525	229	1.48418							134.557	171	0.779428
																					156.607	195	1.45995	154.689	205	1.50033							134.574	171	0.779608
																					161.721	204	1.56422	169.164	220	1.53457							134.574	171	0.779724
																					150.508	188	0.783434	173.426	236	1.77108							134.574	171	0.780388
																					150.328	189	0.988727	148.328	182	0.750934							134.59	171	0.780483
																					155.426	204	1.1731	152.902	206	0.99919							134.59	171	0.780674
																					144.098	179	0.631296	152.951	198	1.07252							134.59	171	0.780692
																					152.393	209	0.900505	156.525	197	0.976663							134.59	171	0.780746
																					167.738	210	1.3286	159.869	208	1.63752							134.607	171	0.780844
																					155.721	204	0.795356	169.574	217	1.95661							134.656	171	0.781048
																					159.689	206	1.11524	136.361	183	0.720269							134.656	171	0.781276
																					151.984	199	0.940976	150.459	199	0.97953							134.672	171	0.781322
																					156.164	228	1.00272	137.754	171	0.865441							134.672	171	0.781666
																					169.328	222	1.40978	164.705	230	1.45295							134.689	171	0.782002
																					158.721	205	1.22298	149.016	191	1.00362							134.689	171	0.782251
																					146.049	197	0.707922	154.852	195	1.08214							134.705	171	0.782321
																					144.574	194	0.679719	159.607	213	1.09644							134.721	171	0.782494
																					144.803	187	0.591354	146.098	177	1.0256							134.738	171	0.782776
																					161.393	207	1.28822	154.459	197	0.942588							134.787	171	0.782851
																					153.787	191	0.983691	154.377	187	1.69735							134.787	171	0.782876
																					161.311	206	1.07334	136.951	177	0.695567							134.787	171	0.78293
																					173.361	210	1.46995	159.328	209	1.28679							134.82	171	0.78333
																					165.541	203	0.864164	143.344	182	1.20764							134.852	171	0.78333
																					149.754	183	0.71345	193.393	256	1.82762							134.869	171	0.783434
																					143.787	167	0.644875	172.656	248	1.58165							134.885	171	0.783493
																					162.984	212	1.56166	171.869	227	1.46246							134.885	171	0.783766
																					179.082	227	1.8332	158.41	202	1.13944							134.902	171	0.78379
																					144.967	208	0.91035	178.721	241	1.51802							134.902	171	0.783844
																					170.393	211	1.05277	153.426	194	1.02956							134.918	171	0.78402
																					163.443	203	1.57756	178.902	231	1.45655							134.918	171	0.7841
																					166.885	225	1.1337	157.803	196	1.74088							134.934	171	0.784309
																					159.689	209	0.779061	149.984	199	0.937413							134.934	171	0.784344
																					167.033	216	0.799204	144.721	193	0.808912							134.934	171	0.784788
																					167.951	223	1.41487	179.885	232	1.75217							134.951	171	0.784955
																					157.803	197	0.876932	145.361	193	1.24433							134.951	171	0.784955
																					168.803	221	0.994071	151.262	208	0.565259							134.967	171	0.785125
																					205.246	285	1.46414	163.443	206	1.76639							134.967	172	0.785182
																					169.344	205	1.33687	172.967	211	1.7125							134.967	172	0.785252
																					176.393	208	0.849913	146.164	180	1.1294							134.984	172	0.785363
																					171.475	216	1.03525	147.984	191	1.59227							135	172	0.785531
																					179.18	240	1.35369	193.344	259	1.85904							135	172	0.785574
																					172.148	205	1.15764	171.525	237	1.88786							135	172	0.785606
																					162.18	195	0.588198	159.131	235	1.28319							135	172	0.785665
																					178.77	236	1.11743	157.77	228	1.40008							135.033	172	0.785729
																					154.754	194	0.882994	155.951	195	1.1943							135.033	172	0.78577
																					175.361	233	1.0614	145.246	212	0.822146							135.049	172	0.785924
																					189.148	247	1.25413	147.361	203	1.2181							135.049	172	0.786221
																					185.787	251	1.2331	140.426	178	1.26994							135.049	172	0.786527
																					157.049	196	0.928608	131.246	165	0.767646							135.049	172	0.786894
																					175.41	227	1.07356	152.344	206	1.01077							135.066	172	0.786953
																					194.049	236	1.53068	136.426	171	0.76016							135.066	172	0.78731
																					192.656	255	1.1685	179.869	261	1.76451							135.066	172	0.787349
																					188.754	249	1.31213	151.213	189	1.70328							135.082	172	0.787495
																					186	255	1.57577	153.262	188	1.31967							135.098	172	0.787526
																					186.705	266	1.31152	152.492	182	1.21653							135.115	172	0.787743
																					191.541	246	1.71238	144.623	192	1.20748							135.131	172	0.787766
																					159.066	229	0.674139	142.033	193	1.2821							135.148	172	0.787897
																					164.082	194	0.647211	146.77	196	1.17604							135.148	172	0.787934
																					175.016	224	1.45149	151.852	203	1.33729							135.164	172	0.78809
																					164.443	200	1.11394	140.705	181	1.30044							135.164	172	0.788318
																					161.41	197	1.19776	162.443	210	1.24148							135.164	172	0.788599
																					175.213	248	1.19643	162.443	210	1.24148							135.164	172	0.788673
																					155	189	1.07941	150.869	189	1.70934							135.18	172	0.788992
																					159.574	197	0.995802	139.82	194	1.12673							135.197	172	0.789073
																					181.623	305	1.34368	140.295	212	0.780692							135.197	172	0.789349
																					150.574	181	1.09984	140.902	180	0.724612							135.197	172	0.789394
																					163.131	224	0.812538	163.541	223	1.83109							135.213	172	0.789478
																					148.803	184	1.0667	143.803	185	1.48861							135.23	172	0.789565
																					183.934	232	1.55758	134.049	170	1.11805							135.23	172	0.789826
																					144.033	179	0.949074	129.721	176	0.815219							135.23	172	0.789948
																					161.984	194	1.26511	139.639	186	1.39717							135.23	172	0.790199
																					151.787	201	1.0785	140.672	191	1.07877							135.262	172	0.790206
																					159.475	206	1.48513	136.213	187	1.12625							135.279	172	0.790262
																					164.246	205	0.97821	162.869	200	1.38997							135.279	172	0.790672
																					168.885	207	1.55572	154.852	195	1.47892							135.279	172	0.790768
																					184.967	255	1.45785	133.115	170	1.00315							135.279	172	0.790863
																					160.574	221	1.266	138.525	177	1.11394							135.279	172	0.790893
																					158.918	193	1.22164	159.049	202	1.67459							135.279	172	0.791075
																					150.885	185	0.942273	137.705	184	1.2585							135.279	172	0.791635
																					170.967	219	1.26902	144.426	175	1.46886							135.311	172	0.791756
																					149.295	179	0.780844	141.672	194	0.951454							135.311	172	0.79199
																					165.328	204	1.41778	147.164	190	1.66256							135.328	172	0.792529
																					167.852	227	1.5152	146.836	199	1.41704							135.344	172	0.792628
																					160.197	215	1.25471	138.131	173	0.773119							135.344	172	0.79276
																					167.59	222	1.52211	162.033	256	1.15589							135.361	172	0.792974
																					157.098	208	1.49939	140.689	191	0.98358							135.361	172	0.792981
																					167.033	199	1.46621	140.148	191	0.834032							135.361	172	0.793035
																					195.328	245	1.60787	138.459	195	1.04207							135.377	172	0.793349
																					160.639	198	1.08483	143.967	171	1.26806							135.377	172	0.793363
																					144.869	182	0.715509	143.869	182	1.00095							135.377	172	0.793749
																					142.951	187	0.824004	157.869	196	0.945221							135.393	172	0.793889
																					148.656	186	0.806547	161.869	211	1.40208							135.41	172	0.793974
																					149.574	203	0.735439	141.23	172	1.04489							135.41	172	0.794099
																					147.016	182	0.794817	150.869	183	0.962837							135.443	172	0.794178
																					166.393	239	1.3386	171.393	209	1.69474							135.459	172	0.794191
																					153.77	186	0.751215	136.541	184	0.928582							135.459	172	0.794258
																					185.098	242	1.69391	156.279	230	1.16252							135.459	172	0.79433
																					170.967	235	1.46097	135.377	177	0.741017							135.475	172	0.794493
																					146.738	178	1.30266	168.262	218	1.3592							135.475	172	0.794817
																					159.033	204	1.02624	147.361	193	1.3361							135.492	172	0.794856
																					156.541	194	1.15075	138.311	176	1.09585							135.492	172	0.795211
																					156.164	202	1.49339	141.672	188	1.26102							135.508	172	0.795295
																					159.049	210	0.719185	161.607	199	1.3924							135.508	172	0.795356
																					145.852	182	0.813119	148.393	184	1.40004							135.525	172	0.795417
																					174.41	214	1.97106	143.082	197	1.0391							135.525	172	0.796051
																					161.443	211	1.32103	150.262	201	1.37535							135.525	172	0.796072
																					146.148	177	0.873698	172.262	221	1.23665							135.525	172	0.79619
																					138.803	171	0.558398	154.525	193	1.52793							135.541	172	0.796268
																					166.836	225	1.11795	156.115	207	1.3615							135.557	172	0.796778
																					167.082	245	1.44307	136.574	167	1.03973							135.557	172	0.796874
																					163.262	202	1.20053	158.525	196	1.1058							135.557	172	0.796959
																					174.328	222	1.4843	181.951	268	1.60637							135.574	172	0.797014
																					148.967	183	1.01633	135.721	178	0.610718							135.574	172	0.797359
																					165.426	216	1.33165	146.459	182	0.945418							135.574	172	0.797529
																					185.623	245	1.7539	162.115	212	1.38959							135.59	172	0.797689
																					153.607	198	1.30114	151.557	201	0.950292							135.59	172	0.797726
																					146.934	180	0.839455	162.148	209	1.00697							135.607	172	0.797743
																					175.689	227	1.57388	161.721	221	1.73938							135.607	172	0.797876
																					149.213	196	1.37937	199.295	243	2.01114							135.607	172	0.797927
																					170.639	217	1.46896	165.836	221	1.56979							135.607	172	0.79794
																					153.787	185	1.42926	147.262	186	1.02846							135.623	172	0.79847
																					160.197	189	1.80327	168.311	205	1.60089							135.623	172	0.798848
																					159.623	195	1.23889	189.59	249	1.61525							135.623	173	0.799048
																					177.393	234	1.67742	164.852	232	1.36488							135.639	173	0.799204
																					144.852	177	0.707491	149.377	216	1.41712							135.639	173	0.799469
																					154.557	204	1.06384	157.77	196	1.05175							135.656	173	0.799503
																					166.164	207	1.69405	158.41	211	1.38742							135.672	173	0.800089
																					151.164	197	1.01213	155.574	197	1.10243							135.705	173	0.800363
																					166.492	223	1.35076	164.393	205	1.0935							135.705	173	0.800521
																					151.033	198	0.978188	163.689	200	1.24502							135.721	173	0.800785
																					149.393	214	0.6478	150.672	190	1.21809							135.721	173	0.801424
																					154.262	192	1.07407	143.574	182	0.850125							135.738	173	0.801603
																					139.098	166	0.827641	175.508	216	1.49612							135.738	173	0.801713
																					147.574	190	0.988907	166.049	214	1.26479							135.738	173	0.801943
																					150.475	193	0.527279	154.902	206	1.28662							135.738	173	0.802004
																					143.639	189	0.866282	144.902	171	1.41381							135.754	173	0.802881
																					153.623	233	1.31723	151.262	192	1.11622							135.77	173	0.803124
																					145.951	187	0.724723	147.934	183	0.929865							135.77	173	0.803277
																					163.344	226	1.14616	162.59	223	1.4139							135.77	173	0.803839
																					149.951	182	0.933118	175.541	232	1.78012							135.803	173	0.804289
																					161.574	210	1.25495	150.639	210	0.784955							135.803	173	0.804519
																					166.033	233	1.31406	180.885	248	2.00314							135.82	173	0.804612
																					155.672	192	0.966762	170.246	220	1.35978							135.82	173	0.804909
																					156.115	190	1.59177	148.459	203	1.20285							135.82	173	0.80519
																					148.164	173	1.33682	163.525	228	1.48019							135.82	173	0.805253
																					139.689	172	1.13102	184.377	235	1.84073							135.82	173	0.80542
																					134.393	176	1.04712	153.328	208	1.2481							135.836	173	0.805757
																					149.377	182	1.38659	160.623	207	1.20929							135.836	173	0.805837
																					160.77	234	1.64833	157.393	210	1.20554							135.836	173	0.806144
																					148.066	176	1.27928	157.557	197	1.11767							135.852	173	0.806547
																					143.672	201	0.770019	172.492	227	1.35658							135.852	173	0.806559
																					140.639	178	0.620256	148.328	180	0.816348							135.852	173	0.806973
																					140.41	180	0.839718	147.705	187	0.949111							135.852	173	0.807289
																					147.77	184	1.28739	169.852	221	1.72667							135.852	173	0.80767
																					139.689	180	1.41661	150.311	188	1.01141							135.869	173	0.807903
																					144.016	183	0.631873	150.852	203	0.676319							135.869	173	0.808362
																					143.541	207	0.82351	157.295	205	0.828385							135.885	173	0.808405
																					153.098	201	1.20247	146.852	210	0.779021							135.885	173	0.808488
																					145.393	178	1.24997	154.951	200	1.01047							135.902	173	0.808722
																					147.18	187	1.06209	163.869	222	1.53197							135.902	173	0.808871
																					150.656	196	1.46401	145.541	190	0.922584							135.902	173	0.808912
																					171.951	226	1.4868	166.574	208	1.93468							135.918	173	0.808991
																					144.918	176	1.12717	152.443	190	1.31337							135.934	173	0.809082
																					169.82	232	1.76574	153.41	182	1.43665							135.934	173	0.809318
																					142.049	180	1.03818	161.033	247	1.36877							135.951	173	0.809501
																					143.033	183	0.797014	150.148	197	1.16072							135.951	173	0.809598
																					148.934	180	1.36426	151.361	222	1.21862							135.967	173	0.809631
																					144.131	198	1.35374	148.23	192	1.6061							136	173	0.80998
																					154.148	193	1.44608	149.902	206	1.05986							136.016	173	0.810171
																					138.574	175	1.02625	140.639	178	1.20197							136.016	173	0.810396
																					167.164	219	1.91456	136.656	174	0.69358							136.049	173	0.810633
																					144.328	180	1.20602	132.508	176	0.790893							136.049	173	0.810677
																					154.607	218	1.24792	145.443	190	1.13305							136.049	173	0.810834
																					136.623	179	0.711231	152.803	201	0.903356							136.066	173	0.810869
																					146.672	192	1.4049	164.295	225	1.35822							136.082	173	0.810887
																					166.23	224	1.61195	160.082	212	1.847							136.115	173	0.810942
																					155.721	194	1.09061	152.459	198	1.34049							136.115	173	0.811099
																					158.721	206	1.62885	166.016	222	1.41339							136.115	173	0.811451
																					144.049	171	0.929062	157.295	196	1.38432							136.131	173	0.811723
																					147.574	183	1.21669	163.131	203	1.54869							136.148	173	0.81187
																					145.902	183	0.780483	146.262	179	1.34806							136.148	173	0.812005
																					138.787	187	0.847792	139.18	165	0.970142							136.164	173	0.812038
																					149.016	191	1.20981	150.148	182	1.07183							136.18	173	0.812112
																					148.475	196	0.95596	149.311	183	1.03615							136.18	173	0.812488
																					146.689	183	0.755446	143.295	198	0.793889							136.197	173	0.812538
																					174.623	241	1.60409	134.902	169	0.730575							136.197	173	0.813073
																					147.59	187	1.12377	139.869	179	1.07769							136.213	173	0.813119
																					164.607	214	1.48237	175.738	217	1.8407							136.213	173	0.813275
																					144.213	189	1.17383	139.951	172	0.966619							136.246	173	0.813311
																					145.23	191	0.903664	143.246	197	1.05317							136.246	173	0.813362
																					174.574	231	1.41311	143.164	182	1.06994							136.246	173	0.813639
																					183.41	230	1.5938	157.18	208	1.34456							136.262	173	0.813814
																					160.328	222	1.22669	159.787	204	0.817238							136.262	173	0.813859
																					145.18	176	0.72518	144.377	186	0.679051							136.262	173	0.813888
																					157.672	198	0.99163	148.721	184	1.00453							136.262	173	0.81398
																					147	175	0.878304	154.393	187	1.11255							136.279	173	0.813989
																					123.066	159	1.08565	164.311	192	1.81088							136.279	173	0.814186
																					172.803	219	2.0416	170.41	223	1.45332							136.295	173	0.814274
																					176.639	253	1.52882	151.148	210	0.996015							136.295	173	0.814391
																					169.607	220	1.42567	149.721	198	1.0006							136.295	173	0.814551
																					177.115	233	1.49368	148.918	206	0.681647							136.295	173	0.814583
																					162.869	207	1.25397	154.246	222	0.968464							136.311	173	0.814594
																					155.426	190	1.05466	170.525	230	0.893284							136.328	173	0.815219
																					149.607	188	1.24799	150.918	210	0.950911							136.328	173	0.815366
																					140.984	184	0.773651	177.967	220	1.36679							136.328	173	0.815535
																					161.689	202	0.800363	175.656	225	1.40399							136.361	173	0.815906
																					169.213	226	1.31776	151.754	212	0.642079							136.361	174	0.81591
																					151.049	207	1.00621	146.984	194	1.28587							136.377	174	0.816086
																					152.098	194	1.33484	154.328	193	1.41003							136.377	174	0.816348
																					157.721	192	0.772713	168.82	214	1.58554							136.377	174	0.816902
																					155.639	206	1.2893	165.197	263	1.0858							136.377	174	0.816907
																					145.623	199	0.892392	150.656	201	0.903579							136.41	174	0.816922
																					167.967	221	1.64899	145.525	185	1.60527							136.41	174	0.81693
																					149.377	182	0.773823										136.41	174	0.816991
																					156.721	193	0.645123										136.41	174	0.817161
																					161.574	218	1.47382										136.426	174	0.817174
																					160.607	194	1.32138										136.426	174	0.817177
																					145.295	204	1.13382										136.426	174	0.817238
																					157.787	190	0.81187										136.426	174	0.817252
																					152.557	185	1.29505										136.426	174	0.817307
																					147.344	187	0.602015										136.443	174	0.817357
																					151.213	183	0.755766										136.459	174	0.817485
																					174.689	240	1.64305										136.459	174	0.81769
																					143.525	189	0.967902										136.459	174	0.817998
																					140.279	186	0.878385										136.459	174	0.818601
																					186.016	254	1.66423										136.492	174	0.81897
																					142.066	177	0.839733										136.508	174	0.81905
																					146.082	186	1.12486										136.508	174	0.819245
																					180.607	227	1.74467										136.508	174	0.819351
																					144.279	190	1.27716										136.541	174	0.819866
																					151.475	198	1.77423										136.541	174	0.820303
																					148.164	181	1.25871										136.541	174	0.820364
																					147.475	186	0.98632										136.557	174	0.820405
																					141.131	179	0.952835										136.557	174	0.820495
																					143.689	188	0.924493										136.574	174	0.821009
																					148.295	185	1.2037										136.574	174	0.821059
																					142.344	168	1.15672										136.59	174	0.821326
																					157.131	197	1.81094										136.59	174	0.821334
																					150.131	184	1.24754										136.607	174	0.821447
																					140.279	194	1.20566										136.623	174	0.821808
																					143.426	185	1.04004										136.623	174	0.822103
																					147.689	183	1.15147										136.639	174	0.822146
																					138.623	178	0.768288										136.656	174	0.822638
																					159.574	203	1.64966										136.656	174	0.822802
																					137.82	173	0.920405										136.656	174	0.822918
																					140.721	171	1.11665										136.672	174	0.823101
																					144.984	201	1.183										136.689	174	0.823169
																					137.098	185	0.660061										136.705	174	0.823354
																					150.951	222	0.940381										136.705	174	0.823447
																					143.41	195	0.974181										136.721	174	0.82351
																					189.049	286	1.71103										136.721	174	0.823533
																					134.59	175	0.730025										136.738	174	0.823744
																					147.18	182	0.88464										136.738	174	0.823967
																					161.672	204	1.14517										136.754	174	0.824004
																					151.967	191	1.55907										136.77	174	0.82404
																					147.525	201	0.894192										136.77	174	0.824262
																					145.098	177	1.40522										136.77	174	0.824405
																					152.951	188	1.38315										136.787	174	0.824451
																					139.033	171	0.469971										136.803	174	0.824562
																					161.164	211	1.26518										136.82	174	0.824565
																					171.951	236	1.02165										136.852	174	0.825159
																					147.098	185	0.772778										136.852	174	0.825182
																					151.918	198	0.988884										136.869	174	0.82522
																					156.689	200	1.02561										136.869	174	0.825344
																					155.115	188	1.37973										136.869	174	0.825394
																					151.754	184	0.871076										136.902	174	0.825426
																					166.77	207	1.36874										136.918	174	0.825504
																					152.246	177	1.52841										136.918	174	0.825528
																					164.492	220	1.36421										136.918	174	0.825639
																					161.344	212	1.05494										136.918	174	0.82578
																					144.426	186	0.565965										136.918	174	0.826264
																					176.098	241	1.55386										136.951	174	0.826266
																					147.295	208	0.801943										136.951	174	0.826297
																					152.918	192	0.71899										136.951	174	0.826624
																					179.525	226	1.23895										136.951	174	0.826986
																					161.59	210	1.41466										136.951	174	0.827088
																					152.869	197	0.898693										136.951	174	0.827145
																					154.852	198	1.00713										136.984	174	0.827262
																					158.23	192	1.30113										136.984	174	0.827586
																					156.262	214	1.0614										136.984	174	0.827641
																					143.082	188	0.879229										137	174	0.827868
																					154.016	193	1.12613										137	174	0.827901
																					170.279	216	1.74767										137	174	0.827912
																					155.066	192	1.02009										137	174	0.82797
																					145.607	176	0.696925										137	174	0.828041
																					164.344	211	0.917697										137.016	174	0.828061
																					151.82	191	1.31643										137.016	174	0.828166
																					170.361	211	1.05512										137.033	174	0.828272
																					146.59	196	0.850249										137.033	174	0.828348
																					161.426	202	1.1836										137.033	174	0.828371
																					156.262	210	1.18688										137.049	174	0.828385
																					152.082	195	0.714746										137.066	174	0.828889
																					154.066	185	1.5487										137.066	174	0.829438
																					139.295	173	0.928432										137.066	174	0.829652
																					156.574	205	1.45062										137.082	174	0.829838
																					143.426	180	1.26575										137.082	174	0.830126
																					157.59	220	1.72758										137.082	174	0.830301
																					141.082	182	1.36597										137.098	174	0.830569
																					139.77	163	1.13229										137.115	174	0.830569
																					151.131	179	1.34831										137.115	174	0.831255
																					149.328	195	1.43454										137.131	174	0.83152
																					140.525	188	1.09788										137.131	174	0.831536
																					143.607	186	1.165										137.131	174	0.831641
																					145.426	184	1.12558										137.131	174	0.832309
																					149.984	190	1.03253										137.148	174	0.83243
																					135.852	170	0.793363										137.164	174	0.832698
																					155.18	189	1.62639										137.164	175	0.832712
																					157.705	200	1.54681										137.164	175	0.833789
																					148.148	203	1.16944										137.18	175	0.833915
																					165.951	209	1.18667										137.18	175	0.833925
																					150.049	192	0.998534										137.18	175	0.834032
																					156.984	204	1.12845										137.18	175	0.834043
																					144.934	193	1.28471										137.197	175	0.834245
																					160.934	196	1.48577										137.197	175	0.834284
																					176.328	223	1.81272										137.197	175	0.834587
																					151.934	183	1.15099										137.197	175	0.834655
																					163.59	224	1.17026										137.197	175	0.835008
																					172.098	215	1.37561										137.213	175	0.835139
																					154.623	195	1.16254										137.23	175	0.83533
																					170.672	244	1.14591										137.246	175	0.835521
																					157.082	203	1.31261										137.246	175	0.835534
																					177.689	224	1.60344										137.279	175	0.835959
																					156.016	194	0.779232										137.279	175	0.835966
																					158.689	227	1.1512										137.295	175	0.835996
																					179.656	234	1.56262										137.311	175	0.83608
																					151.754	210	0.879458										137.328	175	0.836117
																					158.885	209	1.26633										137.328	175	0.836183
																					151.639	225	0.651487										137.328	175	0.836202
																					149.213	187	0.76455										137.328	175	0.83623
																					157.328	203	0.784788										137.328	175	0.836547
																					153.426	192	0.658322										137.344	175	0.836713
																					171.23	219	1.92505										137.344	175	0.836726
																					163.098	207	1.29109										137.361	175	0.83685
																					152.721	198	1.01543										137.361	175	0.837017
																					183.525	230	1.83498										137.361	175	0.837066
																					154.443	196	1.11516										137.393	175	0.837467
																					153.361	193	0.905472										137.41	175	0.837479
																					147.066	184	0.585206										137.41	175	0.837509
																					145.426	183	0.662441										137.426	175	0.83757
																					163.787	227	1.30119										137.426	175	0.837789
																					153.492	212	1.20546										137.443	175	0.837892
																					156.721	191	1.22187										137.443	175	0.837906
																					175.148	231	1.41172										137.459	175	0.83805
																					158.508	202	1.41465										137.459	175	0.838057
																					157.115	218	1.46147										137.475	175	0.83806
																					164.016	216	1.28723										137.475	175	0.838168
																					152.18	188	0.885715										137.475	175	0.838451
																					162.918	203	1.30681										137.492	175	0.838795
																					154.115	196	1.21686										137.492	175	0.838948
																					197.098	295	1.63682										137.492	175	0.839186
																					177	228	1.51371										137.508	175	0.839282
																					157.574	189	0.874309										137.525	175	0.839342
																					150.656	204	0.745248										137.541	175	0.839455
																					152.754	189	0.859817										137.557	175	0.839561
																					144.869	180	1.12893										137.557	175	0.839571
																					157.328	195	1.49221										137.557	175	0.839718
																					182.77	252	1.54814										137.557	175	0.839733
																					146.475	177	0.697173										137.557	175	0.839747
																					177.59	250	1.51383										137.557	175	0.840579
																					156.492	217	1.34284										137.574	175	0.841056
																					156.164	204	0.743032										137.574	175	0.841264
																					177.885	250	1.72918										137.574	175	0.841279
																					152.508	200	0.660634										137.607	175	0.841293
																					162.066	212	0.810396										137.623	175	0.841532
																					166.18	210	1.05295										137.623	175	0.841674
																					168.279	210	1.43422										137.623	175	0.841912
																					156.066	191	1.31458										137.656	175	0.842106
																					172.934	214	1.52181										137.656	175	0.842281
																					157.016	191	1.27893										137.656	175	0.842437
																					184.902	226	1.96554										137.672	175	0.842496
																					160.164	194	0.982395										137.689	175	0.842563
																					177.213	227	1.34531										137.689	175	0.842822
																					164.066	217	1.22774										137.689	175	0.842856
																					165.361	214	1.42113										137.689	175	0.842874
																					179.607	232	1.70404										137.705	175	0.843207
																					160.18	202	1.47087										137.705	175	0.84391
																					146.639	187	0.996933										137.705	175	0.843943
																					160.984	201	1.06194										137.721	175	0.844284
																					149.82	190	1.03574										137.721	175	0.844287
																					148.377	178	0.842496										137.721	175	0.844321
																					171.754	226	1.40269										137.738	175	0.844518
																					138.918	185	0.966485										137.738	175	0.845677
																					155.721	200	1.41586										137.738	175	0.846076
																					158.574	225	1.31982										137.754	175	0.846109
																					150.656	196	1.20394										137.77	175	0.846603
																					167.098	218	1.24446										137.77	175	0.846647
																					151.852	207	1.45187										137.77	175	0.846906
																					149.475	186	0.686657										137.787	175	0.846914
																					163.049	209	1.47359										137.787	175	0.846943
																					140.18	176	1.31433										137.803	175	0.846948
																					148.213	189	1.26994										137.803	175	0.84699
																					152.836	194	1.31028										137.803	175	0.847072
																					196.164	253	2.02577										137.82	175	0.847146
																					155.459	197	0.997205										137.82	175	0.847792
																					144.148	179	0.869235										137.82	176	0.848005
																					158.311	195	1.2894										137.836	176	0.848125
																					156.918	207	1.47879										137.885	176	0.848171
																					151.82	203	1.45038										137.885	176	0.848411
																					164.934	217	1.38537										137.902	176	0.848413
																					149.918	186	1.07973										137.902	176	0.848664
																					164.557	228	1.37186										137.934	176	0.849047
																					138.803	179	0.721345										137.934	176	0.849105
																					160.131	212	1.08345										137.951	176	0.849391
																					140.377	189	0.681591										137.951	176	0.849407
																					161.934	222	1.4514										137.951	176	0.849455
																					155.393	182	1.595										137.951	176	0.849913
																					142.033	182	0.723067										137.984	176	0.850034
																					162.148	210	0.938741										137.984	176	0.850125
																					143.262	185	0.657752										137.984	176	0.850249
																					146.984	180	1.14307										137.984	176	0.850294
																					141.967	175	0.896613										137.984	176	0.850317
																					160.098	210	1.6474										138	176	0.850569
																					173.689	239	1.19045										138	176	0.850676
																					159.738	202	1.41159										138	176	0.850815
																					143.213	190	1.17732										138	176	0.850881
																					164.721	200	1.2448										138.016	176	0.85105
																					153.016	204	0.779724										138.033	176	0.851081
																					136.508	183	0.941114										138.033	176	0.851173
																					137.689	174	0.929229										138.033	176	0.85138
																					161.557	223	1.24327										138.033	176	0.851405
																					149.967	200	1.35942										138.033	176	0.851529
																					148.541	199	1.14084										138.033	176	0.851598
																					141.459	193	0.764909										138.049	176	0.851843
																					182.082	241	1.20239										138.049	176	0.85213
																					159.557	210	0.646357										138.049	176	0.852145
																					164.164	223	1.36112										138.066	176	0.852165
																					160.197	209	1.03447										138.066	176	0.852165
																					138.82	189	0.685994										138.066	176	0.852261
																					151.311	196	0.723799										138.066	176	0.852785
																					159.623	208	1.00149										138.082	176	0.853048
																					156.672	203	0.863606										138.082	176	0.853198
																					178.656	230	1.68913										138.082	176	0.85326
																					162.033	206	1.0043										138.098	176	0.853405
																					147.426	197	0.745854										138.115	176	0.853742
																					156.246	214	1.29696										138.115	176	0.853838
																					139.787	178	0.945201										138.131	176	0.854038
																					146.59	184	0.817307										138.131	176	0.85405
																					170.197	216	1.82839										138.131	176	0.854305
																					148.918	199	1.3167										138.131	176	0.854312
																					146.951	182	0.94348										138.131	176	0.854578
																					165.59	208	1.51228										138.131	176	0.855094
																					171.803	215	1.74562										138.148	176	0.855166
																					156.852	198	1.06677										138.148	176	0.855227
																					157.82	208	1.45371										138.148	176	0.855422
																					157.967	236	1.22476										138.164	176	0.855459
																					149.721	198	1.12722										138.197	176	0.855481
																					152.164	192	1.43683										138.197	176	0.855539
																					145.656	179	1.4217										138.213	176	0.855587
																					148.852	184	1.31392										138.213	176	0.856034
																					142.131	186	0.963734										138.213	176	0.856288
																					159.328	193	1.82198										138.23	176	0.856289
																					146.328	195	0.980384										138.262	176	0.856369
																					149.443	184	1.3857										138.279	176	0.856727
																					143.361	183	0.646681										138.295	176	0.856928
																					171.049	242	1.5801										138.311	176	0.856956
																					142.705	166	1.2973										138.311	176	0.85703
																					165.016	216	0.987857										138.328	176	0.857064
																					154.115	199	1.43945										138.328	176	0.857077
																					162.328	230	1.1408										138.344	176	0.857105
																					162.426	202	1.1121										138.361	176	0.857592
																					160.098	194	1.03433										138.361	176	0.857672
																					151.197	207	1.2187										138.377	176	0.858073
																					153.557	185	1.09657										138.377	176	0.858073
																					152.59	185	0.860393										138.426	176	0.858217
																					145.115	181	0.664446										138.426	176	0.858228
																					164.279	212	1.55659										138.426	176	0.858296
																					159.639	196	1.33099										138.426	176	0.858507
																					143.082	192	0.551459										138.443	176	0.858757
																					147.59	184	0.786953										138.459	176	0.858897
																					168.754	226	1.07777										138.459	176	0.858993
																					165.049	211	1.68554										138.475	176	0.859157
																					143.77	187	0.787349										138.475	176	0.859366
																					172.393	238	1.53601										138.492	176	0.859553
																					164.574	217	1.78353										138.492	176	0.859563
																					146.246	181	0.630407										138.492	176	0.85972
																					145.115	196	0.763309										138.508	176	0.859817
																					141.885	180	0.776959										138.525	176	0.859874
																					155.148	205	1.13299										138.525	176	0.859914
																					161.934	196	1.38766										138.541	176	0.860024
																					154.115	187	0.830569										138.541	176	0.860075
																					138.443	182	1.00064										138.557	176	0.860111
																					148.787	184	0.790672										138.557	176	0.86031
																					165.508	201	1.35182										138.557	176	0.860393
																					136.148	178	0.831536										138.557	176	0.860471
																					146.033	193	0.875521										138.574	176	0.860684
																					149.934	190	1.05302										138.574	176	0.860702
																					133.262	162	0.971097										138.59	176	0.860889
																					138.754	192	1.0984										138.59	176	0.861289
																					131.344	167	1.06801										138.59	176	0.861518
																					130.525	163	0.921058										138.59	177	0.861814
																					133.639	177	1.00617										138.607	177	0.861978
																					155.033	197	0.976868										138.607	177	0.862003
																					133.295	160	0.931377										138.607	177	0.862032
																					146.869	203	1.16065										138.607	177	0.862155
																					133.885	178	0.812112										138.607	177	0.86247
																					149.148	192	1.19082										138.623	177	0.862538
																					139.344	178	1.18378										138.623	177	0.862583
																					132.787	172	1.21763										138.639	177	0.863078
																					148.59	184	1.10589										138.656	177	0.863242
																					138.377	170	1.14399										138.656	177	0.86329
																					140.885	173	1.27955										138.656	177	0.86332
																					145.852	180	1.06881										138.672	177	0.863327
																					136.197	171	0.759848										138.705	177	0.863541
																					155.361	229	1.50441										138.705	177	0.863606
																					130.082	174	0.789073										138.721	177	0.863698
																					141.525	179	1.12125										138.721	177	0.863741
																					129.328	161	0.825394										138.738	177	0.863856
																					137.574	202	1.13062										138.738	177	0.864136
																					148.328	206	1.18725										138.754	177	0.864164
																					137.18	182	1.16509										138.754	177	0.864235
																					149.016	198	0.851081										138.77	177	0.864326
																					154.016	194	1.38284										138.77	177	0.864713
																					139.541	199	1.01152										138.787	177	0.865177
																					143.197	181	0.921159										138.787	177	0.865251
																					131.754	167	0.829838										138.787	177	0.865441
																					160.508	199	1.85612										138.803	177	0.865662
																					141.213	173	1.17361										138.803	177	0.865668
																					162.23	217	1.66548										138.803	177	0.865747
																					151.705	214	1.22629										138.803	177	0.865858
																					142.197	178	1.18009										138.803	177	0.866123
																					144.77	185	1.27325										138.82	177	0.866282
																					154.328	220	1.38125										138.82	177	0.866306
																					142.475	177	1.27906										138.82	177	0.866807
																					147.934	195	1.00045										138.836	177	0.866846
																					138.115	179	0.803124										138.852	177	0.866996
																					154.656	197	1.78916										138.852	177	0.867199
																					151.951	204	0.825344										138.852	177	0.867321
																					157.984	203	1.63147										138.869	177	0.86748
																					147.492	203	0.884395										138.869	177	0.868302
																					164.525	212	1.33816										138.885	177	0.868346
																					135.049	176	1.1147										138.885	177	0.868648
																					146.098	184	0.749898										138.902	177	0.868848
																					139.639	176	0.832309										138.902	177	0.868946
																					137.803	172	0.705522										138.918	177	0.869081
																					176.656	222	1.46069										138.918	177	0.869235
																					142.574	180	0.964054										138.951	177	0.869501
																					147.295	190	0.793974										138.951	177	0.869651
																					172.869	238	1.40674										138.951	177	0.870037
																					135.23	164	0.988596										138.951	177	0.870073
																					156.918	199	1.31491										138.967	177	0.870119
																					144.459	173	1.01114										138.984	177	0.870171
																					145.525	183	1.16592										138.984	177	0.870278
																					133.852	165	1.0236										138.984	177	0.870376
																					133.213	170	0.706579										138.984	177	0.870433
																					143.967	188	1.12675										138.984	177	0.870806
																					149.885	210	1.2024										139	177	0.87089
																					153.049	206	1.81871										139.016	177	0.871025
																					137.328	186	0.694998										139.033	177	0.871076
																					140.672	182	0.964216										139.033	177	0.871117
																					152.033	204	1.07086										139.033	177	0.871444
																					154.049	207	1.19732										139.066	177	0.871632
																					129.803	166	0.63266										139.066	177	0.871794
																					166.459	203	1.40576										139.098	177	0.871841
																					166.115	235	1.44728										139.098	177	0.871996
																					140.623	187	0.69947										139.098	177	0.87216
																					146.623	196	1.20459										139.098	177	0.872277
																					146.262	194	1.27606										139.115	177	0.872736
																					136.508	164	0.715626										139.131	177	0.872828
																					144.082	173	1.93258										139.131	177	0.873092
																					139.426	183	1.33482										139.131	177	0.8731
																					150.279	198	0.889414										139.148	177	0.873406
																					154.18	212	1.47326										139.148	177	0.873419
																					126.967	160	0.769458										139.148	177	0.873554
																					168.23	242	1.47872										139.148	177	0.873698
																					137.656	168	0.906697										139.164	177	0.873763
																					186	233	1.79334										139.164	177	0.8738
																					141.541	177	1.02073										139.18	177	0.87386
																					154.459	194	1.45604										139.197	177	0.873983
																					176.049	226	1.6595										139.213	177	0.873996
																					174.984	242	1.635										139.23	177	0.874299
																					154.836	202	1.20125										139.23	177	0.874309
																					131.852	171	0.760199										139.23	177	0.874388
																					134.18	172	0.874838										139.23	177	0.874634
																					160.262	205	0.944554										139.23	177	0.874763
																					136.623	184	0.914621										139.23	177	0.874838
																					152.639	216	1.24013										139.246	177	0.874925
																					146.459	180	1.16829										139.246	177	0.875399
																					140.738	184	0.785729										139.262	177	0.875471
																					160.656	234	1.2626										139.262	177	0.875521
																					151.033	187	1.21496										139.262	177	0.875581
																					160.803	237	1.0713										139.262	177	0.875581
																					160.164	217	1.55112										139.262	177	0.875921
																					167.885	224	1.81376										139.279	177	0.875995
																					138.131	173	0.950775										139.279	177	0.876054
																					166.967	216	1.63628										139.279	177	0.876932
																					164.557	216	1.40051										139.295	177	0.877604
																					134.443	186	0.682588										139.295	177	0.877786
																					156.607	196	1.27934										139.295	177	0.878265
																					145.541	214	1.35698										139.295	177	0.878275
																					151.607	186	1.30822										139.295	177	0.878304
																					146.59	200	0.589818										139.295	177	0.878385
																					148.721	187	1.58351										139.328	177	0.878464
																					145.82	178	1.3304										139.328	177	0.87861
																					165.656	224	1.6181										139.328	177	0.878687
																					155.344	219	1.21601										139.344	177	0.878732
																					158.131	203	1.13627										139.344	177	0.87889
																					149.721	190	0.835996										139.344	177	0.879008
																					170.459	219	1.7699										139.344	177	0.879138
																					165.541	228	1.52493										139.344	177	0.879229
																					150.344	194	1.29601										139.361	177	0.879458
																					131.098	160	0.814594										139.361	177	0.879539
																					146.656	184	0.889451										139.361	177	0.879954
																					155.164	195	1.57252										139.361	177	0.879958
																					161.77	217	1.47475										139.361	177	0.880041
																					193.262	256	2.22327										139.377	177	0.880134
																					154.656	192	0.837906										139.393	177	0.880465
																					160.934	211	1.4757										139.393	177	0.880532
																					131.508	166	0.698461										139.393	177	0.880829
																					162.049	209	1.24549										139.393	177	0.880832
																					162.721	219	0.915521										139.41	177	0.880971
																					159.885	197	1.42968										139.426	177	0.881056
																					141.262	184	1.16746										139.426	177	0.881077
																					133.213	175	0.863856										139.459	177	0.881445
																					157	214	1.16026										139.475	177	0.881514
																					169.311	209	1.15532										139.475	177	0.881858
																					153.098	198	0.735505										139.475	177	0.882375
																					167.967	211	1.57527										139.508	177	0.882434
																					136.672	186	0.889774										139.508	177	0.882819
																					163.115	220	1.53575										139.508	178	0.882994
																					166.934	218	1.12216										139.525	178	0.883108
																					156.705	195	0.990555										139.541	178	0.883118
																					157.508	216	1.21098										139.541	178	0.883268
																					141.852	175	1.23588										139.557	178	0.883819
																					163.541	226	1.46774										139.557	178	0.884071
																					152.607	187	0.648238										139.557	178	0.884088
																					158.869	202	1.04293										139.574	178	0.884395
																					154.016	192	1.21146										139.607	178	0.884452
																					149.115	196	1.56719										139.623	178	0.884623
																					137.787	170	1.11766										139.639	178	0.88464
																					156.049	197	0.915112										139.639	178	0.884655
																					150.984	205	1.36792										139.639	178	0.884676
																					180.508	216	1.41062										139.639	178	0.884743
																					173.311	222	1.2832										139.639	178	0.885433
																					189.918	251	2.24666										139.639	178	0.885715
																					208.787	282	1.69796										139.639	178	0.885725
																					141.246	183	0.675177										139.656	178	0.885742
																					156.344	212	1.29128										139.656	178	0.885744
																					172.754	219	0.984163										139.656	178	0.885811
																					153.951	221	1.44414										139.656	178	0.886013
																					132.639	178	0.55138										139.656	178	0.886264
																					145.393	189	0.690131										139.672	178	0.886289
																					168.836	231	1.30541										139.689	178	0.886567
																					157.23	196	1.3385										139.689	178	0.886716
																					137.016	201	0.547586										139.689	178	0.886868
																					162.984	226	1.75914										139.689	178	0.887007
																					135.377	168	0.863741										139.689	178	0.887296
																					153.18	206	1.19004										139.689	178	0.887397
																					156.475	200	1.25889										139.705	178	0.887437
																					181.475	237	1.84179										139.705	178	0.887464
																					144.131	198	1.31049										139.721	178	0.887502
																					135.361	174	0.749284										139.721	178	0.887574
																					144.689	181	0.887437										139.738	178	0.888098
																					145.148	187	0.826266										139.738	178	0.888236
																					166.492	212	1.55801										139.754	178	0.8883
																					157.541	194	1.35926										139.77	178	0.888418
																					164.311	225	1.38226										139.787	178	0.888424
																					159.082	198	1.60497										139.787	178	0.888536
																					151.574	196	1.1069										139.787	178	0.888671
																					173.738	211	1.40051										139.787	178	0.888825
																					144.295	181	0.613026										139.787	178	0.888866
																					149.787	183	0.981567										139.803	178	0.888995
																					154.689	197	1.20498										139.803	178	0.889414
																					167.148	222	1.52305										139.803	178	0.889451
																					142.492	170	1.39112										139.803	178	0.889774
																					144.689	175	1.11364										139.803	178	0.889983
																					157.672	204	1.34765										139.803	178	0.890123
																					152.984	207	1.11847										139.82	178	0.890539
																					152.852	197	1.44743										139.82	178	0.890633
																					151.393	212	1.22352										139.82	178	0.890638
																					144.951	183	0.718797										139.836	178	0.890809
																					137.574	170	0.732255										139.836	178	0.89085
																					153.23	201	1.05566										139.836	178	0.891031
																					140.049	180	0.970788										139.852	178	0.89111
																					139.164	182	0.565822										139.869	178	0.891346
																					136.328	175	0.817161										139.885	178	0.892065
																					138.787	174	1.01837										139.902	178	0.892315
																					159.23	198	1.31273										139.902	178	0.892392
																					135.639	174	0.823169										139.902	178	0.892692
																					138.787	167	0.887502										139.918	178	0.892874
																					164.541	199	1.26389										139.918	178	0.892913
																					142.607	186	0.664715										139.918	178	0.892914
																					150.311	197	1.16058										139.951	178	0.893044
																					144.295	178	0.866123										139.951	178	0.893219
																					153.738	192	1.25232										139.951	178	0.893284
																					163.279	212	1.32927										139.967	178	0.89336
																					173.82	218	1.58815										139.984	178	0.893488
																					157.18	197	1.2481										139.984	178	0.893669
																					166.639	204	0.922195										139.984	178	0.893767
																					145.459	199	1.04249										139.984	178	0.893865
																					150.213	203	0.676324										140.016	178	0.893926
																					162.525	220	1.22546										140.016	178	0.893938
																					144.279	183	0.955634										140.016	178	0.894038
																					163.885	209	1.08953										140.016	178	0.894192
																					148.77	193	0.785606										140.016	178	0.894212
																					155.148	191	1.0351										140.016	178	0.894284
																					143.262	179	1.1143										140.016	178	0.894367
																					171.459	234	1.29039										140.049	178	0.894479
																					130.984	166	0.52169										140.049	178	0.894564
																					143.311	179	0.96565										140.049	178	0.894564
																					135.574	165	0.580357										140.066	178	0.894735
																					157.361	210	0.760338										140.066	178	0.894925
																					166.59	210	1.71472										140.066	178	0.895224
																					200.344	258	2.22932										140.098	178	0.895303
																					151.918	198	1.22132										140.098	178	0.895726
																					189.918	245	1.82614										140.115	178	0.896108
																					152.131	186	0.87216										140.131	178	0.896368
																					158.344	197	1.08317										140.131	178	0.896393
																					165.721	219	1.32045										140.148	178	0.896613
																					189	232	2.13347										140.148	178	0.896702
																					173.213	228	0.937167										140.164	178	0.896834
																					165.18	213	1.19701										140.164	178	0.896888
																					165.197	219	1.43884										140.164	178	0.897006
																					152.393	205	0.835966										140.164	178	0.897195
																					137.393	189	0.81693										140.164	178	0.89747
																					208.754	277	1.77601										140.164	178	0.898192
																					149.049	188	1.15922										140.164	178	0.898351
																					141.803	179	0.822802										140.18	178	0.898666
																					157.885	205	1.29283										140.18	178	0.898693
																					164.984	222	1.91482										140.18	178	0.898849
																					174.361	222	1.64976										140.197	178	0.899095
																					153.344	210	0.645258										140.197	179	0.899144
																					145.295	181	0.657098										140.213	179	0.899147
																					136.328	177	0.760241										140.23	179	0.899184
																					143.639	177	0.858507										140.246	179	0.899356
																					152.607	187	1.0941										140.246	179	0.899679
																					151.59	200	1.08733										140.262	179	0.899683
																					158.082	209	1.05448										140.262	179	0.899874
																					159.754	221	1.51117										140.262	179	0.900114
																					173.033	216	1.57139										140.279	179	0.900212
																					159.967	205	0.884655										140.279	179	0.900479
																					180	223	1.58964										140.279	179	0.900505
																					159.459	197	1.2052										140.279	179	0.900599
																					157.574	225	1.43475										140.279	179	0.900691
																					139.344	184	0.872828										140.295	179	0.900754
																					182.148	261	1.64457										140.295	179	0.900841
																					131.213	167	0.85703										140.295	179	0.901092
																					152.492	194	0.951436										140.311	179	0.901364
																					144.82	181	0.871632										140.311	179	0.901588
																					150.607	187	1.0034										140.311	179	0.902346
																					158.082	202	1.50434										140.328	179	0.902415
																					169.328	213	1.26033										140.328	179	0.902582
																					149.033	190	1.40381										140.328	179	0.902645
																					163.246	212	1.21042										140.328	179	0.90273
																					168.393	283	1.26452										140.328	179	0.902991
																					144.869	173	1.49814										140.344	179	0.903077
																					167.18	226	0.861289										140.344	179	0.903101
																					155.738	222	0.836117										140.344	179	0.903306
																					146.197	190	0.703507										140.344	179	0.903343
																					141.377	179	0.668309										140.344	179	0.903356
																					167.721	212	1.05862										140.344	179	0.903572
																					235.918	379	1.9088										140.377	179	0.903579
																					143.869	175	1.17125										140.377	179	0.903664
																					158.721	231	0.932335										140.377	179	0.903778
																					212.213	291	1.45169										140.377	179	0.903809
																					163.541	215	1.37055										140.377	179	0.904373
																					161.393	206	1.24898										140.377	179	0.904458
																					158.984	209	1.06191										140.393	179	0.904529
																					161.951	195	1.31917										140.41	179	0.904881
																					162.311	217	1.10278										140.41	179	0.904891
																					165.361	207	0.949767										140.41	179	0.905009
																					140.262	192	1.03672										140.41	179	0.905018
																					184.869	246	1.43124										140.426	179	0.905147
																					139.967	197	0.723298										140.443	179	0.905394
																					149.885	190	0.751828										140.443	179	0.905439
																					146.197	182	1.27643										140.443	179	0.905472
																					153.623	193	1.1359										140.459	179	0.90559
																					164.066	215	0.868946										140.459	179	0.905866
																					156.361	212	1.01733										140.475	179	0.905877
																					149.082	186	0.593488										140.492	179	0.905955
																					154.754	193	0.874634										140.508	179	0.906128
																					173.738	206	1.08632										140.508	179	0.906264
																					145.721	190	0.884088										140.525	179	0.906469
																					173.852	233	1.70128										140.541	179	0.906566
																					161.18	205	1.3933										140.541	179	0.906567
																					172.738	216	1.46063										140.541	179	0.906657
																					181.721	217	1.86114										140.541	179	0.906697
																					143.246	180	0.80767										140.557	179	0.906804
																					158.279	198	1.05739										140.557	179	0.906854
																					183.295	245	1.68446										140.574	179	0.906891
																					153.246	190	1.04099										140.574	179	0.906935
																					134.459	161	0.902582										140.574	179	0.907536
																					146.23	186	0.942473										140.623	179	0.907616
																					154.23	217	0.703923										140.623	179	0.908033
																					173.23	221	1.48928										140.623	179	0.908065
																					153.541	199	1.39708										140.639	179	0.908108
																					145.541	188	0.592534										140.639	179	0.908193
																					171.148	225	1.48067										140.639	179	0.908206
																					152.77	205	0.926703										140.639	179	0.90824
																					147.607	196	1.01703										140.639	179	0.908574
																					156.459	194	1.30005										140.639	179	0.90895
																																	140.639	179	0.908973
																																	140.639	179	0.909655
																																	140.639	179	0.909978
																																	140.639	179	0.910208
																																	140.639	179	0.910334
																																	140.656	179	0.91035
																																	140.656	179	0.910393
																																	140.656	179	0.910519
																																	140.672	179	0.9107
																																	140.672	179	0.911127
																																	140.672	179	0.911174
																																	140.672	179	0.911315
																																	140.689	179	0.911349
																																	140.689	179	0.911452
																																	140.689	179	0.911636
																																	140.689	179	0.911668
																																	140.705	179	0.911769
																																	140.705	179	0.91177
																																	140.705	179	0.911962
																																	140.705	179	0.912277
																																	140.705	179	0.912485
																																	140.705	179	0.912614
																																	140.721	179	0.91271
																																	140.738	179	0.913028
																																	140.754	179	0.913161
																																	140.754	179	0.91318
																																	140.77	179	0.91335
																																	140.77	179	0.913405
																																	140.77	179	0.913405
																																	140.787	179	0.913737
																																	140.803	179	0.914349
																																	140.803	179	0.914387
																																	140.82	179	0.914621
																																	140.82	179	0.914696
																																	140.836	179	0.914913
																																	140.836	179	0.915112
																																	140.852	179	0.915521
																																	140.869	179	0.91556
																																	140.885	179	0.91606
																																	140.885	179	0.916334
																																	140.902	179	0.916493
																																	140.902	179	0.916637
																																	140.902	180	0.916677
																																	140.918	180	0.916746
																																	140.951	180	0.916747
																																	140.951	180	0.916995
																																	140.951	180	0.917057
																																	140.967	180	0.917216
																																	140.967	180	0.917321
																																	140.984	180	0.917525
																																	140.984	180	0.917571
																																	140.984	180	0.917667
																																	140.984	180	0.917697
																																	141	180	0.917873
																																	141	180	0.918049
																																	141	180	0.918254
																																	141.016	180	0.918662
																																	141.016	180	0.919017
																																	141.016	180	0.919277
																																	141.016	180	0.919344
																																	141.016	180	0.919423
																																	141.033	180	0.919831
																																	141.033	180	0.919995
																																	141.033	180	0.920106
																																	141.049	180	0.920405
																																	141.049	180	0.920485
																																	141.066	180	0.920724
																																	141.066	180	0.92086
																																	141.066	180	0.920869
																																	141.066	180	0.921052
																																	141.066	180	0.921058
																																	141.066	180	0.921159
																																	141.082	180	0.921529
																																	141.082	180	0.921533
																																	141.082	180	0.921861
																																	141.098	180	0.92197
																																	141.098	180	0.922195
																																	141.115	180	0.922339
																																	141.115	180	0.922364
																																	141.131	180	0.922399
																																	141.131	180	0.922502
																																	141.131	180	0.922584
																																	141.131	180	0.923142
																																	141.131	180	0.923177
																																	141.131	180	0.923394
																																	141.164	180	0.923461
																																	141.164	180	0.923475
																																	141.164	180	0.923613
																																	141.18	180	0.923622
																																	141.18	180	0.923773
																																	141.197	180	0.923808
																																	141.197	180	0.923895
																																	141.213	180	0.923979
																																	141.213	180	0.924493
																																	141.213	180	0.924579
																																	141.213	180	0.924647
																																	141.23	180	0.924746
																																	141.23	180	0.924828
																																	141.23	180	0.924842
																																	141.246	180	0.925116
																																	141.246	180	0.925172
																																	141.246	180	0.925524
																																	141.262	180	0.925591
																																	141.262	180	0.925597
																																	141.279	180	0.925617
																																	141.279	180	0.925728
																																	141.279	180	0.925822
																																	141.279	180	0.925947
																																	141.295	180	0.92619
																																	141.328	180	0.926347
																																	141.328	180	0.926354
																																	141.344	180	0.926528
																																	141.344	180	0.926651
																																	141.344	180	0.926698
																																	141.377	180	0.926703
																																	141.377	180	0.926717
																																	141.377	180	0.92693
																																	141.377	180	0.926996
																																	141.393	180	0.927001
																																	141.393	180	0.927091
																																	141.393	180	0.927232
																																	141.41	180	0.927253
																																	141.41	180	0.927954
																																	141.426	180	0.928055
																																	141.443	180	0.928077
																																	141.443	180	0.928082
																																	141.459	180	0.928123
																																	141.459	180	0.928204
																																	141.459	180	0.928432
																																	141.459	180	0.928466
																																	141.459	180	0.928582
																																	141.475	180	0.928585
																																	141.475	180	0.928598
																																	141.475	180	0.928608
																																	141.492	180	0.929062
																																	141.508	180	0.929229
																																	141.508	180	0.929424
																																	141.525	180	0.929557
																																	141.525	180	0.929724
																																	141.525	180	0.929865
																																	141.525	180	0.929934
																																	141.541	180	0.929989
																																	141.541	180	0.93003
																																	141.541	180	0.930335
																																	141.557	180	0.930488
																																	141.557	180	0.930493
																																	141.557	180	0.931043
																																	141.557	180	0.931224
																																	141.557	180	0.931293
																																	141.574	180	0.931377
																																	141.574	180	0.931671
																																	141.574	180	0.931731
																																	141.59	180	0.931786
																																	141.59	180	0.931829
																																	141.59	180	0.932112
																																	141.607	180	0.932265
																																	141.607	180	0.932335
																																	141.623	180	0.932618
																																	141.639	180	0.932988
																																	141.656	180	0.933118
																																	141.656	180	0.933397
																																	141.656	180	0.933866
																																	141.656	180	0.933893
																																	141.672	181	0.933925
																																	141.672	181	0.933974
																																	141.672	181	0.934252
																																	141.689	181	0.9343
																																	141.689	181	0.934398
																																	141.705	181	0.934417
																																	141.705	181	0.934652
																																	141.721	181	0.93475
																																	141.754	181	0.934937
																																	141.754	181	0.935112
																																	141.754	181	0.935205
																																	141.77	181	0.935265
																																	141.787	181	0.935731
																																	141.787	181	0.936275
																																	141.787	181	0.93638
																																	141.787	181	0.936483
																																	141.803	181	0.937109
																																	141.803	181	0.937147
																																	141.803	181	0.937167
																																	141.803	181	0.937194
																																	141.82	181	0.937208
																																	141.82	181	0.937273
																																	141.82	181	0.937317
																																	141.836	181	0.937413
																																	141.836	181	0.937553
																																	141.836	181	0.937816
																																	141.852	181	0.937936
																																	141.852	181	0.937939
																																	141.852	181	0.938037
																																	141.852	181	0.938089
																																	141.869	181	0.938529
																																	141.869	181	0.938596
																																	141.869	181	0.938741
																																	141.885	181	0.938812
																																	141.885	181	0.939027
																																	141.885	181	0.93941
																																	141.885	181	0.939493
																																	141.885	181	0.939558
																																	141.885	181	0.940381
																																	141.902	181	0.940398
																																	141.902	181	0.940446
																																	141.902	181	0.940462
																																	141.918	181	0.940552
																																	141.918	181	0.940795
																																	141.918	181	0.940902
																																	141.918	181	0.940938
																																	141.918	181	0.940957
																																	141.934	181	0.940976
																																	141.951	181	0.941114
																																	141.951	181	0.941172
																																	141.951	181	0.941222
																																	141.967	181	0.941461
																																	141.967	181	0.941612
																																	141.984	181	0.941723
																																	141.984	181	0.941782
																																	141.984	181	0.941833
																																	141.984	181	0.94184
																																	142	181	0.941882
																																	142	181	0.941966
																																	142	181	0.942273
																																	142	181	0.942374
																																	142.016	181	0.94243
																																	142.016	181	0.942473
																																	142.033	181	0.942588
																																	142.033	181	0.942728
																																	142.033	181	0.942878
																																	142.033	181	0.94295
																																	142.049	181	0.943033
																																	142.049	181	0.943042
																																	142.049	181	0.943043
																																	142.049	181	0.943059
																																	142.049	181	0.94314
																																	142.066	181	0.94348
																																	142.082	181	0.943489
																																	142.082	181	0.94392
																																	142.082	181	0.943987
																																	142.082	181	0.944016
																																	142.082	181	0.944327
																																	142.098	181	0.944554
																																	142.098	181	0.944669
																																	142.098	181	0.944841
																																	142.098	181	0.945023
																																	142.098	181	0.945124
																																	142.115	181	0.945132
																																	142.115	181	0.945201
																																	142.131	181	0.945221
																																	142.131	181	0.945273
																																	142.131	181	0.945418
																																	142.164	181	0.94604
																																	142.18	181	0.946063
																																	142.18	181	0.9461
																																	142.18	181	0.946313
																																	142.18	181	0.946419
																																	142.197	181	0.946455
																																	142.197	181	0.946466
																																	142.213	181	0.946664
																																	142.213	181	0.9471
																																	142.23	181	0.947215
																																	142.23	181	0.947293
																																	142.23	181	0.947403
																																	142.23	181	0.947585
																																	142.246	181	0.947677
																																	142.246	181	0.947802
																																	142.246	181	0.947863
																																	142.262	181	0.947964
																																	142.262	181	0.9481
																																	142.262	181	0.948111
																																	142.295	181	0.948128
																																	142.295	181	0.948403
																																	142.295	182	0.948864
																																	142.295	182	0.948986
																																	142.295	182	0.94906
																																	142.295	182	0.949074
																																	142.311	182	0.949111
																																	142.311	182	0.949181
																																	142.311	182	0.94946
																																	142.328	182	0.949767
																																	142.328	182	0.950136
																																	142.344	182	0.950292
																																	142.344	182	0.950301
																																	142.344	182	0.95042
																																	142.344	182	0.95043
																																	142.344	182	0.950775
																																	142.344	182	0.950824
																																	142.361	182	0.950911
																																	142.361	182	0.950914
																																	142.361	182	0.950997
																																	142.361	182	0.951165
																																	142.377	182	0.951224
																																	142.393	182	0.951436
																																	142.393	182	0.951454
																																	142.41	182	0.951954
																																	142.426	182	0.952111
																																	142.426	182	0.952137
																																	142.426	182	0.952348
																																	142.426	182	0.952386
																																	142.426	182	0.952399
																																	142.443	182	0.952771
																																	142.443	182	0.952835
																																	142.443	182	0.953008
																																	142.443	182	0.953077
																																	142.459	182	0.953339
																																	142.459	182	0.954102
																																	142.459	182	0.954159
																																	142.475	182	0.954211
																																	142.475	182	0.954215
																																	142.475	182	0.954218
																																	142.475	182	0.954273
																																	142.475	182	0.954327
																																	142.492	182	0.954397
																																	142.492	182	0.954416
																																	142.508	182	0.954438
																																	142.508	182	0.954473
																																	142.525	182	0.95465
																																	142.525	182	0.954842
																																	142.541	182	0.954958
																																	142.541	182	0.955066
																																	142.557	182	0.955105
																																	142.557	182	0.955232
																																	142.574	182	0.955235
																																	142.574	182	0.955634
																																	142.574	182	0.955634
																																	142.59	182	0.955679
																																	142.59	182	0.955803
																																	142.59	182	0.95587
																																	142.59	182	0.95596
																																	142.607	182	0.956277
																																	142.607	182	0.95664
																																	142.607	182	0.956873
																																	142.607	182	0.957191
																																	142.607	182	0.957658
																																	142.607	182	0.957764
																																	142.607	182	0.958127
																																	142.623	182	0.958135
																																	142.623	182	0.958153
																																	142.639	182	0.958182
																																	142.639	182	0.958281
																																	142.639	182	0.95871
[truncated: 4,343 more rows]

## Sheet: Fig 1-supplement 4 6-24xMS2-2
1-1 cell-mean intensity	1-Max intensity	1-SNR	2-1 cell-mean intensity	2-Max intensity	2-SNR	3-2 cells-mean intensity	3-Max intensity	3-SNR	4-2 cells-mean intensity	4-Max intensity	4-SNR	5-3 cells-mean intensity	5-Max intensity	5-SNR	6-2 cells-mean intensity	6-Max intensity	6-SNR	7-1 cell-mean intensity	7-Max intensity	7-SNR	8-1 cells-mean intensity	8-Max intensity	8-SNR	9-2 cells-mean intensity	9-Max intensity	9-SNR	11-3 cells-mean intensity	11-Max intensity	11-SNR		ALL cells	mean intensity	Max intensity	SNR
131.213	171	1.081	143.803	184	1.18001	123	151	0.820452	124.82	159	0.913985	150.77	194	1.06389	121.902	151	0.649669	140.475	190	1.34882	160.41	226	1.83247	136.623	203	0.96274	133.852	191	1.20944			107.836	130	0.202301
124.738	153	0.942996	154.738	219	1.62722	126.098	157	0.77227	122.377	159	0.961446	165.721	228	1.05825	122.426	161	1.15544	145.885	184	1.17447	124.459	149	0.877975	134.016	170	0.876819	130.59	172	1.16767			108.098	133	0.25178
139.049	175	1.39865	174.033	240	1.83638	126.459	157	1.07851	122.967	150	0.807158	202.459	281	1.48683	118.197	142	0.625944	142.902	172	0.906892	166.951	215	1.69493	130.18	186	1.25506	123.508	152	1.01356			110.197	134	0.260961
147.246	182	2.13306	155.295	202	0.832091	126.672	171	0.837113	127.623	163	0.885926	145.738	209	0.730561	130.508	169	0.831252	139.098	167	1.09963	135.967	168	0.925343	150.541	187	1.41567	139.393	197	1.32469			111.672	134	0.27535
131	158	1.28714	189.131	243	1.21421	126.852	166	0.702404	126.639	169	0.678247	152.344	181	1.03257	125.361	162	0.85982	142.787	188	1.14918	153.18	210	1.51738	122.033	148	0.843428	130.377	174	1.06478			111.689	135	0.279971
134.361	169	1.24307	164.951	194	1.2847	126.902	158	0.812727	119.803	143	0.863384	155.639	205	1.06101	127.803	155	0.846981	155.164	198	1.83368	133.836	167	0.915406	141.295	183	1.07034	125.492	158	1.09146			112.131	136	0.280895
146.23	188	1.64211	178.984	240	1.77	126.984	165	0.836113	143.656	202	1.01438	170.23	239	1.2878	126.607	162	0.94663	140.934	174	0.901607	122.377	164	0.607327	136.475	175	1.03246	126.459	162	1.00848			113.541	136	0.315984
140.393	172	1.39021	147.869	199	1.16695	127	154	0.88342	132.77	196	1.01599	144.541	180	0.939089	125.197	165	1.12029	143.738	176	1.08731	138.377	192	1.12631	124.262	155	1.00153	139.967	183	1.40714			113.607	136	0.31961
137.82	179	1.2892	194.918	272	2.02655	127.066	174	1.09572	145.131	186	1.47223	155.115	202	0.965714	120.066	153	0.796626	137.41	169	1.20333	147.115	201	1.5214	147.197	204	1.22806	136.541	181	1.18298			113.885	136	0.323604
136.443	172	1.21282	201.23	281	1.40182	127.131	157	0.908749	143.557	191	1.74322	161.23	262	1.1517	123.934	152	1.06915	142.803	182	1.02596	125.803	167	0.748382	149.508	191	1.44508	133.148	166	1.31617			113.902	137	0.332117
143.459	176	1.1714	150.869	196	1.54678	127.213	165	0.950793	140.672	166	1.31562	151.115	218	0.916878	119.082	147	0.63724	154.787	187	1.02439	174.41	249	1.99886	146.164	190	1.55158	133.246	185	1.34744			113.918	138	0.338663
134.934	160	1.53384	181.246	228	1.39463	127.361	163	1.05832	135.525	184	0.772866	156.098	225	1.48882	123.607	166	0.791605	173.426	220	1.15978	146.967	230	1.46468	128.279	167	1.36642	125.295	163	0.850046			114.066	138	0.339049
144.033	180	1.38081	205.426	277	1.29057	127.475	170	0.840151	124.689	153	0.868431	150.443	206	0.665194	115.639	149	0.61078	135.016	188	0.803354	135.672	177	0.911967	153.41	198	1.34172	128.656	159	1.23437			114.098	138	0.342355
133.967	159	0.845755	186.082	227	1.02758	127.492	173	0.836244	179.492	233	2.00634	153.672	205	1.08931	148.672	195	1.8311	152.164	199	1.31826	127.443	153	1.00861	129.508	170	1.22101	127.803	165	0.99739			114.246	139	0.342891
129.77	164	1.21252	170.836	229	1.61971	127.951	177	0.820055	138.787	190	0.863669	175.279	239	1.28072	121.344	150	0.564093	137.066	172	0.884475	123.098	157	0.938172	145.443	175	1.65437	124.705	156	1.05061			114.279	139	0.343398
137.934	176	1.07257	186.934	229	1.16044	127.984	165	0.95015	150.574	190	1.42151	160.902	230	0.873955	123.213	157	0.571708	144.672	181	1.31326	135.131	178	1.24268	134.869	179	1.33818	132.246	168	1.37134			114.525	139	0.34857
140.803	179	1.59894	173.787	218	1.2839	128.082	163	0.693543	142.623	183	0.977973	139.59	179	1.00797	125.311	150	1.02894	186.459	240	0.734441	137.049	188	0.890418	154.377	201	1.87044	120.82	157	0.805674			114.639	139	0.350232
125.77	164	0.82362	170.82	206	0.763103	128.18	160	1.04958	133.77	172	0.9865	166.328	220	0.663213	121.016	154	0.915995	183.951	229	1.09267	121.41	155	0.639607	128	175	1.07669	128.016	169	0.841229			114.656	140	0.350867
139	179	1.61326	178.066	214	0.925522	128.279	170	0.856353	130.426	170	0.727919	173.803	248	1.18661	138.426	171	1.50463	167.033	209	1.51107	126.328	156	0.905149	141	207	1.48571	123.295	157	1.11425			114.721	140	0.359669
131.426	184	0.838564	144.443	188	1.57778	128.361	176	0.797925	134.787	169	1.44277	144.164	192	0.872835	114.639	148	0.478845	182.311	237	2.02303	132.148	172	0.891519	141.098	185	1.05392	120.82	146	0.639676			114.738	140	0.360965
165.246	206	1.78054	192.574	235	1.226	128.656	166	1.06505	145.623	181	1.42791	204.492	271	1.44264	118.213	151	0.862029	158.066	234	1.18444	129.934	165	1.16353	166.492	222	2.23589	124.098	161	1.0763			114.787	140	0.361292
135.82	175	1.52556	168.59	255	1.21226	128.705	166	0.998659	157.951	220	1.80169	160.77	217	1.20747	119.557	156	0.693529	181.934	234	1.5829	120.82	150	0.578929	124.672	161	1.0772	130.672	172	1.38413			115.033	140	0.361479
153.197	203	1.37556	186.705	235	0.92852	128.82	162	1.11528	155.492	213	1.84372	154.426	185	0.936266	118.033	154	0.483551	180.59	244	1.03906	122.41	155	0.888972	127.131	164	0.629182	126.492	160	1.05091			115.082	140	0.369026
162.984	214	1.72734	179.213	211	1.17876	128.902	166	1.18131	122.902	152	1.01067	153.918	211	0.71944	121.721	154	0.7567	164.344	205	1.19833	135.377	174	1.19005	134.951	193	1.15646	159.279	224	1.78109			115.18	141	0.372771
138.656	184	1.34471	211.41	255	1.99078	129.016	169	0.862975	131.541	167	1.04161	164.459	219	1.27607	119.426	153	0.451091	163.77	192	1.03999	126.328	161	0.799726	132.885	168	1.36388	133.295	170	1.48599			115.246	141	0.378817
132.164	168	0.907798	180.475	235	1.13135	129.246	163	1.6742	153.377	204	1.75875	162.41	239	0.650987	133.361	175	1.4481	168.902	209	0.876095	126.918	170	0.879542	123.918	158	1.04503	129.049	179	1.00212			115.41	141	0.384948
133.574	169	0.97953	138	169	0.95558	129.262	168	0.831212	129.344	162	0.951262	165.197	218	1.13507	122.443	148	1.05104	168.607	221	1.49537	124.148	165	0.857732	156.23	226	1.5763	148.951	210	1.61955			115.426	141	0.386164
137.574	175	1.29303	193.689	277	1.55057	129.361	170	0.839587	134.754	171	0.85611	160.148	210	0.937956	125.951	161	0.568989	167.836	224	0.761143	135.279	181	0.860905	139.574	186	1.57162	128.689	166	1.07381			115.459	141	0.39021
137.607	177	0.984712	172.262	222	1.06684	129.492	172	0.705555	148.967	201	1.90134	149.836	182	1.09479	124.689	157	0.855975	179.213	221	1.03091	162.754	207	2.03134	144.918	196	1.37741	127.852	161	1.20137			115.459	141	0.391779
142.836	180	1.35942	196.295	243	1.52141	129.623	164	0.819082	150.443	212	1.81582	148.115	202	0.775586	121.18	155	0.785819	184.115	242	1.17917	119.328	169	0.66395	141.131	195	1.51127	128.672	185	1.02257			115.492	142	0.393793
135.164	168	1.10657	175.82	232	1.37339	129.656	182	0.71836	133.721	183	0.937063	154.328	221	0.894226	129.443	169	1.06825	165.426	204	1.08918	123.262	164	0.51335	146.951	203	1.46757	127.951	159	1.15486			115.492	142	0.393917
158.754	215	1.55466	204.459	279	1.7916	129.82	165	1.1659	123.377	164	0.718934	158.885	194	1.23573	132.033	171	1.15669	175.377	229	0.966638	130.18	161	0.954206	124.443	160	0.959516	119.574	144	0.690934			115.639	142	0.398604
148.148	190	1.51013	142.23	183	1.49272	129.934	177	0.882111	145.443	190	1.48626	166	222	1.20151	127.213	165	0.990924	171.246	230	0.643236	139.738	189	1.21553	147.279	223	1.39042	125.475	162	0.954477			115.754	142	0.404038
132.23	164	0.90996	188.738	243	1.63536	130.148	163	0.993249	125.656	158	0.748232	176.836	265	1.19244	130.164	168	2.62535	175.689	231	0.661363	135.59	176	1.18202	134.016	168	1.06108	130.279	167	1.26035			115.787	142	0.409558
144.23	182	1.17658	184.705	231	1.07067	130.197	158	0.710137	136.607	202	1.22539	167.18	209	1.32294	145.639	198	1.55116	171.705	209	1.3077	129.721	158	1.10621	123.016	144	0.774453	128.836	161	1.39195			115.82	142	0.409997
127.754	157	0.746762	138.426	169	0.851982	130.197	180	0.756204	144.59	179	1.74322	172.459	231	1.15644	119.967	165	0.555265	162.164	206	0.614528	132.869	176	0.753918	134.475	162	1.16088	136.279	180	1.42347			115.836	142	0.410008
137.311	176	0.634197	208.541	295	1.55363	130.213	163	0.815048	120.18	159	0.868514	157.033	217	1.06414	127.328	166	1.23784	174.475	219	0.525612	122.77	147	0.780049	134.246	169	0.940548	141.656	203	1.39131			116.115	142	0.412025
133.393	170	0.750361	199.115	277	1.51156	130.328	172	0.932669	126.705	163	0.880938	145.508	198	1.11063	115.033	145	0.710603	185.951	277	0.828216	123.951	158	0.580962	147.246	194	1.10985	137.541	200	1.0574			116.213	142	0.417327
126.951	159	0.833616	199.525	283	1.37744	130.344	172	0.777487	119.279	148	0.687917	163.23	211	1.40075	125.77	151	0.8157	184.508	223	0.816906	132.213	181	1.28246	146.262	186	1.14558	132.721	167	0.95688			116.246	142	0.418374
138.984	180	1.36121	169.902	226	1.45768	130.41	173	0.993228	129.607	173	1.42422	163.59	216	0.971674	118.754	157	0.569758	177.869	220	0.887287	132.41	166	1.17604	147.508	202	1.07083	136.705	173	0.976026			116.262	143	0.421777
135.426	173	1.44487	140.115	181	1.00709	130.426	171	1.0784	122.672	166	0.642305	158.918	240	1.15612	119.361	148	0.940286	187.59	249	0.927147	132.836	183	0.842741	147.525	203	1.17205	137.656	172	1.45862			116.344	143	0.423076
141.049	185	1.23745	206.066	310	1.30001	130.541	168	0.855022	136.197	172	1.14333	155.098	192	0.685687	118.443	150	0.64419	185.492	221	0.739911	138.443	165	1.03162	140.689	168	1.6832	156.426	217	1.59547			116.41	143	0.42327
141.902	173	0.634742	184.836	239	1.62947	130.787	179	0.662005	121.738	164	0.935609	188.295	246	1.70628	117.377	140	0.498433	165.459	213	1.52719	134.672	184	1.05214	130.23	180	0.933842	126.689	154	0.729403			116.426	143	0.427076
146.902	188	1.33741	171.361	255	1.71424	130.82	164	1.24936	140.344	182	1.15732	165.197	234	1.26916	132.049	174	1.3962	154.459	189	1.45754	130.246	159	1.23384	133.016	179	1.30369	146.41	193	1.42761			116.492	143	0.432618
130.541	171	0.818809	168.623	204	0.822909	130.836	165	1.28426	132.393	164	0.912132	171.902	233	1.16862	128.426	161	0.851619	164.639	205	0.643841	143.721	187	1.54306	134.721	170	1.27896	127.557	160	0.726942			116.541	143	0.436407
151.967	196	1.75519	169.115	215	1.15033	130.869	189	1.08587	137.803	174	1.09238	179.066	245	1.21721	131.689	176	1.28156	177.066	236	1.01986	125.984	174	0.700026	122.639	153	0.722329	151.967	199	1.47007			116.656	143	0.438526
139.049	185	1.03153	182.754	238	0.939179	130.934	167	0.971484	128.689	165	1.09504	168.492	237	0.937913	120.738	152	0.674456	131.311	166	0.891527	128.803	165	1.03052	141.033	174	1.75997	162.098	225	1.42947			116.672	143	0.438708
140.525	177	1.07049	159.131	199	1.63221	130.951	167	1.06386	142.82	181	1.02723	171.852	220	1.05992	115.082	144	0.594062	133.721	168	0.876184	123.836	153	0.992459	131.295	161	1.192	124.607	155	0.854777			116.689	144	0.439933
141.459	169	0.965023	191.918	232	1.4576	130.984	194	1.09412	145.902	209	1.0336	158.902	212	1.98818	127.82	161	0.945771	131.557	160	1.69106	123.082	161	0.886968	142.279	185	1.31807	137.787	179	1.26422			116.738	144	0.443196
142.344	186	0.511817	157.475	233	1.84731	131.115	175	1.42411	136.672	177	1.22621	181.557	234	1.05142	127.82	151	1.08287	124.934	150	1.02102	133.672	162	1.4038	130.492	163	0.897525	133.164	172	1.10452			116.82	144	0.445321
153.082	198	0.617489	168.492	205	0.958091	131.197	173	0.625376	127.852	155	0.772257	139.885	177	0.966053	127.311	152	0.831579	136.197	167	1.56543	122.525	172	0.81065	122.689	151	0.910007	165.115	224	1.85813			116.902	144	0.445925
148.885	196	1.57229	139.23	183	0.981818	131.262	164	1.1265	147.525	194	1.51157	170.41	228	1.34213	127.492	152	1.23486	129.639	156	0.92469	124.18	161	0.862873	166.033	223	2.13496	132.033	169	1.25194			116.951	144	0.451091
127.459	153	0.904989	153.361	209	0.731806	131.262	166	1.06098	146.705	192	1.6148	170.426	212	1.27863	127.262	173	0.533141	131.918	166	0.996462	127.967	148	1.30629	126.393	163	1.08472	134	193	1.10479			117.033	144	0.452632
142.016	184	1.13005	139.607	175	1.19882	131.361	169	0.900073	123.951	179	0.744312	146.426	182	0.81962	123.852	156	0.995098	142.852	192	1.79836	124	170	0.872108	152.41	215	1.64689	129.082	162	0.946328			117.033	144	0.453453
154.393	186	0.605825	170.443	231	0.787905	131.426	161	1.21874	146.246	197	1.19952	158.82	190	1.48933	133.508	184	1.49503	133.623	162	1.5192	133.098	180	1.09481	125.902	154	1.22719	149.656	192	1.83205			117.049	144	0.453677
142.541	175	0.782373	140.984	179	1.79465	131.475	168	1.06612	140.639	188	1.37294	153.541	208	0.633021	136.541	175	1.07172	177.197	258	1.80784	124.525	175	0.811096	156.23	214	1.59935	141.77	181	1.4957			117.082	144	0.454828
139.344	168	1.14173	180.77	234	1.05855	131.492	165	1.09549	164.475	234	1.74435	164.082	228	1.17561	113.902	144	0.342891	134.902	171	0.946731	131.656	164	0.961442	118.852	141	0.654235	136.885	174	1.24507			117.164	144	0.454981
167.344	211	1.27709	178.377	216	0.993863	131.852	165	1.24327	132.344	168	0.950947	146.902	191	2.03928	116.902	142	0.622164	141.623	188	0.879356	143.934	182	1.53976	132.705	170	1.29356	141.066	177	1.57865			117.18	144	0.455301
132.672	164	0.653724	166.426	221	0.760714	131.934	177	1.04771	149.492	199	0.972915	206.148	300	1.75337	120.803	151	0.771727	170.951	208	1.46162	120.574	157	0.763597	130.721	171	1.14229	132.59	170	1.19594			117.197	144	0.45571
141.213	176	1.59685	137.639	166	1.25639	132.049	164	1.20328	130.131	163	0.842671	165.852	217	0.777196	124.689	171	0.917318	161.82	198	1.8238	126.213	161	0.778654	125.18	163	0.793265	129.066	183	0.922207			117.23	144	0.457132
134.967	178	0.791803	217.033	307	1.53257	132.098	171	1.0457	178.262	226	1.7169	163.377	212	0.775909	116.41	148	0.679956	143.115	179	1.14198	127.869	162	0.686176	132.738	159	1.277	131.361	160	0.949199			117.328	145	0.45887
170.246	225	1.71177	136.082	173	1.3862	132.098	160	0.987059	144.311	195	1.44173	151.082	197	1.35028	121.328	148	0.706031	162.656	216	1.839	131.885	159	0.975173	143.803	184	1.52021	131.721	182	0.922354			117.328	145	0.459792
140.672	182	1.54094	168.525	217	0.902427	132.115	170	1.18667	140.361	184	0.685529	145.787	195	0.7045	122.148	146	0.713386	157.475	203	1.57038	125.82	170	1.05016	129.344	157	0.927579	127.836	164	0.784574			117.344	145	0.46774
149.672	176	1.19363	176.902	215	1.17547	132.197	179	1.18871	143.787	181	1.0536	163.459	195	1.15554	118.328	163	0.665416	166.443	227	1.57215	124.082	150	0.993863	140.623	184	0.984475	125.18	150	0.781775			117.344	145	0.472775
139.607	174	1.25929	164.77	209	1.91533	132.246	166	1.23071	130.705	162	0.895331	158.066	201	1.0635	120.754	153	0.720236	155.328	192	1.49299	134.918	180	0.757542	156.852	199	1.66453	124.574	173	0.859264			117.377	145	0.473774
140.098	181	1.00235	144.574	192	1.38983	132.295	172	0.931555	130.475	164	1.10509	158.672	211	1.08825	138.295	186	1.42318	164.475	212	1.9394	124.197	154	0.846322	141.836	183	1.3927	128.508	157	1.04835			117.426	145	0.476051
141.016	176	0.870411	179.393	239	0.930785	132.328	175	1.08743	129.049	162	0.974227	161.721	213	1.07006	119.049	156	0.628581	134.77	177	0.813815	121.803	163	0.751706	127.115	148	1.00346	148.279	200	1.52812			117.426	145	0.477962
142.672	166	0.857639	170.295	214	0.840573	132.328	168	0.980621	144.689	179	1.43597	152.525	190	1.23018	121.164	151	1.03148	139.623	183	0.719509	139.541	193	1.31602	129.311	173	1.00118	122.984	156	0.863111			117.508	145	0.478411
148.23	196	1.47459	139.328	178	0.894804	132.377	159	0.931865	135.721	173	1.06396	165.672	226	0.778651	116.492	140	0.726973	139.525	179	0.733517	142.934	202	1.19268	121.426	157	0.975151	133.475	176	1.16601			117.525	145	0.478845
123.033	151	0.913002	176.77	215	1.40038	132.41	176	0.859339	131.885	175	0.986677	159.098	200	1.70927	118.377	151	0.730542	140.279	180	0.849675	149.443	204	1.50522	132.541	175	1.12243	150.77	199	1.71168			117.557	145	0.481003
137.492	166	1.07829	138.82	170	1.30361	132.443	185	0.717515	139.459	183	1.20003	178.918	258	1.30825	162.787	230	1.88854	139.393	168	0.947781	145.443	186	1.33809	142.262	185	1.5688	132.098	177	1.09808			117.574	145	0.481283
126.902	166	0.737878	181.197	223	1.77527	132.689	163	0.897594	145.656	203	1.17867	186.852	233	1.32145	143.049	187	1.58185	150.262	177	0.999701	121.426	162	0.750379	128.459	166	1.19687	136	174	1.30751			117.607	145	0.483263
160.934	194	1.77894	137.066	174	0.945011	132.82	173	1.17382	128.852	159	0.674243	167.951	236	1.36788	128.295	155	1.35239	143.492	183	1.07731	158.262	209	1.90222	143.607	183	1.81963	142.59	205	1.18163			117.656	145	0.483551
131.443	160	0.839175	163.934	206	0.958263	132.852	167	1.2567	124.098	155	0.967438	157.115	241	0.953868	121.066	170	0.762086	143.148	177	1.1382	138.525	190	1.16017	127.557	163	0.977575	126.508	157	0.872213			117.689	145	0.486073
153.328	220	1.44731	194.459	248	1.62831	132.902	180	0.903472	164.82	217	1.68173	160.148	198	0.938793	132.557	163	1.46211	135.754	171	0.700533	134.311	174	0.854329	133.902	175	1.16327	131.311	169	1.0092			117.705	145	0.486529
139.098	174	1.09893	202.852	278	1.64597	133.066	184	0.729728	142.557	181	1.21373	164.951	224	1.07246	116.656	153	0.598386	158.836	215	1.34956	136.197	196	0.943231	146.262	189	1.61879	122.885	165	0.903333			117.721	145	0.489607
162.41	213	1.97479	130.639	169	1.25206	133.393	159	0.83791	154.984	224	1.79185	180.262	228	1.7386	128.607	151	1.4469	148.41	196	1.29587	129.213	159	1.19344	138.131	169	1.39277	131.148	181	1.02417			117.77	145	0.491426
140.689	173	0.941467	159.131	209	1.63726	133.41	177	1.10075	140.049	194	1.17227	143.836	183	0.855429	153.066	195	1.73116	148.607	194	1.10711	127	157	0.977489	135.311	172	1.32058	122.508	158	0.946477			117.852	145	0.49163
136.18	173	0.530615	133.738	180	1.00228	133.475	173	0.949833	141.623	187	1.44183	158.885	216	1.1026	118.738	154	1.95826	150.344	199	1.13236	125.475	154	0.979185	132.639	175	1.08482	125.459	161	1.09256			117.869	146	0.49191
143.557	185	0.630041	138.131	190	1.23429	133.607	171	0.728223	124.59	153	0.670465	165.738	218	1.30958	130.131	161	1.17797	161.213	208	1.44931	121.279	167	0.884903	167.213	228	1.81595	116.82	147	0.887411			117.902	146	0.493909
135.393	170	1.01037	140.59	183	1.48539	133.77	164	1.2582	127.82	159	0.681462	158.869	205	0.922633	117.23	154	0.676504	159.213	205	1.43952	137.803	187	1.43894	130.902	174	1.19528	131.098	183	1.04864			117.918	146	0.494829
183.836	264	1.59306	144.984	177	1.49821	133.803	157	1.18512	139.18	183	0.99462	186.475	253	1.16034	129.197	182	1.01247	149	191	0.86446	130.689	175	0.77685	134.787	165	1.12529	131.902	167	1.27891			118	146	0.495174
149.377	195	0.872517	130.049	172	0.898543	133.885	170	1.46955	154.492	199	1.94292	160.803	213	0.852489	132.295	176	1.56332	141.902	190	0.849956	135.705	181	1.71926	146	179	1.64454	125.475	161	0.908334			118.033	146	0.496113
161.721	206	1.73888	127.607	173	0.824656	134.033	164	1.06021	156.557	188	1.83228	168.115	226	1.07147	128.393	158	1.62288	156.902	212	1.36086	133.672	181	0.858855	137.082	169	1.53698	123.131	156	1.10331			118.098	146	0.49807
157.541	196	0.544184	148.016	193	1.11562	134.098	183	1.0955	143.689	176	1.32039	161.738	221	1.0984	126.705	162	0.955497	164.426	219	1.50429	137.902	183	1.08753	131.295	167	1.03102	120.574	156	0.999017			118.098	146	0.498433
151.049	206	0.712991	140.459	176	1.69506	134.131	169	1.1209	131.23	155	1.11058	170.852	226	1.3242	119.426	178	0.589354	159.131	208	1.49525	149.803	183	1.58279	134.115	174	1.31577	115.246	147	0.702943			118.148	146	0.498756
132.049	197	0.839294	159.377	207	1.52593	134.148	172	0.741247	126.164	156	0.726833	173.705	227	1.09726	115.459	151	0.548604	144.016	182	1.05456	132.426	159	0.789172	140.262	171	1.47468	121.836	146	1.13739			118.18	146	0.501139
155.82	202	0.841483	136.098	184	1.31932	134.148	165	1.10968	135.098	159	1.36328	160.951	222	1.26298	131.951	156	1.63282	159.197	210	1.28488	130.623	177	0.838971	147.033	198	1.42408	132.262	160	1.32854			118.197	146	0.502584
143.885	192	0.933493	142.131	196	1.31004	134.164	176	0.982389	126.885	164	0.719394	154.18	203	0.777325	124.361	172	0.923939	163.213	208	1.9032	139.967	169	1.21541	135.902	178	1.34601	135.77	168	1.54416			118.213	146	0.502951
143.934	177	0.799892	147.852	187	1.73291	134.213	162	1.14475	133.607	171	1.15603	154.066	200	1.33683	121.738	159	0.968462	161.459	191	1.46077	125.41	163	0.648233	131.131	178	0.895717	123.656	147	1.08787			118.295	146	0.503599
130.574	177	1.05657	132.164	172	1.12619	134.23	182	0.85626	121.721	151	0.651375	156.033	200	1.00414	121.984	149	0.684439	149.656	195	1.23785	151.852	189	1.84873	150.148	222	1.33841	138.82	183	1.42729			118.328	146	0.505528
149.525	190	0.994919	135.77	187	1.2997	134.328	175	1.03182	126.361	171	0.728177	155.803	200	0.943013	134.672	193	1.17468	140.115	174	0.678443	122.066	160	0.63041	132.754	171	1.19255	136.41	170	1.34381			118.361	146	0.50716
176.885	220	0.779965	159.213	227	1.84407	134.459	179	0.919694	140.967	169	0.899137	153.885	197	0.749487	115.492	139	0.527092	160.885	200	0.889492	130.951	170	0.865335	122.721	155	0.758407	135.41	179	1.63542			118.377	146	0.508146
164.23	197	1.05681	166.869	211	2.12447	134.607	176	1.11544	137.443	180	1.22342	168.279	223	0.689334	123.885	162	0.724786	168.754	209	1.81884	133.574	168	1.33163	135.295	176	1.06783	135.377	197	1.3286			118.41	146	0.508744
152.492	188	0.688037	144.738	205	1.63285	134.656	171	1.04753	143.525	183	1.34503	153.23	217	0.758415	127.607	163	0.979466	164.016	210	1.26423	130.705	169	1.01979	132.852	184	0.696926	123.738	153	1.05562			118.426	146	0.509513
173.066	222	0.883117	135.82	175	1.09573	134.836	172	1.42881	132.508	168	1.25926	153.951	214	1.07019	120.016	155	0.712508	162.328	215	1.27909	138.262	170	1.24356	161.623	208	1.79945	131.525	191	1.28435			118.443	146	0.511669
150.59	186	0.503599	151.951	194	1.73884	135.066	184	1.079	137.541	170	1.14095	147.377	184	0.904558	130.41	167	1.09574	157.525	195	0.736561	132.213	156	1.07558	136.689	184	1.27952	130.656	168	1.22391			118.475	147	0.511817
175.328	229	0.970565	129.787	162	1.09312	135.164	178	1.22548	151.033	195	1.82032	174.197	218	1.3913	132.016	187	1.12871	152.836	194	1.36622	124.607	157	0.545831	126.656	159	0.760507	125.836	165	1.1652			118.492	147	0.512889
161.23	227	1.83468	133.59	164	1.3632	135.197	174	0.859284	126.869	152	0.882257	164.18	245	1.14188	132.967	179	1.63389	150.295	192	1.65931	128.443	171	0.642652	138.049	176	1.0741	126.672	152	1.09907			118.541	147	0.51335
169.426	199	0.747783	137.689	180	1.28165	135.213	176	1.10995	152.656	195	1.81637	162.049	196	0.899416	125.295	156	1.01023	134.131	167	1.00809	144.23	188	1.57896	157.902	198	1.80132	131.443	193	1.06354			118.541	147	0.51448
157.82	196	0.615003	143.82	197	1.3346	135.23	176	1.00972	129.197	169	0.756083	144.148	183	1.0586	122.393	156	1.06159	134.262	175	0.851013	133.705	171	0.998293	129.426	171	1.00279	136.754	173	1.66756			118.557	147	0.516089
154.033	191	1.38196	149.754	190	1.28664	135.295	176	1.46931	139.869	187	1.30202	157.049	201	1.12364	161.689	216	1.96905	136.852	164	1.13483	145.098	197	1.41699	143.246	190	1.30762	135.77	176	1.15438			118.557	147	0.516135
132.885	226	0.728278	159.23	208	1.49713	135.328	163	1.29588	125.852	157	1.17196	147.541	211	0.719979	123.311	157	0.605506	136.279	168	0.928497	146.852	191	1.20893	130.689	167	0.918872	138.557	164	1.90198			118.623	147	0.516647
158.213	225	0.850161	150.803	196	1.5307	135.361	178	0.778049	145.639	173	1.90534	147.115	183	1.33416	120.59	164	1.08123	132.148	169	1.02377	139.066	188	1.02097	124.361	146	1.10771	148.836	181	1.40389			118.738	147	0.516916
151.049	193	0.835406	137.885	171	1.03594	135.41	174	1.01283	131.607	182	0.877025	137.672	172	1.2935	121.279	152	0.867616	128.361	160	0.809147	149.328	193	1.41227	128.18	158	0.963925	139.344	189	1.37083			118.738	147	0.518576
170.508	217	0.529459	146.213	191	1.50612	135.459	175	1.1536	136.426	171	1.3029	160.689	208	0.812345	126.836	161	1.19061	144.492	189	1.00871	149.197	190	1.71047	132.082	169	1.30036	148.836	181	1.40389			118.738	147	0.51872
171.393	221	0.942214	131.508	164	1.17099	135.475	165	1.32403	130.18	159	1.26726	159.311	224	1.09021	135.344	173	1.39111	175.262	230	1.96494	124.984	157	0.646155	164.328	209	1.89193	132.984	173	1.42081			118.754	147	0.519313
183.295	236	1.15149	188.639	248	1.59599	135.492	169	1.3561	124.541	159	0.786073	156.475	239	1.18866	131.967	160	1.23216	167.23	253	1.82507	121.869	161	0.706916	140.492	184	1.58881	138.148	177	1.41238			118.77	147	0.519524
194.541	285	2.45597	137.754	168	1.23228	135.557	202	1.12127	137.934	189	1.33449	147.148	188	1.13795	128.902	180	1.10053	146.131	184	2.20162	137.672	182	1.38263	137.77	173	1.04876	132.098	169	0.985052			118.836	147	0.519632
192.721	241	1.01342	167.918	236	1.43911	135.557	168	1.20104	124.475	154	0.795946	163.328	214	1.25627	119.393	148	0.875674	139.869	172	0.923491	141.656	175	1.37477	155.574	218	1.79605	136.59	180	1.56224			118.852	147	0.520219
165.525	211	0.971827	179.361	228	1.56179	135.639	182	0.6568	136.443	171	0.705292	161.148	229	1.31544	114.721	147	0.516089	144.574	195	0.973932	149.18	207	1.56218	139.213	180	1.37359	144.885	184	0.950024			118.852	147	0.521344
132.066	191	0.80419	161.852	199	1.38484	135.656	170	1.16526	130.311	169	0.667608	182.197	263	1.02231	133.59	175	1.46879	141.131	182	0.764143	142.623	187	1.54446	135.885	188	0.930674	137.639	179	1.32173			118.885	147	0.521561
144.246	175	1.27784	169.721	219	1.26504	135.656	182	0.968808	135.852	181	1.27922	154.77	194	0.848228	114.787	152	0.681937	162.164	209	1.59739	123.639	179	0.747361	124.967	159	0.985627	139.869	192	1.14691			118.934	147	0.521629
168.23	231	0.880601	151.869	192	1.708	135.738	181	0.908067	125.885	169	0.908596	164.656	212	1.10651	142.672	187	1.42064	159.934	188	1.67322	127.967	178	0.938859	122.098	155	0.788091	146.836	202	1.57012			118.967	147	0.522209
207.459	289	1.53298	156.377	201	1.57525	135.803	193	1.13889	139.869	171	1.33368	175.426	240	1.18806	124.574	147	1.06977	172.164	231	1.79122	150.344	197	1.22712	132.59	182	0.986163	137.361	171	1.57628			118.984	147	0.52282
173.59	209	1.23081	144.787	194	1.88363	135.885	178	1.0814	122.361	151	0.661329	149.344	189	1.00718	133.82	175	1.44192	150.066	191	1.3479	128.525	171	0.602397	134.311	168	1.30675	151.213	207	1.61336			119	147	0.523837
174.361	212	1.12905	136.82	181	1.28137	135.918	211	0.717488	117.721	136	0.702886	165.508	239	1.11104	131.246	163	1.10707	140.623	181	1.02123	130.852	172	0.805059	126.607	169	0.860866	123.426	154	0.795231			119	147	0.524747
218.41	286	1.81447	150.082	184	1.34015	135.951	169	1.02825	121.098	149	0.889438	155.311	228	0.900268	122.459	156	0.51448	133.443	175	0.599065	126.787	157	1.1379	136.18	178	1.3514	143.295	187	1.45911			119.033	147	0.525612
184.18	252	1.75557	154.705	215	1.03861	136.131	170	0.91528	126.213	152	1.14795	159.23	216	0.991629	134.262	175	1.23904	152.311	203	1.36792	134.738	174	1.01452	131.443	160	1.19498	143.574	173	1.93455			119.049	147	0.525675
167.361	214	1.23337	141.115	192	1.44376	136.197	175	1.02237	127.377	171	1.05957	181.623	238	1.51327	119.033	180	0.42327	136.377	173	1.0941	122.279	155	0.660161	144.82	192	1.4393	134.82	162	1.07246			119.049	148	0.527043
174.705	246	0.489607	168.902	211	1.92132	136.279	168	1.0971	141.902	191	1.45852	157.459	190	1.14183	125.033	147	1.17136	146.705	192	1.39444	124.574	149	0.816026	125.574	155	1.21131	142.885	190	1.44384			119.066	148	0.527092
178.23	248	0.672736	143.59	170	1.05828	136.295	174	1.0995	127.59	159	1.12223	166.672	231	1.29284	124.607	173	0.825694	141.525	185	0.848032	134.066	168	0.749498	134.77	183	1.46054	155.639	211	1.74712			119.082	148	0.528222
130.098	161	1.01857	152.246	188	1.36935	136.311	178	1.15621	135.623	193	0.992034	166.885	242	0.916459	127.525	172	0.875723	145.148	179	1.18562	134.557	163	1.11444	143.344	180	1.68705	126.148	148	1.05576			119.148	148	0.528995
139.492	172	1.5595	139.377	183	0.864773	136.344	183	1.10821	137.984	169	1.09959	163.23	224	1.33287	125.279	152	1.15345	138.344	179	1.16319	134.869	182	0.984841	145.557	192	1.82144	141.852	175	1.62617			119.197	148	0.52934
184.705	229	0.740506	159.393	206	1.14392	136.393	193	0.963782	122.557	157	0.818779	168.541	210	1.1578	132.295	165	1.29667	148.049	202	1.07447	143.525	179	1.19764	132.164	164	1.19255	157.049	213	1.73701			119.23	148	0.529459
142.82	182	0.975588	180.197	248	1.41305	136.393	174	0.914523	128.77	156	1.12148	160.689	218	1.13334	130	160	1.04651	151.443	185	1.28208	129.131	169	0.779207	156.377	209	1.54094	148.016	195	1.73846			119.246	148	0.530347
143.344	197	1.32609	152.262	193	1.55503	136.41	163	1.01949	116.426	148	0.724277	165.82	231	0.946328	137.23	191	1.41805	158.344	203	1.72066	119.77	145	0.885395	142.279	193	1.3935	161.77	206	1.75507			119.262	148	0.530615
140.918	183	1.03705	146.574	202	1.34914	136.41	164	0.871669	122.393	161	0.885484	172.574	230	1.06211	117.689	152	0.758854	175.623	255	1.8271	128.721	160	1.11598	140.59	187	1.61699	142.689	175	1.39186			119.279	148	0.531335
138.295	178	1.40476	177.656	246	1.35225	136.557	174	1.04801	113.918	153	0.726493	157	191	1.55493	123.148	153	0.764653	165.951	208	1.82878	136.066	183	1.30667	132.672	169	1.46277	124.869	174	0.899473			119.279	148	0.532897
143.426	194	1.33877	146.049	199	0.978434	136.639	180	1.47604	124.951	165	1.10811	158.328	223	0.896754	137.016	176	1.6793	145.902	181	1.0112	135.115	179	1.18361	133.098	163	1.30261	137.459	199	1.26162			119.328	148	0.533141
191.475	241	0.746732	166.508	206	1.46453	136.639	173	0.761287	120.41	153	0.986404	164.393	217	0.893837	125.164	156	0.9284	162.984	222	1.80689	143.311	178	1.47151	145.016	199	1.4057	144.148	191	1.29139			119.328	148	0.533601
188.311	256	1.4599	174.426	227	1.53829	136.689	170	1.42879	123.066	161	0.813842	177.705	252	1.05533	125.311	151	0.881447	157.721	236	1.43243	120.246	149	0.864215	161.557	214	1.7168	135.049	186	1.41615			119.328	148	0.535801
162.82	203	0.670303	194.557	243	1.29522	136.738	173	1.2712	123.934	170	1.00767	154.689	202	0.710135	115.18	142	0.726429	149.18	182	1.1238	126.115	166	1.13208	139.377	193	1.20795	146.803	192	1.57949			119.344	148	0.536986
190.738	275	1.11296				137.049	174	0.849408	121.328	156	0.732827	168.443	219	0.875791	119.426	146	0.608719	148.131	185	1.14658	121.213	149	1.0023	125.623	162	1.07216	143.508	187	1.28732			119.361	148	0.537593
223.656	273	0.568806				137.066	181	0.933144	128.197	170	1.06259	156.344	204	0.970333	114.656	140	0.491426	140.279	178	0.98121	160.016	220	1.74894	132.574	168	1.22337	149.918	200	1.93511			119.377	148	0.537657
121.197	156	0.878347				137.213	172	1.14922	150.541	193	1.63655	172.672	238	1.25503	125.361	157	0.798277	149.033	179	1.36587	120.049	153	0.651567	141.557	188	1.24097	141.656	194	1.2576			119.393	148	0.537956
216.098	281	0.481003				137.279	193	1.1666	133.705	177	1.40963	157.148	232	1.17642	126.803	163	0.895735	139.049	174	0.63782	141.672	186	1.23988	143.164	200	1.50506	135.525	173	1.09293			119.41	148	0.538735
204.59	297	1.68825				137.295	175	1.0979	122.066	166	0.91733	165.656	224	0.948031	123.066	143	0.792193	156.344	243	1.44933	121.934	157	0.805975	139.049	174	1.24315	135.541	177	1.21506			119.426	148	0.539022
141.59	183	1.35448				137.426	172	0.998438	124.557	159	0.60865	178.541	250	0.99131	132.689	199	1.02516	143.459	187	0.917966	120.279	157	0.660598	130.541	179	1.07158	136.639	177	1.17928			119.426	148	0.539548
160.803	206	1.08298				137.426	183	1.15161	132.41	182	1.15647	162.82	236	0.854644	137.59	177	1.28928	136.328	163	1.11949	132.689	172	0.783946	153.639	200	1.46058	142.787	218	1.22535			119.426	148	0.539845
157.721	217	1.76206				137.689	173	1.14595	132.246	168	0.876264	154.656	209	0.577779	121.213	156	0.758649	137.311	171	0.988283	133.77	178	1.14314	127.902	163	1.02836	122.59	150	0.855413			119.426	148	0.539873
133.443	175	0.786248				137.721	167	1.80528	125.295	158	0.73367	160.164	213	1.08518	121.951	161	0.812511	159.492	207	1.75151	127.164	160	1.03242	153.82	212	1.57226	146.475	186	1.63445			119.443	148	0.539987
133.393	176	0.940717				137.77	190	0.874517	131.738	176	1.35274	176.902	226	1.10665	124.295	146	0.418374	158.951	210	1.55158	144.689	195	1.42498	133.754	191	1.23432	138.066	169	1.46884			119.475	148	0.540423
141.082	177	1.06423				137.82	167	0.922003	128.033	166	1.00558	128.705	202	1.10014	122.016	151	0.692636	138.656	176	1.07986	128.246	160	0.713344	129.098	162	1.12739	132.066	159	1.15791			119.508	148	0.54066
153.557	199	0.559819				137.902	177	1.04146	139.623	181	1.49121	154.803	203	1.51589	119.984	145	1.04624	165.344	219	1.31137	135.77	164	0.796868	123.918	158	0.691799	150.328	200	1.71737			119.541	148	0.542202
147.426	187	1.0688				137.951	181	1.15242	132.262	164	0.687495	138.902	192	1.49657	117.344	165	0.615027	152.098	198	0.993278	133.475	163	0.777663	129.607	177	1.0018	151.164	198	1.65279			119.541	148	0.544184
173.213	220	1.35702				138	184	0.833314	129.311	195	0.853731	142.492	210	1.35888	119.279	155	0.454828	148.41	194	1.1059	124.295	158	0.713756	145.443	191	1.58225	141.361	181	1.50253			119.557	149	0.544984
146.033	181	1.37528				138.082	177	1.09167	126.525	162	0.955055	130.164	158	0.924552	119.705	150	0.539987	151.803	184	1.79929	132.459	164	1.4748	141.984	188	1.72774	141.984	175	0.986797			119.574	149	0.545036
140	174	1.02004				138.082	165	1.13878	132.951	176	1.17069	149.377	198	1.58182	119.541	145	0.443196	145.82	176	0.99158	126.656	160	0.799472	154.754	207	1.71492	149.377	198	1.27302			119.59	149	0.545181
148.049	187	1.22681				138.115	162	0.957074	123.82	167	0.693181	138.689	173	1.16146	115.492	152	0.564887	143.803	176	0.812761	146.098	179	1.41608	146.869	190	1.76071	130	179	0.942777			119.607	149	0.545831
153.541	204	0.652273				138.131	186	0.775906	125.852	156	0.653932	146.426	181	1.58731	125.18	185	0.658819	140.508	178	2.16872	126.475	162	0.974402	126.492	182	0.743421	125.607	166	0.812249			119.656	149	0.546362
162.574	207	0.885734				138.18	190	0.801423	139.279	178	0.977147	139.049	187	1.12699	124.803	154	0.957208	130.721	168	1.91956	139.426	182	1.4848	130.098	182	1.00999	129.918	179	1.08828			119.689	149	0.547434
151.754	199	1.6571				138.23	182	1.46184	132.525	172	1.03793	133.689	173	0.959263	130.049	155	0.472775	170.787	220	1.55118	121.885	154	0.684239	132.41	156	1.55529	125.475	157	0.929266			119.689	149	0.548604
134.525	161	1.21368				138.246	208	1.05117	132.934	166	0.781141	148.574	215	1.36548	145.443	219	1.42868	160.492	210	1.21876	132.967	166	0.817609	134.23	171	1.4638	132.951	164	1.02756			119.705	149	0.550772
138.426	172	1.20749				138.262	172	0.727265	130.803	159	0.842491	142.918	191	1.06966	129.18	171	0.648121	155.033	205	1.13596	123.197	159	1.00355	139.77	193	1.34595	146.77	204	1.31693			119.721	149	0.553439
139.852	184	0.98552				138.279	179	0.657154	134.59	176	0.771322	148.59	204	1.44144	127.918	159	0.994606	146.164	179	1.2161	119.475	142	0.888629	140.82	191	1.3712	132.787	167	1.09454			119.77	149	0.553609
179.082	214	1.17931				138.328	177	1.26852	127.361	157	0.657114	134.885	165	1.20452	130.885	158	0.743864	129.984	168	1.31782	128.967	164	0.631477	128.492	169	1.43433	128.918	171	1.1589			119.77	149	0.553677
148.328	200	1.41561				138.344	188	0.8818	130.607	161	1.1057	143.967	191	1.40672	145.934	198	1.91223	158.984	220	1.58009	128.803	157	1.24917	137.639	186	1.19	125	154	0.797779			119.787	149	0.554422
158.705	200	0.90462				138.377	180	0.770725	143.607	179	1.21649	134.59	170	1.00123	117.082	146	0.604598	134.967	166	0.668192	121.492	155	0.883973	130.246	157	1.02337	133.213	169	1.19443			119.803	149	0.554538
156.098	202	0.814358				138.443	176	1.33077	127.279	168	0.798015	126.803	172	1.10867	128.672	171	1.1261	177.525	239	1.74244	129.623	173	1.3224	127.246	188	1.09895	137.131	174	1.28927			119.803	149	0.555265
160.459	192	0.714081				138.475	184	0.890491	120.475	157	0.624863	130.148	189	1.00451	137.344	174	0.940679	148.377	226	1.06241	153.836	200	2.02496	126.82	166	0.887307	129.984	165	1.08101			119.885	149	0.555456
131.18	173	1.41387				138.508	176	0.869057	127.902	156	0.97446	156.393	197	1.68795	128.148	166	0.789567	141.393	177	0.87348	134.393	174	1.21164	138.213	185	1.37423	134.902	178	1.18035			119.918	149	0.555937
162.656	196	1.00433				138.574	180	0.849687	132.607	162	0.931566	127.574	169	0.887945	133.492	169	1.37319	138.721	171	0.770678	134.098	179	1.33325	124.705	149	1.19914	125.607	153	0.831236			119.934	149	0.559819
129.508	159	1.02191				138.607	166	0.834122	130.656	169	1.25399	124.197	159	1.07622	141.508	172	1.05055	161.049	212	1.40392	124.131	164	0.639563	130.393	169	1.33934	133.754	160	1.01138			119.951	149	0.56052
164.459	225	0.860314				138.639	167	1.33632	136.361	179	1.11266	165.082	226	1.64026	142.213	199	1.50793	182.689	255	1.8083	138.918	200	1.26127	128.049	172	0.875549	126.902	162	0.74371			119.951	149	0.563312
152.23	189	1.22787				138.656	168	1.22474	132.967	172	1.00188	149.361	192	1.32056	131.803	168	1.32944	147.279	184	1.33235	134.18	173	0.791378	143.393	170	1.8326	145.902	190	1.76864			119.967	149	0.564094
162.787	195	0.834061				138.705	176	1.75523	127.885	168	0.813101	125.328	164	0.92623	121.492	159	0.568175	139.197	193	0.847227	129.951	168	1.14198	122.049	151	0.937157	121.295	150	0.816936			119.967	149	0.564887
161.295	213	1.64048				138.721	176	0.873243	126.115	156	1.04663	133.393	166	1.0406	121.082	142	0.899029	140.279	177	1.07703	124	156	0.618752	128.623	150	0.790622	135.082	176	1.30238			119.984	149	0.564906
131.836	170	0.952841				138.721	170	1.52112	129.803	157	1.09341	144.295	188	1.29199	127.754	172	0.963209	152.623	195	1.33928	132.672	173	1.45702	129.311	159	0.933264	147	188	1.87588			120.016	149	0.565374
127.262	168	2.40752				138.738	176	0.834597	130.902	168	1.06712	130.852	166	0.879625	123.689	152	0.865463	146.098	192	1.02956	128.508	161	1.21036	152.033	189	1.79347	139.246	179	1.48709			120.016	149	0.565535
138.705	180	1.12025				138.754	185	1.1576	139.279	184	1.05137	130.77	163	1.1257	117.164	145	0.627497	150.492	182	1.32625	121	165	0.722065	131.344	163	1.00028	131.951	166	1.08958			120.033	149	0.566637
150.098	184	1.10684				138.82	179	1.24518	127.016	176	1.02461	143.803	185	1.55303	124.705	168	0.711247	152.672	205	1.47987	122.082	145	0.833991	122.934	159	0.893485	150.082	200	1.60346			120.033	149	0.567145
134	163	1.42201				138.902	165	1.24186	131.426	171	0.828223	145.508	205	1.3881	121.361	151	0.638828	132.459	172	0.595841	123.148	144	0.809036	138.885	180	1.3128	126.721	160	1.18786			120.033	149	0.567431
156.754	200	1.33036				138.918	181	1.09342	137.574	172	1.19022	165.197	226	1.83395	131.098	167	0.98574	142.639	171	0.701605	134.049	180	1.18292	129.738	177	1.11067	130.656	163	1.0024			120.049	149	0.568175
158.689	195	1.24088				138.934	174	1.53594	120.984	154	0.478411	134.754	167	0.8201	126.082	155	0.798179	163.656	213	1.97931	139.836	174	1.18455	147.443	191	1.69897	154.18	191	1.83056			120.049	149	0.568176
161.984	204	1.81253				138.951	181	0.701118	136.016	168	1.08315	148.869	217	1.41311	116.246	151	0.544984	144.82	191	1.04557	121.016	155	0.901666	131.246	173	1.22768	133.623	169	1.18991			120.066	149	0.568806
150.459	178	1.39936				138.951	179	1.4458	136.475	178	0.949519	145.393	171	1.04336	126.213	186	0.810261	138.738	173	0.777087	128.721	166	1.41107	142.344	181	1.20199	142.311	185	1.52111			120.082	149	0.568943
165.344	196	1.16747				139.066	183	1.20184	135.689	179	1.00927	144.197	184	1.40109	127.377	146	0.99824	179.475	229	1.96825	135.18	201	1.16016	130.475	158	1.34508	129.77	164	1.07793			120.164	149	0.568989
166.164	212	1.54928				139.098	186	1.32341	130.426	166	0.906494	162.902	245	1.66714	123.246	162	0.675715	131.098	161	1.03153	135.377	172	1.39745	131.525	178	1.16908	136.672	170	1.41388			120.18	150	0.569758
142.23	186	0.944431				139.115	181	1.38747	123.525	157	0.698904	145.803	185	1.30299	123.918	150	0.806286	133.082	167	0.977249	141.262	206	1.22595	139.246	171	1.3788	131.279	172	1.06951			120.213	150	0.570682
132.885	176	1.18749				139.148	183	1.28547	123.492	153	0.70402	127.787	170	0.868871	144.934	187	1.45639	152.623	221	1.43017	114.066	139	2.19449	134.656	172	1.41145	127.262	161	1.09373			120.246	150	0.571708
139.852	181	0.921629				139.197	185	1.24954	133.672	174	1.10265	153.033	190	1.3927	137.246	161	1.37966	133.77	165	0.873101	123.131	154	0.893714	125.475	148	1.0292	124.508	169	0.965322			120.279	150	0.571921
142.967	180	1.01222				139.23	184	0.714002	126.738	169	0.882364	162.557	206	1.45031	128.033	160	0.923984	140.656	171	0.846138	126.787	155	1.17964	134.23	180	1.25738	135.213	183	1.47656			120.295	150	0.571951
182.934	234	1.57642				139.295	176	1.58153	126.213	158	0.862052	155.049	205	1.73206	128.262	171	0.832099	139.951	178	0.895452	130.607	165	0.80253	132.361	160	1.20034	128.311	172	0.971873			120.328	150	0.572714
141.115	169	1.07988				139.311	174	0.834207	126.639	159	0.933261	141.984	197	1.28438	126.41	164	1.04484	140.541	182	1.10328	141.918	188	1.16529	145.18	193	1.57018	133.705	176	0.931942			120.41	150	0.573558
150.148	194	0.830237				139.311	182	1.19411	143.131	181	0.736395	138.361	174	1.15549	148.492	194	1.46429	139.59	172	1.59912	146.623	178	1.50684	138.934	174	1.55765	125.607	163	0.76606			120.475	150	0.57403
151.885	199	1.5879				139.41	176	1.03336	123.836	166	0.709673	134.852	169	1.03976	126.934	153	0.961365	151.787	189	1.2472	135.23	180	0.977113	124.689	154	0.976993	137.984	184	1.44962			120.475	150	0.574277
160.656	205	1.09859				139.574	212	1.35453	135.393	175	1.31497	155.869	237	1.52989	126.754	176	0.754263	135.131	176	0.82984	136.082	163	1.381	146.311	202	1.37303	141.328	202	1.32581			120.475	150	0.574612
151.984	204	0.454981				139.672	193	1.15247	139.836	190	1.02863	132.82	176	0.877213	140.23	171	1.25337	134.082	169	1.18155	129.574	164	0.828793	132.18	184	1.08822	129.426	160	1.05381			120.475	150	0.57489
152.131	190	1.02845				139.77	173	0.73957	132.262	179	1.09291	142.836	175	1.19118	135.049	177	0.574277	152.377	210	0.728604	125.328	157	0.903775	136.836	172	1.66705	128.148	166	1.43608			120.525	150	0.576631
142.967	177	1.05518				139.82	182	1.52097	129.623	168	1.13798	162.475	227	1.55203	123.967	144	1.20753	143.082	184	0.766333	141.459	204	1.58571	149.918	200	1.66959	118.984	160	0.687617			120.574	150	0.577779
151.672	199	0.741527				139.869	184	1.14266	123.902	162	0.873995	182.738	264	1.74308	131.016	160	1.16197	143.721	190	1.17082	139.066	171	1.35821	128.213	172	0.980754	130.016	165	0.841094			120.574	150	0.57782
154.902	201	1.33372				139.951	174	1.27417	155.197	214	1.08453	170.738	272	1.575	134.459	177	0.636436	148.164	191	1.29367	168.672	249	1.61169	130.557	161	1.16291	136.311	173	0.999973			120.574	150	0.578849
144.918	194	0.778708				139.984	192	1.25597	133.213	162	1.19506	155.787	207	1.61947	139.41	186	0.984401	150.082	201	0.976386	123.541	151	0.861055	131.475	170	1.00233	159.77	224	1.46541			120.59	150	0.578929
218.328	275	2.01685				140.066	181	1.61239	133.541	178	1.02602	157.902	207	1.71491	121.508	151	0.639051	156.18	197	1.69188	142.705	193	1.50885	134.197	187	0.96162	136.918	170	1.07247			120.607	150	0.578982
163.475	222	1.15953				140.082	193	1.1162	128.574	162	1.06432	156.803	210	1.54116	135.41	169	0.679922	145.77	179	1.15094	125.164	166	0.904639	133.557	172	1.069	130.738	169	0.878726			120.738	150	0.57899
168.639	257	1.27693				140.131	170	1.37521	121.672	155	0.81349	164.738	207	1.80995	129.77	163	0.894998	149.951	179	0.825794	141.459	183	1.20777	128.098	184	0.922394	154.852	235	1.56088			120.754	150	0.579446
151.607	200	0.697515				140.18	186	1.18552	132.475	169	1.33071	183.902	264	1.66325	121.131	154	0.609106	157.508	199	1.33358	130.033	162	0.927599	136.426	180	1.26073	132.426	182	1.26494			120.754	150	0.579488
178.131	262	1.59658				140.279	170	0.904556	129.77	171	0.886024	132.836	170	0.878606	121.426	156	0.720812	154.672	189	1.78347	125.705	155	1.18344	138.525	172	0.8021	137.164	204	1.08211			120.754	150	0.579581
169.279	203	1.28277				140.295	183	0.834293	131.311	170	1.13749	148.361	199	1.28591	128.672	172	0.986049	138.115	175	1.14673	126.016	159	0.962565	134.246	170	1.37334	125.033	164	0.928185			120.787	150	0.580401
160.557	201	1.12121				140.328	211	1.1584	123.934	166	0.609161	150.574	191	1.40356	144.361	203	1.23796	173.934	238	2.01291	132.377	169	0.964701	123.59	154	0.770428	128.115	162	1.21166			120.803	150	0.580962
177.967	222	1.21989				140.344	177	1.021	128.459	173	0.763825	154.967	203	1.14347	135.738	160	0.64475	161.918	204	1.39596	128.885	162	0.77535	133.148	169	1.00077	144.41	195	1.61906			120.803	150	0.58108
158.82	210	1.9751				140.361	175	1.57497	133.295	179	0.990439	148.787	208	1.3483	140.787	180	0.920882	160.492	213	1.486	132.885	170	1.13368	126.623	178	0.860222	132.738	178	0.783187			120.82	150	0.581821
182.902	223	1.34265				140.393	202	1.49946	131.82	165	1.26534	151.361	205	1.40474	146.77	192	1.03232	169.885	208	1.95737	129.23	162	1.107	136.295	179	1.05418	131.426	177	0.839131			120.82	150	0.584068
164.148	209	1.11569				140.426	177	1.26285	134.754	164	1.18263	143.049	186	1.34341	134.295	175	0.536986	181.049	237	1.35842	127.721	162	1.04389	138.754	187	1.43016	142.328	188	1.26328			120.82	150	0.585374
148.557	185	0.618017				140.426	196	1.11837	132.721	169	1.25156	168.475	284	1.63503	128.41	169	0.93571	186.492	247	1.53387	120.754	151	0.56052	131.984	169	1.106	129.197	160	1.07396			120.82	150	0.586584
158.361	196	0.682392				140.443	200	1.26525	133.721	170	1.12615	168.262	208	1.76339	128.262	164	1.10901	159.279	191	0.88071	137.787	176	1.31509	142.541	174	1.43066	127.623	168	0.811673			120.82	150	0.587252
178.541	214	1.39179				140.492	177	1.12659	133.295	168	1.34753	139.672	210	1.1447	126.59	156	0.453453	142.721	181	1.10223	141.033	184	1.31356	160.77	238	1.7074	154.836	202	1.67512			120.836	150	0.587409
169.721	215	1.3149				140.508	200	0.87226	131.984	199	1.29214	126.607	161	0.832529	136.082	168	0.947761	159.59	200	1.55081	121.393	150	0.71605	126.934	159	0.899154	147.475	190	1.72536			120.885	150	0.587684
188.115	265	1.33055				140.623	168	1.16529	140.361	198	1.25725	150.311	212	1.56649	137.459	171	0.922665	150.721	202	1.13695	122.098	147	0.752077	129.213	165	0.841337	135.377	176	1.10278			120.885	150	0.588182
157.672	193	1.36173				140.656	192	1.12033	133.115	165	0.947579	139.279	171	1.10633	140.656	190	1.04661	152.246	197	0.712952	127.148	156	1.02562	130.18	159	1.18103	133.18	177	1.0973			120.934	150	0.588483
149.754	180	1.29619				140.689	176	1.34961	124.656	154	0.813177	134.869	169	0.878647	129.508	154	1.11867	149.033	185	1.04181	128.754	164	1.21609	122.59	163	0.891574	124.689	164	0.894651			120.984	150	0.589354
147.902	173	0.880599				140.836	167	0.870632	126.049	153	0.554538	151.393	197	1.48568	131.656	163	0.521344	155.803	211	1.80553	142.984	208	1.15972	128.787	174	1.15043	130.951	170	0.987702			121	150	0.589446
163.098	196	0.837263				140.902	175	1.34533	131.557	174	0.963156	133.934	171	0.758164	117.607	146	0.591728	146.656	175	1.01795	130.918	168	1.17518	121.754	152	0.771863	138.279	178	1.29136			121	150	0.589488
145.967	189	1.14197				141	185	1.0156	126.934	169	0.790221	129.279	163	0.647588	132.311	189	0.986685	134.705	165	1.0789	144.721	194	1.341	134	168	0.933085	159.393	223	1.46525			121.016	150	0.589936
164.197	201	1.13454				141.033	179	1.21548	122.836	161	0.816677	142.246	209	1.19326	121.492	158	0.660409	141.836	198	1.19298	127.213	158	1.1242	140.443	178	1.42594	126.098	160	0.811341			121.016	150	0.591405
155.066	196	1.26343				141.066	187	1.01246	126.574	161	0.897544	140.459	190	1.04455	145.18	197	1.29232	143.77	184	1.35287	144.59	204	1.48587	144.377	189	1.41744	142.689	191	1.2383			121.016	150	0.591491
177.885	219	2.00327				141.082	190	0.709117	136.082	179	1.3201	136.23	178	0.782208	150.869	189	1.32402	132.918	163	0.941034	124.295	156	0.748369	132.361	163	0.869126	152.377	196	1.63591			121.033	150	0.591579
174.148	217	2.47236				141.115	180	0.796716	139.705	190	0.821009	147.098	225	1.15979	139.885	171	1.16822	132.344	157	1.11334	147.852	183	1.749	140.049	187	1.48149	127.721	160	0.732104			121.049	150	0.591728
164.836	228	1.03104				141.115	169	1.41291	138.934	168	1.0411	144.426	197	1.21217	135.328	176	0.476051	147.033	184	1.32485	129.164	162	1.05992	133.967	175	1.09726	154.803	200	1.40641			121.066	150	0.592042
165.885	203	0.833287				141.164	178	1.05309	130.295	164	0.886837	148.836	195	1.53098	132.459	163	0.723607	158.328	240	1.66668	134.787	177	1.39158	131.885	175	0.919623	128.213	175	0.91387			121.066	150	0.592559
182.934	243	1.94085				141.344	177	0.711667	157.656	197	1.75083	135.426	161	1.43671	134.918	177	0.825223	123.574	161	1.01028	133.016	166	1.13748	131.689	167	0.959502	149.41	213	1.35459			121.082	150	0.593749
172.934	249	1.19285				141.377	191	1.09134	144.262	204	1.3277	129.23	171	0.800458	128.344	152	0.378817	139.525	188	1.23924	126.148	160	0.615834	131.066	165	1.48104	130.934	166	0.906556			121.098	150	0.593971
167.164	202	1.57197				141.492	200	1.18606	125.459	166	0.948942	138.443	171	1.08116	121.246	153	0.734272	136.164	168	1.22384	129.967	155	1.13402	123.803	156	0.945305	144.115	180	1.5543			121.115	150	0.594062
155.18	196	1.24991				141.492	208	1.0692	126.967	155	1.09756	135.459	172	0.993256	117.426	143	0.565535	145.59	224	1.38824	130.033	169	1.16449	132.852	170	0.956908	139.525	177	1.38527			121.131	150	0.594515
186.262	238	2.37802				141.508	191	0.709103	139.41	180	1.39218	154.689	196	1.64299	128.557	168	0.777346	137.098	170	1.32393	123.475	159	0.920109	122.885	158	0.778725	149.23	208	1.5933			121.131	150	0.595268
189.623	227	1.37358				141.574	191	0.951455	129.23	158	0.747863	156.951	204	1.86782	125.852	160	0.624387	152.852	196	1.67994	129.918	166	1.09004	124.934	157	0.947003	152.852	203	1.448			121.164	150	0.595602
190.623	246	1.17513				141.574	185	1.15045	140.246	190	0.97629	139.246	178	1.37878	121.557	146	1.19347	131.541	160	1.23199	126.361	153	0.945129	147.23	203	1.69384	127.361	164	0.957245			121.18	150	0.595841
151.984	186	1.12687				141.672	180	0.708682	145.098	176	1.87613	128.689	154	0.897078	120.049	151	0.735183	128.295	167	0.95055	140.492	167	1.5645	143.508	189	1.30894	144.82	192	1.37192			121.18	150	0.596589
153	192	0.922565				141.721	178	1.22203	127.967	168	0.931877	141.984	183	1.43679	127.623	167	1.04406	140.131	188	1.22165	126.623	162	1.158	139.459	187	1.25995	146.967	224	1.35091			121.197	151	0.59707
150.361	205	0.68755				141.82	170	0.899791	138	191	1.44466	145.23	184	1.65543	145.066	190	1.28776	129.607	172	0.893569	143.492	190	1.52267	129.574	174	1.02327	139	176	1.01132			121.213	151	0.597163
166.246	202	1.39852				141.852	174	0.897117	123.721	153	0.917102	135.918	170	1.06756	133.197	162	1.51042	147	210	1.45437	127.82	153	0.674616	123.23	150	0.847774	137.443	171	1.05213			121.213	151	0.597712
167.508	226	1.02748				141.951	191	1.16156	124.213	156	0.508744	133.803	168	0.918833	145.41	185	1.30024	134.607	185	1.22374	125.393	157	1.18597	153.541	196	1.76335	128.885	160	0.765667			121.213	151	0.598067
156.098	193	1.04728				141.951	171	0.866385	127.033	158	0.807067	157.902	194	1.17174	136.672	177	0.935152	125.639	166	0.944487	135.721	172	1.49209	128.492	170	1.03906	134.852	185	1.04263			121.213	151	0.598387
163.836	209	1.29478				141.967	189	1.03574	129.426	164	0.78314	144.77	183	1.3444	128.328	151	0.916502	132.426	179	1.10724	130.984	174	0.995118	127.705	163	0.915918	146.18	189	1.45544			121.246	151	0.598586
153.279	191	0.843409				141.967	179	1.2176	132.738	154	1.35124	159.738	209	0.875713	135.951	169	0.802026	135.131	184	1.09815	144.885	181	1.71721	136.656	198	1.38031	126.934	158	0.982837			121.246	151	0.599065
146.541	177	1.25026				142.033	182	1.23108	129.951	163	1.10357	178.197	238	1.53625	134.525	171	0.718936	130.623	176	0.917775	139.754	178	1.36315	121.951	154	0.914888	132.508	203	0.917847			121.279	151	0.599756
156.164	214	0.76969				142.066	187	1.01497	121.754	149	0.935335	142.344	172	1.06099	134.77	170	0.680766	133.934	171	1.27269	144.885	187	1.47695	131.066	176	1.04597	148.557	225	1.29046			121.279	151	0.599879
156.279	195	0.960188				142.066	175	1.35426	125.869	153	0.833179	155.246	205	0.519313	123.951	157	0.934933	133.18	169	1.01023	129.902	166	1.02351	136.77	168	1.20447	145.066	184	1.83674			121.295	151	0.600069
144.689	176	1.31125				142.213	191	1.3304	126.164	165	0.843382	159.049	208	1.47756	122.148	154	0.518576	142.066	186	1.09736	126.951	166	1.05926	143.754	200	1.50661	131.869	170	0.891586			121.295	151	0.600825
165.426	210	1.11073				142.311	182	1.10772	132.574	186	1.04148	152.016	200	0.757157	127.492	150	0.862759	150.361	199	1.27696	146.689	187	1.45651	126.672	169	1.02927	152.984	243	1.28086			121.295	151	0.601536
152.049	185	0.775205				142.328	171	0.788717	123.738	154	0.732292	172.967	230	1.31692	141.443	190	0.876326	130.361	154	0.860527	123.344	162	0.646951	121	154	0.668031	142.328	210	1.32958			121.328	151	0.602037
161.705	216	1.04697				142.377	176	1.19115	128.902	170	0.954314	156.607	205	1.45307	141.082	184	1.07719	131.213	166	0.62518	124.18	152	0.809727	126.311	170	0.989482	151.131	230	1.32057			121.328	151	0.602397
159.607	200	0.646528				142.377	180	0.799957	171.885	265	1.74718	143.279	186	0.741283	126.426	181	0.524747	134.492	166	0.973065	145.23	197	1.44834	134.475	169	1.61923	138.295	182	1.38867			121.328	151	0.603
157.852	194	1.31225				142.459	186	0.965214	126.475	185	0.574612	200.525	265	1.93989	131.852	156	0.959568	137.426	170	0.986058	129.508	169	0.899119	128.393	159	1.15717	128.148	160	0.90509			121.344	151	0.603499
154.951	215	0.966237				142.492	175	1.45084	131.246	167	1.05344	142.459	175	0.770159	147.393	193	1.31114	138.213	183	0.969129	133.066	162	1.11534	127.934	165	1.10328	151.672	218	1.24711			121.361	151	0.604598
161.672	203	0.68564				142.541	185	0.950488	129.23	156	0.565374	149.492	187	1.14205	134	171	0.719223	138.967	190	1.20139	140.885	175	1.36015	127.574	158	1.05289	140.852	185	1.32091			121.361	151	0.604811
165.311	210	1.32743				142.541	174	1.06234	120.885	167	0.656591	172.475	216	1.60729	133.623	163	0.901434	129.131	171	0.643346	151.623	197	1.18168	124.869	171	0.7156	128.082	165	1.03113			121.393	151	0.604856
171.197	216	1.32623				142.623	185	1.04532	141.164	176	1.27379	152.279	213	1.22183	132.164	175	0.715756	135.295	173	0.823984	138.443	191	0.992343	124.984	159	1.04447	162.754	237	1.80365			121.41	151	0.605497
168.459	238	1.31901				142.672	183	1.08451	121.049	149	0.603	155.721	216	1.31321	131.541	169	1.31328	142.049	178	1.47319	150.426	204	1.4605	127.902	163	1.08053	140.672	180	1.25768			121.41	151	0.605506
159.984	228	0.901735				142.721	190	1.37935	127.918	160	0.634398	158.41	219	0.884182	127.344	177	0.679076	155.361	194	1.25824	122.475	154	0.699226	129.623	166	0.765384	160.049	221	1.72073			121.426	151	0.605741
159.459	203	1.16274				142.77	183	0.837954	131.213	161	0.613455	154.672	198	1.27937	134.656	168	0.63279	148.934	210	0.906099	118.934	149	0.764907	126.77	159	0.957472	133.426	163	0.974694			121.426	151	0.605825
163.115	214	1.2538				142.803	183	1.11171	145.77	192	1.59586	168.672	228	1.60965	137.639	185	0.898033	149.262	191	0.698553	131.262	170	0.914921	150.475	185	1.14534	128.295	169	1.0275			121.426	151	0.60638
143.902	170	0.936002				142.82	187	1.09274	133.59	167	1.07896	164.246	211	1.73359	139.131	186	0.923306	140.902	180	1.41602	140.787	190	1.68458	133.836	167	1.69111	146.885	196	1.4018			121.426	151	0.607006
129.262	165	0.613597				142.82	174	0.903355	152.098	196	1.84511	152.934	203	1.23827	127.902	158	0.946664	134.803	176	0.856755	126.164	165	0.763484	127.885	155	1.23542	128.377	174	1.06347			121.475	151	0.607327
161.934	200	1.45533				142.852	185	0.778112	121.541	149	1.05508	151.492	212	1.03631	136.689	177	1.2504	133.328	163	0.782491	133.77	181	1.2453	119.508	164	0.859552	131.77	171	0.871655			121.492	151	0.60803
150.803	213	0.805069				142.869	184	0.984849	121.934	165	0.84969	136.279	171	1.00968	125.984	159	0.57782	134.689	180	1.11979	128.279	161	0.817254	140.131	199	1.31423	131.852	171	0.89334			121.492	151	0.60865
155.262	190	0.888759				142.885	186	1.08971	131.852	181	1.29478	141.59	174	0.896624	150.607	203	1.60043	136.459	172	0.88799	125.279	150	0.821337	127.557	155	0.963181	130.361	169	0.808319			121.492	151	0.608719
149.852	199	0.457132				142.918	189	1.34814	124.639	169	0.7174	141.262	171	0.9031	136.459	174	0.516135	159.016	218	1.41281	126.77	160	1.10109	119.689	170	0.820829	142.508	189	1.70396			121.492	151	0.609106
153.213	193	0.643639				142.967	188	1.18782	130.82	166	0.898125	165.803	202	1.59762	130.672	175	0.644671	146.984	206	1.39605	129.262	174	0.801749	138.852	175	1.51639	124.082	154	0.914351			121.508	151	0.609161
146.59	186	1.28813				143.066	180	1.56177	121.508	143	0.873876	145.492	213	0.706368	122.23	146	0.49163	149.033	192	1.61831	130.541	174	0.831938	144.148	213	1.64589	135.328	168	1.66725			121.508	151	0.609736
154.59	182	0.714467				143.148	176	1.11155	123.082	153	0.690499	147.459	213	0.864917	127.066	163	0.695959	147.033	200	1.2683	118.557	166	0.607006	122.689	159	0.968079	143.262	196	1.60217			121.525	151	0.60996
140.066	169	1.11091				143.23	192	1.10486	157.164	210	1.66733	142.18	200	1.18883	130.082	169	0.632252	134.049	180	0.897698	120.328	147	0.787253	130.787	186	1.28639	127.115	205	0.804258			121.541	151	0.61078
161.377	223	1.75045				143.23	185	1.54332	119.721	150	0.695979	144.59	198	1.33052	126.902	167	0.8386	133.672	168	0.83385	139.934	178	1.35684	116.738	145	0.91062	126.475	166	0.954753			121.557	151	0.6111
161.738	206	1.41332				143.295	213	1.31548	124.033	164	0.852649	151.197	186	1.51206	140.508	183	1.00777	132.246	177	0.762284	145.459	184	1.34608	141.115	194	1.39332	139.934	180	1.31203			121.557	151	0.611493
158.508	202	0.719259				143.328	177	0.94613	128	179	1.22451	142.836	182	1.3052	132.18	165	0.721234	140.885	196	1.28981	121.066	172	0.692599	124.656	167	1.13942	135.016	170	1.22117			121.557	151	0.611873
153.344	201	1.15604				143.344	186	0.971156	125.59	156	0.978026	148.148	184	1.14344	133.721	172	0.568943	134.557	205	1.28608	132.656	163	1.08849				149.246	195	1.52989			121.574	151	0.612009
161.246	235	1.41552				143.361	185	1.11569	127.803	169	0.776174	137.131	183	0.906165	135.902	179	1.1275	122.066	164	0.929949	132.574	169	1.13854				130.787	175	1.16556			121.59	151	0.613455
188.82	225	1.7889				143.377	175	1.37939	131.131	164	1.14233	138.967	186	0.82049	117.525	141	0.60996	129.967	185	1.03947	131.41	158	0.85899				133.131	168	1.06061			121.656	151	0.613597
159.656	198	1.06567				143.426	175	0.890216	136.639	175	1.01351	146.705	186	1.1259	155.279	197	1.30947	122.328	171	0.820763	126.295	155	0.908517				148.541	190	1.69822			121.672	151	0.614528
153.148	197	0.85064				143.508	186	1.12991	138	173	0.917366	145.426	202	1.25452	140.77	187	0.801481	125.951	168	0.878743	143.738	184	1.76051				127.361	162	1.07924			121.672	151	0.614887
155.59	185	1.03823				143.59	190	1.07625	121.328	158	0.722589	138.639	194	0.677091	138.082	167	1.05848	125.557	156	1.08106	132.574	161	1.24331				147.459	182	1.96811			121.721	151	0.615003
154.885	186	0.815097				143.607	190	1.45782	138.623	176	0.793172	151.049	196	1.43752	129.197	159	0.891011	138.328	170	1.25732	134.902	182	1.16112				149.148	195	1.48978			121.721	151	0.615027
144.705	178	1.40312				143.623	188	1.18352	128.131	176	0.879636	143.213	187	1.40213	129.721	162	0.360965	137.18	195	1.33532	134.607	163	1.31485				134.361	177	1.31521			121.721	151	0.615064
149.246	187	0.694104				143.672	184	1.27398	127.885	170	0.922085	131.426	163	1.05785	149.525	188	1.68439	135.164	165	0.995973	134.623	174	1.18843				130.115	166	1.0295			121.738	151	0.615225
161.066	211	1.16667				143.82	185	1.22786	121.967	161	0.735604	131.246	175	0.771638	126.164	154	0.519632	142.77	180	1.29585	131.984	171	1.05171				126.459	161	0.961531			121.738	151	0.615834
147.164	176	0.984608				143.951	187	1.28008	129.803	161	1.00138	138.852	183	0.780356	130.246	165	0.391779	135.279	169	1.03103	128.098	159	0.895301				144.213	208	1.39201			121.738	151	0.616957
168.016	221	1.49398				144.082	174	1.26164	131.082	181	0.914046	130.311	169	0.668769	134.705	171	0.735281	135.705	183	0.853947	148.869	195	2.01106				124.574	151	0.877175			121.754	151	0.617194
150.23	184	0.866538				144.148	194	0.932905	121.721	154	0.71245	139.607	180	0.992783	126.721	162	0.745586	135.344	182	0.781887	122	152	0.600069				142	182	1.52684			121.754	151	0.617297
160.279	216	1.20289				144.262	171	0.98297	131.41	160	1.31844	145.525	183	1.42263	128.492	163	0.889336	145.197	185	1.4808	125.885	164	0.825245				138.295	189	1.37645			121.754	152	0.617489
128.393	159	0.637613				144.328	195	1.07629	130.033	158	1.21792	156.951	201	1.15032	123.426	149	1.06907	143.295	202	1.0198	150.475	207	1.51979				144.377	173	1.67303			121.754	152	0.618017
156.475	187	1.31813				144.328	170	1.77021	130.475	164	1.10538	147.557	182	1.24045	121.115	149	0.692622	140	168	0.863746	132.344	170	0.842091				129.459	163	0.862204			121.77	152	0.618526
137.738	177	1.11178				144.361	188	0.874373	124.18	151	0.908007	135.049	177	1.01992	134.623	166	0.706633	143.525	179	1.10292	132.131	167	0.897576				146.148	192	1.47244			121.77	152	0.618752
149.525	189	0.716994				144.41	196	1.2868	123.639	149	1.24217	136	177	0.879117	138.18	187	0.899456	179.279	229	1.27211	139.984	178	1.14531				154.705	188	2.05415			121.787	152	0.618865
145.197	198	0.611493				144.525	211	0.966167	129.59	168	1.24953	146.246	194	1.60437	152.246	177	2.06143	151.033	186	0.628135	140.984	178	1.24837				137.475	190	1.52415			121.803	152	0.620449
145.426	176	0.86507				144.574	192	0.863199	139.377	184	1.51652	135.016	175	2.44085	124.852	164	0.579446	160.262	224	1.44545	130.541	164	1.15187				128.426	164	0.673708			121.803	152	0.621551
154.016	190	1.0611				144.623	193	1.14002	179.803	267	1.78177	136.492	177	1.033	125.869	164	0.925056	173.508	212	0.733178	142.689	210	1.40048				130.279	172	0.945401			121.803	152	0.621669
150.869	184	1.21661				144.656	180	1.05981	125.016	160	0.915621	134.738	189	0.927567	123.607	159	0.423076	141.377	191	1.03515	139.787	179	1.32902				131.918	165	1.07541			121.836	152	0.622164
173.475	220	1.91458				144.656	184	0.766669	117.197	150	0.792517	137.18	168	1.38382	125.361	163	0.84572	159.967	203	0.78542	137.607	185	1.40196				135.918	183	1.23571			121.869	152	0.622459
147.803	178	1.05305				144.738	195	1.30337	133.377	172	1.24991	132.131	168	1.29756	122.639	151	0.86217	189.361	227	0.849986	132.656	159	1.33633				125.344	156	0.8052			121.885	152	0.623378
147.967	193	0.836727				145.016	187	1.49356	145.705	196	1.66817	163.295	222	1.68034	145.164	191	1.08096	179.656	249	0.932625	128.131	153	1.06201				135.426	183	0.981213			121.902	152	0.624387
156.131	192	0.811508				145.049	176	1.33495	121.951	149	0.856144	148.803	180	1.26142	122.541	156	0.863638	182.787	235	1.39418	131.787	166	0.866446				147.984	181	2.08906			121.934	152	0.624427
144.197	178	0.638404				145.049	176	1.30267	124.623	162	0.827426	169.18	232	1.51941	131.082	174	0.553609	191.475	270	1.32366	131.197	170	0.637846				125.328	167	1.27675			121.934	152	0.62454
151.377	202	0.916179				145.049	190	1.23992	122.311	150	0.864868	146.721	193	1.05715	133.443	170	1.47323	156.049	191	0.642293	129.23	162	0.99978				124.836	160	0.978243			121.934	152	0.624863
140.836	181	0.963191				145.115	188	1.06382	131.033	166	1.22039	146.934	180	1.02597	129.656	175	0.652389	167.77	222	0.726052	134.607	186	1.46413				138.525	207	1.19548			121.951	152	0.625114
145.902	215	0.887725				145.23	183	0.915046	134.918	168	1.81855	161.492	212	1.62164	137	177	0.735931	174.295	220	1.13449	128.295	162	1.20313				151.475	213	1.55872			121.951	152	0.625147
134.41	158	1.24707				145.328	200	1.31214	129.541	168	1.278	137.541	167	1.09862	135.607	173	0.904901	175.639	209	1.02235	134.967	169	1.08114				185.492	280	1.86639			121.951	152	0.62518
156.049	200	1.23317				145.328	213	0.8104	134.836	169	1.42192	140.344	168	1.36356	134.016	169	0.763684	171.082	227	0.775741	121.295	140	0.905513				143.984	197	1.60861			121.951	152	0.625376
163.639	199	1.72655				145.361	189	0.809581	124.574	153	0.860319	144.934	185	1.39874	130.23	171	0.622459	168.77	219	0.752724	130.098	162	0.890802				128.754	158	0.844307			121.951	152	0.625944
140.016	175	0.612009				145.377	184	1.52115	123.328	158	0.66207	130.869	161	0.86254	121.738	148	0.724426	179.426	223	1.03139	130.148	169	0.917322				144.492	191	1.52554			121.967	152	0.626044
142.508	177	1.03117				145.393	177	0.649779	139.18	172	0.99887	132.311	159	0.971506	132.426	158	0.651085	168.41	210	1.25915	124.689	155	1.01946				134.033	172	1.17155			121.984	152	0.626217
145.016	181	1.13217				145.475	200	0.952761	139.656	180	1.28818	161.164	210	1.65154	131.246	155	1.12448	136.738	177	0.738037	124.213	169	0.864295				156.754	212	1.69066			121.984	152	0.627497
152.852	191	1.23564				145.492	175	0.989596	126.197	150	1.10594	144.41	187	1.25851	116.213	147	0.45887	146.787	187	1.22977	124.328	164	0.857376				136.426	169	1.55271			122	152	0.627532
132.164	167	0.801052				145.525	184	0.944261	124.574	163	0.756279	131.557	170	0.831172	135.426	187	0.902412	143.082	175	0.744942	135.852	185	1.09397				125.246	157	0.982814			122.016	152	0.627905
129.049	169	0.680977				145.541	200	1.13499	135.77	178	1.2771	134.639	167	1.12692	132.902	182	0.720297	143.754	192	0.728715	126.426	160	1.27403				150.492	197	1.59894			122.033	152	0.628135
149.23	191	1.27584				145.672	194	1.14812	136.213	185	1.26531	138.541	172	0.798166	126.328	166	0.867481	141.82	177	1.41754	125.164	155	0.862515				143.951	176	1.79442			122.033	152	0.628581
137.672	189	0.771706				145.705	168	1.53661	128.623	164	0.705809	137.131	172	0.835092	124.918	155	0.769734	160.639	195	0.920015	136.574	168	1.45126				140.934	179	1.0254			122.033	152	0.629182
150.541	190	1.27152				145.754	176	1.79242	124.852	160	0.801102	161.459	218	1.65725	126.803	159	0.901475	166.787	205	0.920394	123.639	143	1.14477				128.607	158	1.31622			122.049	152	0.630041
145.377	193	0.937819				145.869	219	1.73186	143.754	198	1.21272	153.23	198	1.76514	133.098	160	0.884598	126.295	162	1.04085	129.869	153	0.975875				130.049	173	0.992877			122.049	152	0.630182
154.803	197	0.931075				145.885	188	1.17986	132.443	167	1.42118	152.246	192	1.72571	133.541	172	0.839598	126.148	166	1.23329	125.82	154	0.983631				139.311	169	1.29343			122.066	152	0.63041
135.557	167	0.81552				145.934	194	0.726366	132.246	174	1.27605	138.951	175	0.974149	145.918	191	1.3201	150.082	200	2.53977	124.164	159	0.96552				139.508	174	1.53461			122.066	152	0.631176
134.443	170	0.809693				146	192	0.950703	132.885	173	0.983685	175.197	219	1.97494	137.148	176	1.03819	150.787	194	1.55892	145.049	191	1.41093				130.164	204	0.835592			122.066	152	0.631477
140.787	162	1.02635				146.049	202	1.17683	143.623	180	1.65613	173.426	274	1.77041	122.738	145	0.666523	140.475	185	0.979288	145.279	196	1.47725				125.721	164	0.977996			122.066	152	0.632252
135.885	165	0.920639				146.148	216	1.03881	128.82	176	1.01664	150.344	192	1.36483	133.098	182	0.830165	137.836	187	1.20765	131.934	165	1.24491				139.852	191	1.34294			122.066	152	0.632627
131.82	166	0.758433				146.23	202	0.909301	130.672	165	1.10862	165.607	201	2.13452	137.459	167	0.9003	136.393	163	0.943324	125.869	153	0.92523				133.492	170	1.1939			122.082	152	0.63279
138.066	185	0.774433				146.246	178	1.19701	133.18	172	1.00674	147.328	195	1.19083	156.295	225	1.39777	142.361	186	1.18259	162.066	203	1.73684				134.967	173	0.728376			122.098	152	0.633021
147.902	184	0.943789				146.393	194	1.02511	145.787	209	1.58591	178.443	248	1.74024	131.082	162	0.807388	137.738	165	1.11945	127.475	163	0.816904				145.426	193	1.50883			122.098	152	0.633039
157.77	211	1.04622				146.41	185	0.846716	123.508	166	0.59707	170.377	230	1.52691	140.656	187	0.83254	150.951	192	1.51231	121.033	160	0.635158				139.279	186	0.817668			122.115	152	0.633173
146	190	1.17668				146.426	177	0.956215	131.246	166	0.945626	156.41	191	1.75038	138.115	171	0.956495	140.639	185	1.1913	131.361	164	1.22135				143.951	192	1.18129			122.148	152	0.633477
155.311	191	1.09057				146.492	185	1.03887	131.656	164	0.77105	142.721	187	0.875154	131.689	161	0.661611	145.541	179	1.28943	123.115	155	0.737841				150.459	220	1.16901			122.148	152	0.633746
137.836	174	0.659345				146.492	205	1.32073	132.262	158	0.537956	161.311	217	1.55116	132.033	162	0.60638				122.279	149	0.957001				128.787	161	1.05176			122.18	152	0.633831
137.082	170	0.807062				146.525	182	0.970924	140.525	176	0.889291	134.344	177	0.911548	130.525	171	0.917009				129.82	150	1.25385				131.705	167	1.12051			122.213	152	0.634197
144.443	180	0.790665				146.574	183	1.30885	135.754	176	1.1133	183.967	269	1.65403	140.852	180	1.28226				145.164	186	1.45992				153.934	213	1.78743			122.23	152	0.634398
151.918	180	1.22609				146.59	192	0.714566	159.721	218	1.51436	157.23	196	1.66735	134.098	187	1.03645				125.033	151	0.946347				146.246	193	1.56061			122.23	152	0.63443
141.41	180	0.732504				146.623	206	0.643066	160.77	233	1.5143	160.705	239	1.31559	140.049	188	0.697593				143.623	185	1.24912				126.393	161	0.763871			122.279	152	0.634742
150.656	185	0.890418				146.656	186	1.51593	143.41	169	1.75804	149	205	1.23235	148.721	184	1.29077				135.689	180	1.34215				141.344	172	1.12223			122.279	153	0.634974
150.262	202	0.578982				146.705	192	1.22012	136.311	165	1.29478	138.148	162	1.35543	127.738	157	0.604856				141.213	183	1.13343				143.115	178	1.16183			122.279	153	0.635158
133.131	168	0.773605				146.754	185	1.31674	147.033	200	1.45988	144.705	175	1.07071	132	166	0.869638				129	157	1.07472				144.443	193	1.41853			122.295	153	0.635716
150.787	189	1.06963				146.836	181	0.795922	129.721	176	0.657344	140.574	177	1.02467	132.164	168	0.750447				133.869	188	0.702432				150.049	190	1.80099			122.311	153	0.636436
137.82	168	0.633477				146.836	192	1.26868	174.967	242	1.7285	147.836	200	1.64695	145.459	176	1.33417				127.738	154	0.936866				147.426	197	1.30203			122.328	153	0.63659
140.459	175	0.730763				146.951	189	0.927435	131.607	159	0.774439	164.705	234	1.48651	133.082	168	0.603499				144.984	199	1.473				151.82	208	1.72042			122.328	153	0.637134
143.344	177	1.16396				146.951	184	1.12333	136.967	175	1.16947	180.951	292	1.73082	129.754	163	0.691376				139.721	185	1.37325				141.672	198	1.05235			122.361	153	0.63724
142.77	186	0.639876				147.049	175	1.13443	128.475	161	0.892141	171.213	260	1.61864	134.852	173	0.708024				123.787	156	0.729632				148.295	183	1.08252			122.377	153	0.637613
133.836	185	1.33647				147.049	185	1.04161	147.033	200	1.54988	142.377	170	1.1988	134.672	171	0.739954				128.082	173	0.70353				145.803	193	1.38752			122.377	153	0.637742
126.803	159	1.29081				147.148	179	0.791503	146.541	186	1.67578	136.475	172	0.806649	148.033	206	1.01268				146.115	184	1.41957				144.066	187	1.5359			122.393	153	0.63782
131.148	166	1.37672				147.164	180	1.1758	131.492	164	0.928453	139.443	176	0.889365	141.623	178	0.589488				127	165	1.06943				133.869	162	1.42936			122.393	153	0.637846
136.311	172	1.56303				147.23	182	1.14588	130.23	152	1.33191	131.164	163	0.883944	130.148	186	0.597712				128.918	163	1.05281				125.902	162	0.914605			122.41	153	0.638157
136.623	166	1.57979				147.262	190	0.905176	126.41	151	0.737508	172.934	265	1.75205	132.672	180	0.31961				140.984	176	1.49063				154.492	218	1.74696			122.41	153	0.638404
118.475	145	0.84112				147.311	190	0.870945	133.689	167	1.46085	155.361	215	1.67293	137.328	171	1.00739				121.213	150	0.74894				142.377	193	1.35201			122.426	153	0.638828
127.754	166	1.19404				147.443	189	1.06797	132.41	177	1.32805	152.361	197	1.3582	129.246	157	0.571921				137.246	172	1.29334				162.803	214	2.0384			122.443	153	0.639051
						147.459	188	0.870325	132.279	167	1.28743	140.672	188	0.809026	128.689	158	0.844962				141.607	181	1.69392				144.82	193	1.52819			122.443	153	0.639519
						147.508	189	1.1834	139.295	178	1.65934	141.541	162	1.50289	136.705	156	0.871943				134.738	180	1.27663				127.049	160	0.829306			122.459	153	0.639563
						147.525	186	1.14487	126.885	166	0.817277	144.918	193	1.21135	129.426	151	0.733312				137.541	182	1.21903				132.639	174	1.29323			122.459	153	0.639607
						147.541	188	1.51616	122.738	146	0.958029	157.049	195	1.44625	131.279	163	0.926949				128.803	152	1.09521				142.033	190	1.11695			122.475	153	0.639676
						147.541	206	1.13021	142.639	175	1.1687	175.131	262	1.50784	139.23	182	1.01446				127.885	158	0.885605				136.902	179	1.20774			122.475	153	0.63974
						147.574	193	0.938234	115.82	145	0.696836	147.656	182	1.28714	138.77	175	0.790529				151.18	191	1.68756				146.59	203	1.46666			122.508	153	0.639876
						147.623	200	1.23575	116.262	148	0.838696	184.492	262	1.77286	144.131	181	1.16037				122.59	157	0.811521				139.869	190	1.27367			122.508	153	0.639911
						147.656	187	1.65955	118.557	143	1.00007	142.131	180	1.12854	136.934	166	1.69668				123.475	164	0.980792				181.754	241	1.62985			122.525	153	0.640406
						147.705	192	1.2621	122.295	156	0.946997	170.787	226	1.76923	131.18	163	0.66146				138.803	178	1.34701				140.246	179	1.4868			122.541	153	0.640948
						147.721	188	1.45561	131.934	177	1.11948	137.656	189	1.00669	134.131	163	0.581821				137.607	174	1.39785				130.377	164	0.798139			122.557	153	0.641118
						147.721	191	1.12162	124.787	150	1.20032	148.098	217	0.916159	139.705	173	1.23656				141.721	171	1.39657				127.639	164	0.876978			122.59	153	0.642066
						147.754	195	1.68948	128.377	165	1.07747	211.426	373	1.6725	134.77	172	0.92706				136.787	181	1.13928				136.131	181	1.30829			122.59	153	0.642293
						147.82	186	1.28903	120.033	154	1.06588	132.213	162	0.816542	124.918	152	0.749491				129.262	157	1.16121				140.18	185	1.18792			122.59	153	0.642305
						147.836	200	1.54023	117.705	157	0.885191	149.738	205	1.06441	135.393	186	0.965811				128.016	168	0.702514				150	207	2.08278			122.59	153	0.642594
						148.016	176	1.22299	119.77	151	0.986302	163.623	250	1.77452	131.41	177	0.573558				149.869	198	1.60079				141.574	175	1.44586			122.623	153	0.642652
						148.082	220	0.926431	115.426	140	1.1791	132.77	166	1.27271	120.934	165	0.684664				143.902	182	1.64329				146.508	203	1.36037			122.639	153	0.64293
						148.148	204	0.932431	118.885	144	1.05546	149.279	204	1.39315	128.705	160	0.79969				149.705	198	2.06977				132.607	162	0.964438			122.639	153	0.643066
						148.148	193	1.14165	118.41	154	0.991448	140.623	178	1.15256	129.902	166	0.635716				141.82	190	1.40059				142.328	196	1.22698			122.639	153	0.643236
						148.18	194	1.05429	121.492	153	1.0385	160.459	216	1.6184	125.377	150	0.937546				126.164	158	1.29028				148.951	190	1.88368			122.639	153	0.643346
						148.344	182	1.34533	121.557	141	1.02431	139.918	177	1.26245	123.459	154	0.895853				131.984	170	0.958199				148.246	198	1.71018			122.672	153	0.643512
						148.41	191	0.818062	116.344	156	0.787133	127.852	159	0.818753	153.574	202	1.74775				127.869	175	0.779314				130.311	171	1.10044			122.672	153	0.643639
						148.426	202	1.67425	128.557	165	1.27496	137.656	164	1.26358	135.984	164	0.594515				153.213	200	1.81522				136.279	164	0.918003			122.689	153	0.643841
						148.426	186	1.64981	132.311	183	0.947313	139.721	192	1.21271	143.639	185	0.920906				131.82	158	0.687326				131.41	167	1.13287			122.689	153	0.643933
						148.508	193	1.47823	129.131	171	0.884774	146.426	185	1.711	132.803	171	0.57899				136.738	174	1.11918				149.705	188	1.68209			122.721	153	0.64419
						148.508	185	1.40744	133.721	177	1.34812	140.59	176	1.48986	119	151	0.477962				142.148	189	1.34204				142.803	186	0.98487			122.721	153	0.644604
						148.623	184	1.20974	122.066	152	1.06296	145.213	182	1.72397	136.393	180	0.844633				134.508	173	1.25969				137.197	183	0.889977			122.721	153	0.644671
						148.672	193	1.08925	127.967	162	1.27771	136.328	167	0.940861	141.984	185	0.794701				131.721	164	1.24971				138.557	169	1.02005			122.721	153	0.64475
						148.82	206	1.20105	139.049	174	1.5611	129.787	169	0.988591	145.279	195	0.990637				139.541	180	1.18172				124.623	170	0.797163			122.738	153	0.645267
						149	195	1.62313	133.213	180	1.08566	130.656	164	1.00854	154.328	197	1.94296				137.934	168	1.43064				128.131	159	0.846605			122.738	153	0.645722
						149.049	185	1.24496	121.803	147	1.27616	137.197	174	1.0998	128.279	177	0.532897				123.016	148	0.737087				145.656	188	1.66206			122.738	153	0.645806
						149.098	242	0.516916	133.311	173	1.15941	133.902	174	1.03023	149.082	207	1.31216				138.475	185	1.03339				135.426	168	1.16643			122.77	153	0.646155
						149.115	185	1.65012	135.77	168	1.46285	131.885	160	0.962415	136.475	169	1.06017				125.361	157	0.834031				136.328	166	1.03637			122.82	153	0.646528
						149.131	177	0.839941	128.197	174	1.01511	138.557	186	1.16554	140.738	176	1.24388				145.607	196	1.33399				142.115	187	1.24659			122.836	153	0.646951
						149.131	196	0.670105	131.918	160	1.23427	166.098	240	1.64215	126.738	163	0.867716				124.541	150	1.07552				160.295	201	1.83151			122.852	153	0.647484
						149.131	197	1.21485	127.279	154	1.2292	149.393	190	0.829645	151.721	191	1.95089				124.77	159	0.837996				147.23	188	1.99769			122.869	153	0.647588
						149.164	188	0.908516	134.492	174	1.28503	159.41	200	1.60881	119.328	152	0.409558				141.23	176	1.50858				138.77	180	1.32659			122.885	153	0.648121
						149.262	181	1.12575	134.885	179	1.32117	138.607	171	1.00714	138.984	173	1.38006				121.787	151	0.660202				137.869	176	1.41932			122.885	153	0.648233
						149.279	196	1.10518	135.541	163	1.21088	188.279	247	1.77544	133.344	188	0.832842				126.115	155	0.93211				141.164	179	0.822111			122.885	153	0.648304
						149.311	205	1.48349	129.672	156	1.29033	138.311	174	1.39484	135.016	171	0.863587				153.295	199	1.64201				138.213	178	1.25106			122.902	153	0.649669
						149.311	196	0.946758	138.525	183	1.4432	154.721	199	0.773321	128.59	157	0.693895				135.475	180	1.09291				132.869	167	1.12403			122.902	153	0.649779
						149.41	199	0.81514	127.328	158	1.07038	155.82	204	1.50182	128.131	155	0.708111				131	160	0.955971				136.77	170	1.3568			122.934	153	0.650648
						149.426	193	1.02244	128.459	165	1.39199	160.311	199	1.41151	127.328	158	0.83891				129.344	171	0.841297				127.131	161	1.15391			122.934	153	0.650987
						149.443	192	1.29569	132.115	166	1.05424	148.803	189	1.15461	145.869	190	1.48739				127.066	153	0.890788				128.934	158	1.37606			122.951	153	0.651085
						149.443	187	0.953208	118.967	145	0.780664	137.803	173	1.33638	127.656	155	0.871517				132.672	165	1.27609				155.459	194	1.69811			122.951	153	0.651375
						149.459	193	1.20284	124.656	171	0.831528	147.852	202	1.00659	122.033	150	0.495174				140.639	173	1.32087				161.754	212	1.96627			122.967	153	0.651567
						149.492	192	1.21649	129.902	164	1.29278	139.098	175	0.782649	130.459	158	1.14228				124.918	163	0.924374				139.41	182	1.26711			122.984	153	0.652273
						149.541	181	1.94289	124.23	155	1.129	164.59	245	1.30044	144.197	178	0.998385				127.852	161	0.93098				144.574	197	1.54484			122.984	153	0.652331
						149.557	203	1.36551	140.344	172	1.79211	141.18	184	1.00306	132.967	165	0.893057				140.885	214	1.37365				138.672	185	1.47715			122.984	154	0.652389
						149.607	197	1.21526	125.607	156	1.18422	154.705	191	1.32474	139.377	166	1.21973				129.77	165	1.116				123.148	161	0.71681			123	154	0.653281
						149.803	207	0.937517	125.328	157	1.30639	156.016	196	1.13648	136.689	159	0.944538				139.311	198	1.29091				144.279	200	0.996589			123.016	154	0.653509
						149.869	200	1.05076	119.951	155	0.684654	184.721	232	1.71848	138.803	185	1.36693				145.984	189	1.65002				146.639	202	1.55648			123.016	154	0.653724
						149.885	196	0.781615	120.754	152	0.99872	167.213	246	0.980464	130.803	172	0.971435				140.262	176	1.10713				130.23	164	1.16366			123.016	154	0.653932
						149.902	192	0.964036	128.213	164	1.23649	152.475	191	1.24349	137.754	171	1.00254				136.852	167	1.54836				160.639	209	1.72229			123.033	154	0.654235
						149.918	189	1.23251	131.049	152	1.46439	143.082	191	0.800941	134	178	0.92191				124.836	157	0.850304				150.18	187	1.73055			123.066	154	0.654329
						150.016	203	1.15405	126.361	153	1.31574	151.098	185	1.14732	118.295	146	0.642066				131.443	167	0.957983				134.951	172	0.967788			123.066	154	0.65495
						150.115	205	1.18972	137.656	175	1.31168	147.787	192	1.01601	128.607	149	1.04242				137.459	174	1.41117				135.508	172	0.805093			123.066	154	0.656251
						150.131	201	1.01635	122.721	147	1.24666	158.459	249	0.911251	119.426	156	0.486073				152.197	202	1.67164				128.393	170	0.739884			123.082	154	0.656286
						150.279	188	0.967154	119.885	145	0.98551	150.344	190	1.11279	127.967	159	1.04919				133.426	173	1.28986				128.705	164	1.00801			123.082	154	0.656591
						150.344	182	0.943267	125.967	156	1.42762	172.016	222	1.67426	124.033	149	0.821728				144.295	186	1.76835				142.689	190	1.542			123.082	154	0.6568
						150.393	215	1.51482	116.951	147	0.753299	160.639	218	1.47527	152.984	213	1.63492				137.623	171	0.82488				142.508	194	0.790752			123.082	154	0.657114
						150.443	186	1.31016	142.262	184	1.73913	161.115	221	1.01492	134.459	170	0.617194				129.623	157	1.12283				140.525	193	1.34615			123.082	154	0.657154
						150.443	198	0.97457	115.836	138	0.683587	181.541	273	1.6334	130.361	163	0.639911				142.557	193	1.49001				139.213	170	1.06739			123.082	154	0.657344
						150.623	198	1.19626	122.82	164	0.910171	189.377	271	1.56481	129.525	159	0.961377				131.541	166	0.894906				133.607	168	1.09014			123.098	154	0.657429
						150.721	196	1.32222	118.738	162	0.675993	140.77	171	0.98171	131.148	164	0.794616				128.131	155	0.881208				139.918	172	1.54026			123.115	154	0.658338
						150.738	191	0.999574	151.246	198	1.55756	171.426	212	1.25043	128.934	160	0.393917				142.246	179	0.857514				137.754	172	1.29169			123.115	154	0.658552
						150.77	201	0.902755	128	165	0.84745	191.869	254	1.70891	132.754	167	0.650648				142.328	175	1.19857				138.328	178	1.50291			123.115	154	0.658819
						150.803	195	0.929441	147.443	198	1.29497	138.803	185	0.956162	138.066	184	0.809664				129.197	163	0.977576				126.098	159	0.744625			123.115	154	0.659345
						150.82	185	1.22319	147.41	190	1.4782	146	210	1.33629	132.41	171	0.716145				125.148	157	0.60803				138.164	175	1.55059			123.131	154	0.659669
						150.836	205	1.15738	153.656	204	1.45484	149.033	191	1.42741	123.705	147	0.620449				134.934	180	0.858169				127.377	155	0.800442			123.131	154	0.660161
						150.934	181	1.40379	134.262	180	1.19937	140.721	173	1.50979	125.738	156	0.643933				130.475	163	0.742127				129.459	159	1.14348			123.131	154	0.660202
						150.951	196	1.64727	130.131	163	0.892363	146.475	210	1.40494	131.377	180	1.08739				140.098	179	1.11037				127.377	164	0.533601			123.148	154	0.660225
						151.016	192	0.820849	146.574	196	1.21723	143.492	178	1.08383	125.951	162	0.731943				126.197	157	0.796172				148	196	1.57894			123.148	154	0.660409
						151.033	186	1.23741	131.852	161	1.21775	137.246	170	1.08898	132.279	167	0.27535				139.705	170	1.30111				127.377	156	0.960585			123.148	154	0.66047
						151.049	204	1.05213	135.426	183	0.877597	135.59	172	1.15936	134.574	165	0.980019				147.115	190	1.7012				128.984	169	0.923046			123.164	154	0.660528
						151.066	197	1.4873	144.984	179	1.3933	136.311	179	1.10695	170.311	216	1.27925				125.508	155	1.05124				129.934	164	0.972838			123.18	154	0.660598
						151.066	201	1.03564	130.082	167	0.686012	146.918	215	1.35546	136.852	162	0.640406				143.279	185	1.58578				129.41	182	0.753415			123.197	154	0.660889
						151.098	217	1.48225	134.574	179	1.95493	145.115	178	1.10563	135.262	177	0.815825				125.41	155	0.902999				136.787	186	0.922775			123.213	154	0.661329
						151.115	191	1.12819	131.066	165	0.584068	171.738	222	1.25029	140.393	179	1.23093				133.885	174	1.09569				143	205	1.15812			123.23	154	0.661363
						151.213	207	1.64245	144.557	184	1.50682	148.705	190	0.996511	139.426	179	0.644604				142.066	181	1.25729				130.426	161	1.26938			123.246	154	0.66146
						151.262	195	1.14144	140.426	183	1.46826	157.672	202	0.940315	121.754	142	0.786668				131.967	163	1.00628				134.705	167	1.06952			123.246	154	0.661611
						151.328	202	0.817517	128.311	167	0.64293	147.508	197	1.04664	136.262	175	0.586584				128.213	175	0.823896				140.787	183	1.45626			123.246	154	0.661741
						151.361	204	1.44593	143.131	182	1.50922	173.426	223	1.64601	124.344	166	0.910842				139.738	168	1.78057				165.361	228	1.64649			123.262	154	0.662005
						151.41	196	1.08895	129.115	159	0.891882	149.525	200	1.02211	133.131	159	0.852656				136.197	169	1.38305				152.574	196	1.72043			123.295	154	0.66207
						151.443	193	0.928075	127.984	157	0.853673	157.934	200	1.13275	135.197	160	0.605741				130.098	162	1.01677				131.574	161	0.943988			123.311	154	0.662614
						151.475	199	1.19684	126.393	155	0.921955	186.836	242	1.67769	138.459	173	0.564906				130.344	153	1.0869				135.738	177	1.00132			123.328	154	0.663057
						151.475	191	0.95826	130.525	158	1.03126	155.148	207	1.04603	115.754	142	0.602037				132.082	164	0.756228				144.377	181	1.14328			123.344	154	0.663213
						151.475	188	1.14869	141.836	209	1.28292	153.951	211	1.08144	111.689	130	0.372771				138.393	182	1.48563				130.82	162	0.870927			123.361	154	0.66395
						151.541	184	1.041	143.656	188	1.27583	164.59	206	1.53091	121.41	150	1.18997				139.328	188	1.63066				130.951	169	0.913204			123.377	154	0.664875
						151.541	226	1.31091	136.934	166	1.40575	149.016	181	0.707011	118.541	138	0.71497				146.672	190	1.26183				130.262	168	0.887914			123.393	154	0.665194
						151.639	199	0.90393	136.738	183	1.0541	156.164	197	1.10417	132.131	166	0.571951				126.885	156	0.851791				131.984	170	0.875493			123.393	154	0.665333
						151.656	194	0.807746	128.262	158	0.738765	152.131	185	0.933811	137	189	0.86834				138.705	174	1.47385				133.131	167	0.981613			123.393	154	0.665416
						151.689	184	1.16601	123.164	155	0.956683	166.492	230	1.49075	136.18	166	0.384948				135.918	181	1.41819				148.197	188	1.74193			123.41	154	0.666071
						151.705	181	0.986248	142.279	186	1.42529	158.607	206	1.52599	127.361	157	1.01205				125.295	156	0.883606				143.951	182	1.09056			123.426	154	0.666523
						151.705	187	1.24032	126.541	150	0.933675	159.377	197	1.1352	114.279	136	0.704661				123.361	153	1.11032				144.967	206	1.69182			123.426	154	0.666758
						151.721	195	0.788057	131.361	184	1.12889	142.148	187	0.525675	136.279	167	0.627905				140.016	168	1.53556				156.016	200	1.81843			123.426	154	0.666909
						151.738	184	0.758125	128.508	162	1.04436	151.033	188	1.41148	137.689	173	0.805243				119.934	157	0.903807				139.246	175	1.4206			123.459	154	0.667608
						151.803	190	0.679826	128.656	159	0.924886	178.689	217	1.47011	143.508	179	0.974301				134.279	171	1.36155				137.361	180	1.24207			123.475	154	0.668031
						151.852	202	0.965482	123.541	162	0.945841	149.59	199	1.31014	140.197	173	0.621551				118.426	153	0.599756				129.885	163	1.12507			123.475	154	0.668083
						151.967	190	1.39905	138.279	183	1.35852	141.459	181	1.15294	139.328	175	0.616957				125.148	154	1.34737				120.836	152	0.862554			123.492	154	0.668192
						151.984	206	1.63864	122.639	148	0.70342	144.426	195	1.12589	137.148	168	0.202301				126.787	157	0.93419				134.59	159	1.53303			123.492	154	0.668236
						152.082	184	1.4752	150.672	204	1.4497	149.164	185	1.3247	142.098	204	1.02135				129.098	158	0.927142				129.443	182	0.913106			123.492	154	0.668769
						152.197	190	1.3986	133.459	167	1.17663	136.557	164	1.14843	134.213	169	0.339049				130.459	182	0.980844				138.082	178	1.37613			123.508	154	0.669815
						152.295	195	1.16108	164.803	211	1.83912	141.459	201	0.743307	138.934	185	0.516647				139.967	193	1.35131				126.311	166	0.812751			123.508	154	0.670009
						152.311	194	0.806717	135.082	177	0.98771	170.705	207	1.54556	138.23	191	0.436407				123.541	154	0.827737				139.23	184	1.44373			123.525	154	0.670105
						152.311	209	1.24018	127.279	163	0.693146	173.311	238	1.76154	123.656	148	0.87318				133.23	159	1.22259				147.016	182	1.35566			123.525	154	0.670198
						152.311	189	1.2866	124.984	166	0.707376	140.016	194	0.868884	134.344	175	1.27961				119.049	141	0.786586				149.689	229	1.20736			123.541	154	0.670303
						152.361	190	0.919379	136.311	176	0.888174	145.574	184	1.22619	139.443	195	0.505528				136.984	176	1.34761				160.18	206	1.76096			123.541	154	0.670313
						152.361	192	1.2075	135.246	173	1.28021	149.869	190	1.13142	140.967	172	0.765034				144.492	187	1.57765				132.377	180	1.17747			123.541	154	0.670464
						152.41	199	1.45017	134.016	177	1.24493	137.689	167	0.897408	146.393	195	0.579488				128.377	164	1.03617				138.656	178	1.24186			123.557	154	0.670465
						152.426	204	1.48347	128	155	0.821386	145.148	179	0.953565	133.344	170	0.342355				124.689	162	1.13822				127.984	153	1.0629			123.574	155	0.670649
						152.443	212	1.11204	143.475	194	1.33293	146.049	180	1.23883	130.885	161	0.601536				131.459	168	1.45902				139.18	184	1.21865			123.59	155	0.67113
						152.443	247	1.08087	136.508	165	0.982354	138.049	183	0.779046	144.967	194	0.598586				119.246	153	0.847194				130.492	162	1.10287			123.607	155	0.671153
						152.492	208	0.790573	139.262	179	1.33043	174.656	246	1.38345	127.77	169	0.823344				144.41	182	1.65803				136.705	169	1.15834			123.607	155	0.672736
						152.607	190	0.918421	142.59	218	1.30702	164.754	208	1.4442	138.361	175	0.481283				154.59	221	1.58251				136.361	170	1.22741			123.607	155	0.672883
						152.639	211	0.972331	132.574	165	1.1616	154.197	194	1.13373	139.148	197	0.87694				120.787	147	1.22734				155.492	220	1.54805			123.607	155	0.673334
						152.689	194	1.30529	124.705	176	0.708501	151.836	184	1.44443	137.344	181	0.598067				125.098	153	1.11305				137.377	169	1.21764			123.639	155	0.673708
						152.705	223	1.4002	136.311	185	1.12216	199.311	251	1.79536	141.262	178	0.599879				124.295	166	0.893577				145.705	192	1.39848			123.639	155	0.67375
						152.721	195	1.5394	169.984	246	1.82697	141.639	173	1.15075	117.508	150	0.521561				128.557	164	1.5161				147.23	186	1.89682			123.639	155	0.673933
						152.721	209	1.62194	125.098	159	0.572714	149.59	193	1.31325	135.672	161	0.432618				131.18	210	0.982825				198.836	325	1.86221			123.656	155	0.674243
						152.738	187	1.41534	164.033	212	1.81075	159.262	230	1.5562	125.656	151	0.567145				118.738	139	0.86819				141.18	177	1.22165			123.656	155	0.674394
						152.77	204	1.24218	129.082	177	1.31751	182.23	228	2.00466	156.115	215	1.13528				133.23	165	1.05657				150.967	199	1.09894			123.672	155	0.674456
						152.869	182	1.54637	149.836	197	1.44177	141.426	181	1.05693	119.967	152	0.587409				129.574	162	1.0972				132.246	167	0.812067			123.689	155	0.674616
						152.967	197	1.22939	128.705	153	1.23045	151.918	186	1.19363	108.098	150	0.445321				131.393	171	1.10666				147.787	191	0.832596			123.705	155	0.675715
						152.984	197	1.21832	140	195	1.29304	149.148	184	0.890566	141.197	182	0.46774				137.918	181	1.10616				145.984	204	1.1541			123.721	155	0.675993
						153.033	194	1.10704	137.656	175	1.48359	149.049	178	1.60714	153.197	197	0.820146				140.967	195	1.19632				150.115	229	1.24268			123.738	155	0.676017
						153.049	195	1.18147	140.869	168	1.25819	143.197	179	1.17274	142.18	178	0.618526				123.18	173	0.702497				138.508	178	1.37967			123.738	155	0.676092
						153.098	209	1.35539	125.393	175	0.856678	161.656	198	1.0225	140.557	177	0.494829				147.967	198	1.31214				160.607	214	1.76336			123.754	155	0.676504
						153.098	212	0.821675	127.311	169	0.772721	158.197	209	0.540423	137.049	169	0.45571				141.508	190	1.34745				144.082	206	1.01251			123.787	155	0.67652
						153.131	193	0.976259	137.443	173	1.09636	176.885	219	1.22657	138.918	184	0.338663				144.705	190	1.27087				168.705	236	1.74942			123.803	155	0.676715
						153.148	203	1.35371	136.689	170	1.10457	159.311	195	1.32564	144.279	183	0.550772				151.262	192	1.5712				146.738	202	1.1472			123.803	155	0.676943
						153.262	194	1.10895	126.623	162	0.780716	161.885	201	0.951657	138.918	181	0.350868				171.902	226	1.79909				158.115	210	1.94339			123.82	155	0.677091
						153.344	195	1.43635	128.557	171	0.714617	179.213	217	1.30899	138.098	167	0.591491				134.902	199	1.37321				128.311	168	0.84221			123.82	155	0.678247
						153.361	194	0.856065	131.869	169	0.904325	152.361	196	0.859061	144.033	183	0.79825				135.656	170	1.3074				134	163	1.16157			123.836	155	0.678443
						153.377	189	1.01896	125.557	162	0.838995	180.787	241	1.64954	133.984	160	0.587252				116.672	156	0.445925				141.115	179	1.43018			123.836	155	0.679076
						153.426	227	1.37036	135.705	181	1.15756	155.262	191	0.751102	147.361	176	0.671153				118.852	144	0.880335				141.131	170	1.04748			123.836	155	0.679826
						153.639	205	1.54478	137.803	189	0.9901	145.934	179	0.648304	140.393	187	0.332117				134.82	186	1.49908				130.574	157	0.790163			123.836	155	0.679922
						153.689	190	1.31374	129.607	156	1.03887	161.131	211	1.17523	143.738	177	0.49191				145.443	179	1.89182				172.066	256	1.79874			123.852	155	0.679956
						153.738	191	0.831633	130.639	166	0.845127	170.607	207	1.28595	136.639	169	0.260961				126.967	164	0.943664				140.59	184	0.825948			123.852	155	0.680766
						153.77	190	0.891917	137.475	168	1.24645	158.492	187	1.68139	143.311	183	0.626044				120.033	150	0.776058				148.197	201	1.47752			123.885	155	0.680948
						153.77	197	1.32356	131.754	160	0.854062	171.016	201	1.17622	128.098	167	0.77794				128.508	163	0.951881				162.869	228	1.51025			123.902	155	0.680977
						153.787	199	0.948686	150.672	204	1.28952	172.82	207	1.41245	144.197	179	0.530347				162.656	207	2.21638				143.852	215	0.459792			123.918	155	0.681462
						153.885	201	0.977052	148.574	197	1.46237	147.705	180	0.844499	140.41	168	0.483263				133.492	173	0.91523				150.557	217	1.13418			123.918	155	0.681937
						153.902	202	0.808992	146.787	186	1.75064	159.607	207	0.747541	137.852	175	0.639519				127.689	160	1.07283				133.984	174	1.13782			123.918	155	0.68226
						154	196	1.59073	135.197	168	1.07727	153.164	188	0.947539	138.77	181	1.40771				136.672	177	1.31213				148.393	202	1.29801			123.918	155	0.682278
						154.033	208	0.996523	127.197	152	1.02616	176.164	225	1.53217	115.459	135	0.674394				147.066	186	1.54943				172.328	232	1.83251			123.934	155	0.68229
						154.049	196	1.25907	130.508	174	0.520219	151.672	195	0.741358	119.803	163	0.54066				124.59	152	1.05044				152.705	208	1.73242			123.934	155	0.682392
						154.098	191	1.35003	139.246	211	1.02685	162.721	210	1.2605	132.557	173	0.280895				125.639	161	1.04608				132.623	168	1.15086			123.934	155	0.682535
						154.197	191	1.87323	121.574	151	0.742136	155.246	192	0.986144	141.459	179	1.42783				122.328	149	0.67652				147.852	185	1.33763			123.934	155	0.682966
						154.213	190	1.26472	130	161	0.88694	156.311	195	1.10991	124.377	168	0.398604				146.59	204	1.36308				139	172	1.21912			123.934	155	0.683564
						154.213	189	1.29997	144.459	170	1.44347	151.508	184	0.688505	113.885	145	0.877681				155.377	194	1.63296				157.803	202	1.51331			123.951	155	0.683587
						154.246	202	1.29503	140.508	173	1.56519	188.754	257	1.66627	136.951	169	0.625114				142.967	189	1.39727				168.098	234	1.58316			123.951	155	0.684239
						154.279	185	1.33892	150.574	199	1.66649	141.262	175	0.900376	125.131	171	0.637742				121.803	147	1.019				150.344	195	1.63306			123.951	155	0.684439
						154.328	193	1.26873	143.672	189	1.25741	158.41	209	0.792388	137.262	166	0.427076				144.328	206	1.40091				129.311	160	0.638157			123.951	155	0.684654
						154.361	200	0.955703	151.475	209	1.3607	141.344	184	1.02244	144.902	172	0.764267				127.689	154	0.786387				153.492	202	1.61762			123.967	155	0.684664
						154.361	191	1.18187	132.574	163	0.623378	150.869	196	0.934002	138.246	174	0.502951				154.213	202	1.76927				148.541	213	1.25307			124	155	0.68506
						154.557	190	0.82287	125.246	163	0.669815	156.443	198	1.07847	132.869	165	0.965655				137.639	168	1.13455				149.951	197	1.0376			124	155	0.685529
						154.574	191	1.01739	134.066	166	1.23377	159.164	197	0.740441	138.262	196	0.323604				124.492	155	0.940499				160.262	219	1.54388			124	155	0.68564
						154.639	191	1.76377	127.311	159	0.885368	159.721	192	1.54441	138.918	170	0.386164				146.131	185	1.38437				148.033	192	1.47328			124	155	0.685687
						154.672	195	0.777792	128.918	167	0.915207	161.443	194	1.39715	144.918	187	1.1171				125.262	155	1.04066				155.066	215	1.42761			124.016	155	0.686012
						154.721	193	1.50083	128.033	157	0.900897	158.836	217	1.34369	124.721	165	1.00669				127.328	157	0.99966				143.148	184	1.72739			124.016	155	0.686156
						154.754	188	1.38824	155.016	213	1.58872	154.852	194	0.673933	133.541	156	0.539022				137.18	190	1.24733				148.656	184	1.47628			124.033	155	0.686176
						154.803	212	0.918746	153.066	197	1.61052	146.525	181	0.729461	152.475	210	1.64933				173.508	238	1.89877				141.18	187	1.16392			124.033	155	0.687303
						154.918	213	0.92398	123.754	164	0.863432	152.164	187	0.830309	125.393	168	0.739993				122.902	153	1.13325				129.049	164	0.786647			124.082	155	0.687326
						154.951	206	1.73096	130.984	167	1.25275	148.623	200	0.905237	132.885	160	0.579581				142.77	171	0.779095				125.279	155	0.911487			124.082	155	0.687495
						155.262	198	1.37327	133.115	179	0.953969	148.082	183	1.41826	139.295	179	0.538735				144.443	194	1.29915				133.426	178	1.21669			124.098	155	0.68755
						155.361	191	1.10161	127.541	160	0.814113	152.639	185	0.723784	139.443	168	0.661741				122.213	150	0.969081				134.59	180	1.19649			124.098	155	0.687614
						155.393	220	1.05929	154.967	187	1.69082	141.656	179	1.04317	150.852	209	0.722043				148.148	186	1.75717				132.246	162	1.1718			124.131	155	0.687617
						155.41	232	1.53406	125.049	162	0.770177	186.508	249	1.97518	134.82	192	0.279971				122.984	159	0.866369				151.672	215	1.666			124.148	155	0.687917
						155.459	205	1.20467	121.475	150	0.632627	158.508	195	1.24779	145.344	187	0.452632				128.393	160	1.0674				134.377	175	0.906047			124.164	155	0.688037
						155.475	223	1.27023	125.705	159	0.593971	148.754	196	0.819643	125.754	150	0.806291				135.164	174	0.826531				132.721	175	1.1214			124.164	155	0.688505
						155.59	205	1.74718	126.639	154	0.908655	157.016	189	0.861401	135.59	169	0.509513				153.492	204	1.05679				144.443	186	1.22061			124.18	155	0.688853
						155.672	190	1.07064	122.23	153	0.726734	154.23	191	0.726878	136.082	166	0.455301				140.672	201	1.55055				144.066	187	1.11843			124.18	155	0.689042
						155.721	208	1.31855	125.803	156	0.855109	154.377	192	1.09427	116.541	145	0.981797				122.885	156	0.749437				136.049	171	1.22724			124.18	155	0.689334
						155.902	189	1.05601	122.443	163	0.983408	183.23	232	1.36785	153.41	198	0.615226				123.115	149	0.808361				137.557	189	1.05613			124.197	155	0.690002
						155.902	198	0.790043	122.738	148	0.909872	190.852	254	1.4096	137.852	162	0.668236				145.393	187	0.866725				132.098	174	0.96558			124.197	155	0.690398
						155.902	201	1.13384	124.738	158	0.780277	166.115	207	1.08051	118.361	149	0.772484				150.426	195	1.41698				133.934	169	1.04791			124.197	156	0.690499
						155.918	192	1.34622	144.623	195	1.43613	207.148	289	1.58093	138.705	163	0.343398				132.066	165	1.0886				146.475	191	1.49368			124.213	156	0.690509
						156.049	190	1.06985	125.295	159	1.03031	168.295	226	1.24701	138.59	163	0.567431				128.82	168	1.04374				147.082	195	1.37116			124.213	156	0.690893
						156.049	190	1.06985	124.41	148	1.00254	166.885	205	1.37621	135.246	162	0.34857				129.016	165	0.900639				139.82	183	1.28971			124.23	156	0.690934
						156.131	199	1.46472	131.197	175	1.11998	149.623	205	0.832183	135.885	167	1.45685				142.213	199	1.33563				138.918	175	1.08357			124.23	156	0.691376
						156.18	237	1.17743	143.918	186	1.62604	141.016	169	0.853764	134.459	168	0.50716				142.803	176	1.423				149.689	213	1.40416			124.23	156	0.691799
						156.197	196	0.721606	130.869	172	1.02265	150.902	192	1.22611	126.148	153	0.508146				131.23	164	1.04279				129.934	179	0.835256			124.262	156	0.692428
						156.23	219	1.03667	126.328	164	0.867792	146.098	177	0.908406	146.967	198	0.744409				125.098	153	0.893325				128.574	177	0.708412			124.262	156	0.692599
						156.23	201	1.1626	128.262	162	1.02236	166.016	205	1.1103	113.607	136	0.698				132.754	171	1.06298				136.311	192	1.358			124.279	156	0.692622
						156.246	216	1.39051	123.082	153	0.57403	177.377	231	1.40753	133.475	179	0.350232				127.639	157	1.13816				163.311	229	1.94078			124.279	156	0.692636
						156.279	198	1.50098	133.82	173	1.28097	141.738	175	0.728292	136.836	178	0.545036				130.902	167	1.3582				130.984	179	1.04968			124.295	156	0.693146
						156.311	214	1.39447	126.82	152	0.95258	143.393	176	0.718921	127.246	163	0.773215				135	173	1.25422				132.836	173	1.14961			124.295	156	0.693181
						156.328	220	1.0245	148.131	191	1.75764	151.148	198	1.19017	137.443	184	0.589446				120.016	166	0.730612				168.279	255	2.07446			124.295	156	0.693529
						156.344	209	1.26042	134.82	174	1.34767	148.951	205	0.79423	131.557	166	0.359669				124.77	162	0.84819				188.033	270	1.69655			124.295	156	0.693543
						156.344	199	1.36909	131.311	174	1.11445	155.443	191	1.02969	134.525	170	0.417327				148.639	198	1.37068				180.098	256	1.85473			124.295	156	0.693895
						156.41	213	1.5189	128.262	157	0.728314	150.459	195	0.965412	139.164	163	0.784715				149.098	207	1.70145				144.885	181	1.40409			124.311	156	0.69392
						156.41	201	0.784082	129.066	159	0.930113	153.803	208	1.31433	136.951	164	0.25178				120.885	148	0.682966				152.23	192	1.8129			124.328	156	0.693989
						156.541	206	0.875129	129.885	163	0.951918	144.902	186	0.905365	141.246	176	0.361292				132.869	166	1.08151				155.41	207	1.58748			124.344	156	0.694104
						156.59	208	1.13364	136.59	170	1.42796	148.377	194	0.896263	134.984	172	0.580401				125.689	179	0.887391				150.328	211	1.336			124.361	156	0.694768
						156.607	211	1.39873	125.443	159	1.03023	167.803	221	1.26006	134.77	161	0.486529				121.295	149	0.878927				133.803	166	0.994863			124.361	156	0.695569
						156.639	199	1.27284	137.984	169	1.42866	143.656	193	0.750127	143.787	180	0.453677				123.492	156	0.887038				150.672	205	1.32998			124.361	156	0.695959
						156.721	195	0.409997	143.689	197	1.49802	147.115	187	1.12996	128.754	164	0.942672				135.213	167	1.33684				131.639	179	1.0234			124.377	156	0.695979
						156.738	189	1.20376	139.246	209	1.25683	144.525	179	1.45755	130.574	159	0.519524				143.738	189	1.40486				138.869	197	1.29523			124.377	156	0.696836
						156.852	199	1.20451	133.557	167	1.1595	172.18	209	1.12146	147.525	182	0.527043				131.967	163	1.40767				142.18	183	1.42882			124.377	156	0.696926
						156.885	207	1.45544	179.574	254	1.64284	143	180	1.09941	142.59	174	0.545181				129.869	165	1.13054				155.393	197	1.88989			124.393	156	0.697515
						156.902	216	1.44477	143.197	187	1.40667	166.967	229	1.11466	147.689	179	0.759131				123.393	148	0.858649				150.492	201	1.68588			124.41	156	0.697593
						156.951	193	1.25438	141.508	182	1.41735	215.508	301	1.99235	134.639	166	0.641118				141.902	170	0.944506				142.115	187	1.31051			124.426	156	0.697616
						156.967	206	1.51498	147.738	179	1.57604	170.475	241	1.75652	145.213	183	0.595268				137.852	184	1.15677				141.689	177	1.71722			124.443	156	0.69771
						156.967	189	1.31807	148.672	193	1.43972	139.443	177	1.14303	136.951	182	0.521629				140.393	187	1.5884				152.77	200	1.52146			124.443	156	0.69782
						156.984	196	1.46587	140.557	180	1.32055	141.623	181	0.568176	147.098	187	1.07033				148.656	204	1.40295				152.049	205	1.87102			124.459	156	0.698
						157.049	187	1.98813	147.852	201	1.25258	157.016	192	0.835128	163.77	220	1.38009				124.508	165	0.833065				128.393	164	0.805692			124.459	156	0.698392
						157.082	198	1.1268	141.246	181	1.09919	151.607	206	1.4531	138.131	165	0.725551				147.787	202	1.49355				136.492	179	1.32563			124.475	156	0.698553
						157.148	194	1.13226	152.623	200	1.21293	140.082	179	1.23611	135.475	177	0.68229				130.967	162	0.982555				138.705	189	1.16099			124.475	156	0.698603
						157.148	187	0.970006	139.934	189	0.706829	178	233	1.15525	132.508	169	0.528995				130.82	167	0.713823				153.197	207	1.45798			124.492	156	0.698904
						157.148	207	1.50832	134.115	168	0.645806	141.279	175	0.8266	151.098	193	0.826491				139.459	172	0.989757				129.869	165	1.155			124.492	156	0.699226
						157.262	202	1.13872	144.672	183	0.901275	137.443	191	0.765013	132.508	165	0.439933				124.672	150	0.821264				143.41	179	1.65176			124.508	156	0.699266
						157.311	206	1.4727	132.82	173	0.731913	180.262	246	1.9955	132.328	181	1.01143				134.607	186	1.00144				131.574	165	0.975525			124.508	156	0.700026
						157.41	206	1.05125	143.918	178	1.40973	155.607	213	0.856167	133.672	164	0.393793				153.803	193	1.84726				152.082	208	1.46818			124.508	156	0.700533
						157.426	198	1.02689	157.967	210	1.50969	138.246	179	0.772326	134.459	168	1.37285				132.164	161	0.909699				136.869	175	0.967479			124.525	156	0.700569
						157.475	229	1.45827	133.131	176	1.40913	158.246	199	1.16203	136.049	174	0.421777				134.18	171	0.967331				151.951	208	1.8097			124.525	156	0.701118
						157.557	189	1.62468	151.213	197	1.40114	146.557	180	0.889513	119.787	153	0.555937				128.738	163	0.553439				134.295	184	0.732707			124.541	156	0.701605
						157.59	207	0.615064	135.541	178	1.02534	160.721	214	1.5764	124.803	158	0.404038				142.82	188	1.28285				138.344	184	1.15912			124.541	156	0.702357
						157.656	192	0.908499	146.475	189	1.66983	168.902	210	1.21184	128.869	162	1.00458				135.295	166	0.63659				136.344	177	1.14302			124.557	156	0.702404
						157.705	202	1.58846	137.443	176	0.993629	144.82	182	0.816904	119.41	152	0.670009				134.951	178	0.438526				123.852	151	1.07784			124.557	156	0.702432
						157.754	205	1.321	128.279	162	1.0038	172.918	227	1.24346	118.836	146	0.563312				138.23	176	1.28113				126.475	166	0.852385			124.557	156	0.702497
						157.82	215	1.19335	139.033	174	1.57158	181.033	232	1.93184	131.393	164	0.369026				142.049	196	0.89173				127.82	165	0.73203			124.574	156	0.702514
						157.836	201	1.26286	130.557	162	0.765054	161.803	199	1.37142	142	186	1.18274				144.721	174	0.915632				135.508	172	1.25221			124.574	156	0.702826
						157.852	206	0.87161	133.082	186	1.26506	163.82	206	1.82219	125.18	170	0.501139				137.475	174	0.984976				137.148	180	1.35723			124.574	156	0.702886
						157.885	219	1.51904	149.639	206	1.53304	158.557	214	1.51112	133.377	160	0.67375				142.262	184	1.2387				139.443	207	1.15076			124.574	156	0.702943
						157.951	214	1.56187	132.328	161	1.11404	173.607	245	1.11886	128.148	153	0.493909				135.934	172	0.865309				126.574	162	1.01022			124.574	156	0.703001
						157.951	222	0.910438	131.459	159	1.03706	188.164	281	1.06401	131.656	168	0.841153				135.508	159	1.12685				126.705	160	1.26134			124.574	156	0.70342
						158.016	205	1.29341	131.098	165	1.09313	190.23	265	1.67269	130.623	167	0.361479				128.148	165	0.938057				145.738	200	1.31528			124.574	156	0.70353
						158.033	196	0.941669	137.197	172	1.42865	150.426	201	1.57374	133.656	163	0.642594				125.918	163	0.69392				138.951	188	1.09551			124.59	156	0.703875
						158.279	199	1.32364	130.049	169	0.824679	146.148	185	0.772442	142.672	219	1.18963				135.459	184	0.888998				133.541	180	0.938504			124.59	156	0.70402
						158.443	214	1.27204	145.098	192	1.68685	144.721	180	0.769049	133.213	168	0.896997				134.918	168	0.945426				139.426	207	1.35097			124.59	156	0.704093
						158.475	222	1.60901	146.082	180	1.7365	182.59	240	0.947511	107.836	137	0.438708				130.459	160	0.733744				152.328	196	1.83817			124.607	156	0.7045
						158.525	203	1.30464	134.115	165	1.3024	160.721	202	1.1707	136.508	193	0.894406				131.377	167	0.779974				130.475	155	0.917922			124.607	156	0.704661
						158.541	228	1.33404	132.59	175	0.894986	157.033	201	1.01542	132.295	178	0.666758				127.426	162	0.653281				136.082	172	1.26178			124.607	156	0.705292
						158.721	195	1.62722	129.115	166	0.960891	158.787	196	1.20957	118.492	159	0.749152				135.852	164	1.17659				134.574	192	1.0189			124.623	156	0.705555
						158.738	210	1.12655	133.41	178	0.929861	150.918	195	1.08452	130.836	160	0.473774				168.098	237	1.79917				123.607	150	1.12141			124.623	156	0.705654
						158.787	214	1.32552	123.246	154	0.812097	191.443	288	1.77728	132.295	164	0.542202				146.574	196	1.1478				140.918	188	1.43133			124.623	156	0.705809
						158.82	197	1.4727	136.311	174	1.40865	142.475	180	0.954148	147.492	199	1.42131				158.902	209	1.86668				133.459	165	0.762039			124.639	156	0.706031
						158.836	193	1.62019	126.426	168	0.731135	132.902	171	0.80391	127.754	169	0.596589				128.311	164	0.918589				129.836	159	0.882208			124.639	156	0.706368
						158.934	205	1.60795	124.574	160	0.838375	162.246	203	1.31432	126.295	165	0.890046				137.672	173	1.17437				140.164	170	1.47059			124.656	156	0.706633
						158.967	225	1.28345	135.197	177	1.16207	142.23	186	1.03236	124.951	155	0.570682				137.82	169	1.33897				148.689	186	1.28152			124.656	156	0.706829
						159	204	1.38744	143.082	178	1.14156	188.508	238	1.21502	134.77	177	1.05618				130.557	168	1.09092				148.098	194	1.41986			124.656	156	0.706916
						159	191	1.10759	127.934	154	1.05222	195.77	256	1.49118	142.623	174	1.37959				127.426	156	0.715062				139.984	189	1.02146			124.656	156	0.707011
						159.049	202	1.26367	137.098	185	1.16254	153.672	214	1.08466	138.639	167	1.38542				129.984	169	0.937125				149.852	188	1.20233			124.656	156	0.707376
						159.262	201	0.690893	139.361	176	1.26116	252.246	383	1.89799	132.262	162	0.589936				135.672	168	1.34048				137.295	172	0.977708			124.672	156	0.708024
						159.328	204	0.795134	139.148	189	1.18544	169.066	240	0.949173	128.656	175	0.777001				123.115	152	0.809367				124.787	152	0.535801			124.672	156	0.708111
						159.344	201	1.41524	149.164	211	1.32278	167.836	211	1.72553	120.033	164	0.315984				162.475	222	1.80115				144.754	186	1.72406			124.689	156	0.708412
						159.361	243	1.49965	159.82	224	1.51493	160.475	214	0.793964	126.41	162	0.687614				141	188	1.30071				139.787	181	1.34188			124.689	157	0.708501
						159.426	202	1.3012	153.754	206	1.78317	166.115	210	0.498756	132.705	162	1.04425				126.443	168	0.587684				128.23	164	1.12043			124.689	157	0.708682
						159.443	205	0.804624	132.82	167	0.652331	170.443	214	1.07532	112.131	141	0.809752				128.656	166	0.868025				145.918	197	1.24297			124.689	157	0.708964
						159.459	203	1.89655	142.311	194	1.35616	164.934	215	1.21796	129.689	175	0.698392				126.984	164	0.830359				159.59	221	1.975			124.689	157	0.709103
						159.508	194	1.26391	134.328	169	1.02946	178	227	1.32452	125.787	169	0.908746				148.754	183	1.25289				125.295	160	0.799299			124.689	157	0.709117
						159.623	223	1.25552	123.016	161	0.539548	149.77	202	1.14712	117.033	145	0.656251				151.77	209	1.0861				127.918	191	0.964327			124.689	157	0.709673
						159.721	200	0.993147	137.213	176	0.725224	176.918	211	1.54347	137.148	175	1.30339				143.508	182	0.993224				125.41	168	0.911102			124.705	157	0.710092
						159.721	195	1.18019	147.836	189	1.85391	166.164	222	1.29707	129.721	181	1.0194				145.951	190	1.86059				129.689	161	0.792149			124.705	157	0.710135
						159.77	219	1.16741	130.279	164	1.10712	180.23	232	1.96547	133.869	171	1.51958				126.574	165	0.948577				137.213	176	1.33459			124.705	157	0.710137
						159.787	204	1.38261	136.869	180	1.13423	139.557	188	1.11717	125.197	150	0.85539				144.066	214	1.29588				147.475	189	1.72389			124.705	157	0.710143
						159.852	217	0.973563	133.689	168	1.15267	151.836	187	0.670198	122.18	156	0.762182				132.623	164	1.02186				130.852	169	0.841305			124.721	157	0.71032
						159.869	211	1.87139	136.115	179	1.3457	178.148	220	1.7894	122.59	149	0.697616				140.016	168	1.52011				153.574	193	1.888			124.738	157	0.710603
						159.902	201	1.17081				176.033	218	1.17003	124.639	162	0.703001				137.541	182	0.992658				127.803	154	0.6111			124.738	157	0.711247
						159.934	212	0.959542				146.475	180	1.0037	117.574	163	0.554422				129	167	0.79723				134.459	176	1.01618			124.754	157	0.711667
						159.951	203	1.70445				137.803	175	0.884641	124.492	153	0.892836				135.475	168	1.35959				123.836	161	1.00645			124.77	157	0.712428
						160.049	200	1.06838				145.639	178	1.42691	119.443	147	0.588182				128.115	154	0.723465				135.836	171	0.860441			124.77	157	0.71245
						160.066	196	1.31393				155.852	192	0.805004	118.541	145	0.69782				133.885	164	1.4747				159.656	200	1.76935			124.787	157	0.712508
						160.066	215	1.46468				192.049	246	1.16503	129.311	163	1.16238				129.984	160	1.11708				129.885	166	1.00279			124.787	157	0.712952
						160.082	199	1.3779				167.23	236	1.62005	132.721	179	1.3207				138.689	183	0.9761				126.525	159	0.916629			124.803	157	0.712991
						160.115	205	1.28682				141.738	206	0.800914	123.951	153	0.878163				132.836	167	0.728124				140.459	184	1.05392			124.803	157	0.713344
						160.164	210	0.79899				175.902	234	1.02186	126.738	163	0.927036				131.344	158	1.21457				128	158	0.708964			124.82	157	0.713386
						160.197	211	1.26933				154.852	191	0.846841	119.951	160	0.699266				137.656	186	1.23374				146.885	177	1.67727			124.82	157	0.713756
						160.311	206	1.48142				146.41	175	0.680948	122.475	161	0.872068				122.984	148	0.903377				152.574	187	2.15392			124.836	157	0.713823
						160.574	211	0.77093				137.902	177	0.860728	122.049	158	0.975452				124.967	152	1.00997				137.131	176	1.18741			124.836	157	0.714002
						160.656	220	0.875454				151.148	191	0.970029	110.197	154	0.62454				121.525	150	0.846895				139.295	186	1.36643			124.836	157	0.714081
						160.656	202	1.22126				158.885	206	0.763572	124.197	172	1.07994				130.18	161	1.1127				149.656	189	1.49148			124.852	157	0.714467
						160.689	210	0.814651				165.639	212	0.775861	127.885	176	1.05469				141.197	188	1.5457				136.623	176	0.941992			124.852	157	0.714566
						160.721	211	1.17146				160.672	228	0.725901	111.672	141	0.537593				142.197	179	1.35143				152.131	190	1.80176			124.869	157	0.714617
						160.77	203	0.850773				151.164	205	0.762615	122.41	163	0.966745				136.262	174	1.40332				126.41	167	0.63443			124.869	157	0.71497
						160.902	239	1.24035				155.016	197	0.89254	114.246	147	0.576631				127.377	162	1.06985				134.033	177	0.835346			124.885	157	0.715062
						161.016	196	1.38908				132.344	177	0.921765	113.541	133	0.670313				132.803	180	1.08181				139.23	177	1.43285			124.885	157	0.715202
						161.016	205	1.63758				136.213	169	0.923121	134.951	171	1.43088				129.082	169	1.25053				134.197	175	1.17936			124.918	157	0.715488
						161.033	206	1.06742				191.213	244	1.53398	117.344	139	0.511669				124.557	160	0.82474				129.689	162	0.930246			124.918	157	0.7156
						161.246	200	1.74512				159.508	216	1.802	125.77	160	0.960439				126.262	157	1.0013				161.475	230	1.57535			124.918	157	0.715744
						161.311	218	0.957113				152.459	191	1.53442	120.082	155	0.856166				127.623	181	1.0353				127.918	165	0.884038			124.934	157	0.715756
						161.328	199	1.19087				157.426	207	1.14284	119.607	152	0.881147				118	142	0.593749				139.475	180	1.27046			124.934	157	0.71605
						161.328	221	1.25221				173.131	264	1.39344	114.525	151	0.670649				139.656	169	1.27042				152.721	191	1.67647			124.951	157	0.716145
						161.475	216	1.10788				162.131	212	1.15941	117.656	142	0.663057				128.951	156	1.05064				127.131	167	0.776314			124.951	157	0.71681
						161.475	218	1.2563				145.049	213	1.1761	125.049	154	0.944001				123.82	167	0.840667				133.639	170	1.26921			124.967	157	0.716994
						161.508	251	1.10074				136.639	178	1.03251	128.738	171	0.928708				126.557	156	1.0113				142.803	178	1.47204			124.967	157	0.7174
						161.557	212	1.5005				147.967	187	0.976601	120.475	157	0.804186				119.23	155	0.820475				138.311	173	1.10881			124.984	157	0.717488
						161.787	207	1.6617				135.525	165	0.945902	119.918	163	0.676017				123.836	164	0.729221				123.082	155	1.08686			124.984	157	0.717515
						161.787	199	1.23487				175.705	224	1.37932	117.18	134	0.840228				136.787	181	0.967273				133.066	183	1.16202			124.984	157	0.71836
						161.885	231	0.977491				167.59	211	1.62248	114.738	142	0.668083				124.475	161	0.732297				124.262	154	0.702826			125	157	0.718921
						161.918	214	1.1125				130.295	173	0.986697	122.066	161	0.676943				123.066	144	1.06879				126.705	157	1.05882			125.016	157	0.718934
						161.984	204	1.5441				148.066	179	0.659669	116.115	134	0.787053				148.885	191	1.88082				130.016	166	1.16189			125.033	157	0.718936
						162	207	0.818				145.738	182	1.26126	119.197	158	0.597163				127.148	163	0.951852				124.459	163	1.07512			125.033	157	0.719223
						162.098	232	1.18799				139.18	178	0.993368	124.82	155	1.21141				137.639	173	1.16913				124.377	152	1.0765			125.033	157	0.719259
						162.18	208	1.01295				157.131	229	1.34442	124.393	170	0.858682				136.967	170	1.32189				118.148	138	1.22055			125.049	157	0.719394
						162.23	199	1.0338				152.508	210	1.45034	121.672	148	0.977619				145.639	186	1.3352				116.689	150	0.710143			125.049	157	0.71944
						162.246	224	1.08509				134.82	165	1.0797	117.918	136	0.980783				131.607	180	0.874529				126.197	161	1.03961			125.082	157	0.719509
						162.295	200	1.17041				147.967	202	1.6688	130.705	161	1.48856				145.934	194	1.50137				114.098	153	2.23477			125.098	157	0.719979
						162.475	232	1.39084				144.213	195	1.47799	129.311	155	1.03144				129.951	155	1.29848				122.033	151	0.769032			125.098	157	0.720236
						162.557	202	1.34904				142.77	172	1.18408	134.475	165	1.36449				140.623	187	1.28881				137.393	174	1.49127			125.098	157	0.720298
						162.557	202	1.46337				151.869	190	1.22687	123.607	158	0.851113				137.492	171	1.06822				130.918	162	0.983736			125.098	157	0.720812
						162.721	225	1.13464				139.475	199	0.687303	120.164	146	0.625147				127.885	154	1.12706				132.393	167	1.271			125.131	157	0.721234
						162.918	209	1.43803				143.098	173	0.63974	128.279	158	1.41227				154.213	199	1.70926				134.131	179	0.846634			125.131	157	0.721606
						162.967	211	1.1417				148.295	190	0.944095	122.951	153	0.834069				120.607	157	0.658338				134.295	184	1.39533			125.148	157	0.722043
						162.984	231	1.14065				131.377	165	0.695569	125.721	166	0.965928				134.77	184	0.630182				124.885	164	0.756709			125.148	157	0.722065
						163.066	210	1.21561				146.721	180	0.676715	119.59	146	0.749719				162.574	218	1.5814				152.525	199	1.44057			125.164	157	0.722329
						163.082	212	1.28351				153.016	204	1.19108	121.59	153	0.90717				163.869	215	1.78381				124.623	154	1.26062			125.164	157	0.722589
						163.115	205	1.61458				157.738	216	1.04546	117.426	152	0.665333				121.77	152	0.673334				131.361	165	1.1048			125.164	157	0.723465
						163.115	209	1.30125				148.934	190	0.958816	129.984	170	1.13057				135.393	180	1.10279				126.656	157	1.16925			125.164	157	0.723607
						163.213	227	1.23915				155.344	196	1.05883	117.77	157	0.725957				143.82	187	1.74062				125.246	156	0.836849			125.164	157	0.723784
						163.262	234	0.990988				148.705	193	1.09006	142.328	189	1.59676				127.738	157	0.914119				124.656	159	0.98551			125.18	157	0.723971
						163.279	229	1.39728				155.557	189	1.61991	128.131	163	1.23801				136.377	181	1.21653				138.754	164	1.73443			125.18	157	0.723978
						163.393	195	1.07213				160.754	201	1.29944	120.475	147	0.531335				152.033	196	1.6099				134.459	177	1.14503			125.18	157	0.724277
						163.443	224	1.39957				165.328	226	1.30531	127.492	158	1.01056				131.525	168	0.83802				129.295	180	0.980588			125.18	157	0.724426
						163.508	212	1.64264				155.574	195	0.951863	121.951	157	0.512889				135.164	183	0.951187				124.016	165	0.838705			125.197	157	0.724786
						163.59	212	1.13231				148.721	210	0.959184	118.623	144	0.842088				129.721	154	1.20933				128.475	166	1.14689			125.197	157	0.725224
						163.623	210	1.5812				172.869	238	1.42425	118.77	153	0.672883				128.475	161	0.67113				125.984	157	0.947798			125.197	157	0.725551
						163.689	225	0.939232				166.705	198	1.82002	120.803	153	0.633173				137.508	174	1.28494				132.541	163	1.11566			125.213	157	0.725901
						163.754	201	1.32888				146.23	201	0.909811	119.541	145	0.637134				126.164	161	0.90704				127.18	161	1.04359			125.23	157	0.725925
						163.754	219	1.50626				140.311	169	1.2598	117.557	146	0.666071				126.131	161	1.09613				130.164	160	1.19731			125.246	157	0.725957
						163.787	212	1.76266				180.836	256	1.80468	140.148	190	1.35608				126.754	161	0.739369				117.869	162	0.546362			125.246	157	0.726052
						163.967	208	1.5755				153.902	195	1.61751	120.82	159	0.614887				126.639	162	1.07193				133.951	173	1.34			125.246	157	0.726366
						164	215	1.67952				171.639	231	0.987412	120.82	153	0.591405				122.721	157	0.57489				145.492	198	1.67132			125.262	157	0.726429
						164.131	207	0.876465				155.803	190	1.46857	135.492	169	1.54992				127.066	161	0.645722				155.77	193	1.57668			125.262	157	0.726493
						164.131	221	1.26226				143.902	192	0.957257	124.164	150	1.18331				141.951	178	0.913425				137.508	180	1.27475			125.279	157	0.726734
						164.148	210	1.24069				158.377	201	1.028	127.951	166	0.993383				140.197	178	1.31365				138.41	181	1.22128			125.279	157	0.726833
						164.213	203	1.45514				168.049	202	0.979437	144.508	192	1.03703				126.262	159	0.89052				135.721	176	1.27142			125.279	157	0.726878
						164.311	211	1.46521				141.738	190	0.929542	126.426	155	0.702357				123.115	157	0.755643				131.918	171	1.04515			125.295	157	0.726942
						164.59	216	0.984994				158.131	211	1.20244	128.623	161	1.31322				120.525	155	0.769405				162.721	265	1.43439			125.295	157	0.726951
						164.59	205	1.34832				168.426	225	0.903953	130.377	159	1.05868				136.902	187	1.44126				138.754	189	1.37755			125.295	157	0.726973
						164.77	209	1.61058				147.377	194	1.14677	131.492	159	0.890929				147.934	196	1.42022				128.033	158	1.02331			125.295	157	0.727265
						164.77	197	1.11434				132.574	171	1.06379	130.951	164	0.797362				124.426	149	0.693989				124.23	167	0.660225			125.295	158	0.727919
						164.852	213	1.45361				151.508	196	1.10024	126.738	172	0.939118				149.361	185	1.37372				131.262	166	1.14643			125.295	158	0.728124
						164.885	215	1.64223				143.574	191	1.01532	123.672	154	0.595602				155.984	231	1.35168				141.803	182	1.08417			125.311	158	0.728177
						165.049	202	1.39558				161.77	208	0.875198	117.033	148	0.894166				151.984	231	1.22069				129.672	161	0.988479			125.311	158	0.728223
						165.164	194	1.41249				156.967	218	1.5358	119.148	145	0.609736				133.803	169	1.18275				135.361	170	0.916555			125.328	158	0.728278
						165.18	207	0.844767				162.18	197	0.994261	129.246	176	1.15362				135.967	184	1.24209				130.115	166	0.97565			125.328	158	0.728292
						165.541	216	1.53657				151.639	188	1.5786	125.131	161	0.852939				135.869	172	1.21804				127.377	158	1.09065			125.328	158	0.728314
						165.639	215	1.48819				149.082	191	0.944697	120.295	147	0.838209				142.279	174	1.46718				128.377	172	0.723971			125.328	158	0.728376
						165.754	226	1.5479				138.016	169	1.08135	117.902	149	0.656286				133.164	173	1.40196				132.607	173	1.15371			125.344	158	0.728604
						165.803	219	0.670464				154.607	195	0.954966	121.984	150	0.692428				121.18	148	0.850869				146.623	186	1.64629			125.344	158	0.728715
						165.918	232	1.35985				169.787	228	1.52639	122.934	150	0.676092				151.082	201	1.67857				128.77	159	1.16329			125.361	158	0.729221
						165.951	217	0.818516				172	239	1.49076	117.328	146	0.412025				143.328	208	1.35085				155.82	204	1.95194			125.361	158	0.729403
						166.033	209	1.73617				143.197	192	0.767811	142.59	189	0.966236				135.787	168	1.28265				127.295	163	1.04283			125.361	158	0.729461
						166.344	215	1.5873				139.754	201	1.04043	131.984	170	1.01133				129.459	165	1.13702				136.295	178	1.33226			125.361	158	0.729465
						166.41	200	1.27114				141.59	183	1.37965	129.557	163	1.14231				129.787	164	0.832913				135.869	179	1.42563			125.377	158	0.729553
						166.41	210	1.05204				153.754	204	1.09529	124	154	1.12923				134.705	169	1.16308				132.836	176	1.02153			125.393	158	0.729626
						166.41	252	1.51129				142.689	180	1.43226	126.885	164	1.09442				123.918	154	0.723978				127.705	170	0.588483			125.393	158	0.729632
						166.508	224	1.32651				155.213	224	1.35458	117.328	150	0.523837				124.525	159	0.762458				136	176	1.30839			125.393	158	0.729728
						166.508	223	1.07249				154.541	205	0.846228	125.656	166	0.73414				123.082	150	0.948621				147.131	199	1.39061			125.41	158	0.730231
						166.607	226	1.20995				149.557	200	1.1218	126.148	151	0.935302				122.951	162	0.894745				134.754	164	1.32141			125.41	158	0.730542
						166.656	230	1.24236				136.574	186	1.13477	120.213	149	0.65495				119.377	150	1.0155				132.672	166	1.20769			125.41	158	0.730561
						166.754	251	1.82286				147.361	205	1.46525	121.246	158	0.522209				148.852	198	1.53664				126.852	160	0.940824			125.443	158	0.730612
						166.787	219	0.626217				143.082	189	1.38122	128.656	171	1.2375				117.049	143	0.730957				125.082	156	0.909996			125.459	158	0.730763
						166.869	214	1.25239				140.82	203	1.0708	131.508	177	1.1303				138.639	180	1.18569				142.557	185	1.3677			125.459	158	0.730957
						166.934	221	1.53971				150.311	197	1.2458	118.18	153	0.688853				130.77	163	0.705654				135.934	171	1.11278			125.475	158	0.731135
						166.984	218	0.777319				164.213	217	1.75991	132.623	179	1.18454				134.049	168	0.796383				132.541	177	1.05646			125.475	158	0.731806
						167.082	218	0.68226				142.557	179	1.22133	118.098	144	0.618865				155.77	194	2.0737				131.164	170	0.87238			125.475	158	0.731913
						167.148	227	1.21156				151.082	199	2.55231	124.016	162	0.662614				125.607	151	0.95962				141.082	177	1.13179			125.475	158	0.731943
						167.164	232	0.948341				138.557	178	0.804666	124.885	173	0.578849				141.508	197	1.23586				139.77	173	1.77794			125.475	158	0.73203
						167.197	226	1.23817				139.344	181	0.914093	131.41	171	0.949153				141.689	188	1.06563				131.705	178	1.05445			125.492	158	0.732104
						167.213	220	0.761996				148.164	182	1.36413	119.066	159	0.682535				122.508	151	0.585374				123.934	154	1.03323			125.508	158	0.732292
						167.311	233	1.3865				163.443	215	1.53213	131.262	160	0.634974				124.836	158	0.698603				124.361	155	0.884386			125.557	158	0.732297
						167.607	224	0.776037				145.328	180	0.912275	127.623	157	1.01416				125.607	158	0.75142				131.77	175	1.01296			125.557	158	0.732301
						167.656	247	1.62313				162.41	217	1.46962	126.508	156	0.940285				129.885	161	0.880763				124.279	161	0.985109			125.574	158	0.732504
						167.82	243	1.44525				158.59	203	1.12813	130.344	165	0.643512				159.934	225	1.39959				121.77	161	0.930936			125.59	158	0.732536
						167.82	201	1.11111				166.197	200	0.812391	132.148	171	0.627532				127.148	161	0.657429				132.082	175	1.21627			125.607	158	0.732707
						167.836	223	1.45822				152.902	193	1.20747	126.279	166	1.03553				128.213	169	0.833483				129.328	156	1.25454			125.607	158	0.732827
						167.885	213	1.56108				166.033	210	1.04258	137.918	180	1.08632				124.59	160	0.537657				153.787	191	1.80686			125.607	158	0.733178
						167.951	209	0.949968				163.049	199	0.752438	129.262	164	0.410008				128.902	177	0.825152				129.59	175	1.14373			125.607	158	0.733312
						168.049	235	1.40113				138.656	183	0.715744	132.803	181	0.908135				123.246	152	0.956399				155.148	223	1.3315			125.607	158	0.733517
						168.066	218	0.933895				156.967	197	0.945275	115.787	140	0.666909				123.525	154	0.81406				158.213	229	2.00618			125.607	158	0.73367
						168.23	218	1.59114				163.59	208	1.63309	118.098	151	0.51872				135.525	189	1.19934				137.738	177	1.20739			125.623	158	0.733744
						168.246	223	1.29871				165.098	214	0.85172	122.459	155	0.729465				154.557	211	1.44914				147.902	239	1.25136			125.623	158	0.733828
						168.262	221	1.34266				145.59	173	1.29469	121.016	157	0.729626				126.639	169	0.902882				154.361	215	1.96125			125.639	158	0.73414
						168.279	234	1.01997				151.902	192	1.12926	133.557	172	1.01124				142.279	195	1.53274				134.377	166	1.0292			125.639	158	0.734272
						168.41	225	1.30333				163.016	199	0.732301	124.508	163	0.894176				127.902	165	0.823909				150.262	195	1.29292			125.656	158	0.734441
						168.508	230	1.26015				151.033	202	0.938326	119.689	158	0.496113				148.525	195	1.38125				146.557	201	1.01388			125.656	158	0.734662
						168.557	227	0.743792				173.246	219	1.45061	124	158	0.700569				130	168	0.854512				142.377	197	1.3819			125.656	158	0.735183
						168.557	241	1.64953				142.721	175	0.774879	135.492	169	1.08478				137.852	175	0.917856				133.18	158	1.18171			125.689	158	0.735281
						168.607	221	1.42462				180.197	228	2.32111	122.869	157	0.39021				132.689	170	0.962924				123.41	163	0.902936			125.689	158	0.735304
						168.705	225	1.59533				166.492	218	1.54086	129.23	172	0.654329				157.852	185	2.05354				124.295	164	0.790461			125.705	158	0.735604
						168.787	218	1.27276				170.787	213	1.515	121.656	157	0.633746				150.377	186	1.69098				149.23	197	1.54621			125.705	158	0.735931
						169.016	215	1.32252				173.885	219	1.54382	135.197	194	1.30124				129.918	155	1.0869				145.607	201	1.56957			125.721	158	0.736395
						169.066	214	1.61116				165.098	212	1.56036	122.623	159	0.660889				148.852	198	1.84736				128.721	161	0.953612			125.721	158	0.736561
						169.213	241	1.47271				202.443	258	1.74106	124.279	153	0.611873				125.623	150	0.592042				130.934	170	1.00183			125.721	158	0.737087
						169.23	209	1.37456				147.393	179	1.16868	136.459	178	1.4093				136.213	167	1.11238				129.197	161	0.983849			125.738	158	0.737508
						169.459	207	1.96417				156.852	184	1.34147	119.328	157	0.633831				132.246	164	1.04326				128.967	157	0.92997			125.754	158	0.737639
						169.475	225	1.31567				166.197	201	0.784391	121.213	161	0.742475				128.459	189	0.712428				152.508	235	1.46428			125.77	158	0.737841
						169.541	198	1.61822				148.377	175	0.780771	124.656	149	0.856478				125.164	162	1.09475				138.492	171	1.15208			125.77	158	0.737878
						169.672	220	1.65568				177.787	221	1.51839	127.197	165	0.732536				144.902	189	1.17814				127.246	153	0.860473			125.77	158	0.738037
						169.836	235	1.52355				186	226	0.881258	128.705	182	1.10385				140.213	174	1.28534				153.705	187	1.62579			125.77	158	0.738765
						169.836	215	1.546				157.475	204	1.1812	121.951	166	0.68506				140.836	203	1.09777				147.016	200	1.42317			125.787	158	0.739369
						170	232	1.53721				159.705	221	1.42887							131.508	166	1.08499				129.016	173	0.880117			125.803	158	0.73957
						170.049	221	0.925791				186.639	245	1.78567							128.492	155	0.957994				154.492	210	1.81135			125.803	158	0.739884
						170.066	209	1.99065				152.279	193	1.89916							138.443	174	1.41479				134.738	184	0.874588			125.82	158	0.739911
						170.213	211	1.39324				168.049	203	1.16408							127.459	164	0.948488				139.344	184	1.34807			125.82	158	0.739954
						170.262	252	1.79968				166.197	223	1.19799							132.836	177	0.823406				139.82	174	1.08218			125.82	159	0.739993
						170.279	223	1.76667				180.639	255	1.61937							141.902	185	1.16914				154.77	223	1.84159			125.836	159	0.740315
						170.361	216	1.88322				180.508	227	1.39216							149.23	200	1.42121				140.197	186	1.36721			125.836	159	0.740441
						170.492	218	1.11074				172.885	217	0.971203							143.984	180	1.42548				136.803	181	1.14332			125.852	159	0.740506
						170.689	224	1.1452				180.459	219	1.60113							129.656	164	1.37278				123.934	154	0.971418			125.852	159	0.741247
						170.721	229	1.38471				224.705	299	1.74255							131.738	170	1.14155				140	201	1.37971			125.852	159	0.741283
						170.902	227	1.06849				160.213	235	0.58108							139.443	172	1.69154				131.033	179	1.16479			125.869	159	0.741358
						170.934	257	1.44935				177.492	244	1.38222							123.492	153	1.08602				125.164	157	1.09345			125.869	159	0.741527
						171.082	221	1.416				163.885	206	1.10003							129.672	167	1.12187				139.918	186	1.38404			125.869	159	0.741679
						171.131	211	0.822999				166.902	206	1.37986							138.803	173	1.33375				140.295	178	1.39592			125.885	159	0.742127
						171.164	232	1.25696				171.393	215	0.92344							132.459	169	0.818441				132.311	160	1.16203			125.885	159	0.742136
						171.328	214	1.91779				164.984	202	1.11851							143.492	182	1.28052				142.984	183	1.34335			125.902	159	0.742475
						171.344	219	1.38494				156.082	200	1.01577													126.426	155	0.780126			125.902	159	0.742668
						171.344	232	1.51768				214.164	350	1.75509													135.541	180	1.19561			125.902	159	0.743307
						171.344	230	1.19395				180.082	244	1.035													138.721	179	1.29543			125.918	159	0.743421
						171.426	229	1.65446				193.623	240	1.84325													123.803	165	0.815609			125.934	159	0.743473
						171.656	237	1.51286				182.967	244	1.09954													135.475	175	1.40998			125.951	159	0.74371
						171.689	218	1.74553				163.738	204	1.13847													132.082	183	1.07489			125.951	159	0.743792
						171.852	209	1.72684				169.23	207	1.4289													145.426	181	1.43803			125.951	159	0.743864
						171.869	220	1.98405				169	211	1.2078													131.738	168	0.733828			125.967	159	0.744312
						171.984	248	1.26796				174.623	225	1.19309													125.098	152	1.16438			125.984	159	0.744409
						172.082	211	1.35937				194.885	239	1.65341													125.77	164	0.971444			125.984	159	0.744625
						172.492	222	1.49392				173.393	219	1.02597													119.344	160	0.600825			125.984	159	0.744942
						172.492	231	1.36524				161.082	217	0.868852													140.705	187	1.52424			125.984	159	0.745586
						172.672	262	1.58097				160.541	198	1.17052													133.574	174	1.24982			126.016	159	0.745756
						172.787	216	1.64761				178.803	240	1.38292													148.607	193	1.62714			126.049	159	0.746732
						172.902	216	1.29554				208.59	273	1.92674													145.918	183	1.62062			126.082	159	0.746762
						172.918	205	1.25062				172.311	204	1.08683													122.672	154	0.734662			126.098	159	0.747277
						172.934	223	1.76383				175.525	204	1.53941													135.836	175	1.17101			126.098	159	0.747361
						172.951	218	1.98551				149.197	202	1.03864													132.279	171	1.22049			126.098	159	0.747541
						172.967	229	1.56734				188.541	232	1.78515													161.262	219	1.48979			126.115	159	0.747783
						172.967	235	1.66322				188.311	243	1.47919													133.426	174	1.27223			126.115	159	0.747863
						173.049	225	1.32741				154.672	192	1.12895													135	194	0.970439			126.115	159	0.748086
						173.098	224	1.66013				155.525	204	0.52934													153.721	219	1.54185			126.131	159	0.748232
						173.164	216	1.20612				183.738	226	1.48614													128.869	170	0.528222			126.148	159	0.748369
						173.197	231	1.19529				182.033	252	1.72117													123.426	172	0.858872			126.148	159	0.748382
						173.361	234	1.5041				167.443	211	1.75448													126.984	160	1.07606			126.148	159	0.74894
						173.361	217	1.57662				204.82	280	1.40396													129.623	169	1.03215			126.148	159	0.749152
						173.492	216	1.59633				164.984	201	1.47286													130.164	166	0.796923			126.148	159	0.749437
						173.508	238	1.19754				155.098	189	1.06375													137.705	169	1.24579			126.164	159	0.749487
						173.623	242	1.48249				163.607	203	1.0813													133.197	165	1.25518			126.164	159	0.749491
						173.705	215	1.92855				164.672	205	1.02467													137.918	179	0.946407			126.164	159	0.749498
						173.803	216	2.28612				190.738	261	1.30905													126.951	157	1.05387			126.164	159	0.749719
						174.049	215	1.08504				167	209	1.09053													136.18	173	1.18483			126.164	159	0.750127
						174.115	242	1.71051				183.148	227	1.734													149.623	191	1.72593			126.164	159	0.750361
						174.475	229	1.35869				169.475	225	0.683564													133.082	164	1.06963			126.197	159	0.750379
						174.525	251	1.30903				188.656	281	1.52844													123.557	151	1.08982			126.197	159	0.750447
						174.639	226	1.57116				167.115	201	0.686156													146.393	202	1.64253			126.197	159	0.751102
						174.705	241	1.90142				172.475	210	1.13492													122.721	150	1.02943			126.213	159	0.75142
						174.754	245	1.5224				176.475	235	0.852801													124.754	165	0.851247			126.213	159	0.751706
						175.115	226	1.53194				162.377	195	0.647484													131.967	161	1.09463			126.213	159	0.752077
						175.18	226	1.48956				175.082	207	1.3208													138.787	162	1.12169			126.213	159	0.752438
						175.246	215	1.39788				176.754	225	1.00602													153.689	191	1.60487			126.262	159	0.752724
						175.656	219	1.23211				161.525	217	0.863393													145.934	208	1.59043			126.262	159	0.753299
						175.721	208	1.18877				176.869	207	1.22923													179.082	227	2.21772			126.279	159	0.75337
						175.721	236	1.80815				161.754	218	1.15845													155.59	217	1.59693			126.295	159	0.753415
						176.115	229	1.59018				161.754	196	1.21649													134.852	173	1.29992			126.295	159	0.753918
						176.213	223	1.4135				166.23	205	0.999469													145.328	199	1.00947			126.295	159	0.754263
						176.262	231	1.7923				156.885	200	0.761539													133.951	166	0.87621			126.311	159	0.754367
						176.344	224	1.58218				204.869	315	1.12274													136.262	185	1.19411			126.311	159	0.755643
						176.361	245	1.58404				177.984	224	0.844923													157.639	218	1.60407			126.311	159	0.756083
						176.836	233	1.8938				156.705	207	0.735304													140.115	176	0.989262			126.328	159	0.756204
						176.869	242	1.89437				152.623	189	1.34837													126.574	156	0.859356			126.328	159	0.756228
						176.951	223	1.31289				177.344	215	0.730231													133.754	174	0.874617			126.328	159	0.756279
						177	242	1.55079				176.967	220	1.01451													134.41	177	1.01483			126.328	159	0.7567
						177.639	247	1.53237				184.213	242	1.3945													145.869	178	1.74866			126.344	159	0.756709
						177.639	237	2.1123				175.246	224	0.991845													140.59	182	1.13478			126.361	159	0.757157
						177.82	245	1.39505				179.902	222	1.17788													132.77	175	0.821438			126.361	159	0.757542
						177.885	226	2.17743				160.279	210	1.0792													128.443	162	1.1127			126.361	159	0.757824
						177.934	233	1.65353				211.984	272	1.39877													131.328	162	1.08893			126.361	159	0.758107
						178.148	261	1.10753				162.934	240	1.01807													129.41	183	0.862235			126.393	159	0.758125
						178.557	221	1.38293				187.213	230	1.89761													140.82	185	1.43201			126.393	159	0.758164
						178.59	241	1.87073				182.377	222	1.83197													125.23	154	0.826046			126.393	159	0.758407
						178.59	246	2.21764				174.541	223	1.29792													134.607	181	0.937308			126.41	159	0.758415
						178.787	246	1.68206				189.738	247	1.72207													137.033	176	1.1774			126.41	159	0.758433
						178.82	233	2.03242				163.803	215	0.776554													129.311	155	0.951766			126.41	159	0.758649
						178.902	229	1.81673				191.18	244	1.2447													130.967	185	0.898719			126.41	159	0.758854
						179.066	222	1.43817				185.902	245	1.27078													142.689	186	1.5595			126.426	159	0.759127
						179.459	225	1.87832				158.574	221	1.0332													148.656	187	1.81874			126.426	159	0.759131
						179.541	223	1.6207				196.393	253	1.55351													141.852	171	1.52748			126.426	159	0.759152
						179.689	231	1.15978				171.279	222	1.15241													133.377	184	1.1167			126.426	159	0.759906
						179.721	221	1.2806				160.705	205	1.68557													139.475	202	1.35832			126.426	159	0.760507
						179.836	234	1.66119				174.131	209	1.42636													138.59	170	1.61225			126.443	159	0.760714
						179.918	227	2.08575				155.344	216	0.986165													138.869	181	1.19831			126.459	159	0.761143
						179.984	234	1.00912				138.639	180	0.87481													132.443	172	0.976337			126.459	159	0.761287
						180.049	233	1.92888				147.557	187	0.682278													147.459	208	1.30414			126.459	159	0.761539
						180.377	248	1.19773				159.475	198	1.33814													130.393	162	1.1192			126.475	159	0.761996
						180.492	237	1.47411				161.967	199	1.34211													135.836	179	1.06949			126.475	159	0.762039
						180.541	223	2.00428				145.016	194	0.952699													131.59	161	1.10531			126.475	159	0.762086
						180.689	215	1.55097				159.148	203	1.57278													132.639	174	0.889535			126.475	159	0.762182
						180.787	238	1.60402				158	209	1.05795													131.967	166	1.20649			126.492	159	0.762284
						180.885	256	1.29703				169.115	253	1.588													135.951	178	0.99138			126.492	159	0.762458
						180.934	221	1.04234				177	226	1.64571													133.213	167	1.04027			126.508	160	0.762615
						181.066	225	1.66541				143.279	172	1.08399													136.803	186	1.07307			126.508	160	0.763103
						181.443	263	1.62306				166.23	205	0.745756													132.475	171	1.003			126.525	160	0.763238
						182.115	234	1.6228				161.623	194	1.08333													132.279	175	0.90974			126.525	160	0.763484
						182.475	306	1.63317				185.984	240	1.906													131.541	163	0.787791			126.541	160	0.763572
						182.508	248	1.25606				185.639	265	1.15016													138.541	180	1.00613			126.541	160	0.763597
						182.721	234	1.4606				144.393	177	1.01868													140.803	193	1.0334			126.557	160	0.763684
						182.934	238	1.47565				193.836	275	1.54272													138.115	167	1.24721			126.557	160	0.763825
						183.197	235	1.34095				162.23	198	1.07691													148.459	204	1.20243			126.574	160	0.763871
						183.344	260	1.42238				195.295	256	1.75828													135.967	174	1.00979			126.574	160	0.764143
						183.574	259	1.57127				186.492	250	1.33873													153.23	186	1.43982			126.574	160	0.764267
						183.705	253	1.6994				168.328	237	1.1814													131.344	157	1.14622			126.574	160	0.764653
						183.803	244	0.954949				171.754	217	1.2834													147.148	187	1.46357			126.59	160	0.764907
						183.82	223	2.01768				175.885	255	1.6748													144.213	200	1.4833			126.607	160	0.765013
						183.869	233	1.32935				176.197	240	1.1383													148.492	188	1.39182			126.607	160	0.765034
						184.016	241	1.80265				188.541	251	1.37979													136.049	162	1.30884			126.607	160	0.765054
						184.115	242	0.995732				172.492	222	1.13028													133.246	185	1.05363			126.623	160	0.765384
						184.148	249	1.44113				159.623	213	0.937122													133.967	176	1.00989			126.623	160	0.765667
						184.164	262	1.70514				192.836	237	1.31205													144.492	202	1.27106			126.623	160	0.765998
						184.59	247	1.39449				161.557	198	0.88989													123.393	159	0.986967			126.639	160	0.76606
						184.607	227	1.80786				170.574	223	0.689042													115.41	156	0.870735			126.639	160	0.766333
						184.656	238	1.26413				189.672	251	1.194													137.213	191	1.5216			126.639	160	0.766669
						185.131	241	1.71985				204.508	340	1.38911													121.754	151	1.11654			126.639	160	0.767811
						185.41	247	1.4506				162.885	190	1.82183													120.574	152	1.2669			126.639	160	0.769032
						185.541	232	1.41887				152.689	204	0.864068													120.475	156	1.03091			126.656	160	0.769049
						185.787	245	2.10585				196.934	251	1.7569													138.721	182	1.68464			126.656	160	0.769271
						186.082	244	1.45202				167.574	237	1.33249													117.852	164	0.940584			126.656	160	0.769405
						186.213	241	1.56197				177.066	216	0.547434													119	148	0.940516			126.672	160	0.76969
						186.246	254	1.48716				180.213	231	1.18129													122.639	152	1.1765			126.672	160	0.769734
						186.459	242	2.05517				185.689	239	0.93062													132.082	168	1.38205			126.672	160	0.770159
						186.475	241	1.52492				172.262	223	0.861852													119.656	152	1.1718			126.689	160	0.770177
						186.77	266	1.36483				194.328	240	1.2344													127.967	157	1.08761			126.705	160	0.770407
						187.033	236	1.29145				183.213	245	0.631176													125.836	152	1.27143			126.705	160	0.770428
						187.23	242	1.82124				164.869	211	1.03558													119.262	149	0.775877			126.705	160	0.770678
						187.492	234	2.04889				199.361	272	1.69861													145.131	193	1.46309			126.705	160	0.770725
						187.902	260	1.34489				184.41	269	1.13302													139.246	178	1.49308			126.721	160	0.77093
						188.197	256	1.75064				188.541	240	1.11163													126.803	149	1.43577			126.721	160	0.77105
						188.246	253	1.17975				197.869	268	1.24281													128.279	173	1.02147			126.738	160	0.771322
						188.541	232	1.30281				192.803	232	1.05831													135.77	170	1.53255			126.738	160	0.771638
						189.328	231	1.78965				177.033	239	1.0031													127.689	170	0.848427			126.738	160	0.771706
						189.754	231	1.81439				183.311	223	1.7542													127.672	180	0.916157			126.738	160	0.771727
						190.23	245	1.88409				179	214	1.01244													149.721	196	1.59123			126.754	160	0.771863
						190.41	239	1.52308				154.377	181	0.925207													144.328	215	1.097			126.754	160	0.772257
						190.525	251	1.67323				206.492	245	1.82537													138.951	183	1.14592			126.754	160	0.77227
						190.557	252	1.4475				173.984	228	1.45143													147.77	197	1.51655			126.77	160	0.772326
						190.934	250	1.561				178.672	220	0.799589													148.557	200	1.3944			126.77	160	0.772442
						191.131	235	2.12241				198.328	251	1.93984													141.607	185	1.32985			126.787	160	0.772484
						191.869	254	2.08777				208.59	272	1.69232													157.426	223	1.50975			126.787	160	0.772721
						191.934	307	1.61511				190.82	242	1.15309													145.918	182	1.02679			126.787	160	0.772826
						191.984	258	1.55602				174.754	211	0.555456													139.639	178	1.42931			126.803	160	0.772866
						192.607	269	1.97072				224.803	335	1.60022													143.082	197	1.49121			126.803	160	0.773215
						193.18	244	1.97583				173.066	217	0.939202													133.623	174	1.03229			126.803	160	0.773321
						193.689	299	0.86454				195.033	258	1.23084													126.754	169	0.9808			126.803	160	0.773605
						193.705	271	1.60557				262.443	394	1.6443													127.016	173	1.03181			126.803	160	0.774433
						193.82	272	1.45625				189.475	237	1.00142													129.262	164	0.912785			126.82	160	0.774439
						194.328	284	1.39645				209.754	290	1.32077													138.656	175	1.36878			126.82	160	0.774453
						194.41	272	2.14085				191.705	250	1.31205													128.705	179	1.04382			126.836	160	0.774879
						195.607	279	1.96159				181.754	232	1.49007													138.525	174	1.25076			126.852	160	0.775205
						197.082	239	1.49302				210.984	284	1.6319													125.689	152	0.972271			126.852	160	0.77535
						197.607	304	1.33716				177.836	226	1.07895													127.443	170	0.617297			126.869	160	0.775586
						197.803	291	1.55256				192.787	265	1.31364													134.459	170	1.03871			126.885	160	0.775741
						198.672	278	1.66916				185.574	230	0.788552													133.197	171	1.25428			126.885	160	0.77579
						198.705	264	2.12876				172.689	223	0.907116													129.852	180	1.10459			126.885	160	0.775861
						199.082	255	1.97774				184.836	223	0.754367													134.984	182	1.30333			126.885	160	0.775877
						199.115	285	1.85258				177.344	214	0.690002													128.459	163	0.895876			126.902	160	0.775906
						199.934	337	1.53889				169.344	208	0.75337													148.23	195	1.78392			126.902	160	0.775909
						200.131	266	2.1143				182.541	232	1.09828													135.41	184	0.95796			126.902	160	0.776037
						200.721	271	2.09065				195.328	232	1.26252													125.902	165	1.0191			126.902	160	0.776058
						200.967	281	1.70979				190.869	238	0.963686													126.557	153	0.895686			126.918	160	0.776174
						225.066	302	2.24342				207.508	266	1.65173													138.262	177	1.31329			126.934	160	0.776314
						242.016	378	1.63368				184.557	240	1.1257													130.984	154	1.35281			126.934	160	0.776554
						442.246	652	2.79274				168.426	213	0.835647													125.934	151	0.921328			126.934	160	0.77685
												190.672	241	1.26555													150.623	185	1.65406			126.934	160	0.777001
												195.426	242	1.33339													142.574	188	1.30737			126.951	160	0.777087
												205.131	265	1.25549													129.197	175	0.898858			126.951	160	0.777196
												186.639	236	0.978808													122.115	158	0.870188			126.951	160	0.777319
												185.148	226	0.962708													131.607	169	1.11634			126.967	160	0.777325
												187.623	247	1.62919													121.934	144	0.94092			126.967	161	0.777346
												153.082	194	0.805159													131.918	156	1.584			126.984	161	0.777487
												152.787	202	1.06069													131.066	170	1.3464			126.984	161	0.777663
												155.459	189	0.823364													137.082	172	1.4414			126.984	161	0.777792
												145.803	199	0.52282													138.574	180	1.46609			127	161	0.77794
												175.59	235	1.33934													129.984	167	0.784026			127	161	0.778049
												157.164	211	1.23392													131.639	172	1.01267			127	161	0.778112
												165.115	212	1.12226													150.574	206	1.40383			127.016	161	0.778651
												171.623	216	1.36963													127.098	151	1.24741			127.016	161	0.778654
												159.197	202	1.27708													143.607	190	1.75798			127.033	161	0.778708
												161.328	208	1.38388													131.066	170	1.27559			127.049	161	0.778725
												166.082	210	1.2349													121.361	147	0.935701			127.066	161	0.779046
												169.082	211	1.53264													132.033	164	1.30984			127.066	161	0.779095
												152.623	184	0.924714													134.918	190	1.28025			127.066	161	0.779142
												160.377	225	1.01963													129.721	170	0.94686			127.066	161	0.779207
												167.049	223	1.30506													121.426	144	1.09255			127.098	161	0.779314
												158.246	218	0.791056													129.885	179	1.06058			127.115	161	0.779479
												158.934	205	0.796184													137.082	166	1.402			127.115	161	0.779782
												152.377	198	0.971596													128.951	173	0.836422			127.131	161	0.779965
												147.213	182	0.968472													132.574	163	1.13771			127.131	161	0.779974
												161.721	204	1.35167													135.098	175	0.912317			127.131	161	0.780049
												147.426	198	1.09951													132.934	169	1.16412			127.131	161	0.780126
												148.082	185	0.791651													127.311	156	0.861858			127.148	161	0.780277
												156.705	203	0.77579													138.049	184	1.08847			127.148	161	0.780356
												159.295	197	1.30256													141.295	181	1.05669			127.148	161	0.780664
												145.885	189	0.725925													125.721	169	0.66047			127.164	161	0.780716
												189.393	259	1.75193													123.082	143	1.40628			127.18	161	0.780771
												161.311	215	0.957967													128.443	160	0.941778			127.197	161	0.781141
												148.098	184	0.829877													128.721	150	1.65957			127.197	161	0.781615
												157.639	188	1.00067													128.033	157	0.827607			127.197	161	0.781775
												146.787	185	1.00702													132.443	156	1.23303			127.213	161	0.781887
												169.344	207	1.47678													128.869	163	1.12144			127.213	161	0.782026
												168.852	231	1.21029													138.098	179	1.47479			127.213	161	0.782208
												150.951	193	0.880513													133.852	187	1.11955			127.246	161	0.782373
												147.131	187	0.87293													124.23	176	0.894687			127.246	161	0.782491
												139.902	176	0.640948													128.623	182	1.1958			127.246	161	0.782649
												138.787	176	0.961327													121.557	149	0.973412			127.262	161	0.78314
												172.525	261	1.56137													137	169	1.19442			127.262	161	0.783187
												143.262	191	1.09748													134.77	167	0.986554			127.262	161	0.783946
												157.967	206	1.69879													131.246	183	1.03632			127.279	161	0.784026
												137.557	177	0.910997													130.082	155	1.0451			127.279	161	0.784082
												144.885	182	1.01164													128.066	159	1.28018			127.279	161	0.784391
												147.705	177	1.35521													136.115	190	1.33053			127.295	161	0.784574
												137.721	171	0.838582													124.377	166	0.986887			127.311	161	0.784715
												139.852	176	0.846674													126.361	168	1.00552			127.311	161	0.78542
												165	201	1.43542													125.984	151	1.36469			127.311	161	0.785819
												146.836	178	1.07897													130.344	170	1.15757			127.311	161	0.786073
												137.541	180	0.901968													124.443	159	0.923182			127.328	161	0.786248
												151.426	194	0.873041													126.344	161	0.993568			127.328	161	0.786387
												147.459	189	0.779782													126.311	158	0.803905			127.328	161	0.786586
												157.295	211	1.38692													132.508	199	1.07109			127.328	161	0.786647
												160.426	202	1.94155													131.066	162	1.25341			127.344	161	0.786668
												144.361	176	1.09255													126.541	155	0.810508			127.361	161	0.786743
												142.508	163	0.97134													162.361	228	1.63529			127.361	161	0.786834
												148.361	181	1.09107													151.475	184	1.82604			127.361	161	0.787053
												171	221	1.69939													136.295	169	1.25353			127.361	161	0.787133
												143.508	183	0.633039													140.41	181	1.20084			127.361	161	0.787253
												153.803	192	1.421													143.361	174	1.70535			127.377	161	0.787791
												150	197	1.43287													124.557	150	1.37219			127.377	161	0.787905
												147.328	189	1.49801													139.541	185	1.28271			127.377	161	0.787989
												162.295	208	1.78072													146.033	211	1.31432			127.377	161	0.788057
												148.984	208	1.3196													132.525	151	1.41106			127.377	161	0.788091
												155.443	191	1.42494													128.393	166	1.06048			127.377	161	0.788552
												147.443	205	1.38268													148.279	212	1.39808			127.377	161	0.788717
												147.885	183	1.57009													130.607	172	1.59494			127.426	161	0.78895
												138.902	186	1.02054													125.262	153	1.16323			127.426	161	0.789172
												146.295	183	1.44149													130.541	162	1.18518			127.443	161	0.789567
												165.459	218	1.61276													135.295	175	1.25312			127.443	161	0.790043
												145.148	182	0.95294													125.213	184	0.919248			127.459	161	0.790163
												147.115	213	1.49598													137.803	161	1.33796			127.459	161	0.790198
												139.623	170	0.899115													123.393	147	1.26016			127.475	161	0.790221
												152.115	219	1.48396													150.344	195	1.32481			127.475	161	0.790461
												162.377	217	2.02194													139.754	209	1.17303			127.492	161	0.790529
												142.459	191	0.999632													125.82	156	1.07506			127.492	161	0.790573
												140.623	174	1.14045													151.377	192	1.57033			127.492	161	0.790622
												145.344	184	1.44524													139.426	174	1.56704			127.492	161	0.790665
												137.902	178	1.07901													125.197	160	0.957719			127.525	161	0.790706
												133	167	0.945439													138.885	172	0.956916			127.541	161	0.790752
												131.77	163	1.00262													129.049	178	1.04122			127.557	161	0.791056
												135.164	165	1.05297													131.164	161	1.34748			127.557	161	0.791378
												131.541	188	1.09166													130.623	159	1.34499			127.557	161	0.791503
												134.656	172	1.05002													122.852	153	0.978836			127.574	161	0.791605
												149.311	216	1.42749													134.934	171	1.60193			127.574	161	0.791651
												150.754	203	1.09533													143.869	199	1.44868			127.59	161	0.791803
												164.328	203	1.60604													125.344	156	0.942787			127.607	161	0.792149
												160.066	195	0.883394													122.279	149	1.12521			127.607	161	0.792193
												154.672	194	1.16703													133.541	179	1.20869			127.623	161	0.792388
												149.607	202	1.0218													132.41	173	1.32144			127.623	161	0.792517
												178.836	245	1.81862													127.197	150	1.05781			127.623	161	0.793172
												146.803	177	1.21429													129.082	172	0.989296			127.623	161	0.793265
												156.082	208	0.984256													133.164	173	1.46403			127.623	162	0.793514
												165.754	224	1.53692													132.164	166	1.30872			127.639	162	0.793964
												190.098	242	1.72702													133.131	174	1.30809			127.639	162	0.79423
												164.525	217	0.850711													123.131	158	1.09943			127.656	162	0.794442
												157.738	206	1.25774													127.721	151	1.59372			127.672	162	0.794616
												155.393	189	1.35429													124.311	157	1.14709			127.689	162	0.794701
												154.393	197	1.15677													129.754	165	1.03621			127.689	162	0.795134
												150.016	187	0.78895													121.131	151	1.23287			127.689	162	0.795231
												151.508	188	0.987804																		127.705	162	0.795922
												151.59	199	1.08492																		127.705	162	0.795931
												174.705	247	1.50363																		127.721	162	0.795946
												152.492	189	1.04536																		127.721	162	0.796172
												177.984	237	1.4976																		127.721	162	0.796184
												155.59	190	0.918271																		127.738	162	0.796383
												166.41	207	1.55724																		127.738	162	0.796626
												168.098	208	0.972015																		127.738	162	0.79664
												154.066	188	1.00521																		127.754	162	0.796716
												163.131	210	0.779142																		127.754	162	0.796868
												157.016	204	0.956343																		127.754	162	0.796923
												167.574	231	1.21751																		127.754	162	0.797163
												206.787	294	1.83788																		127.77	162	0.79723
												185.59	235	1.84069																		127.787	162	0.797362
												166.557	206	1.20419																		127.803	162	0.797779
												170.148	223	1.63518																		127.803	162	0.797925
												171.016	219	1.10583																		127.803	162	0.798015
												201.59	276	1.78555																		127.803	162	0.798139
												179.016	236	1.59405																		127.82	162	0.798166
												212.148	272	2.20381																		127.82	162	0.798179
												156.131	194	0.770407																		127.82	162	0.79825
												156.066	198	1.16626																		127.82	162	0.798277
												179.623	239	1.12315																		127.82	162	0.79899
												173.459	216	1.06727																		127.836	162	0.799299
												176.361	218	1.16029																		127.852	162	0.799472
												181.18	239	1.62114																		127.852	162	0.799589
												182.098	214	1.44998																		127.852	162	0.79969
												180.311	264	0.950382																		127.852	162	0.799726
												162.934	206	1.30188																		127.869	162	0.799892
												166.311	204	1.3334																		127.869	162	0.799957
												166.918	205	1.31777																		127.885	162	0.800346
												157.066	189	0.742668																		127.885	162	0.800425
												173.066	220	1.3601																		127.885	162	0.800442
												171.705	219	1.01371																		127.885	162	0.800458
												157.902	195	0.741679																		127.885	162	0.800914
												200.23	266	1.73378																		127.885	162	0.800941
												170.148	209	0.863979																		127.902	162	0.801052
												175.033	214	0.71032																		127.902	162	0.801102
												162.115	204	0.49807																		127.902	162	0.801423
												172.148	249	1.05237																		127.902	162	0.801481
												190.738	235	1.07781																		127.902	162	0.801749
												186.475	252	1.5763																		127.918	162	0.802026
												173.426	220	0.90817																		127.918	162	0.8021
												159.984	192	0.79664																		127.918	162	0.80253
												168.738	221	0.790198																		127.918	162	0.803354
												182.967	243	1.38795																		127.934	162	0.803905
												177.59	230	1.17963																		127.934	162	0.80391
												164.607	205	1.27568																		127.951	162	0.804185
												163.459	216	0.794442																		127.951	162	0.80419
												180.098	237	1.60649																		127.951	162	0.804258
												173.492	241	1.19452																		127.967	162	0.804624
												155.672	208	0.809789																		127.967	162	0.804666
												160.508	197	0.87886																		127.967	162	0.805004
												162.049	195	0.759906																		127.967	162	0.805059
												162.18	194	1.06482																		127.967	162	0.805069
												164.508	209	0.914445																		127.967	162	0.805093
												185.787	224	1.33663																		127.984	162	0.805159
												193.131	253	0.765998																		127.984	162	0.8052
												204.59	256	1.67904																		127.984	162	0.805243
												199.049	243	1.33182																		128	162	0.805674
												181.148	233	1.54774																		128	162	0.805692
												153.656	192	0.956027																		128	162	0.805975
												185.689	239	0.936819																		128	162	0.806286
												171.016	246	1.19154																		128	162	0.806291
												211.803	261	1.67003																		128.016	162	0.806649
												195.213	238	1.44425																		128.016	162	0.806717
												175.967	218	1.25308																		128.033	162	0.807062
												159.77	199	0.917246																		128.033	162	0.807067
												163.311	199	0.918432																		128.033	162	0.807158
												184.148	239	2.05781																		128.033	162	0.807323
												172.475	212	0.913183																		128.033	162	0.807388
												175.557	223	1.30808																		128.049	162	0.807746
												157.951	194	0.566637																		128.066	162	0.808319
												168	213	1.00197																		128.082	162	0.808361
												161.492	208	0.813044																		128.082	162	0.808992
												164.164	205	1.43358																		128.082	162	0.809026
												163.836	210	1.07672																		128.098	162	0.809036
												160.525	207	0.915682																		128.098	162	0.809147
												164.525	197	0.935667																		128.098	162	0.809367
												161.361	208	0.786834																		128.115	162	0.809581
												182.787	253	1.39514																		128.115	162	0.809664
												180.197	225	1.76877																		128.131	162	0.809693
												184.197	248	1.4237																		128.131	162	0.809727
												185.164	237	1.25316																		128.131	162	0.809752
												166.885	211	0.592559																		128.131	162	0.809789
												163.689	210	0.917478																		128.131	162	0.810077
												164.672	224	0.859033																		128.131	162	0.810261
												166.984	212	0.868259																		128.148	162	0.8104
												185.098	258	1.21069																		128.148	162	0.810508
												172.393	220	1.35503																		128.148	162	0.81065
												180.934	224	1.14635																		128.148	162	0.811096
												159.541	194	0.982883																		128.148	162	0.811341
												159.115	207	0.824941																		128.18	162	0.811508
												176.738	236	1.72472																		128.18	163	0.811521
												174.197	228	1.44649																		128.197	163	0.811673
												160.705	187	1.58184																		128.197	163	0.812049
												171.557	225	1.28726																		128.213	163	0.812067
												181.131	231	1.52959																		128.213	163	0.812097
												171.459	237	1.11987																		128.213	163	0.812249
												165.623	206	1.23936																		128.213	163	0.812345
												162.852	202	1.35322																		128.213	163	0.812391
												159.311	199	1.00925																		128.23	163	0.812421
												199.213	279	1.35435																		128.246	163	0.812512
												160.049	211	1.00122																		128.262	163	0.812727
												171.869	215	1.20659																		128.262	163	0.812751
												176.902	217	1.35133																		128.262	163	0.812761
												155.902	200	0.876012																		128.262	163	0.813044
												209.328	270	1.46654																		128.262	163	0.813101
												173.164	237	1.28893																		128.279	163	0.813177
												173.541	225	0.827502																		128.279	163	0.81349
												192.77	243	1.74684																		128.279	163	0.813815
												183.164	248	1.63505																		128.279	163	0.813842
												180.328	227	1.64435																		128.279	163	0.81406
												168.59	214	0.977832																		128.279	163	0.814113
												171.148	219	1.10535																		128.279	163	0.814358
												191.918	241	1.79512																		128.295	163	0.814651
												170.754	225	0.913051																		128.295	163	0.815048
												160.328	205	1.30866																		128.295	163	0.815097
												192.77	250	1.66943																		128.295	163	0.81514
												190.049	245	1.06942																		128.311	163	0.81552
												166	208	1.16267																		128.311	163	0.815609
												158.049	195	1.11311																		128.311	163	0.8157
												176.967	256	1.26676																		128.311	163	0.815825
												155.115	205	0.69771																		128.328	163	0.816026
												201.475	298	1.97873																		128.344	163	0.816542
												185.754	276	1.55879																		128.361	163	0.816677
												168.377	206	0.850296																		128.361	163	0.816904
												169.967	199	1.35824																		128.377	163	0.816904
												159.738	209	1.02458																		128.377	163	0.816906
												180.18	223	1.1835																		128.377	163	0.816936
												153.443	198	0.653509																		128.377	163	0.817254
												165.443	202	0.851125																		128.393	163	0.817277
												182.934	233	0.879985																		128.393	163	0.817517
												167.213	220	1.05813																		128.393	163	0.817609
												165.836	207	0.810077																		128.393	163	0.817668
												193.607	276	1.37055																		128.393	163	0.818
												161.262	206	0.737639																		128.393	163	0.818062
												169.295	201	1.02781																		128.393	163	0.818441
												173.623	213	0.892243																		128.41	163	0.818516
												185.016	254	0.973918																		128.426	163	0.818686
												174.41	237	1.52502																		128.426	163	0.818739
												196.049	258	1.80201																		128.443	163	0.818753
												178.049	248	1.47386																		128.443	163	0.818779
												162.803	214	0.988477																		128.443	163	0.818809
												150.639	203	0.885727																		128.459	163	0.819035
												161.885	207	1.22069																		128.459	163	0.819082
												185.557	243	1.55142																		128.459	163	0.81962
												179	274	1.57844																		128.459	163	0.819643
												175.23	242	1.06348																		128.459	163	0.820055
												155.262	186	1.0726																		128.475	163	0.8201
												155.033	184	0.98438																		128.475	163	0.820146
												170.721	219	0.704093																		128.475	163	0.820452
												170.148	213	0.854738																		128.492	163	0.820475
												180.574	229	1.86251																		128.492	163	0.82049
												160.951	209	0.840267																		128.492	163	0.820763
												166.361	203	0.763238																		128.492	163	0.820829
												194.311	270	1.87779																		128.508	163	0.820849
												144.607	187	1.27693																		128.508	163	0.821009
[truncated: 5,337 more rows]

## Sheet: Fig 1-supplement 4 6-24xMS2-3
2-1 cell mean_intensity	2-max intensity	2-SNR	4-2 cell mean_intensity	4-max intensity	4-SNR	5-1 cell mean_intensity	5-max intensity	5-SNR	6-1 cell mean_intensity	6-max intensity	6-SNR	7-1 cell mean_intensity	7-max intensity	7-SNR	8-1 cell mean_intensity	8-max intensity	8-SNR	9-1 cell mean_intensity	9-max intensity	9-SNR	10-1 cell mean_intensity	10-max intensity	10-SNR	11-1 cell mean_intensity	11-max intensity	11-SNR	12-1 cell mean_intensity	12-max intensity	12-SNR		ALL cells	mean_intensity	max intensity	SNR
[truncated: 4,049 more rows]

[truncated: 21 more sheets: Fig 1-supplement 4 6-MASS-6x-1, Fig 1-supplement 4 6-MASS-6x-2, Fig 1-supplement 4 6-MASS-6x-3, Fig 1-supplement 4 6-MASS-12x-1, Fig 1-supplement 4 6-MASS-12x-2, Fig 1-supplement 4 6-MASS-12x-3, Fig 1-supplement 4 6-MASS-24x-1, Fig 1-supplement 4 6-MASS-24x-2, Fig 1-supplement 4 6-MASS-24x-3, Fig 1-supplement 5-24xMS2-1, Fig 1-supplement 5-24xMS2-2, Fig 1-supplement 5-24xMS2-3, Fig 1-supplement 5-MASS-6x-1, Fig 1-supplement 5-MASS-6x-2, Fig 1-supplement 5-MASS-6x-3, Fig 1-supplement 5-MASS-12x-1, Fig 1-supplement 5-MASS-12x-2, Fig 1-supplement 5-MASS-12x-3, Fig 1-supplement 5-MASS-24x-1, Fig 1-supplement 5-MASS 24x-2 …]
