# Supplementary material for: Enhanced single RNA imaging reveals dynamic gene expression in live animals
Source: eLife. 2023 Mar 3;12:e82178. doi: 10.7554/eLife.82178 (PMC10032653; doi:10.7554/eLife.82178)
Supplement: Figure 2—source data 1. [file elife-82178-fig2-data1.xlsx]

## Sheet: Figure 2C
Unwound	Wound
1	10.7779
1	10.3867
1	9.17898

## Sheet: Figure 2E
Time/minutes	Group1	2	3	4	5	6	7	8	9	10
0	0	0	0	0	0	0	0	0	0	0
	28	0	0	19	0	10	2	0	7	0
	26	0	1	21	0	30	4	0	8	0
0.5	31	1	1	29	0	42	3	0	8	0
	38	0	1	36	0	51	3	0	8	17
	40	2	2	34	0	62	4	0	8	17
1	52	1	2	36	0	77	3	0	8	19
	61	1	8	37	0	81	11	1	19	19
	63	6	11	42	0	90	5	3	19	19
1.5	76	4	15	48	0	84	3	2	21	19
	79	8	24	51	0	85	20	4	23	19
	77	11	27	54	0	85	22	6	28	19
2	71	10	29	62	1	94	26	8	32	36
	83	14	33	59	1	93	21	9	49	48
	83	15	41	56	0	76	20	14	58	58
2.5	77	14	40	61	2	92	21	15	74	63
	88	16	45	63	4	87	29	23	87	72
	84	21	51	63	7	94	20	22	96	84
3	94	21	54	68	3	104	27	25	100	90
	89	24	62	74	8	109	29	26	141	102
	94	29	62	67	10	109	29	29	149	89
3.5	94	40	65	73	15	101	40	30	151	95
	109	43	65	77	15	103	30	32	155	112
	99	34	72	69	15	122	48	33	161	120
4	103	43	75	66	22	116	41	37	171	116
	111	49	79	60	27	118	54	60	174	116
	140	55	86	81	24	117	49	74	176	124
4.5	99	46	90	76	21	125	41	67	186	114
	82	52	84	84	23	149	59	62	199	114
	130	51	92	82	19	144	55	77	198	120
5	108	61	99	73	20	127	80	65	203	116
	109	57	98	73	21	135	58	79	216	117
	111	54	105	74	23	154	88	78	218	106
5.5	107	61	112	76	26	193	69	79	224	119
	113	67	117	81	24	184	93	83	227	118
	111	65	123	76	23	189	97	96	224	113
6	101	60	125	88	28	191	105	89	239	117
	115	60	121	83	28	195	96	87	245	110
	109	68	128	79	35	190	99	96	243	111
6.5	106	73	146	84	33	212	106	91	246	113
	104	73	141	78	33	205	121	97	252	126
	119	76	144	75	28	206	127	95	257	123
7	117	80	153	75	29	202	129	99	247	122
	122	80	161	68	30	218	123	108	260	122
	118	87	170	86	42	214	105	108	267	129
7.5	124	106	174	84	45	224	83	107	266	134
	102	94	169	79	41	217	116	125	272	126
	118	89	182	85	46	225	135	139	271	120
8	105	101	194	83	38	233	102	142	279	132
	118	94	209	78	39	216	107	145	269	127
	129	109	215	77	39	248	124	152	275	125
8.5	117	103	218	71	47	244	134	151	277	137
	145	81	216	78	53	217	118	159	287	131
	135	86	225	65	47	237	111	161	280	125
9	129	112	225	73	49	220	113	165	285	121
	131	111	231	83	49	224	101	160	282	121
	129	112	218	80	46	204	117	166	279	137
9.5	136	109	230	66	54	222	115	167	282	127
	125	114	242	70	53	218	92	166	278	133
	157	106	243	71	54	201	101	161	289	138
10	152	117	248	66	53	203	135	164	276	137
	160	99	249	67	59	214	137	160	282	133
	148	105	254	67	49	206	155	167	285	131
10.5	153	107	255	63	64	186	157	161	284	140
	154	104	268	95	61	210	154	173	297	134
	162	99	243	80	59	195	146	165	296	137
11	160	94	263	94	50	195	143	177	295	140
	160	106	267	80	55	185	152	181	291	140
	162	101	271	97	59	172	147	168	293	137
11.5	162	114	279	89	62	184	153	170	292	138
	152	101	275	81	58	167	144	174	298	142
	166	107	272	76	65	183	179	179	300	147
12	168	94	285	84	65	159	188	182	299	148
	150	104	287	83	64	164	175	187	299	150
	159	104	276	83	59	168	166	192	294	144
12.5	160	106	269	110	64	162	171	193	298	136
	153	101	279	106	69	150	147	199	297	154
	165	108	283	99	61	164	164	201	290	151
13	175	99	286	102	61	163	177	194	303	155
	187	100	287	91	70	137	178	198	303	160
	189	110	291	92	58	158	176	191	309	172
13.5	187	99	281	88	62	149	180	197	308	173
	173	98	290	91	52	151	161	204	304	174
	185	95	277	89	65	149	165	199	309	187
14	194	88	294	86	53	128	194	203	307	192
	194	85	279	101	65	137	170	197	311	188
	191	99	279	106	66	143	112	194	310	193
14.5	236	96	298	108	57	141	132	191	305	191
	240	83	297	99	59	147	162	196	302	188
	196	85	300	112	60	142	139	193	296	202
15	235	92	301	115	67	150	135	196	313	195

## Sheet: Figure 2F
Time/minutes	Group1	2	3	4	5	6	7	8	9	10
0	0	0	0	0	0	0	0	0	0	0
	0	0.318739	0	0	0.317635	0.323748	0.209484	0.49762	0.463447	0
	0	0.317406	0	0	0.31057	0.495144	0.209484	0.513998	0.462106	0
0.5	0	0.302076	0	0	0.320053	0.39562	0.209484	0.486441	0.445165	0
	0	0.318454	0	0.195262	0.30219	0.361836	0.276138	0.508684	0.409515	0
	0	0.313102	0	0.219006	0.318987	0.247572	0.244392	0.496858	0.43319	0.204723
1	0	0.323215	0	0.19044	0.309103	0.304704	0.216626	0.486136	0.433122	0.222422
	0	0.313959	0.502286	0.266616	0.323443	0.23805	0.245458	0.483127	0.408044	0.225245
	0	0.318301	0.465512	0.23805	0.340069	0.361836	0.221729	0.484156	0.434279	0.210406
1.5	0	0.318587	0.457056	0.271377	0.313731	0.393582	0.239954	0.488212	0.435681	0.209016
	0	0.328985	0.4259	0.240431	0.334832	0.399924	0.235155	0.496858	0.467576	0.191777
	0	0.315635	0.395277	0.237193	0.338831	0.280899	0.259684	0.480823	0.458282	0.170223
2	0	0.308399	0.400876	0.258998	0.333937	0.247572	0.255951	0.468749	0.442179	0.165222
	0	0.309217	0.388079	0.248924	0.340031	0.228528	0.273205	0.465264	0.415837	0.16446
	0	0.310817	0.378633	0.317406	0.352428	0.276138	0.260712	0.476309	0.427705	0.161516
2.5	0.228528	0.29722	0.370292	0.29383	0.346753	0.311046	0.271053	0.476405	0.409591	0.157475
	0.228528	0.314988	0.36614	0.315407	0.344963	0.313369	0.28507	0.473453	0.391796	0.156191
	0.242125	0.304704	0.364902	0.272063	0.33984	0.297086	0.288555	0.472558	0.420484	0.165431
3	0.304704	0.306113	0.348943	0.343706	0.353133	0.279318	0.282575	0.471396	0.364137	0.153883
	0.33089	0.292611	0.360084	0.329309	0.349419	0.329195	0.292859	0.462598	0.344506	0.266601
	0.33327	0.299867	0.356275	0.292878	0.346639	0.270425	0.286898	0.461284	0.397273	0.255706
3.5	0.326281	0.299486	0.339993	0.277566	0.349686	0.405371	0.277319	0.452428	0.355551	0.238286
	0.363112	0.29284	0.337498	0.321082	0.350657	0.409446	0.279033	0.449496	0.342586	0.218958
	0.317406	0.302228	0.344792	0.336069	0.349724	0.326129	0.293278	0.45957	0.336942	0.207395
4	0.326338	0.319425	0.351895	0.337041	0.353895	0.326928	0.288479	0.464959	0.365942	0.206001
	0.33645	0.32152	0.353895	0.310531	0.364064	0.322015	0.283756	0.451476	0.345466	0.206612
	0.368978	0.315997	0.334508	0.306437	0.391088	0.38088	0.271758	0.446258	0.338945	0.201025
4.5	0.342792	0.317235	0.342982	0.345687	0.35818	0.283756	0.283394	0.45439	0.325508	0.227617
	0.335346	0.312188	0.339688	0.338393	0.33605	0.331366	0.304095	0.456751	0.310371	0.232762
	0.360827	0.314226	0.329004	0.344277	0.36155	0.33089	0.285908	0.450791	0.292318	0.248173
5	0.339935	0.30419	0.32272	0.311579	0.348791	0.323748	0.288878	0.456085	0.293613	0.226117
	0.345515	0.305485	0.319996	0.295353	0.351	0.38406	0.287107	0.460446	0.29471	0.238695
	0.304704	0.308818	0.31415	0.335746	0.347934	0.452828	0.288593	0.447248	0.281889	0.225024
5.5	0.328871	0.304209	0.315978	0.324681	0.352942	0.442773	0.28566	0.44422	0.327907	0.205754
	0.326129	0.301409	0.328471	0.322034	0.349362	0.365016	0.291849	0.451686	0.286734	0.203521
	0.350238	0.307465	0.326281	0.319939	0.349476	0.335174	0.275548	0.448715	0.304171	0.198576
6	0.326471	0.294535	0.312398	0.35041	0.339021	0.307237	0.28267	0.450105	0.295053	0.230729
	0.339383	0.284289	0.326852	0.349781	0.349419	0.357075	0.291792	0.443878	0.288722	0.227081
	0.349324	0.290726	0.324415	0.353152	0.355551	0.408094	0.28745	0.450676	0.30881	0.21135
6.5	0.352028	0.284308	0.322758	0.337307	0.36256	0.327766	0.28566	0.457818	0.292843	0.222708
	0.332413	0.295906	0.320206	0.348791	0.354504	0.364845	0.28625	0.45877	0.303409	0.215639
	0.385641	0.294801	0.317692	0.340792	0.354466	0.283413	0.286269	0.444715	0.308604	0.215007
7	0.37431	0.285412	0.309636	0.341364	0.354352	0.332204	0.282384	0.454466	0.294321	0.2243
	0.378347	0.295182	0.326338	0.362312	0.35279	0.345649	0.278957	0.45439	0.289324	0.222228
	0.374538	0.281451	0.318301	0.36096	0.35877	0.444944	0.278957	0.461379	0.286574	0.287698
7.5	0.336869	0.289964	0.3259	0.334165	0.372596	0.363302	0.279604	0.460751	0.287382	0.285384
	0.428719	0.28566	0.317463	0.385127	0.369492	0.428033	0.28547	0.457189	0.276054	0.287364
	0.413579	0.289926	0.314093	0.370615	0.354256	0.427538	0.27869	0.461303	0.273845	0.282813
8	0.45856	0.278557	0.309503	0.376538	0.355494	0.419882	0.275091	0.457189	0.28566	0.284298
	0.448258	0.272729	0.320396	0.407827	0.358618	0.365112	0.281756	0.466654	0.28323	0.258998
	0.433613	0.281451	0.319939	0.389964	0.380728	0.48467	0.281261	0.466178	0.286643	0.270996
8.5	0.509732	0.281108	0.317825	0.406209	0.355818	0.447172	0.284251	0.463264	0.276077	0.277243
	0.45778	0.285165	0.321272	0.330337	0.371415	0.44064	0.304361	0.469796	0.320952	0.268359
	0.463531	0.289183	0.331347	0.357627	0.366216	0.420282	0.303885	0.452504	0.293361	0.271996
9	0.474538	0.279928	0.3259	0.403657	0.363759	0.404685	0.30219	0.454161	0.312055	0.275814
	0.51535	0.284746	0.324529	0.381051	0.36155	0.432927	0.288745	0.455304	0.300598	0.261541
	0.498458	0.276138	0.32609	0.387336	0.381318	0.390402	0.283775	0.464655	0.289781	0.272767
9.5	0.475395	0.285374	0.3279	0.362883	0.377947	0.445439	0.276843	0.460827	0.301055	0.283908
	0.486155	0.291925	0.324662	0.355323	0.364121	0.407332	0.301048	0.465207	0.486163	0.257837
	0.526186	0.28646	0.3251	0.379985	0.379661	0.392535	0.276405	0.452904	0.442796	0.274881
10	0.485793	0.281051	0.322777	0.37111	0.383889	0.388307	0.295544	0.459018	0.447427	0.378461
	0.440926	0.292192	0.320968	0.377414	0.381718	0.388307	0.292002	0.461836	0.517479	0.377742
	0.511084	0.292192	0.33786	0.373262	0.380233	0.430394	0.288117	0.452219	0.519993	0.341406
10.5	0.435936	0.287774	0.330699	0.37073	0.373281	0.443897	0.302285	0.456732	0.538869	0.351514
	0.470482	0.289259	0.328166	0.365131	0.371967	0.40438	0.302857	0.457761	0.55044	0.363447
	0.445439	0.291849	0.328452	0.364731	0.387222	0.399924	0.289488	0.467892	0.562095	0.307839
11	0.456675	0.283432	0.325995	0.365683	0.381109	0.422205	0.295106	0.473872	0.594538	0.342487
	0.427633	0.295658	0.326871	0.373872	0.385527	0.431994	0.292287	0.456808	0.595696	0.339973
	0.461893	0.279566	0.331651	0.391811	0.389469	0.413674	0.291773	0.45498	0.545687	0.337178
11.5	0.469035	0.283089	0.324891	0.385222	0.3777	0.392383	0.282556	0.46673	0.534039	0.341493
	0.49842	0.288002	0.325405	0.380499	0.383641	0.424548	0.291335	0.468959	0.531023	0.315723
	0.44681	0.282403	0.328376	0.368425	0.383051	0.39463	0.302723	0.463683	0.630257	0.313598
12	0.48109	0.284308	0.338412	0.39303	0.381223	0.392687	0.283222	0.460522	0.528509	0.350436
	0.489202	0.281756	0.332204	0.378861	0.376309	0.366045	0.292383	0.464731	0.56598	0.311906
	0.50419	0.292763	0.334927	0.385831	0.373339	0.389735	0.289393	0.464293	0.581939	0.326224
12.5	0.483832	0.285489	0.332546	0.374957	0.372424	0.382423	0.28686	0.466007	0.563558	0.446172
	0.461741	0.288364	0.327862	0.391811	0.377776	0.379699	0.284365	0.459608	0.526247	0.447732
	0.464864	0.276805	0.330947	0.385812	0.381794	0.385412	0.29124	0.466254	0.581802	0.465414
13	0.48328	0.277814	0.333841	0.374538	0.390021	0.393354	0.28606	0.475205	0.604434	0.441807
	0.462503	0.277281	0.328414	0.364883	0.383222	0.416378	0.290059	0.46256	0.5569	0.440311
	0.460332	0.284841	0.339002	0.356294	0.377547	0.398001	0.298229	0.458294	0.499204	0.447863
13.5	0.477014	0.28566	0.329975	0.384917	0.377928	0.38785	0.287031	0.470806	0.548536	0.437134
	0.484898	0.289012	0.335555	0.379318	0.371967	0.425443	0.28806	0.475129	0.498374	0.417835
	0.423367	0.281604	0.335212	0.379071	0.388593	0.444544	0.290059	0.474995	0.550554	0.416332
14	0.488326	0.278576	0.325081	0.407066	0.38107	0.430071	0.294992	0.473129	0.523299	0.412002
	0.549058	0.284898	0.329195	0.385355	0.378138	0.429747	0.290764	0.479737	0.486201	0.39188
	0.512455	0.281527	0.328376	0.367416	0.383565	0.451667	0.289678	0.475034	0.465199	0.408008
14.5	0.555285	0.279318	0.329785	0.373339	0.407104	0.433441	0.287736	0.463817	0.5036	0.41271
	0.48547	0.282765	0.321545	0.370558	0.403885	0.441002	0.288745	0.46713	0.506037	0.428844
	0.498629	0.295321	0.332594	0.371472	0.383203	0.465911	0.282975	0.477757	0.467149	0.408911
15	0.443706	0.291254	0.330125	0.387088	0.395791	0.445763	0.284803	0.472444	0.471326	0.431272

## Sheet: Fig 2-supplement 2B
Unwound	Wound
1	7.48153
1	8.51496
1	8.68384

## Sheet: Fig 2-supplement 2C
C42D4.3 Unwound			C42D4.3-8XMS2 Unwound			C42D4.3 + MCP-24xSuntag + ScFv-sfGFP Unwound			C42D4.3-8xMS2 + MCP-24xSuntag + ScFv-sfGFP Unwound
1	1	1	0.87256	1.49485	1.26868	1.30435	1.45734	0.87055	0.94825	1.20581	0.95264
C42D4.3 Wound			C42D4.3-8XMS2 Wound			C42D4.3 + MCP-24xSuntag + ScFv-sfGFP Wound			C42D4.3-8xMS2 + MCP-24xSuntag + ScFv-sfGFP Wound
9.40438	10.7034	9.35022	8.83563	13.6422	11.6587	10.3627	12.996	9.57983	7.06162	10.4831	8.31087

## Sheet: Fig 2-supplement 2D
C42D4.3 Act D 0 h			C42D4.3-8XMS2 Act D 0 h			C42D4.3 + MCP-24xSuntag + ScFv-sfGFP Act D 0 h			C42D4.3-8xMS2 + MCP-24xSuntag + ScFv-sfGFP Act D 0 h
1	1	1	1.02337	1.217	0.993092	0.928731	1.15402	1.01396	0.933033	0.835088	0.897095
C42D4.3 Act D 3 h			C42D4.3-8XMS2 Act D 3 h			C42D4.3 + MCP-24xSuntag + ScFv-sfGFP Act D 3 h			C42D4.3-8xMS2 + MCP-24xSuntag + ScFv-sfGFP Act D 3 h
0.614152	0.523647	0.456916	0.668964	0.622725	0.469761	0.526072	0.431271	0.302149	0.687771	0.561231	0.604299
C42D4.3 Act D 6 h			C42D4.3-8XMS2 Act D 6 h			C42D4.3 + MCP-24xSuntag + ScFv-sfGFP Act D 6 h			C42D4.3-8xMS2 + MCP-24xSuntag + ScFv-sfGFP Act D 6 h
0.530957	0.5	0.404254	0.432269	0.411796	0.48858	0.384219	0.423373	0.344681	0.562529	0.387786	0.33064

## Sheet: Fig 2-supplement 5B
time(sec)	size
1	0.212417	0.145744	0.120872	0.129671	0.104932
2	0.194992	0.14163	0.106646	0.128985	0.108951
3	0.195011	0.135403	0.131346	0.130451	0.0965531
4	0.2016	0.137022	0.120053	0.125271	0.107999
5	0.200933	0.134793	0.118777	0.12868	0.101733
6	0.195125	0.125329	0.114931	0.127442	0.101962
7	0.19901	0.139231	0.114816	0.122434	0.104742
8	0.201866	0.126871	0.116302	0.128871	0.102438
9	0.201676	0.125786	0.122148	0.123119	0.0938679
10	0.206494	0.133955	0.117025	0.13068	0.0962484
11	0.190973	0.130032	0.120644	0.123729	0.104475
12	0.203409	0.125424	0.112836	0.126738	0.104932
13	0.200514	0.121958	0.119577	0.121405	0.104666
14	0.199257	0.131823	0.125252	0.124814	0.108875
15	0.210436	0.128966	0.11116	0.123557	0.100457
16	0.198267	0.139078	0.12192	0.125671	0.0988193
17	0.209027	0.137917	0.114378	0.123786	0.102152
18	0.201105	0.13228	0.112055	0.119406	0.095639
19	0.206513	0.124986	0.120891	0.133556	0.0987431
20	0.204437	0.128966	0.122796	0.124491	0.107522
21	0.206266	0.13546	0.120491	0.128071	0.103676
22	0.204056	0.127919	0.122262	0.131727	0.109179
23	0.208284	0.120967	0.126071	0.130261	0.110455
24	0.206418	0.116302	0.124015	0.124186	0.104742
25	0.200038	0.124433	0.115292	0.123577	0.0989717
26	0.225652	0.128947	0.120396	0.130623	0.0976576
27	0.202933	0.124015	0.120987	0.12929	0.101676
28	0.197124	0.121615	0.118644	0.127385	0.0943249
29	0.200552	0.118397	0.124814	0.124586	0.10796
30	0.204494	0.112531	0.115445	0.129899	0.100628
31	0.207084	0.127671	0.112588	0.124395	0.103352
32	0.205999	0.12072	0.13167	0.120682	0.094801
33	0.205866	0.127271	0.111141	0.124072	0.0916016
34	0.21514	0.126319	0.113826	0.126166	0.106246
35	0.206475	0.131823	0.111484	0.124529	0.109065
36	0.201657	0.125576	0.112817	0.127957	0.0927633
37	0.213655	0.124872	0.118777	0.13047	0.101524
38	0.198876	0.130394	0.122434	0.129252	0.097372
39	0.204514	0.140659	0.120987	0.121596	0.0907447
40	0.213007	0.134317	0.115464	0.125843	0.0964959
41	0.207294	0.136526	0.120358	0.129271	0.0926681
42	0.210112	0.132984	0.107846	0.1271	0.101771
43	0.18646	0.128737	0.126814	0.126071	0.101028
44	0.194839	0.13466	0.130109	0.129156	0.0971434
45	0.201524	0.131023	0.117559	0.121767	0.100457
46	0.214664	0.137821	0.122986	0.131175	0.108684
47	0.208284	0.125062	0.121786	0.131594	0.0945154
48	0.205713	0.126566	0.114816	0.128376	0.109503
49	0.208627	0.130337	0.11196	0.132984	0.107408
50	0.199714	0.132413	0.107389	0.125214	0.110741
51	0.212817	0.136888	0.12112	0.12948	0.101885
52	0.190288	0.120472	0.128299	0.118796	0.097829
53	0.197467	0.122643	0.123615	0.122948	0.111407
54	0.212074	0.130261	0.108913	0.121996	0.104247
55	0.214283	0.132661	0.121501	0.126585	0.101143
56	0.198857	0.129861	0.0998477	0.130356	0.104533
57	0.208322	0.124948	0.126795	0.118682	0.101257
58	0.209655	0.127842	0.128966	0.124795	0.100933
59	0.209636	0.13506	0.119577	0.121444	0.105847
60	0.203714	0.124243	0.117121	0.121272	0.0996382
61	0.207732	0.146505	0.123557	0.131099	0.10796
62	0.192154	0.133994	0.119692	0.122453	0.108018
63	0.201257	0.124872	0.113064	0.122434	0.0961151
64	0.207084	0.138107	0.123158	0.127957	0.0999429
65	0.208951	0.137802	0.119196	0.131346	0.107713
66	0.206361	0.140259	0.106761	0.129556	0.105142
67	0.195906	0.136584	0.115369	0.132737	0.10179
68	0.207332	0.118358	0.107161	0.117197	0.0962103
69	0.212055	0.134451	0.103847	0.132413	0.0945535
70	0.209179	0.136241	0.118796	0.131575	0.0964579
71	0.19722	0.136146	0.118911	0.125138	0.103333
72	0.198343	0.132394	0.12649	0.123119	0.101428
73	0.222548	0.133765	0.118473	0.120396	0.108932
74	0.204456	0.133308	0.113007	0.12192	0.0967626
75	0.206951	0.124091	0.135022	0.125157	0.108189
76	0.225595	0.137669	0.122662	0.125386	0.105866
77	0.208189	0.136926	0.128699	0.125881	0.105123
78	0.202552	0.119273	0.106665	0.124453	0.100019
79	0.196191	0.130185	0.133441	0.123843	0.0967435
80	0.193658	0.137345	0.123043	0.126928	0.0993335
81	0.199238	0.126452	0.120568	0.122434	0.104114
82	0.201581	0.142621	0.103428	0.117501	0.101524
83	0.200286	0.134051	0.116359	0.125881	0.103047
84	0.212341	0.141535	0.111312	0.128604	0.110836
85	0.198267	0.135746	0.119958	0.128242	0.101885
86	0.216968	0.138926	0.121329	0.125252	0.0982861
87	0.22053	0.130947	0.117063	0.117463	0.11015
88	0.201333	0.131137	0.119349	0.123976	0.103961
89	0.21076	0.128585	0.117768	0.124224	0.105389
90	0.21175	0.121444	0.110684	0.1243	0.098686
91	0.205885	0.125919	0.113293	0.12411	0.0970863
92	0.20438	0.125843	0.112112	0.12689	0.109065
93	0.200114	0.127214	0.099981	0.135022	0.110608
94	0.202495	0.141859	0.11853	0.131651	0.102076
95	0.208779	0.147953	0.108703	0.125138	0.102476
96	0.21394	0.136393	0.112645	0.1235	0.116435
97	0.198458	0.139174	0.108875	0.127728	0.0957151
98	0.209808	0.135917	0.115007	0.125386	0.0966864
99	0.207656	0.119273	0.117749	0.12849	0.104133
100	0.218816	0.131842	0.112512	0.125976	0.111731
101	0.196991	0.12451	0.123786	0.130737	0.1028
102	0.208189	0.136584	0.101962	0.130661	0.102438
103	0.192973	0.125043	0.113921	0.134965	0.0956961
104	0.19981	0.129937	0.10518	0.129042	0.10379
105	0.205351	0.133822	0.116321	0.124643	0.103637
106	0.21394	0.13386	0.110589	0.137079	0.0978671
107	0.209655	0.139478	0.117673	0.131385	0.103599
108	0.22689	0.138869	0.117635	0.126071	0.0999429
109	0.212398	0.140145	0.126166	0.136279	0.108741
110	0.209484	0.13346	0.120149	0.123424	0.0957342
111	0.204399	0.132261	0.110455	0.131518	0.101333
112	0.198096	0.128357	0.114873	0.122396	0.0978481
113	0.202	0.123139	0.110189	0.125405	0.102971
114	0.195163	0.127176	0.123729	0.118606	0.0946296
115	0.198362	0.131765	0.116054	0.127576	0.110665
116	0.210055	0.141097	0.112245	0.124872	0.0950867
117	0.200305	0.137574	0.124167	0.124814	0.0947439
118	0.235308	0.13466	0.125195	0.124757	0.105009
119	0.208322	0.124072	0.106951	0.12828	0.110455
120	0.216625	0.128756	0.120091	0.128395	0.108018
121	0.22051	0.131118	0.11394	0.118739	0.098229
122	0.207142	0.14283	0.115483	0.131499	0.114626
123	0.214873	0.140183	0.116702	0.130928	0.1012
124	0.203695	0.136736	0.119463	0.128338	0.106151
125	0.197105	0.136831	0.118416	0.126719	0.120853
126	0.201962	0.136336	0.111807	0.127404	0.109884
127	0.215369	0.136812	0.115597	0.128166	0.105028
128	0.208703	0.12988	0.119844	0.127861	0.113217
129	0.203085	0.151057	0.117178	0.133251	0.102742
130	0.20718	0.129442	0.10857	0.123881	0.109465
131	0.222072	0.134812	0.112455	0.118777	0.0984575
132	0.209141	0.134336	0.126376	0.129175	0.102914
133	0.206742	0.14064	0.11674	0.118054	0.105466
134	0.218835	0.135841	0.110246	0.128357	0.0975815
135	0.224795	0.140011	0.114035	0.125214	0.098667
136	0.209827	0.13287	0.114969	0.124129	0.102152
137	0.212474	0.129309	0.11156	0.128261	0.105732
138	0.211446	0.152809	0.111007	0.127157	0.10299
139	0.222872	0.133175	0.121805	0.132661	0.101124
140	0.198362	0.14641	0.122205	0.128833	0.109579
141	0.214664	0.128147	0.119768	0.117482	0.101276
142	0.199353	0.130223	0.119539	0.128509	0.112988
143	0.212112	0.146601	0.109503	0.125252	0.106646
144	0.200133	0.127576	0.118054	0.12809	0.0977148
145	0.208951	0.130413	0.115864	0.132394	0.105104
146	0.214074	0.132242	0.115197	0.119844	0.0932966
147	0.194649	0.156942	0.130528	0.127004	0.112302
148	0.229785	0.142906	0.125195	0.126566	0.101162
149	0.197601	0.144906	0.131842	0.129461	0.0937346
150	0.216721	0.14382	0.122148	0.117044	0.111636
151	0.18905	0.146525	0.120606	0.1271	0.100343
152	0.19103	0.133308	0.128833	0.118454	0.101466
153	0.201238	0.14243	0.131042	0.120549	0.101276
154	0.190973	0.139897	0.11773	0.12211	0.110265
155	0.20259	0.142601	0.120072	0.125424	0.102152
156	0.217311	0.121272	0.12609	0.125062	0.0947629
157	0.210036	0.13685	0.116721	0.13306	0.103656
158	0.210055	0.135365	0.121729	0.123177	0.0901162
159	0.205256	0.14043	0.122605	0.129594	0.0971815
160	0.213674	0.128718	0.123024	0.122758	0.0972577
161	0.214759	0.132394	0.123729	0.118282	0.113807
162	0.194554	0.12988	0.117959	0.127519	0.110074
163	0.206589	0.135936	0.125767	0.118454	0.0996001
164	0.216092	0.133994	0.124319	0.119977	0.109084
165	0.206189	0.135898	0.138317	0.126547	0.0976957
166	0.200781	0.133803	0.120377	0.120358	0.109103
167	0.212093	0.12908	0.107446	0.11792	0.107294
168	0.197734	0.137993	0.116549	0.125367	0.0960008
169	0.204266	0.129633	0.11733	0.122053	0.100686
170	0.209275	0.144658	0.115959	0.120225	0.101505
171	0.196248	0.141897	0.120853	0.114321	0.1004
172	0.223215	0.120549	0.115502	0.126414	0.0903066
173	0.213445	0.13864	0.118092	0.123976	0.0939821
174	0.210265	0.141421	0.114493	0.126624	0.106513
175	0.210055	0.128947	0.118168	0.123081	0.0972577
176	0.218149	0.135669	0.115559	0.121691	0.103809
177	0.192954	0.132756	0.118663	0.127538	0.106075
178	0.208208	0.131975	0.121196	0.112912	0.103828
179	0.193677	0.146944	0.126585	0.121615	0.102761
180	0.18924	0.136774	0.121558	0.127461	0.0987812
181	0.196287	0.146715	0.119273	0.123158	0.105675
182	0.173491	0.130832	0.11415	0.127557	0.0959056
183	0.204152	0.145896	0.127062	0.122853	0.104932
184	0.192154	0.144144	0.123843	0.13028	0.101638
185	0.199962	0.139307	0.106266	0.11893	0.0946106
186	0.210303	0.142925	0.124605	0.124015	0.0981909
187	0.206894	0.136088	0.116778	0.119063	0.0956961
188	0.205142	0.147343	0.1259	0.123862	0.093906
189	0.202	0.147667	0.115026	0.126985	0.0992383
190	0.198934	0.123881	0.117559	0.124719	0.103466
191	0.215292	0.142925	0.121558	0.128623	0.0971244
192	0.199791	0.131594	0.128756	0.115864	0.1008
193	0.216645	0.15119	0.120777	0.12868	0.114683
194	0.193201	0.146467	0.114531	0.1243	0.111541
195	0.207408	0.124872	0.12569	0.118282	0.099543
196	0.199867	0.116797	0.119158	0.120587	0.098229
197	0.19661	0.150219	0.108836	0.1251	0.100876
198	0.189126	0.145249	0.115845	0.118035	0.0963817
199	0.198134	0.132413	0.111979	0.125843	0.102228
200	0.199695	0.13925	0.13466	0.132318	0.0962293
201	0.203733	0.14363	0.11733	0.124491	0.103961
202	0.19901	0.1279	0.122415	0.12491	0.110493
203	0.21236	0.135022	0.122548	0.127557	0.104228
204	0.202647	0.135536	0.127271	0.121805	0.107732
205	0.214112	0.147096	0.108989	0.125557	0.089602
206	0.194992	0.152523	0.123367	0.122891	0.0954295
207	0.207237	0.143573	0.116644	0.129004	0.110074
208	0.199772	0.150219	0.113712	0.120701	0.102285
209	0.191297	0.126776	0.115902	0.128223	0.110569
210	0.214435	0.14921	0.111941	0.122548	0.0964388
211	0.198191	0.121615	0.109236	0.125633	0.11813
212	0.195906	0.143973	0.111084	0.118568	0.0965721
213	0.192706	0.134451	0.117768	0.12291	0.102171
214	0.212779	0.135765	0.120015	0.124852	0.0986289
215	0.212721	0.133308	0.115768	0.119558	0.107027
216	0.189469	0.123995	0.107142	0.119368	0.107979
217	0.194744	0.14702	0.114264	0.122529	0.0973529
218	0.191202	0.144011	0.102133	0.126757	0.0957913
219	0.18686	0.14243	0.117787	0.115654	0.0913731
220	0.204037	0.129194	0.113769	0.112855	0.107846
221	0.19861	0.134432	0.107865	0.12272	0.0915826
222	0.202114	0.127023	0.122872	0.116606	0.0947629
223	0.195334	0.122186	0.110931	0.125652	0.096934
224	0.206742	0.130813	0.113655	0.124795	0.0945344
225	0.184365	0.134736	0.128433	0.115292	0.0993145
226	0.202152	0.124872	0.113997	0.121291	0.0906875
227	0.205466	0.128795	0.112226	0.116454	0.116892
228	0.188993	0.14483	0.122815	0.11215	0.0984575
229	0.198096	0.138012	0.118092	0.12649	0.107694
230	0.194401	0.122243	0.118168	0.122796	0.100095
231	0.185774	0.122529	0.108722	0.120948	0.0938679
232	0.182899	0.11733	0.118816	0.123443	0.099981
233	0.190611	0.126719	0.109865	0.127442	0.0962865
234	0.186707	0.131784	0.107237	0.120015	0.103104
235	0.213902	0.142468	0.109808	0.121405	0.105275
236	0.192763	0.129575	0.110684	0.123158	0.0990288
237	0.199867	0.146467	0.115407	0.125081	0.0980766
238	0.200724	0.131994	0.121082	0.119634	0.093468
239	0.202781	0.131765	0.109008	0.109294	0.0878119
240	0.19781	0.138869	0.128737	0.136279	0.110798
241	0.215826	0.134603	0.120929	0.120015	0.10857
242	0.202895	0.123995	0.126757	0.123234	0.100533
243	0.20358	0.139821	0.116359	0.116073	0.0925538
244	0.20499	0.135212	0.133594	0.123081	0.108246
245	0.20857	0.133517	0.114626	0.119825	0.0984003
246	0.196667	0.131689	0.118987	0.124757	0.0984003
247	0.186955	0.149305	0.11594	0.120948	0.119711
248	0.196553	0.137688	0.12828	0.126433	0.113788
249	0.199372	0.142601	0.11733	0.123557	0.11335
250	0.19204	0.13268	0.114512	0.131366	0.108322
251	0.196782	0.137307	0.107922	0.125919	0.107218
252	0.184841	0.141383	0.109751	0.123786	0.0959246
253	0.184632	0.131784	0.117216	0.118187	0.107008
254	0.19044	0.154675	0.127385	0.117711	0.103314
255	0.193163	0.141497	0.107675	0.117844	0.107827
256	0.199181	0.12411	0.118282	0.119577	0.0919063
257	0.196096	0.115483	0.114016	0.121044	0.0959627
258	0.211674	0.129309	0.113655	0.123272	0.107122
259	0.195296	0.119292	0.124205	0.126509	0.102838
260	0.197163	0.132451	0.119025	0.121501	0.111541
261	0.200952	0.13904	0.117768	0.122624	0.0966673
262	0.194458	0.114264	0.118092	0.127919	0.0959246
263	0.194554	0.121101	0.126224	0.12171	0.103238
264	0.196782	0.108322	0.114645	0.133384	0.0974101
265	0.199105	0.130566	0.109884	0.128318	0.0988384
266	0.196534	0.123158	0.108056	0.128833	0.100171
267	0.192859	0.127538	0.115254	0.123557	0.100152
268	0.191126	0.138716	0.112379	0.123957	0.110817
269	0.199772	0.147362	0.111198	0.117939	0.0871073
270	0.199257	0.132127	0.116321	0.124281	0.106304
271	0.197867	0.124681	0.11952	0.119139	0.1008
272	0.206399	0.133308	0.13944	0.123253	0.111579
273	0.19941	0.146334	0.124167	0.116664	0.101733
274	0.21156	0.139402	0.116721	0.119977	0.102419
275	0.194706	0.13765	0.119844	0.124433	0.109941
276	0.194953	0.127766	0.113845	0.128585	0.112645
277	0.189088	0.119482	0.112245	0.123367	0.0919635
278	0.19581	0.143687	0.119939	0.118263	0.096515
279	0.203333	0.135193	0.119806	0.12491	0.102342
280	0.216264	0.130051	0.123843	0.124072	0.0925729
281	0.191792	0.132775	0.115521	0.117882	0.0877738
282	0.190231	0.14283	0.122872	0.116149	0.0996953
283	0.201752	0.118035	0.119901	0.131423	0.114835
284	0.206494	0.113978	0.113731	0.117711	0.110093
285	0.195296	0.138202	0.121158	0.115978	0.0933156
286	0.194972	0.123272	0.106246	0.120358	0.101485
287	0.190821	0.116378	0.129861	0.121405	0.0982099
288	0.204723	0.128242	0.122662	0.118301	0.112626
289	0.191049	0.150924	0.10996	0.120149	0.0931061
290	0.18804	0.133041	0.122377	0.127157	0.0989907
291	0.19741	0.13028	0.126471	0.123062	0.105732
292	0.195601	0.123519	0.109274	0.124757	0.109579
293	0.199638	0.138469	0.128338	0.121386	0.107656
294	0.193906	0.111141	0.113388	0.124186	0.101943
295	0.181699	0.120987	0.109732	0.124262	0.100171
296	0.191259	0.135422	0.120529	0.124738	0.110227
297	0.191506	0.121977	0.11573	0.115826	0.101752
298	0.189259	0.128795	0.121558	0.12788	0.103085
299	0.192554	0.134374	0.11135	0.118587	0.110227
300	0.187888	0.144125	0.119025	0.134317	0.102495

## Sheet: Fig 2-supplement 5C
BFP-MS2 1min	BFP-MS2 2min	BFP-MS2 3min	BFP-MS2 4min	BFP-MS2 5min	C42D4.3-MS21min	C42D4.3-MS2 2min	C42D4.3-MS2 3min	C42D4.3-MS2 4min	C42D4.3-MS2 5min
0.19	0.267	0.114	0.095	0.419	0.171	0.095	0.133	0.133	0.114
0.152	0.171	0.114	0.133	0.209	0.114	0.095	0.171	0.152	0.133
0.248	0.19	0.095	0.095	0.095	0.114	0.095	0.171	0.095	0.438
0.114	0.19	0.095	0.095	0.229	0.095	0.095	0.114	0.495	0.095
0.171	0.19	0.133	0.171	0.114	0.209	0.095	0.133	0.209	0.152
0.152	0.133	0.209	0.19	0.267	0.133	0.095	0.495	0.495	0.628
0.095	0.171	0.095	0.133	0.095	0.152	0.095	0.152	0.171	0.628
0.343	0.171	0.095	0.286	0.114	0.209	0.095	0.171	0.133	0.286
0.114	0.343	0.114	0.095	0.095	0.171	0.095	0.495	0.286	0.248
0.095	0.305	0.171	0.229	0.095	0.114	0.095	0.114	0.114	0.495
0.095	0.114	0.171	0.114	0.19	0.133	0.095	0.209	0.095	0.152
0.248	0.248	0.171	0.305	0.209	0.229	0.095	0.152	0.152	0.362
0.267	0.152	0.267	0.095	0.552	0.133	0.095	0.495	0.114	0.133
0.095	0.095	0.152	0.419	0.19	0.209	0.095	0.114	0.362	0.152
0.152	0.267	0.171	0.152	0.114	0.133	0.095	0.152	0.095	0.171
0.229	0.248	0.133	0.171	0.19	0.133	0.095	0.171	0.628	0.152
0.324	0.133	0.209	0.114	0.133	0.152	0.095	0.533	0.457	0.305
0.133	0.514	0.095	0.19	0.305	0.133	0.095	0.495	0.209	0.267
0.419	0.229	0.362	0.209	0.19	0.152	0.095	0.152	0.19	0.628
0.095	0.19	0.095	0.267	0.133	0.152	0.095	0.114	0.209	0.628
0.419	0.419	0.133	0.343	0.114	0.152	0.095	0.095	0.229	0.628
0.19	0.209	0.152	0.095	0.171	0.133	0.095	0.533	0.248	0.133
0.19	0.305	0.095	0.114	0.114	0.305	0.095	0.171	0.533	0.114
0.209	0.248	0.152	0.114	0.133	0.19	0.095	0.209	0.133	0.095
0.152	0.19	0.114	0.114	0.19	0.095	0.114	0.171	0.495	0.114
0.114	0.152	0.552	0.095	0.324	0.229	0.114	0.533	0.114	0.4
0.305	0.133	0.381	0.171	0.114	0.095	0.114	0.114	0.114	0.324
0.171	0.248	0.133	0.286	0.114	0.114	0.114	0.533	0.305	0.114
0.571	0.114	0.19	0.095	0.209	0.114	0.114	0.114	0.114	0.152
0.19	0.286	0.114	0.114	0.324	0.152	0.114	0.628	0.628	0.114
0.095	0.114	0.229	0.209	0.152	0.114	0.114	0.133	0.628	0.133
0.095	0.19	0.229	0.171	0.114	0.133	0.114	0.114	0.114	0.628
0.095	0.152	0.267	0.248	0.267	0.209	0.114	0.209	0.495	0.209
0.152	0.133	0.171	0.114	0.19	0.114	0.114	0.114	0.114	0.229
0.419	0.229	0.114	0.133	0.114	0.095	0.114	0.133	0.248	0.114
0.095	0.095	0.095	0.095	0.095	0.152	0.114	0.095	0.152	0.248
0.229	0.267	0.133	0.114	0.114	0.095	0.114	0.229	0.133	0.171
0.095	0.19	0.209	0.152	0.095	0.248	0.114	0.209	0.267	0.209
0.171	0.305	0.133	0.248	0.248	0.133	0.114	0.457	0.114	0.133
0.286	0.152	0.248	0.171	0.248	0.114	0.114	0.114	0.114	0.095
0.267	0.152	0.552	0.133	0.229	0.095	0.114	0.457	0.628	0.686
0.133	0.419	0.095	0.152	0.133	0.095	0.114	0.286	0.628	0.628
0.114	0.229	0.114	0.095	0.267	0.19	0.114	0.152	0.095	0.628
0.248	0.133	0.267	0.229	0.171	0.095	0.133	0.114	0.628	0.114
0.324	0.286	0.114	0.286	0.095	0.133	0.133	0.133	0.095	0.686
0.114	0.133	0.114	0.209	0.267	0.095	0.133	0.495	0.114	0.152
0.095	0.114	0.133	0.133	0.133	0.095	0.133	0.495	0.628	0.209
0.324	0.324	0.114	0.133	0.114	0.133	0.133	0.133	0.114	0.114
0.324	0.19	0.114	0.248	0.133	0.133	0.133	0.171	0.133	0.114
0.095	0.229	0.114	0.133	0.095	0.133	0.133	0.19	0.095	0.286
0.171	0.286	0.267	0.133	0.362	0.114	0.133	0.209	0.229	0.628
0.133	0.114	0.152	0.209	0.171	0.171	0.133	0.267	0.114	0.495
0.114	0.286	0.133	0.286	0.171	0.19	0.133	0.114	0.533	0.133
0.209	0.095	0.171	0.229	0.19	0.095	0.133	0.248	0.114	0.095
0.248	0.171	0.114	0.171	0.133	0.133	0.133	0.171	0.133	0.095
0.114	0.133	0.305	0.095	0.114	0.229	0.133	0.171	0.095	0.095
0.171	0.286	0.209	0.305	0.095	0.152	0.133	0.267	0.095	0.114
0.114	0.095	0.095	0.095	0.095	0.19	0.133	0.171	0.133	0.114
0.095	0.209	0.114	0.514	0.171	0.133	0.133	0.457	0.114	0.267
0.267	0.095	0.095	0.114	0.152	0.419	0.133	0.381	0.133	0.686
0.114	0.19	0.133	0.095	0.381	0.114	0.133	0.171	0.114	0.133
0.114	0.381	0.095	0.095	0.095	0.419	0.133	0.114	0.133	0.114
0.095	0.095	0.114	0.133	0.114	0.114	0.133	0.495	0.495	0.114
0.171	0.095	0.229	0.171	0.095	0.095	0.133	0.286	0.114	0.19
0.229	0.171	0.095	0.19	0.114	0.19	0.133	0.209	0.095	0.114
0.114	0.114	0.114	0.133	0.171	0.114	0.133	0.114	0.152	0.209
0.152	0.152	0.343	0.095	0.209	0.095	0.133	0.209	0.114	0.133
0.267	0.095	0.133	0.171	0.095	0.114	0.133	0.229	0.114	0.495
0.305	0.305	0.095	0.095	0.133	0.095	0.133	0.152	0.114	0.209
0.171	0.209	0.229	0.114	0.171	0.171	0.133	0.171	0.495	0.171
0.305	0.133	0.095	0.248	0.152	0.095	0.133	0.171	0.152	0.133
0.114	0.171	0.286	0.152	0.19	0.229	0.133	0.114	0.628	0.171
0.419	0.171	0.152	0.114	0.19	0.114	0.133	0.533	0.095	0.114
0.267	0.095	0.095	0.095	0.209	0.152	0.152	0.209	0.514	0.628
0.133	0.133	0.114	0.133	0.095	0.095	0.152	0.114	0.114	0.171
0.114	0.209	0.267	0.114	0.133	0.114	0.152	0.171	0.095	0.114
0.19	0.095	0.114	0.133	0.152	0.229	0.152	0.152	0.229	0.114
0.114	0.114	0.095	0.133	0.114	0.133	0.152	0.628	0.114	0.095
0.095	0.171	0.133	0.152	0.248	0.095	0.152	0.248	0.133	0.133
0.19	0.095	0.114	0.171	0.248	0.095	0.152	0.362	0.095	0.248
0.209	0.095	0.133	0.133	0.095	0.133	0.152	0.19	0.114	0.133
0.4	0.286	0.19	0.4	0.171	0.095	0.152	0.171	0.533	0.114
0.152	0.114	0.095	0.095	0.114	0.095	0.152	0.286	0.838	0.133
0.114	0.114	0.114	0.4	0.095	0.381	0.152	0.533	0.095	0.152
0.267	0.133	0.095	0.152	0.286	0.171	0.152	0.533	0.248	0.114
0.305	0.114	0.152	0.095	0.229	0.171	0.152	0.133	0.152	0.114
0.133	0.114	0.114	0.114	0.495	0.095	0.152	0.152	0.267	0.267
0.286	0.267	0.552	0.114	0.095	0.133	0.152	0.114	0.152	0.628
0.209	0.133	0.209	0.114	0.152	0.133	0.152	0.152	0.095	0.267
0.133	0.171	0.19	0.171	0.114	0.114	0.152	0.171	0.171	0.114
0.305	0.152	0.229	0.095	0.152	0.095	0.152	0.209	0.628	0.133
0.324	0.19	0.248	0.114	0.133	0.171	0.152	0.114	0.229	0.324
0.114	0.362	0.267	0.095	0.114	0.095	0.152	0.171	0.095	0.114
0.095	0.229	0.114	0.133	0.114	0.171	0.152	0.229	0.324	0.286
0.095	0.362	0.095	0.209	0.095	0.095	0.152	0.133	0.229	0.19
0.152	0.095	0.133	0.095	0.095	0.248	0.152	0.114	0.362	0.114
0.133	0.152	0.095	0.095	0.209	0.095	0.152	0.229	0.438	0.152
0.114	0.095	0.095	0.114	0.114	0.095	0.152	0.229	0.305	0.628
0.152	0.152	0.114	0.229	0.209	0.19	0.152	0.114	0.095	0.209
0.19	0.171	0.095	0.095	0.267	0.229	0.152	0.267	0.152	0.628
0.171	0.095	0.209	0.229	0.152	0.209	0.171	0.133	0.171	0.628
0.133	0.152	0.095	0.095	0.114	0.095	0.171	0.133	0.133	0.628
0.152	0.133	0.095	0.152	0.095	0.133	0.171	0.457	0.628	0.133
0.171	0.133	0.381	0.267	0.095	0.095	0.171	0.171	0.152	0.229
0.324	0.095	0.133	0.133	0.095	0.209	0.171	0.628	0.133	0.133
0.209	0.171	0.248	0.476	0.267	0.114	0.171	0.533	0.171	0.133
0.248	0.209	0.095	0.171	0.19	0.114	0.171	0.152	0.133	0.362
0.209	0.152	0.324	0.095	0.171	0.114	0.171	0.628	0.114	0.209
0.133	0.133	0.095	0.114	0.095	0.381	0.171	0.152	0.133	0.095
0.152	0.324	0.267	0.171	0.152	0.095	0.171	0.114	0.114	0.095
0.133	0.114	0.095	0.114	0.4	0.133	0.171	0.114	0.114	0.114
0.114	0.114	0.133	0.286	0.248	0.229	0.171	0.133	0.343	0.114
0.114	0.19	0.095	0.171	0.133	0.152	0.171	0.229	0.381	0.514
0.267	0.133	0.133	0.114	0.095	0.114	0.171	0.457	0.743	0.152
0.114	0.095	0.114	0.286	0.171	0.114	0.171	0.152	0.495	0.438
0.133	0.133	0.095	0.114	0.095	0.114	0.171	0.152	0.152	0.114
0.4	0.4	0.095	0.171	0.19	0.114	0.171	0.114	0.628	0.438
0.209	0.248	0.19	0.133	0.229	0.095	0.171	0.152	0.229	0.324
0.133	0.095	0.095	0.114	0.095	0.095	0.171	0.095	0.495	0.628
0.229	0.114	0.152	0.114	0.209	0.095	0.171	0.171	0.495	0.286
0.248	0.19	0.114	0.133	0.229	0.095	0.171	0.095	0.114	0.267
0.114	0.114	0.171	0.209	0.267	0.095	0.171	0.133	0.133	0.438
0.171	0.171	0.114	0.209	0.229	0.133	0.19	0.114	0.267	0.171
0.133	0.495	0.133	0.095	0.152	0.095	0.19	0.209	0.095	0.171
0.095	0.133	0.267	0.152	0.286	0.114	0.19	0.209	0.305	0.095
0.133	0.114	0.229	0.114	0.286	0.19	0.19	0.095	0.095	0.324
0.209	0.457	0.114	0.209	0.095	0.171	0.19	0.133	0.476	0.133
0.248	0.419	0.095	0.267	0.286	0.095	0.19	0.628	0.209	0.133
0.133	0.133	0.19	0.114	0.209	0.133	0.19	0.171	0.495	0.152
0.095	0.171	0.114	0.114	0.229	0.095	0.19	0.114	0.133	0.248
0.095	0.095	0.114	0.114	0.552	0.095	0.19	0.533	0.171	0.095
0.114	0.095	0.095	0.095	0.152	0.114	0.19	0.533	0.133	0.686
0.171	0.095	0.114	0.438	0.133	0.133	0.209	0.533	0.267	0.114
0.095	0.095	0.114	0.095	0.209	0.095	0.209	0.209	0.133	0.209
0.171	0.171	0.095	0.095	0.114	0.095	0.209	0.133	0.933	0.114
0.286	0.114	0.229	0.114	0.114	0.095	0.209	0.457	0.114	0.114
0.114	0.114	0.095	0.095	0.114	0.133	0.209	0.114	0.419	0.628
0.095	0.324	0.19	0.095	0.248	0.114	0.209	0.533	0.533	0.152
0.095	0.133	0.248	0.171	0.248	0.095	0.209	0.133	0.133	0.152
0.286	0.095	0.095	0.171	0.095	0.095	0.209	0.133	0.533	0.152
0.19	0.114	0.095	0.248	0.324	0.133	0.209	0.095	0.495	0.114
0.133	0.114	0.114	0.209	0.133	0.114	0.209	0.171	0.095	0.267
0.133	0.133	0.438	0.133	0.171	0.133	0.209	0.171	0.114	0.495
0.152	0.095	0.152	0.19	0.267	0.095	0.209	0.381	0.133	0.152
0.095	0.095	0.19	0.152	0.133	0.095	0.209	0.19	0.343	0.095
0.095	0.095	0.114	0.095	0.114	0.114	0.209	0.152	0.209	0.209
0.095	0.209	0.324	0.343	0.133	0.095	0.209	0.152	0.533	0.438
0.095	0.552	0.095	0.209	0.095	0.095	0.209	0.171	0.133	0.095
0.248	0.095	0.114	0.133	0.114	0.095	0.209	0.095	0.114	0.381
0.305	0.362	0.209	0.114	0.152	0.114	0.209	0.171	0.114	0.133
0.19	0.171	0.095	0.152	0.305	0.095	0.209	0.419	0.152	0.114
0.152	0.152	0.114	0.133	0.324	0.133	0.209	0.171	0.514	0.19
0.152	0.133	0.171	0.114	0.114	0.095	0.209	0.171	0.209	0.324
0.114	0.171	0.381	0.19	0.114	0.133	0.209	0.095	0.171	0.152
0.114	0.4	0.209	0.229	0.095	0.114	0.229	0.114	0.533	0.095
0.095	0.248	0.095	0.133	0.133	0.19	0.229	0.286	0.114	0.114
0.095	0.095	0.114	0.419	0.171	0.114	0.229	0.457	0.229	0.533
0.114	0.171	0.171	0.095	0.419	0.171	0.229	0.457	0.381	0.286
0.248	0.362	0.152	0.19	0.095	0.133	0.229	0.114	0.267	0.324
0.209	0.305	0.152	0.133	0.114	0.152	0.229	0.133	0.133	0.114
0.152	0.171	0.095	0.343	0.133	0.114	0.229	0.114	0.114	0.324
0.229	0.114	0.362	0.133	0.209	0.133	0.229	0.152	0.895	0.857
0.095	0.095	0.152	0.571	0.095	0.133	0.229	0.495	0.628	0.209
0.095	0.343	0.095	0.19	0.209	0.171	0.229	0.114	0.171	0.305
0.19	0.133	0.133	0.114	0.095	0.133	0.229	0.209	0.114	0.095
0.133	0.152	0.114	0.438	0.114	0.095	0.229	0.495	0.114	0.133
0.171	0.533	0.095	0.209	0.133	0.095	0.229	0.152	0.343	0.457
0.171	0.114	0.114	0.114	0.114	0.152	0.229	0.457	0.495	0.171
0.152	0.114	0.133	0.209	0.324	0.114	0.229	0.19	0.229	0.114
0.514	0.248	0.095	0.19	0.133	0.095	0.229	0.095	0.133	0.171
0.362	0.095	0.286	0.286	0.095	0.171	0.229	0.286	0.114	0.628
0.152	0.209	0.229	0.133	0.095	0.152	0.229	0.133	0.171	0.59
0.552	0.171	0.152	0.4	0.133	0.095	0.229	0.171	0.857	0.095
0.133	0.19	0.362	0.248	0.152	0.095	0.248	0.248	0.628	0.4
0.095	0.209	0.438	0.095	0.209	0.095	0.248	0.114	0.381	0.152
0.095	0.171	0.095	0.152	0.095	0.133	0.248	0.152	0.114	0.133
0.114	0.19	0.248	0.305	0.114	0.095	0.248	0.171	0.229	0.114
0.133	0.095	0.457	0.114	0.095	0.095	0.248	0.114	0.533	0.152
0.095	0.095	0.095	0.095	0.209	0.114	0.248	0.114	0.838	0.095
0.095	0.324	0.114	0.095	0.095	0.133	0.248	0.19	0.171	0.209
0.095	0.095	0.114	0.209	0.133	0.152	0.248	0.324	0.495	0.628
0.114	0.209	0.305	0.152	0.152	0.095	0.248	0.133	0.495	0.209
0.267	0.114	0.209	0.095	0.095	0.114	0.248	0.152	0.248	0.229
0.095	0.209	0.152	0.171	0.152	0.114	0.248	0.152	0.171	0.286
0.114	0.248	0.209	0.19	0.19	0.133	0.248	0.286	0.114	0.152
0.209	0.343	0.209	0.248	0.095	0.095	0.248	0.209	0.114	0.133
0.114	0.095	0.209	0.095	0.095	0.095	0.248	0.152	0.267	0.152
0.229	0.267	0.095	0.152	0.095	0.095	0.248	0.114	0.743	0.133
0.133	0.152	0.095	0.152	0.133	0.133	0.248	0.133	0.628	0.248
0.133	0.114	0.514	0.152	0.209	0.095	0.248	0.152	0.133	0.095
0.095	0.171	0.171	0.229	0.095	0.095	0.248	0.838	0.533	0.628
0.171	0.114	0.495	0.114	0.133	0.133	0.267	0.114	0.838	0.4
0.171	0.152	0.095	0.229	0.114	0.095	0.267	0.171	0.324	0.667
0.362	0.095	0.114	0.286	0.095	0.095	0.267	0.114	0.495	0.133
0.095	0.114	0.419	0.095	0.286	0.095	0.267	0.114	0.533	0.095
0.133	0.152	0.4	0.133	0.171	0.095	0.267	0.628	0.628	0.133
0.267	0.381	0.495	0.114	0.171	0.114	0.267	0.628	0.114	0.686
0.286	0.495	0.229	0.171	0.343	0.095	0.267	0.628	0.152	0.686
0.229	0.114	0.114	0.133	0.114	0.095	0.267	0.133	0.171	0.286
0.095	0.152	0.324	0.267	0.095	0.095	0.267	0.628	0.838	0.171
0.248	0.19	0.095	0.114	0.095	0.095	0.267	0.114	0.838	0.59
0.362	0.152	0.095	0.133	0.133	0.095	0.267	0.381	0.628	0.267
0.438	0.133	0.133	0.19	0.095	0.095	0.267	0.133	0.114	0.095
0.114	0.114	0.305	0.152	0.095	0.095	0.267	0.457	0.324	0.762
0.095	0.133	0.114	0.495	0.095	0.114	0.267	0.457	0.743	0.267
0.133	0.095	0.362	0.095	0.4	0.114	0.267	0.743	0.114	0.324
0.229	0.095	0.19	0.133	0.095	0.114	0.267	0.133	0.114	0.743
0.095	0.114	0.095	0.133	0.114	0.19	0.267	0.743	0.686	0.743
0.171	0.095	0.209	0.343	0.152	0.171	0.267	0.114	0.171	0.152
0.171	0.152	0.095	0.095	0.114	0.095	0.267	0.743	0.114	0.133
0.324	0.114	0.095	0.095	0.229	0.095	0.267	0.095	0.114	0.114
0.19	0.114	0.133	0.152	0.095	0.095	0.267	0.114	0.152	0.114
0.171	0.114	0.095	0.095	0.095	0.114	0.286	0.095	0.114	0.095
0.171	0.114	0.19	0.095	0.19	0.095	0.286	0.095	0.133	0.324
0.267	0.114	0.152	0.476	0.114	0.095	0.286	0.114	0.095	0.647
0.095	0.095	0.19	0.133	0.114	0.095	0.286	0.095	0.114	0.229
0.095	0.114	0.133	0.095	0.114	0.114	0.286	0.095	0.171	0.324
0.495	0.095	0.095	0.133	0.152	0.095	0.286	0.095	0.095	0.229
0.095	0.095	0.095	0.19	0.114	0.114	0.286	0.133	0.19	0.248
0.133	0.095	0.114	0.114	0.152	0.095	0.286	0.438	0.152	0.305
0.571	0.152	0.114	0.114	0.229	0.095	0.286	0.095	0.133	0.133
0.095	0.19	0.229	0.114	0.19	0.095	0.286	0.686	0.114	0.152
0.229	0.381	0.095	0.152	0.114	0.152	0.286	0.095	0.114	0.438
0.133	0.114	0.19	0.267	0.152	0.133	0.286	0.171	0.171	0.133
0.095	0.095	0.133	0.267	0.152	0.095	0.286	0.114	0.152	0.686
0.095	0.095	0.095	0.152	0.171	0.095	0.286	0.095	0.114	0.4
0.133	0.381	0.114	0.267	0.095	0.095	0.286	0.838	0.133	0.59
0.438	0.533	0.114	0.229	0.095	0.095	0.286	0.133	0.533	0.571
0.114	0.114	0.229	0.095	0.152	0.095	0.305	0.381	0.209	0.686
0.095	0.324	0.152	0.095	0.095	0.095	0.305	0.095	0.114	0.305
0.171	0.095	0.248	0.152	0.267	0.19	0.305	0.381	0.838	0.152
0.133	0.267	0.114	0.19	0.114	0.114	0.305	0.095	0.133	0.133
0.305	0.095	0.171	0.229	0.114	0.133	0.305	0.381	0.229	0.095
0.19	0.19	0.114	0.19	0.133	0.095	0.305	0.114	0.171	0.438
0.248	0.095	0.114	0.095	0.114	0.114	0.305	0.095	0.114	0.457
0.229	0.095	0.114	0.095	0.229	0.133	0.305	0.095	0.114	0.095
0.114	0.114	0.171	0.095	0.248	0.095	0.305	0.133	0.133	0.324
0.171	0.133	0.114	0.133	0.133	0.095	0.305	0.438	0.533	0.152
0.095	0.114	0.19	0.152	0.305	0.095	0.305	0.209	0.114	0.095
0.229	0.114	0.476	0.152	0.114	0.133	0.305	0.686	0.152	0.152
0.286	0.133	0.133	0.152	0.209	0.095	0.305	0.133	0.267	0.095
0.209	0.095	0.343	0.152	0.095	0.095	0.305	0.152	0.095	0.324
0.19	0.19	0.229	0.095	0.095	0.095	0.324	0.152	0.838	0.095
0.095	0.114	0.286	0.095	0.267	0.095	0.324	0.095	0.095	0.114
0.533	0.305	0.133	0.095	0.19	0.095	0.324	0.114	0.838	0.152
0.457	0.152	0.095	0.114	0.133	0.095	0.324	0.152	0.152	0.19
0.152	0.324	0.114	0.133	0.171	0.095	0.324	0.133	0.362	0.152
0.133	0.343	0.171	0.152	0.095	0.095	0.324	0.229	0.114	0.324
0.095	0.362	0.152	0.095	0.133	0.095	0.324	0.095	0.248	0.229
0.171	0.114	0.171	0.152	0.267	0.095	0.324	0.381	0.209	0.229
0.095	0.19	0.152	0.114	0.114	0.095	0.324	0.381	0.114	0.286
0.19	0.152	0.114	0.095	0.152	0.095	0.324	0.229	0.114	0.171
0.095	0.133	0.114	0.152	0.19	0.095	0.324	0.114	0.114	0.305
0.114	0.19	0.343	0.114	0.095	0.095	0.324	0.095	0.533	0.438
0.095	0.095	0.171	0.095	0.19	0.095	0.324	0.114	0.171	0.343
0.095	0.095	0.095	0.114	0.209	0.095	0.324	0.133	0.095	0.133
0.114	0.095	0.171	0.152	0.19	0.095	0.324	0.133	0.171	0.229
0.476	0.095	0.095	0.133	0.152	0.095	0.324	0.095	0.114	0.171
0.209	0.095	0.114	0.114	0.133	0.095	0.343	0.114	0.152	0.19
0.095	0.114	0.095	0.114	0.362	0.095	0.343	0.114	0.533	0.133
0.133	0.171	0.19	0.267	0.152	0.095	0.343	0.209	0.114	0.248
0.095	0.229	0.133	0.114	0.19	0.095	0.343	0.095	0.19	0.095
0.229	0.095	0.171	0.114	0.152	0.095	0.343	0.133	0.114	0.133
0.095	0.133	0.095	0.362	0.095	0.095	0.343	0.686	0.095	0.133
0.286	0.114	0.114	0.133	0.286	0.095	0.343	0.095	0.152	0.114
0.152	0.114	0.114	0.133	0.209	0.095	0.343	0.152	0.686	0.209
0.171	0.133	0.133	0.095	0.095	0.095	0.343	0.095	0.686	0.229
0.171	0.286	0.095	0.095	0.133	0.095	0.343	0.209	0.133	0.152
0.133	0.095	0.095	0.114	0.229	0.095	0.362	0.095	0.114	0.114
0.133	0.095	0.133	0.229	0.095	0.114	0.362	0.095	0.152	0.095
0.343	0.095	0.133	0.114	0.19	0.114	0.362	0.114	0.248	0.209
0.114	0.133	0.095	0.095	0.152	0.114	0.362	0.133	0.114	0.743
0.095	0.248	0.095	0.133	0.133	0.114	0.362	0.114	0.743	0.743
0.095	0.095	0.152	0.095	0.095	0.114	0.381	0.743	0.743	0.743
0.133	0.114	0.095	0.095	0.19	0.114	0.381	0.152	0.114	0.114
0.19	0.114	0.152	0.095	0.095	0.114	0.381	0.114	0.495	0.438
0.095	0.209	0.095	0.095	0.171	0.114	0.381	0.095	0.305	0.133
0.133	0.171	0.19	0.095	0.209	0.114	0.381	0.133	0.114	0.114
0.209	0.152	0.152	0.133	0.286	0.114	0.381	0.095	0.114	0.114
0.095	0.171	0.133	0.133	0.152	0.114	0.381	0.686	0.381	0.438
0.381	0.095	0.133	0.19	0.095	0.114	0.4	0.133	0.152	0.209
0.114	0.152	0.171	0.095	0.133	0.114	0.4	0.114	0.114	0.114
0.095	0.267	0.114	0.133	0.248	0.114	0.4	0.533	0.495	0.095
0.381	0.209	0.152	0.095	0.209	0.114	0.4	0.152	0.495	0.152
0.152	0.095	0.114	0.095	0.095	0.114	0.4	0.095	0.152	0.114
0.095	0.133	0.095	0.095	0.133	0.114	0.419	0.095	0.133	0.114
0.095	0.095	0.171	0.229	0.114	0.114	0.419	0.114	0.095	0.133
0.248	0.248	0.152	0.381	0.133	0.114	0.419	0.095	0.095	0.438
0.152	0.133	0.095	0.286	0.114	0.114	0.419	0.381	0.114	0.533
0.114	0.095	0.133	0.152	0.114	0.133	0.419	0.171	0.628	0.095
0.286	0.114	0.095	0.286	0.114	0.133	0.438	0.152	0.171	0.095
0.114	0.114	0.114	0.209	0.133	0.133	0.438	0.095	0.095	0.533
0.419	0.229	0.229	0.114	0.114	0.133	0.457	0.133	0.095	0.209
0.114	0.133	0.114	0.133	0.19	0.133	0.457	0.381	0.114	0.419
0.114	0.114	0.095	0.209	0.114	0.133	0.457	0.095	0.152	0.133
0.114	0.114	0.133	0.171	0.095	0.133	0.457	0.381	0.152	0.152
0.133	0.19	0.171	0.095	0.171	0.133	0.457	0.381	0.171	0.133
0.171	0.114	0.571	0.267	0.19	0.152	0.476	0.381	0.095	0.19
0.171	0.095	0.114	0.133	0.133	0.152	0.476	0.114	0.114	0.095
0.114	0.095	0.209	0.362	0.133	0.152	0.476	0.152	0.533	0.171
0.133	0.305	0.305	0.533	0.171	0.152	0.495	0.533	0.248	0.114
0.419	0.114	0.152	0.114	0.305	0.152	0.495	0.095	0.114	0.381
0.095	0.362	0.095	0.133	0.114	0.152	0.514	0.533	0.838	0.114
0.095	0.19	0.114	0.095	0.133	0.152	0.514	0.533	0.114	0.095
0.171	0.209	0.114	0.248	0.19	0.152	0.552	0.114	0.133	0.095
0.152	0.114	0.095	0.305	0.095	0.152	0.552	0.095	0.838	0.095
0.095	0.171	0.095	0.19	0.19	0.152	0.59	0.133	0.628	0.171
0.229	0.114	0.495	0.267	0.286	0.152	0.59	0.686	0.628	0.133
0.095	0.209	0.324	0.19	0.324	0.152	0.59	0.095	0.19	0.133
0.095	0.114	0.114	0.095	0.095	0.152	0.609	0.171	0.533	0.305
0.114	0.267	0.095	0.114	0.343	0.152	0.609	0.152	0.133	0.095
0.114	0.286	0.133	0.152	0.133	0.171	0.609	0.229	0.152	0.095
0.133	0.4	0.114	0.095	0.095	0.171	0.609	0.152	0.19	0.533
0.114	0.114	0.152	0.152	0.114	0.171	0.628	0.095	0.686	0.152
0.095	0.114	0.152	0.095	0.381	0.171	0.647	0.152	0.686	0.114
0.133	0.286	0.152	0.095	0.095	0.171	0.667	0.628	0.133	0.133
0.114	0.133	0.095	0.114	0.286	0.171	0.705	0.628	0.114	0.152
0.133	0.152	0.095	0.095	0.286	0.171	0.762	0.628	0.095	0.095
0.133	0.095	0.229	0.152	0.133	0.171	0.8	0.114	0.152	0.209
0.114	0.095	0.133	0.133	0.267	0.171	0.876	0.381	0.533	0.095
0.095	0.152	0.114	0.152	0.095	0.171	0.628	0.248	0.381	0.095
0.114	0.476	0.4	0.114	0.095	0.171	0.628	0.209	0.152	0.514
0.209	0.152	0.095	0.267	0.095	0.19	0.628	0.286	0.838	0.533
0.095	0.114	0.362	0.095	0.133	0.19	0.628	0.229	0.286	0.171
0.133	0.19	0.114	0.171	0.152	0.19	0.628	0.133	0.114	0.095
0.133	0.209	0.171	0.114	0.095	0.19	0.628	0.209	0.114	0.152
0.229	0.152	0.19	0.114	0.381	0.19	0.628	0.533	0.171	0.114
0.114	0.133	0.171	0.267	0.19	0.19	0.495	0.533	0.114	0.114
0.171	0.114	0.114	0.133	0.133	0.209	0.495	0.895	0.152	0.324
0.114	0.19	0.171	0.171	0.305	0.209	0.495	0.552	0.152	0.152
0.133	0.286	0.133	0.095	0.171	0.209	0.495	0.267	0.114	0.095
0.4	0.152	0.19	0.19	0.133	0.229	0.495	0.533	0.114	0.209
0.133	0.267	0.152	0.19	0.095	0.229	0.095	0.705	0.171	0.114
0.114	0.171	0.229	0.095	0.095	0.229	0.095	0.248	0.114	0.343
0.267	0.114	0.286	0.095	0.095	0.248	0.095	0.133	0.133	0.114
0.095	0.209	0.095	0.095	0.152	0.248	0.095	0.381	0.152	0.095
0.152	0.152	0.152	0.114	0.095	0.248	0.095	0.476	0.114	0.095
0.152	0.114	0.095	0.095	0.095	0.248	0.095	0.324	0.114	0.114
0.114	0.114	0.133	0.114	0.095	0.248	0.095	0.171	0.095	0.724
0.114	0.114	0.4	0.095	0.133	0.267	0.095	0.171	0.114	0.533
0.209	0.133	0.229	0.133	0.19	0.267	0.095	0.114	0.114	0.114
0.133	0.476	0.495	0.209	0.171	0.305	0.095	0.438	0.152	0.152
0.095	0.171	0.095	0.095	0.267	0.305	0.095	0.171	0.171	0.171
0.114	0.095	0.229	0.133	0.114	0.324	0.095	0.209	0.209	0.495
0.152	0.324	0.19	0.152	0.133	0.324	0.095	0.209	0.495	0.133
0.209	0.095	0.19	0.248	0.152	0.324	0.095	0.171	0.495	0.133
0.133	0.114	0.114	0.286	0.305	0.324	0.114	0.762	0.152	0.267
0.095	0.114	0.171	0.152	0.133	0.324	0.114	0.438	0.133	0.095
0.095	0.095	0.19	0.114	0.19	0.324	0.114	0.343	0.152	0.19
0.209	0.4	0.095	0.495	0.133	0.343	0.114	0.114	0.495	0.095
0.209	0.267	0.286	0.209	0.267	0.343	0.114	0.362	0.095	0.152
0.171	0.114	0.114	0.095	0.381	0.343	0.114	0.419	0.152	0.114
0.114	0.095	0.267	0.114	0.114	0.362	0.114	0.114	0.628	0.152
0.495	0.171	0.362	0.152	0.171	0.362	0.114	0.171	0.229	0.114
0.095	0.171	0.114	0.209	0.457	0.381	0.114	0.419	0.114	0.095
0.286	0.095	0.152	0.152	0.114	0.4	0.114	0.133	0.838	0.095
0.495	0.19	0.514	0.114	0.229	0.419	0.114	0.248	0.152	0.095
0.152	0.171	0.248	0.133	0.114	0.419	0.114	0.229	0.152	0.209
0.095	0.133	0.171	0.229	0.095	0.419	0.114	0.152	0.209	0.133
0.114	0.209	0.133	0.171	0.152	0.457	0.114	0.628	0.495	0.133
0.114	0.152	0.171	0.095	0.152	0.476	0.114	0.762	0.495	0.095
0.248	0.095	0.133	0.095	0.152	0.476	0.114	0.19	0.495	0.114
0.095	0.152	0.171	0.114	0.095	0.495	0.114	0.229	0.114	0.095
0.095	0.152	0.114	0.095	0.152	0.495	0.114	0.305	0.114	0.838
0.229	0.229	0.267	0.324	0.095	0.495	0.114	0.381	0.114	0.838
0.114	0.133	0.19	0.324	0.133	0.514	0.114	0.171	0.628	0.114
0.152	0.133	0.4	0.114	0.114	0.514	0.114	0.838	0.838	0.248
0.152	0.248	0.19	0.267	0.133	0.533	0.114	0.267	0.628	0.267
0.229	0.114	0.19	0.095	0.362	0.571	0.114	0.114	0.095	0.305
0.362	0.114	0.133	0.229	0.229	0.59	0.133	0.171	0.095	0.248
0.114	0.171	0.152	0.324	0.133	0.609	0.133	0.533	0.209	0.229
0.114	0.209	0.267	0.095	0.114	0.628	0.133	0.267	0.095	0.133
0.133	0.133	0.19	0.286	0.209	0.647	0.133	0.324	0.838	0.533
0.095	0.229	0.171	0.248	0.133	0.647	0.133	0.381	0.171	0.171
0.267	0.133	0.114	0.095	0.152	0.724	0.133	0.895	0.19	0.686
0.114	0.095	0.152	0.095	0.152	0.095	0.133	0.229	0.248	0.686
0.114	0.114	0.229	0.152	0.114	0.095	0.133	0.171	0.152	0.095
0.19	0.171	0.114	0.114	0.114	0.095	0.133	0.152	0.152	0.114
0.095	0.095	0.133	0.229	0.248	0.095	0.133	0.495	0.114	0.095
0.171	0.114	0.114	0.095	0.152	0.095	0.133	0.762	0.171	0.133
0.171	0.209	0.114	0.19	0.229	0.095	0.133	0.152	0.114	0.095
0.095	0.133	0.19	0.152	0.152	0.095	0.133	0.133	0.495	0.171
0.171	0.133	0.209	0.114	0.114	0.095	0.133	0.495	0.495	0.114
0.095	0.114	0.095	0.171	0.495	0.095	0.133	0.133	0.495	0.838
0.152	0.152	0.095	0.133	0.457	0.095	0.133	0.209	0.305	0.381
0.114	0.229	0.209	0.114	0.095	0.095	0.133	0.133	0.171	0.114
0.095	0.305	0.114	0.114	0.171	0.095	0.133	0.133	0.095	0.152
0.19	0.095	0.114	0.133	0.152	0.095	0.152	0.781	0.133	0.838
0.133	0.133	0.095	0.305	0.4	0.095	0.152	0.248	0.133	0.095
0.19	0.19	0.133	0.133	0.4	0.095	0.152	0.495	0.133	0.095
0.152	0.152	0.209	0.229	0.152	0.114	0.152	0.4	0.114	0.133
0.171	0.114	0.152	0.095	0.229	0.114	0.152	0.495	0.095	0.133
0.248	0.133	0.095	0.171	0.114	0.114	0.152	0.209	0.133	0.267
0.095	0.152	0.095	0.152	0.133	0.114	0.171	0.419	0.095	0.743
0.552	0.114	0.152	0.209	0.229	0.114	0.171	0.686	0.171	0.743
0.133	0.152	0.19	0.095	0.19	0.114	0.19	0.686	0.171	0.305
0.286	0.114	0.152	0.362	0.095	0.114	0.19	0.609	0.095	0.533
0.152	0.114	0.381	0.19	0.095	0.114	0.209	0.762	0.533	0.267
0.095	0.152	0.114	0.152	0.248	0.133	0.209	0.267	0.133	0.743
0.267	0.152	0.114	0.095	0.095	0.133	0.686	0.152	0.095	0.743
0.286	0.133	0.095	0.209	0.19	0.133	0.686	0.114	0.533	0.133
0.152	0.133	0.209	0.19	0.095	0.133	0.686	0.171	0.152	0.095
0.171	0.114	0.095	0.229	0.152	0.133	0.686	0.19	0.095	0.133
0.248	0.209	0.152	0.152	0.19	0.133	0.686	0.133	0.171	0.095
0.114	0.133	0.114	0.133	0.095	0.133	0.095	0.495	0.114	0.171
0.114	0.305	0.095	0.209	0.095	0.133	0.095	0.171	0.305	0.229
0.229	0.095	0.152	0.381	0.114	0.133	0.095	0.343	0.095	0.324
0.19	0.133	0.095	0.114	0.171	0.133	0.114	0.114	0.495	0.343
0.267	0.209	0.095	0.095	0.133	0.133	0.114	0.152	0.495	0.133
0.324	0.095	0.152	0.133	0.114	0.133	0.114	0.305	0.133	0.133
0.343	0.095	0.095	0.209	0.114	0.133	0.114	0.209	0.114	0.114
0.171	0.419	0.171	0.095	0.171	0.133	0.114	0.209	0.114	0.171
0.095	0.209	0.114	0.171	0.114	0.133	0.114	0.286	0.229	0.114
0.248	0.19	0.152	0.305	0.171	0.133	0.114	0.133	0.628	0.095
0.114	0.095	0.114	0.095	0.095	0.133	0.114	0.495	0.495	0.686
0.133	0.171	0.114	0.267	0.152	0.133	0.114	0.209	0.133	0.495
0.152	0.133	0.267	0.152	0.114	0.133	0.114	0.324	0.095	0.152
0.267	0.114	0.095	0.133	0.095	0.152	0.114	0.229	0.133	0.705
0.095	0.19	0.171	0.152	0.152	0.152	0.114	0.762	0.095	0.762
0.19	0.133	0.095	0.114	0.095	0.152	0.114	0.095	0.152	0.095
0.095	0.171	0.133	0.133	0.438	0.152	0.114	0.248	0.171	0.305
0.324	0.133	0.095	0.229	0.095	0.152	0.114	0.095	0.686	0.838
0.152	0.095	0.133	0.095	0.095	0.171	0.114	0.114	0.095	0.495
0.114	0.133	0.114	0.267	0.171	0.171	0.114	0.152	0.686	0.19
0.152	0.114	0.152	0.152	0.19	0.171	0.114	0.152	0.229	0.305
0.267	0.438	0.133	0.133	0.152	0.171	0.114	0.59	0.838	0.495
0.133	0.171	0.133	0.095	0.095	0.171	0.114	0.495	0.4	0.152
0.133	0.209	0.133	0.152	0.133	0.171	0.133	0.229	0.133	0.743
0.133	0.152	0.305	0.095	0.209	0.171	0.133	0.362	0.114	0.743
0.095	0.248	0.114	0.362	0.171	0.171	0.133	0.114	0.552	0.209
0.095	0.476	0.248	0.114	0.133	0.171	0.133	0.229	0.095	0.743
0.171	0.133	0.095	0.095	0.171	0.171	0.133	0.133	0.095	0.762
0.19	0.095	0.095	0.267	0.133	0.19	0.133	0.114	0.133	0.133
0.114	0.133	0.362	0.114	0.171	0.19	0.133	0.133	0.133	0.114
0.248	0.209	0.114	0.209	0.114	0.19	0.133	0.305	0.209	0.343
0.19	0.514	0.095	0.114	0.095	0.19	0.133	0.152	0.209	0.248
0.114	0.171	0.133	0.114	0.457	0.19	0.133	0.381	0.686	0.133
0.19	0.133	0.095	0.095	0.152	0.19	0.133	0.438	0.762	0.133
0.114	0.152	0.343	0.095	0.209	0.209	0.133	0.533	0.171	0.114
0.209	0.171	0.133	0.133	0.152	0.209	0.133	0.305	0.114	0.152
0.152	0.267	0.305	0.114	0.095	0.209	0.133	0.267	0.114	0.171
0.438	0.133	0.305	0.095	0.171	0.209	0.133	0.209	0.686	0.209
0.152	0.514	0.209	0.114	0.152	0.209	0.133	0.152	0.686	0.114
0.152	0.133	0.095	0.114	0.152	0.209	0.152	0.267	0.628	0.133
0.343	0.305	0.4	0.248	0.171	0.209	0.152	0.152	0.171	0.229
0.19	0.267	0.171	0.133	0.152	0.209	0.152	0.686	0.229	0.343
0.171	0.171	0.19	0.229	0.114	0.209	0.152	0.876	0.095	0.248
0.095	0.095	0.286	0.114	0.114	0.229	0.152	0.114	0.114	0.343
0.095	0.324	0.419	0.171	0.095	0.229	0.152	0.171	0.095	0.133
0.267	0.114	0.152	0.171	0.286	0.229	0.152	0.552	0.095	0.705
0.362	0.114	0.095	0.171	0.095	0.229	0.152	0.324	0.133	0.19
0.095	0.133	0.305	0.171	0.381	0.229	0.152	0.495	0.495	0.248
0.133	0.095	0.114	0.248	0.248	0.229	0.152	0.133	0.171	0.229
0.114	0.286	0.114	0.095	0.114	0.229	0.152	0.114	0.171	0.324
0.114	0.209	0.095	0.133	0.095	0.229	0.171	0.114	0.095	0.267
0.095	0.095	0.095	0.4	0.248	0.248	0.171	0.667	0.495	0.152
0.419	0.114	0.19	0.114	0.095	0.248	0.171	0.495	0.495	0.095
0.114	0.114	0.095	0.514	0.209	0.248	0.171	0.686	0.133	0.133
0.114	0.267	0.095	0.095	0.114	0.248	0.171	0.686	0.152	0.171
0.114	0.267	0.229	0.229	0.209	0.267	0.171	0.114	0.095	0.152
0.209	0.152	0.267	0.114	0.133	0.267	0.171	0.171	0.152	0.838
0.095	0.248	0.114	0.248	0.133	0.267	0.171	0.095	0.171	0.248
0.114	0.114	0.495	0.171	0.114	0.267	0.171	0.667	0.095	0.133
0.248	0.095	0.133	0.324	0.095	0.305	0.19	0.114	0.095	0.838
0.267	0.095	0.095	0.362	0.095	0.305	0.19	0.686	0.686	0.114
0.152	0.248	0.152	0.209	0.152	0.305	0.19	0.476	0.114	0.095
0.19	0.305	0.495	0.209	0.095	0.305	0.19	0.095	0.114	0.114
0.209	0.152	0.171	0.133	0.095	0.305	0.19	0.114	0.095	0.324
0.133	0.152	0.229	0.095	0.095	0.324	0.209	0.381	0.114	0.286
0.229	0.248	0.248	0.133	0.171	0.324	0.209	0.133	0.152	0.286
0.152	0.095	0.343	0.248	0.248	0.341	0.209	0.267	0.286	0.838
0.095	0.209	0.095	0.381	0.152	0.343	0.209	0.4	0.209	0.305
0.114	0.324	0.229	0.095	0.095	0.343	0.209	0.209	0.133	0.133
0.171	0.171	0.133	0.152	0.152	0.343	0.209	0.838	0.114	0.248
0.209	0.267	0.171	0.286	0.114	0.343	0.209	0.686	0.686	0.362
0.095	0.133	0.114	0.133	0.152	0.362	0.229	0.114	0.686	0.19
0.095	0.267	0.248	0.095	0.095	0.362	0.229	0.628	0.133	0.419
0.152	0.152	0.133	0.095	0.305	0.362	0.229	0.628	0.133	0.133
0.114	0.324	0.171	0.095	0.095	0.381	0.229	0.171	0.171	0.152
0.095	0.095	0.19	0.095	0.095	0.381	0.229	0.324	0.267	0.114
0.152	0.324	0.286	0.152	0.171	0.381	0.229	0.952	0.209	0.209
0.171	0.133	0.133	0.133	0.133	0.381	0.229	0.533	0.628	0.171
0.152	0.152	0.229	0.343	0.19	0.381	0.248	0.095	0.114	0.209
0.171	0.095	0.095	0.133	0.152	0.4	0.248	0.362	0.838	0.838
0.171	0.267	0.095	0.152	0.152	0.4	0.248	0.248	0.495	0.114
0.095	0.229	0.209	0.114	0.114	0.419	0.248	0.152	0.495	0.114
0.19	0.229	0.133	0.114	0.114	0.419	0.248	0.628	0.152	0.114
0.248	0.209	0.171	0.114	0.267	0.438	0.267	0.628	0.095	0.838
0.095	0.095	0.152	0.095	0.095	0.438	0.305	0.171	0.114	0.152
0.19	0.19	0.114	0.095	0.095	0.438	0.305	0.628	0.133	0.114
0.133	0.114	0.171	0.286	0.095	0.457	0.305	0.171	0.495	0.686
0.171	0.152	0.114	0.267	0.343	0.457	0.305	0.152	0.628	0.686
0.133	0.152	0.114	0.114	0.209	0.457	0.324	0.171	0.495	0.133
0.114	0.114	0.114	0.209	0.171	0.457	0.343	0.133	0.114	0.229
0.095	0.152	0.171	0.267	0.095	0.457	0.343	0.209	0.267	0.152
0.209	0.305	0.133	0.152	0.114	0.476	0.362	0.514	0.686	0.171
0.114	0.171	0.095	0.495	0.095	0.476	0.362	0.4	0.267	0.381
0.229	0.133	0.114	0.095	0.229	0.476	0.381	0.514	0.209	0.133
0.19	0.114	0.133	0.133	0.095	0.495	0.381	0.133	0.114	0.267
0.229	0.19	0.229	0.152	0.19	0.495	0.381	0.171	0.495	0.152
0.133	0.152	0.171	0.095	0.095	0.533	0.381	0.114	0.114	0.095
0.305	0.114	0.229	0.286	0.229	0.552	0.381	0.667	0.495	0.229
0.19	0.133	0.171	0.133	0.19	0.552	0.419	0.095	0.152	0.171
0.114	0.114	0.095	0.133	0.152	0.552	0.419	0.495	0.209	0.152
0.095	0.171	0.114	0.095	0.114	0.552	0.419	0.495	0.495	0.095
0.095	0.114	0.114	0.152	0.095	0.552	0.419	0.705	0.267	0.838
0.248	0.095	0.152	0.095	0.152	0.571	0.438	0.495	0.495	0.838
0.229	0.133	0.114	0.209	0.133	0.609	0.457	0.229	0.133	0.171
0.095	0.095	0.133	0.095	0.095	0.609	0.457	0.419	0.248	0.229
0.095	0.095	0.095	0.286	0.324	0.628	0.495	0.628	0.152	0.381
0.133	0.209	0.229	0.114	0.171	0.647	0.495	0.762	0.628	0.209
0.095	0.152	0.133	0.114	0.095	0.647	0.514	0.152	0.628	0.209
0.114	0.114	0.095	0.152	0.267	0.667	0.514	0.171	0.114	0.495
0.248	0.114	0.19	0.133	0.133	0.667	0.552	0.686	0.114	0.495
0.114	0.095	0.171	0.171	0.095	0.667	0.552	0.438	0.171	0.457
0.267	0.19	0.19	0.171	0.095	0.686	0.552	0.248	0.495	0.114
0.133	0.114	0.19	0.19	0.095	0.838	0.552	0.152	0.495	0.114
0.114	0.133	0.095	0.133	0.133	0.857	0.571	0.438	0.171	0.152
0.171	0.495	0.114	0.267	0.133	0.895	0.724	0.171	0.152	0.362
0.19	0.114	0.114	0.248	0.248	0.895	0.724	0.209	0.152	0.209
0.419	0.133	0.095	0.133	0.095	0.933	0.743	0.343	0.743	0.209
0.095	0.095	0.114	0.095	0.209	0.952	0.762	0.267	0.743	0.286
0.133	0.343	0.114	0.114	0.095	0.971	0.686	0.133	0.133	0.171
0.095	0.152	0.133	0.095	0.152	0.095	0.686	0.209	0.628	0.476
0.571	0.095	0.095	0.114	0.133	0.114	0.686	0.305	0.628	0.305
0.114	0.095	0.095	0.114	0.152	0.133	0.686	0.114	0.628	0.229
0.114	0.133	0.152	0.171	0.324	0.095	0.686	0.552	0.628	0.19
0.095	0.114	0.095	0.095	0.171	0.095	0.686	0.705	0.628	0.267
0.209	0.133	0.209	0.095	0.152	0.095	0.533	0.114	0.628	0.152
0.095	0.114	0.095	0.095	0.114	0.305	0.533	0.171	0.095	0.095
0.114	0.19	0.114	0.152	0.171	0.267	0.533	0.248	0.686	0.095
0.381	0.133	0.114	0.171	0.19	0.114	0.533	0.286	0.686	0.114
0.229	0.095	0.095	0.095	0.095	0.152	0.533	0.209	0.686	0.095
0.248	0.133	0.286	0.133	0.114	0.438	0.533	0.324	0.686	0.095
0.133	0.095	0.114	0.209	0.171	0.095	0.533	0.324	0.495	0.133
0.114	0.095	0.114	0.095	0.095	0.114	0.095	0.438	0.495	0.838
0.248	0.095	0.114	0.19	0.19	0.095	0.095	0.686	0.495	0.114
0.229	0.133	0.19	0.19	0.19	0.171	0.095	0.686	0.495	0.209
0.095	0.095	0.095	0.133	0.114	0.095	0.095	0.133	0.133	0.838
0.324	0.114	0.248	0.571	0.133	0.267	0.095	0.095	0.133	0.114
0.152	0.152	0.095	0.114	0.133	0.419	0.095	0.343	0.133	0.133
0.209	0.305	0.095	0.343	0.19	0.133	0.095	0.095	0.152	0.095
0.114	0.305	0.171	0.171	0.552	0.095	0.095	0.533	0.152	0.267
0.152	0.114	0.171	0.19	0.114	0.095	0.095	0.324	0.152	0.209
0.114	0.114	0.095	0.19	0.114	0.114	0.114	0.324	0.152	0.095
0.133	0.171	0.095	0.133	0.133	0.114	0.114	0.362	0.152	0.114
0.305	0.19	0.19	0.381	0.152	0.171	0.114	0.229	0.152	0.209
0.133	0.133	0.152	0.095	0.19	0.095	0.114	0.286	0.152	0.152
0.362	0.095	0.133	0.152	0.248	0.114	0.114	0.171	0.152	0.209
0.152	0.095	0.095	0.133	0.305	0.381	0.114	0.248	0.152	0.114
0.171	0.114	0.229	0.095	0.114	0.19	0.114	0.171	0.152	0.686
0.133	0.171	0.095	0.343		0.209	0.114	0.362	0.152	0.686
0.362	0.267	0.133	0.286			0.114	0.438	0.152	0.686
0.267	0.114	0.114	0.152			0.114	0.609	0.743	0.114
0.152	0.114	0.133	0.095			0.114	0.686	0.743	0.343
0.095	0.133	0.095	0.095			0.114	0.267	0.628	0.114
0.324	0.114	0.324	0.095			0.114	0.495	0.628	0.571
0.095	0.209	0.095	0.171			0.114	0.267	0.628	0.286
0.114	0.133	0.133	0.095			0.114	0.114	0.171	0.305
0.19	0.248	0.133	0.133			0.114	0.438	0.686	0.095
0.152	0.095	0.114	0.095			0.114	0.229	0.686	0.095
0.152	0.171	0.095	0.095			0.114	0.362	0.686	0.628
0.229	0.19	0.419	0.095			0.114	0.324	0.552	0.628
0.19	0.095	0.095	0.152			0.114	0.438	0.552	0.628
0.095	0.171	0.133	0.171			0.114	0.114	0.628	0.133
0.286	0.362	0.381	0.171			0.114	0.628	0.628	0.305
0.114	0.438	0.133	0.114			0.114	0.152	0.628	0.114
0.114	0.114	0.095	0.114			0.114	0.647	0.743	0.114
0.095	0.267	0.095	0.171			0.114	0.514	0.495	0.686
0.171	0.095	0.209	0.133			0.133	0.438	0.495	0.686
0.324	0.229	0.114	0.095			0.133	0.133	0.495	0.686
0.209	0.133	0.114	0.114			0.133	0.438	0.495	0.686
0.095	0.095	0.114	0.305			0.133	0.133	0.229	0.419
0.095	0.095	0.114	0.286			0.133	0.171	0.229	0.152
0.114	0.267	0.114	0.209			0.133	0.133	0.229	0.209
0.114	0.095	0.19	0.133			0.133	0.686	0.229	0.209
0.152	0.248	0.095	0.095			0.133	0.895	0.229	0.686
0.267	0.133	0.133	0.095			0.133	0.324	0.229	0.686
0.133	0.114	0.152	0.114			0.133	0.628	0.229	0.095
0.133	0.095	0.095	0.114			0.133	0.133	0.229	0.114
0.229	0.114	0.095	0.095			0.133	0.19	0.248	0.133
0.114	0.19	0.229	0.152			0.133	0.152	0.248	0.095
0.095	0.343	0.133	0.114			0.133	0.209	0.248	0.114
0.133	0.095	0.095	0.095			0.133	0.305	0.248	0.686
0.171	0.152	0.381	0.209			0.152	0.457	0.248	0.133
0.095	0.095	0.095	0.114			0.152	0.476	0.248	0.628
0.095	0.133	0.133	0.229			0.152	0.324	0.248	0.628
0.133	0.095	0.133	0.095			0.152	0.171	0.267	0.229
0.095	0.171	0.095	0.209			0.152	0.114	0.267	0.095
0.286	0.209	0.133	0.4			0.152	0.229	0.267	0.133
0.209	0.19	0.114	0.095			0.152	0.152	0.267	0.095
0.095	0.095	0.571	0.152			0.152	0.419	0.267	0.229
0.171	0.324	0.114	0.095			0.152	0.4	0.286	0.743
0.095	0.133	0.19	0.095			0.152	0.152	0.286	0.095
0.114	0.095	0.095	0.4			0.152	0.381	0.286	0.743
0.095	0.095	0.209	0.133			0.152	0.209	0.286	0.114
0.133	0.095	0.305	0.095			0.152	0.248	0.286	0.133
0.152	0.133	0.19	0.152			0.152	0.324	0.305	0.152
0.095	0.114	0.114	0.095			0.152	0.628	0.305	0.286
0.152	0.095	0.095	0.229			0.152	0.152	0.305	0.095
0.209	0.095	0.095	0.133			0.152	0.686	0.305	0.133
0.152	0.133	0.19	0.133			0.171	0.438	0.305	0.095
0.324	0.133	0.114	0.171			0.171	0.114	0.324	0.114
0.114	0.114	0.095	0.114			0.171	0.324	0.324	0.343
0.095	0.133	0.095	0.133			0.171	0.114	0.324	0.686
0.229	0.152	0.133	0.571			0.171	0.324	0.324	0.229
0.152	0.133	0.095	0.114			0.171	0.571	0.324	0.114
0.267	0.095	0.095	0.095			0.171	0.724	0.324	0.133
0.133	0.209	0.095	0.114			0.171	0.438	0.324	0.495
0.114	0.324	0.152	0.152			0.171	0.971	0.343	0.495
0.095	0.343	0.171	0.133			0.171	0.114	0.343	0.209
0.305	0.19	0.095	0.095			0.171	0.552	0.343	0.686
0.114	0.19	0.133	0.114			0.171	0.114	0.343	0.686
0.095	0.133	0.095	0.495			0.171	0.324	0.343	0.114
0.114	0.229	0.114	0.133			0.171	0.419	0.343	0.743
0.133	0.114	0.095	0.095			0.171	0.667	0.362	0.19
0.095	0.095	0.114	0.19			0.171	0.324	0.362	0.19
0.19	0.095	0.095	0.114			0.171	0.762	0.362	0.133
0.133	0.19	0.19	0.095			0.171	0.762	0.362	0.171
0.152	0.095	0.324	0.114			0.171	0.628	0.362	0.152
0.267	0.133	0.114	0.229			0.171	0.133	0.381	0.114
0.095	0.095	0.095	0.248			0.171	0.762	0.4	0.095
0.114	0.152	0.248	0.095			0.171	0.171	0.4	0.209
0.171	0.152	0.114	0.114			0.533	0.419	0.4	0.286
0.171	0.095	0.114	0.19			0.533	0.628	0.4	0.381
0.171	0.095	0.248	0.152			0.533	0.647	0.419	0.152
0.095	0.19	0.095	0.133			0.533	0.476	0.419	0.209
0.171	0.152	0.533	0.095			0.533	0.209	0.419	0.686
0.457	0.095	0.324	0.133			0.19	0.628	0.438	0.686
0.19	0.114	0.19	0.095			0.19	0.514	0.438	0.495
0.095	0.114	0.248	0.114			0.19	0.819	0.457	0.114
0.133	0.209	0.209	0.095			0.19	0.686	0.457	0.495
0.209	0.114	0.19	0.209			0.209	0.229	0.476	0.133
0.114	0.095	0.114	0.286			0.209	0.476	0.476	0.457
0.152	0.114	0.152	0.267			0.209	0.152	0.476	0.171
0.4	0.19	0.095	0.362			0.209	0.628	0.495	0.495
0.152	0.095	0.171	0.133			0.209	0.267	0.514	0.495
0.095	0.229	0.095	0.133			0.209	0.724	0.514	0.495
0.095	0.095	0.095	0.171			0.209	0.152	0.514	0.095
0.19	0.114	0.248	0.114			0.209	0.686	0.514	0.114
0.114	0.095	0.095	0.114			0.209	0.686	0.514	0.686
0.19	0.095	0.114	0.171			0.209	0.686	0.533	0.686
0.095	0.114	0.114	0.095			0.229	0.114	0.533	0.533
0.095	0.571	0.095	0.114			0.229	0.209	0.533	0.533
0.095	0.133	0.152	0.171			0.229	0.133	0.533	0.743
0.114	0.305	0.133	0.171			0.229	0.114	0.533	0.095
0.209	0.362	0.171	0.114			0.229	0.152	0.552	0.743
0.19	0.095	0.095	0.209			0.229	0.628	0.552	0.114
0.286	0.286	0.133	0.095			0.229	0.209	0.552	0.628
0.248	0.114	0.133	0.229			0.229	0.762	0.552	0.095
0.248	0.095	0.095	0.152			0.229	0.762	0.571	0.133
0.343	0.114	0.095	0.095			0.248	0.133	0.571	0.305
0.133	0.133	0.133	0.095			0.248	0.152	0.59	0.095
0.133	0.095	0.114	0.438			0.248	0.438	0.59	0.133
0.095	0.171	0.209	0.248			0.248	0.114	0.59	0.133
0.095	0.324	0.095	0.133			0.248	0.152	0.59	0.743
0.095	0.286	0.133	0.171			0.248	0.133	0.59	0.495
0.19	0.095	0.133	0.095			0.248	0.095	0.628	0.19
0.095	0.19	0.114	0.133			0.248	0.114	0.628	0.095
0.114	0.152	0.19	0.095			0.267	0.324	0.628	0.114
0.171	0.152	0.209	0.133			0.267	0.209	0.628	0.133
0.229	0.229	0.19	0.095			0.267	0.229	0.628	0.095
0.095	0.229	0.095	0.114			0.267	0.095	0.647	0.229
0.095	0.19	0.114	0.095			0.267	0.152	0.647	0.286
0.095	0.248	0.343	0.209			0.267	0.286	0.647	0.152
0.209	0.19	0.476	0.095			0.267	0.438	0.647	0.171
0.095	0.114	0.095	0.286			0.267	0.133	0.647	0.095
0.171	0.133	0.305	0.419			0.267	0.628	0.667	0.133
0.114	0.133	0.209	0.133			0.267	0.248	0.686	0.095
0.095	0.171	0.095	0.133			0.267	0.209	0.686	0.114
0.362	0.095	0.114	0.095			0.267	0.209	0.705	0.095
0.095	0.362	0.457	0.114			0.286	0.095	0.724	0.095
0.362	0.133	0.133	0.19			0.286	0.133	0.743	0.114
0.114	0.229	0.19	0.114			0.286	0.305	0.743	0.095
0.209	0.209	0.133	0.362			0.286	0.209	0.743	0.229
0.114	0.114	0.095	0.286			0.305	0.686	0.743	0.152
0.248	0.171	0.114	0.133			0.305	0.628	0.781	0.229
0.095	0.133	0.095	0.171			0.305	0.114	0.8	0.419
0.095	0.267	0.114				0.305	0.133	0.8	0.743
0.095	0.095	0.19				0.305	0.686	0.819	0.267
0.133	0.305	0.133				0.324	0.362	0.819	0.114
0.114	0.114	0.095				0.324	0.209	0.819	0.133
0.248	0.095	0.171				0.324	0.686	0.819	0.209
0.171	0.133	0.19				0.324	0.686	0.838	0.628
0.209	0.19	0.095				0.343	0.095	0.857	0.133
0.19	0.114	0.095				0.343	0.686	0.857	0.229
0.209	0.095	0.209				0.343	0.819	0.876	0.114
0.095	0.229	0.305				0.362	0.686	0.914	0.152
0.152	0.133	0.095				0.381	0.305	0.743	0.133
0.171	0.114	0.095				0.381	0.114	0.743	0.533
0.171	0.171	0.095				0.381	0.552	0.743	0.152
0.152	0.152	0.305				0.381	0.133	0.762	0.533
0.114	0.457	0.152				0.381	0.552	0.762	0.533
0.095	0.514	0.229				0.4	0.19	0.762	0.248
0.267	0.095	0.324				0.4	0.552	0.209	0.229
0.248	0.171	0.381				0.4	0.286	0.133	0.133
0.229	0.19	0.095				0.4	0.686	0.171	0.095
0.229	0.095	0.095				0.4	0.686	0.248	0.267
0.152	0.133	0.209				0.4	0.686	0.59	0.095
0.324	0.343	0.095				0.419	0.686	0.59	0.095
0.114	0.095					0.419	0.095	0.495	0.114
0.095	0.114					0.419	0.171	0.495	0.133
0.133	0.095					0.438	0.686	0.686	0.152
0.267	0.133					0.438	0.8	0.552	0.762
0.095	0.133					0.457	0.229	0.286	0.229
0.152	0.152					0.476	0.628	0.686	0.229
0.114	0.476					0.495	0.114	0.533	0.209
0.152	0.267					0.495	0.095	0.533	0.914
0.209	0.229					0.495	0.229	0.209	0.933
0.229	0.209					0.514	0.343	0.133	0.114
0.095	0.209					0.514	0.838	0.171	0.114
0.095	0.171					0.552	0.552	0.114	0.152
0.152	0.209					0.552	0.552	0.495	0.743
0.095	0.248					0.59	0.552	0.495	0.743
0.114	0.095					0.647	0.686	0.495	0.114
0.114	0.133					0.647	0.686	0.324	0.152
0.114	0.305					0.667		0.114	0.762
0.095	0.133					0.667		0.248	0.762
0.152	0.095					0.667		0.114	0.762
0.152	0.152					0.686		0.229	0.133
0.229	0.133					0.686		0.114	0.533
0.114	0.495					0.686		0.095	0.533
0.095	0.114					0.686		0.267	0.209
0.229	0.133					0.686		0.152	0.248
0.133	0.419					0.705		0.362	0.209
0.114	0.114					0.724		0.114	0.267
0.095	0.381					0.762		0.114	0.114
0.19	0.229					0.762		0.248	0.628
0.152	0.114					0.762		0.533	0.628
0.095	0.095					0.781		0.267	0.229
0.114	0.095					0.819		0.095	0.838
0.114	0.152					0.819		0.248	0.838
0.095	0.095					0.838		0.324	0.133
0.248	0.152					0.838		0.286	0.152
0.114	0.095					0.838		0.133	0.095
0.095	0.133					0.876		0.133	0.267
0.133	0.133					0.895		0.133	0.248
0.133	0.095					0.895		0.133	0.152
0.133	0.152					0.095		0.114	0.152
0.114	0.095					0.19		0.19	0.533
0.152	0.095					0.171		0.267	0.209
0.095	0.095					0.114		0.267	0.19
0.267	0.095					0.133		0.248	0.229
0.19	0.114					0.114		0.533	0.628
0.19	0.095					0.095		0.229	0.628
0.095	0.095					0.095		0.533	0.533
0.171	0.152					0.095		0.171	0.114
0.095	0.095					0.095		0.838	0.095
0.095	0.152					0.476		0.647	0.152
0.152	0.095					0.095		0.171	0.114
0.209	0.286					0.095		0.171	0.324
0.19	0.095					0.171		0.838	0.248
0.095	0.114					0.152		0.152	0.286
0.133						0.324		0.533	0.438
0.152						0.438		0.248	0.419
0.152						0.209		0.343	0.133
0.095						0.114		0.381	0.114
0.095						0.133		0.209	0.438
0.209						0.152		0.114	0.209
0.209						0.114		0.457	0.171
0.229						0.114		0.133	0.114
0.209						0.209		0.838	0.533
0.267						0.248		0.114	0.533
0.114						0.19		0.133	0.419
0.248						0.324		0.628	0.438
0.095						0.133		0.095	0.438
0.267						0.095		0.343	0.457
0.095						0.133		0.533	0.457
0.095						0.114		0.095	0.495
0.095						0.152		0.133	0.495
0.133						0.095		0.095	0.495
0.095						0.533		0.324	0.514
0.114						0.133		0.552	0.514
0.114						0.114		0.152	0.571
0.095						0.095		0.59	0.59
0.133						0.171		0.229	0.59
0.095						0.114		0.114	0.59
0.095						0.4		0.628	0.628
0.114						0.114		0.324	0.647
0.095						0.229		0.248	0.667
0.4						0.114		0.152	0.686
0.533						0.171		0.133	0.724
0.133						0.114		0.305	0.762
0.114						0.133		0.095	0.857
0.095						0.152		0.171	0.99
0.152						0.209		0.209	0.628
0.152						0.267		0.533	0.628
0.209						0.133		0.419	0.133
0.095						0.095		0.095	0.133
0.133								0.343	0.628
0.152								0.305	0.628
0.133								0.628	0.952
0.114								0.152	0.971
0.152								0.209	0.99
0.286								0.229	0.99
0.095								0.59	0.229
0.133								0.114	0.533
0.419								0.267	0.209
0.114								0.248	0.628
0.209								0.324	0.628
0.114								0.324	0.133
0.095								0.4	0.19
0.095								0.095	0.133
0.152								0.171	0.838
0.381								0.114	0.209
0.095								0.305	0.838
0.114								0.267	0.838
0.095								0.4	0.838
0.171								0.209	0.628
0.152								0.133	0.628
0.152								0.133	0.286
0.133								0.305	0.286
0.324								0.248	0.286
0.19								0.248	0.286
0.229								0.209	0.305
0.19								0.133	0.305
0.133								0.095	0.343
0.133								0.152	0.343
0.114								0.552	0.343
0.229								0.552	0.362
0.095								0.552	0.362
0.095								0.286	0.362
0.152								0.152	0.381
0.114								0.267	0.4
0.133								0.133	0.457
0.381								0.647	0.476
0.419								0.095	0.476
0.171								0.381	0.533
0.095								0.362	0.552
0.095								0.686	0.552
0.324								0.095	0.552
								0.248	0.686
								0.095	0.762
								0.114	0.781
								0.743	0.819
								0.114	0.933
								0.133	0.952
								0.114	0.362
								0.362	0.362
								0.114	0.362
								0.209	0.362
								0.552	0.762
								0.133	0.762
								0.114	0.781
								0.552	0.8
								0.114	0.819
								0.438	0.838
								0.095	0.324
								0.229	0.324
								0.552	0.343
								0.533	0.343
								0.133	0.343
								0.4	0.343
								0.171	0.343
								0.286	0.343
								0.495	0.343
								0.438	0.362
								0.305	0.362
								0.457	0.362
								0.114	0.362
								0.133	0.362
								0.248	0.362
								0.095	0.362
								0.114	0.381
								0.324	0.381
								0.171	0.381
								0.095	0.4
								0.552	0.4
								0.114	0.4
									0.4
									0.4
									0.4
									0.4
									0.419
									0.419
									0.438
									0.438
									0.457
									0.457
									0.495
									0.495
									0.495
									0.514
									0.514
									0.533
									0.533
									0.533
									0.552
									0.552
									0.552
									0.552
									0.552
									0.552
									0.571
									0.571
									0.59
									0.59
									0.609
									0.647
									0.647
									0.667
									0.686
									0.705
									0.724
									0.743
									0.743
									0.762
									0.152
									0.114
									0.209
									0.152
									0.248
