# Supplementary material for: Enhanced single RNA imaging reveals dynamic gene expression in live animals
Source: eLife journal article supplement (doi:10.7554/elife.82178), 2023-03-03

The schematic diagram shows the MCP-8xMS2-24xSuntag-sfGFP construct. It is a linear sequence of genetic elements: a BFP tag (blue box), a 3'UTR (grey box), 8xMS2 binding sites (represented by 8 circles), an MCP tag (pink box), 24xSuntag binding sites (represented by 24 vertical bars), an scFv tag (green box), and an sfGFP tag (green box).

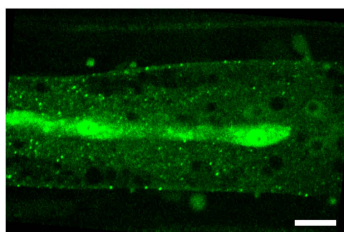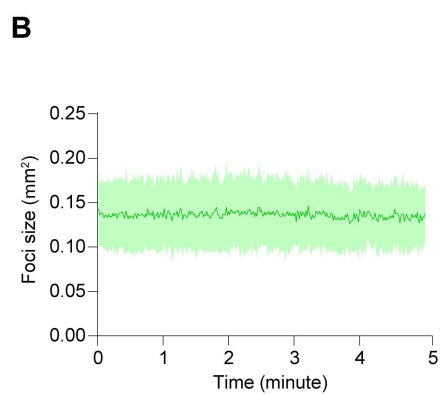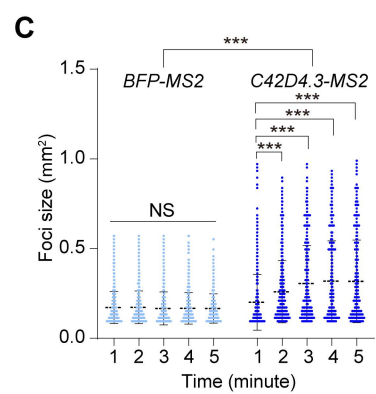

Supplement: supp [file elife-82178-supp-v2.zip]
