# Supplementary figures and images for: Enhanced single RNA imaging reveals dynamic gene expression in live animals
Source: eLife journal article supplement (doi:10.7554/elife.82178), 2023-03-03

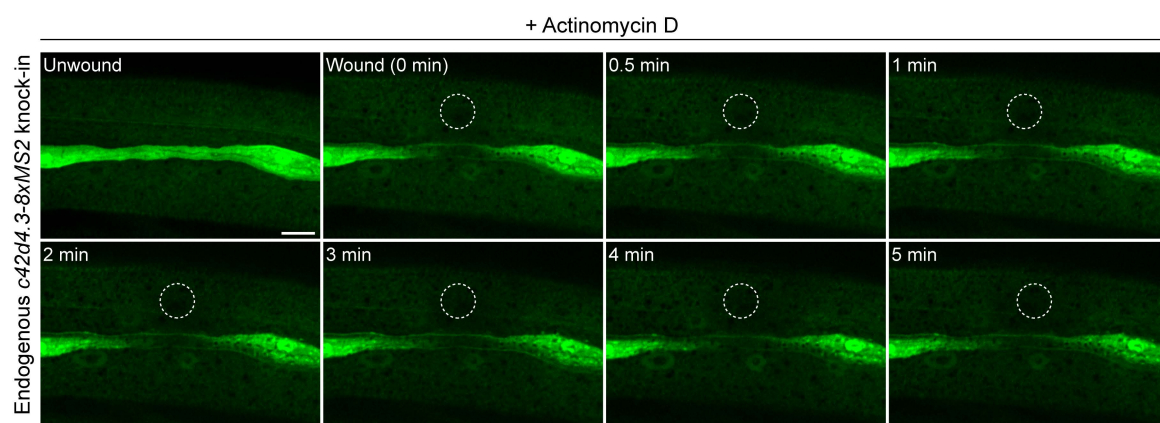

Supplement: supp [file elife-82178-supp-v2.zip]

Controls

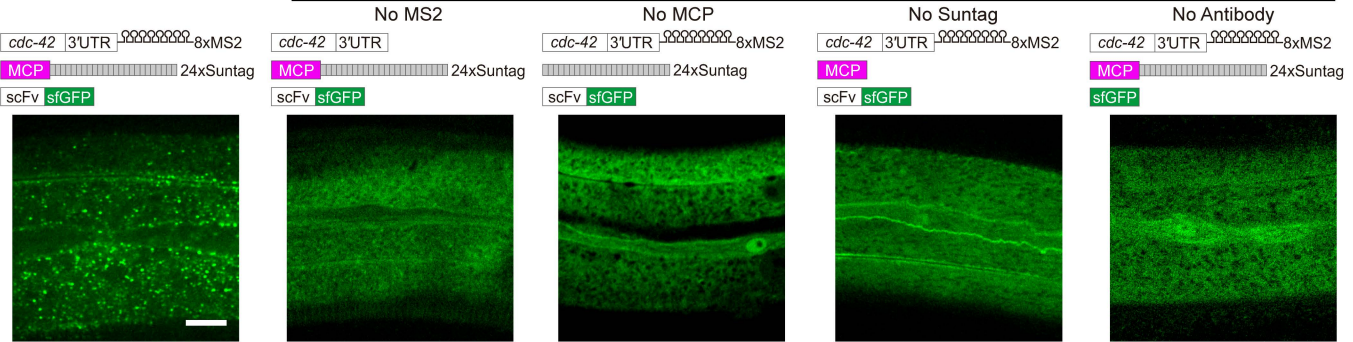

Supplement: supp [file elife-82178-supp-v2.zip]

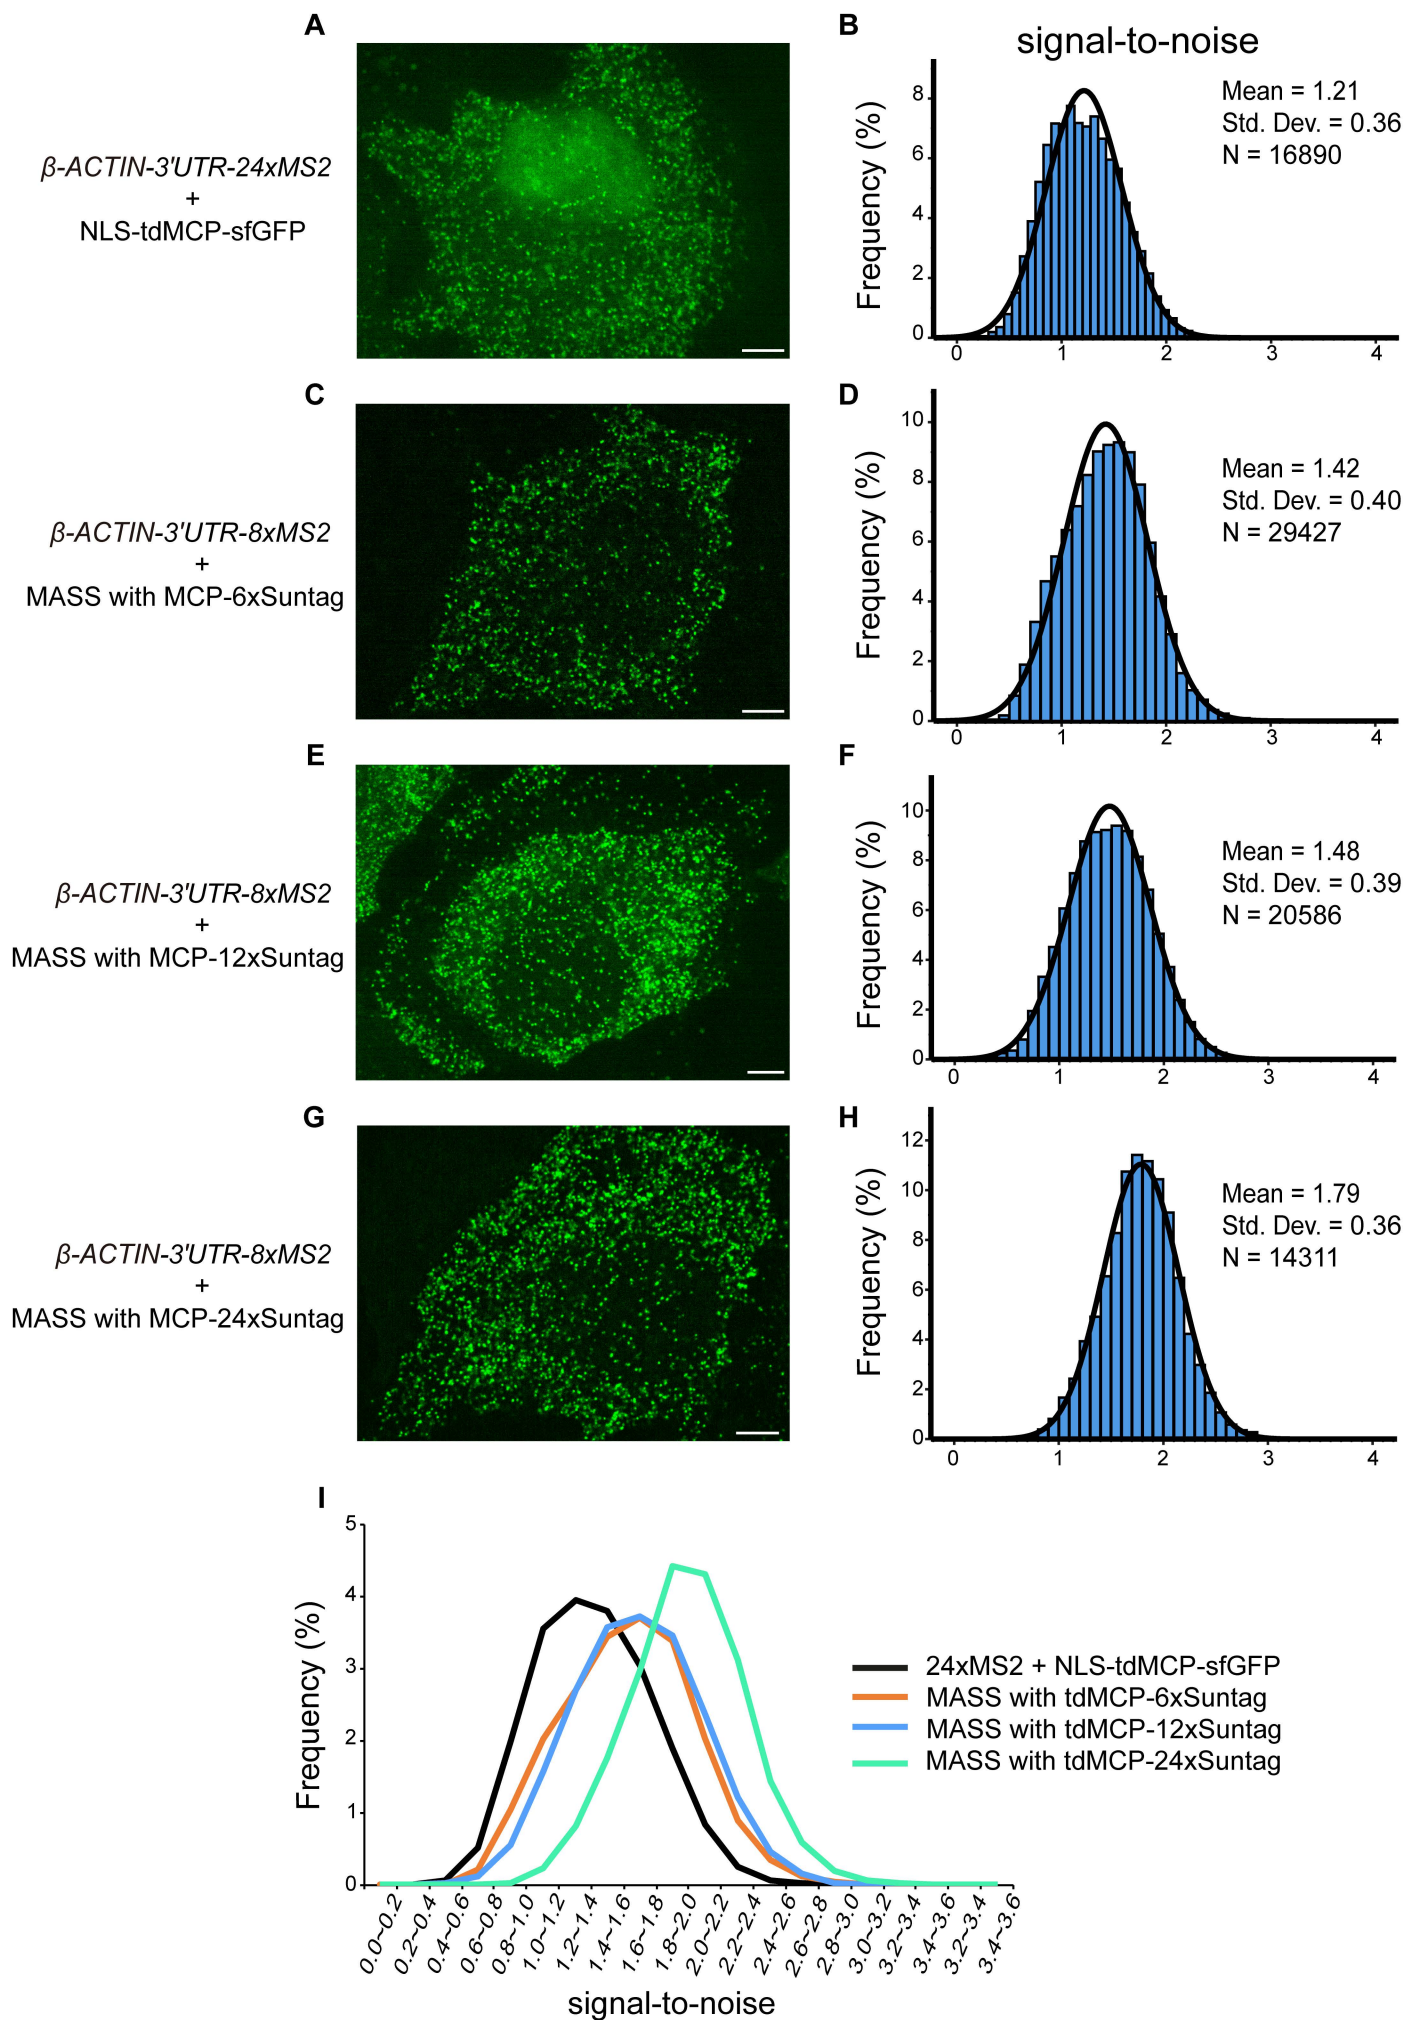

Supplement: supp [file elife-82178-supp-v2.zip]

Endogenous *c42d4.3-8xMS2* knock-in

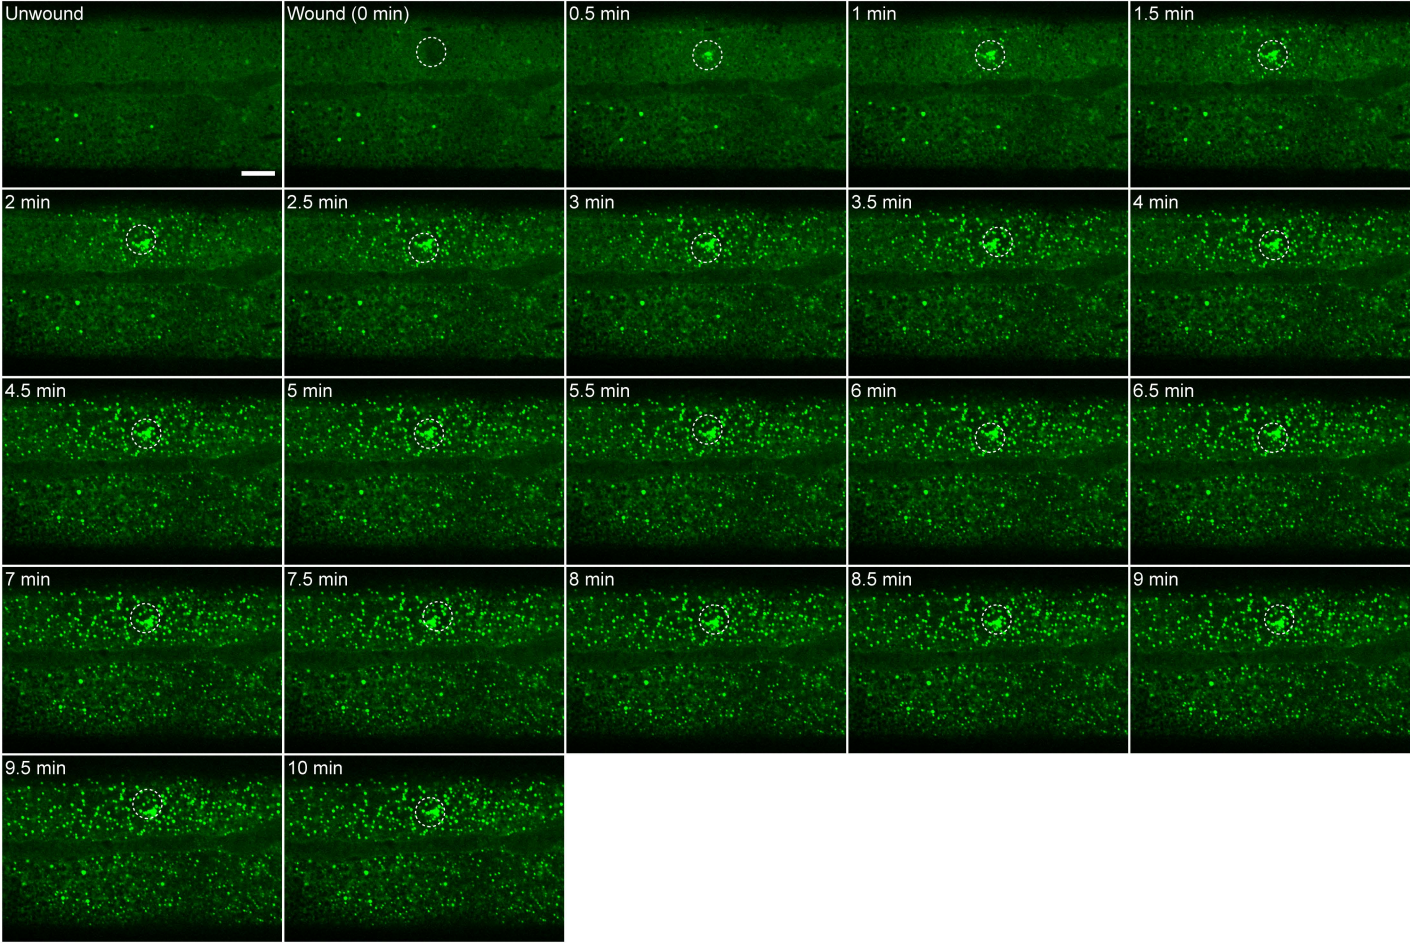

Supplement: supp [file elife-82178-supp-v2.zip]

**A**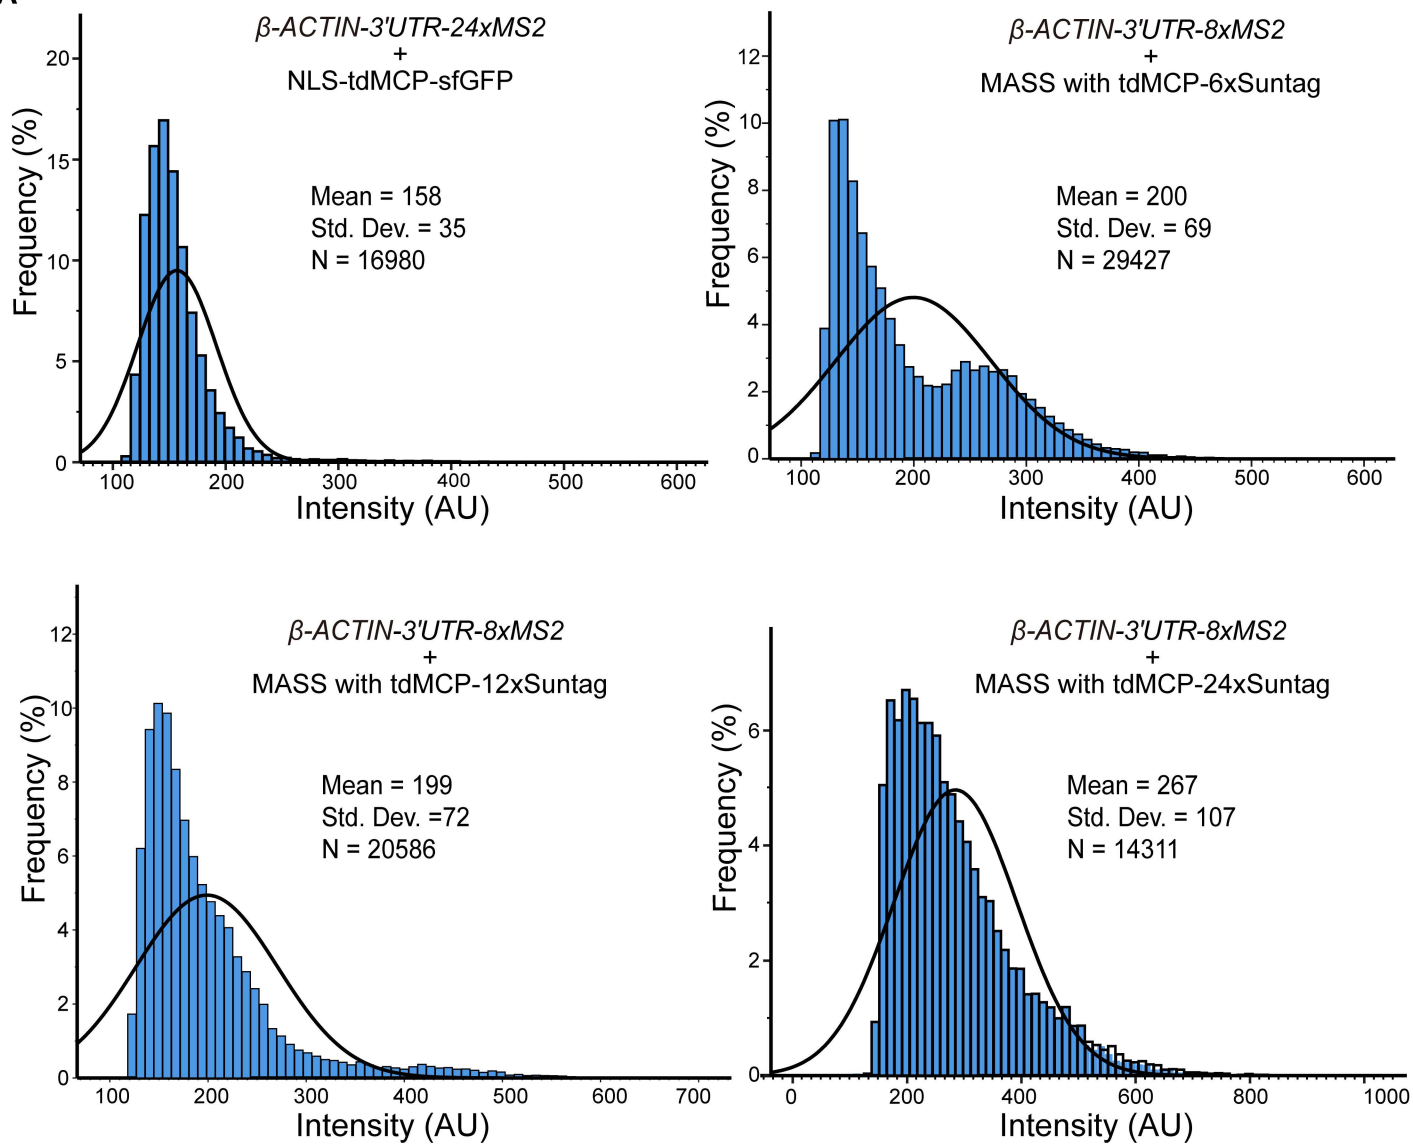**B**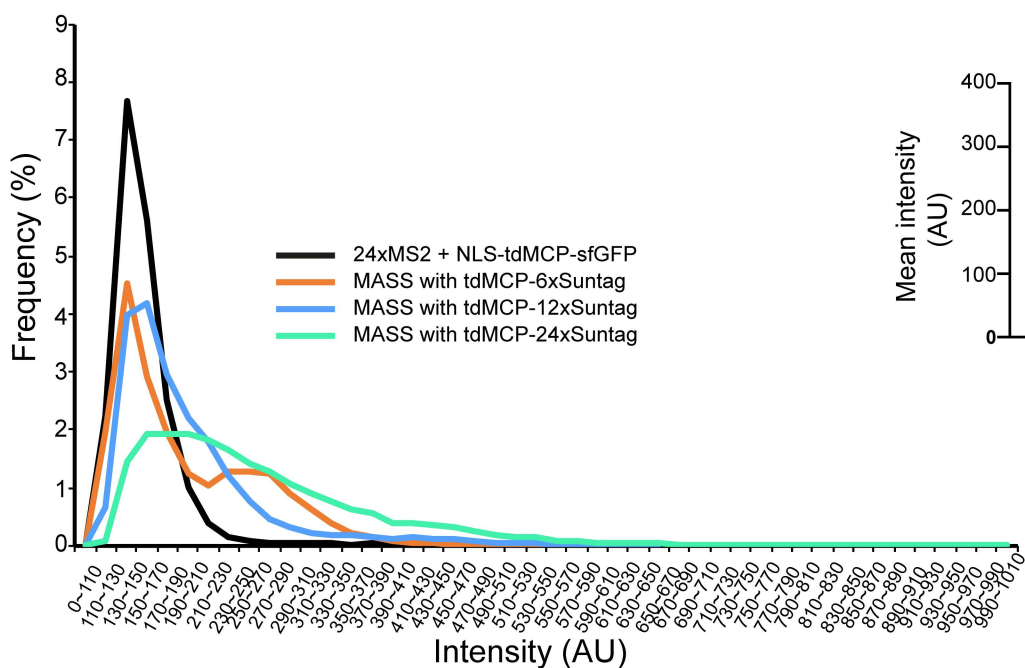**C**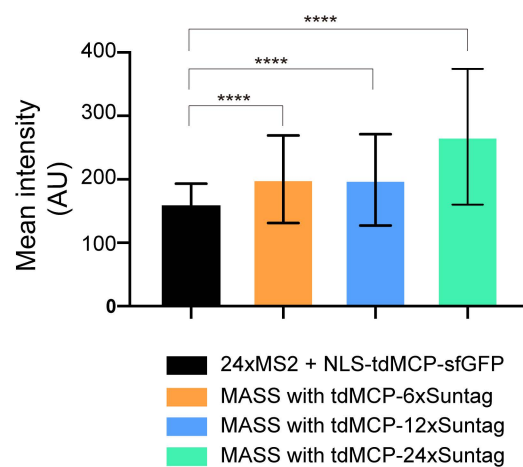

Supplement: supp [file elife-82178-supp-v2.zip]

**A**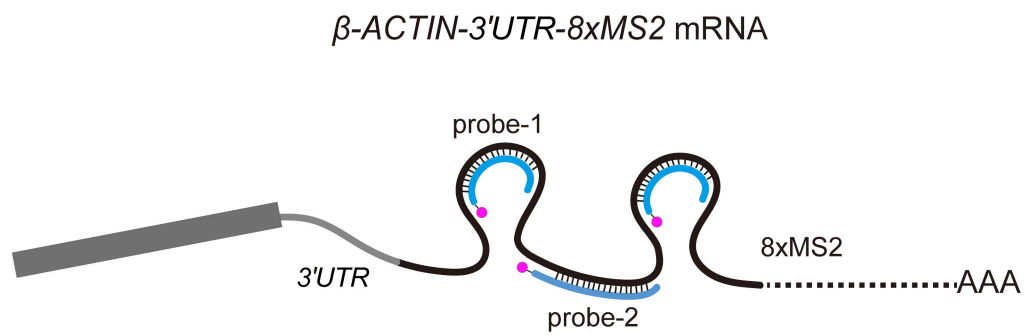**B**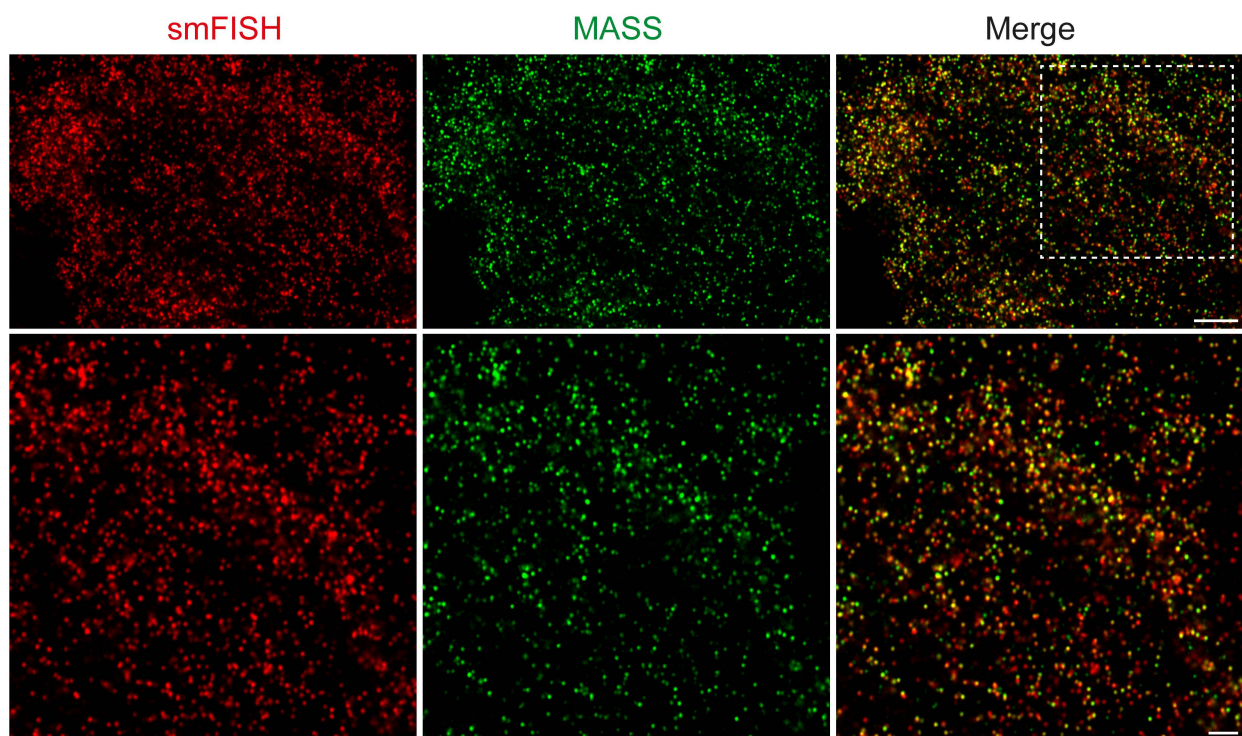**C**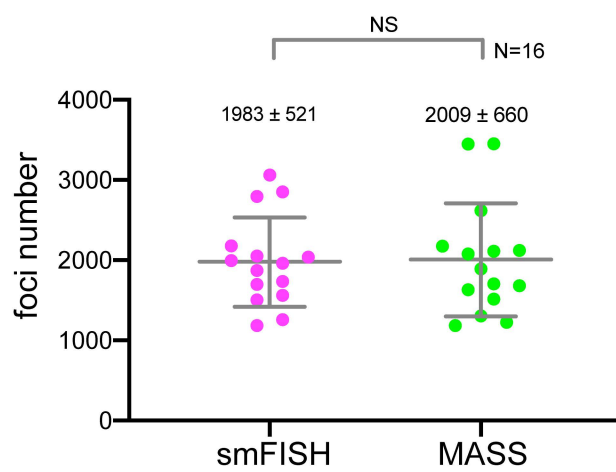

Supplement: supp [file elife-82178-supp-v2.zip]

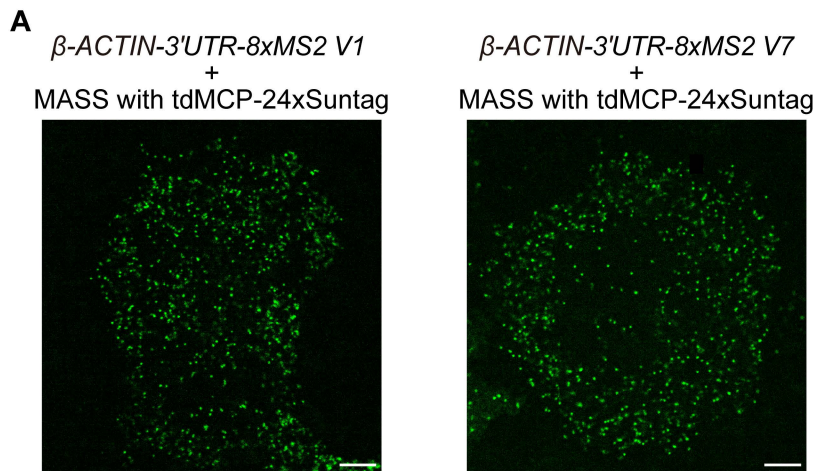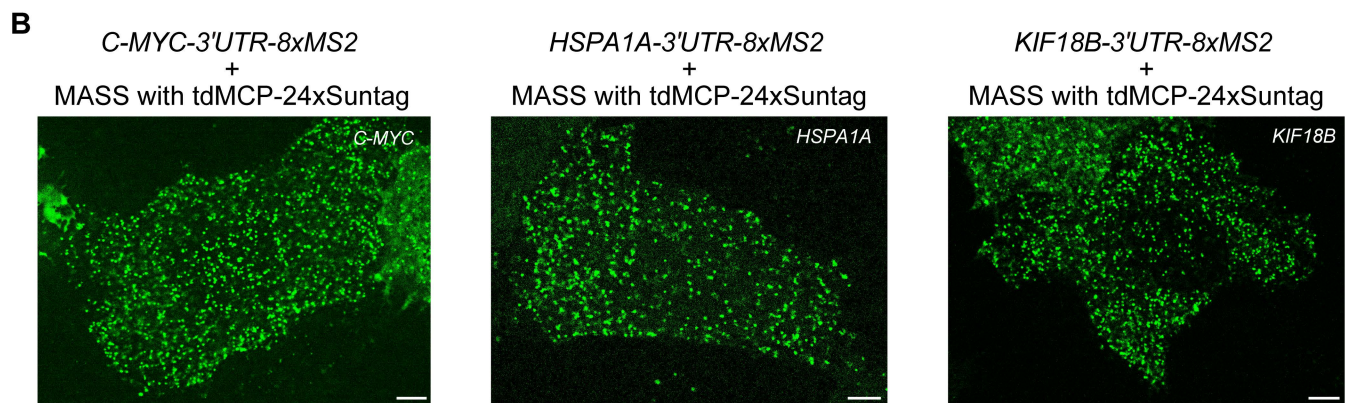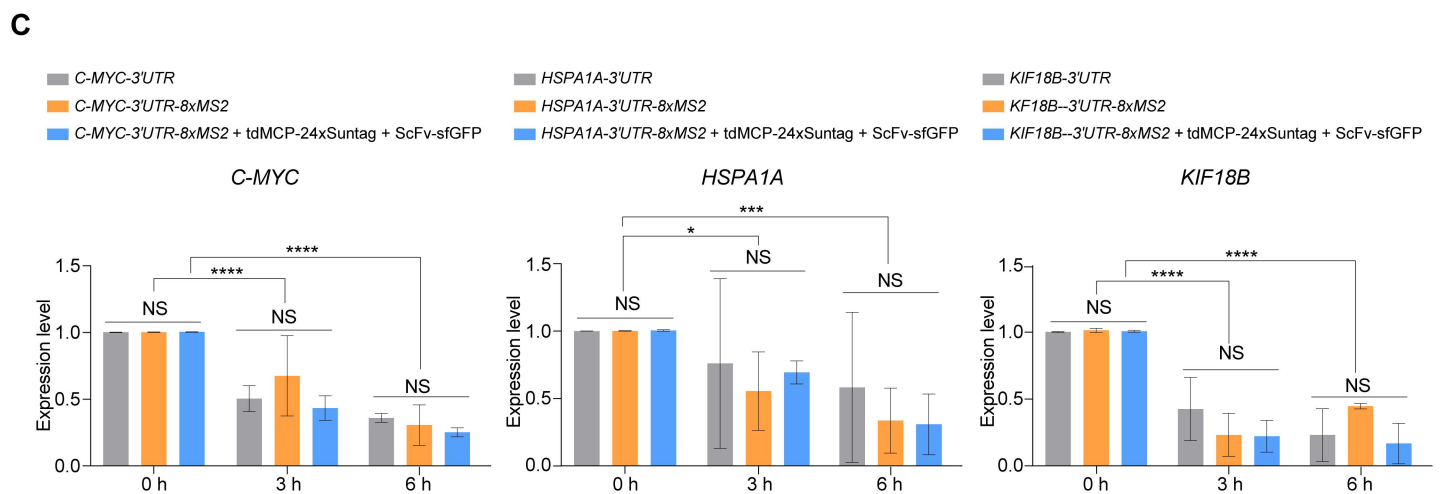

Supplement: supp [file elife-82178-supp-v2.zip]

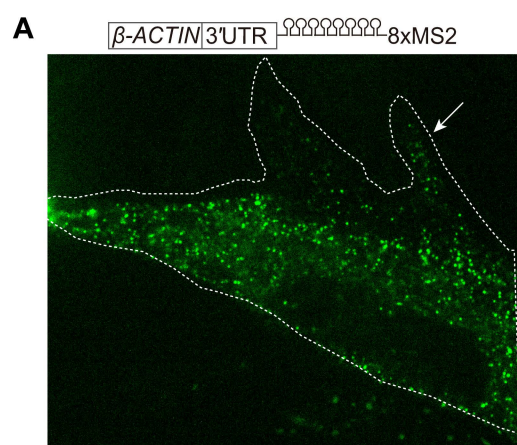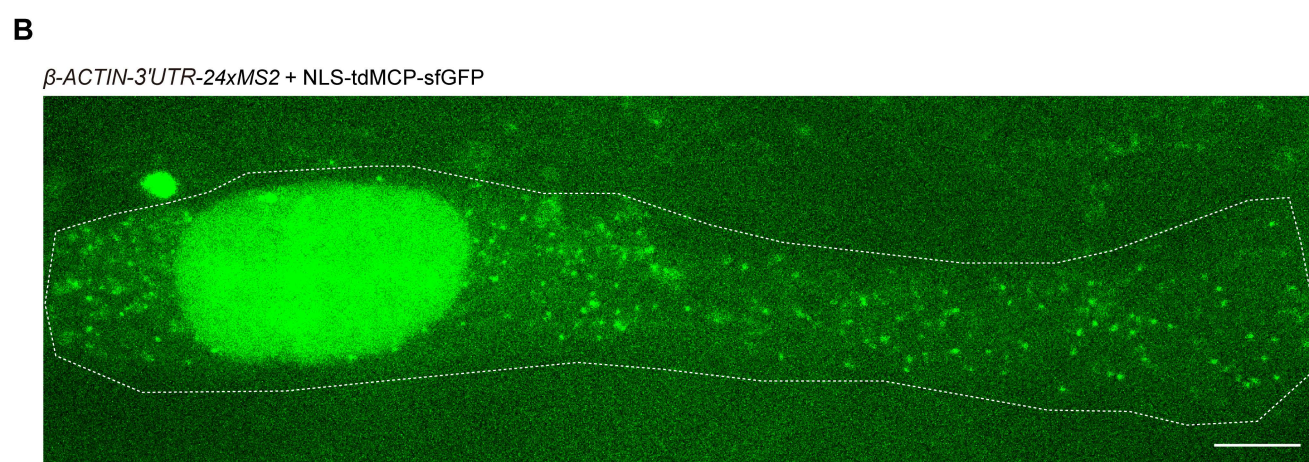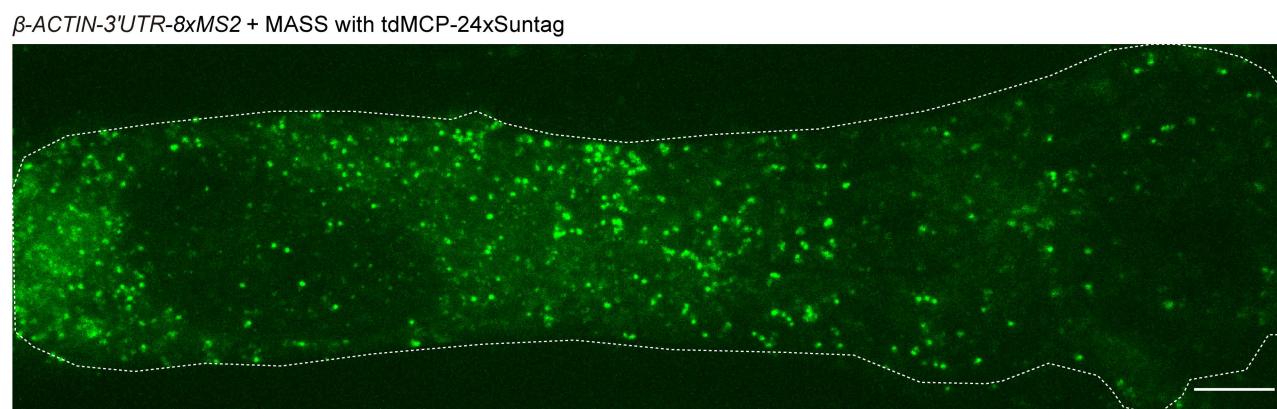

Supplement: supp [file elife-82178-supp-v2.zip]

**A**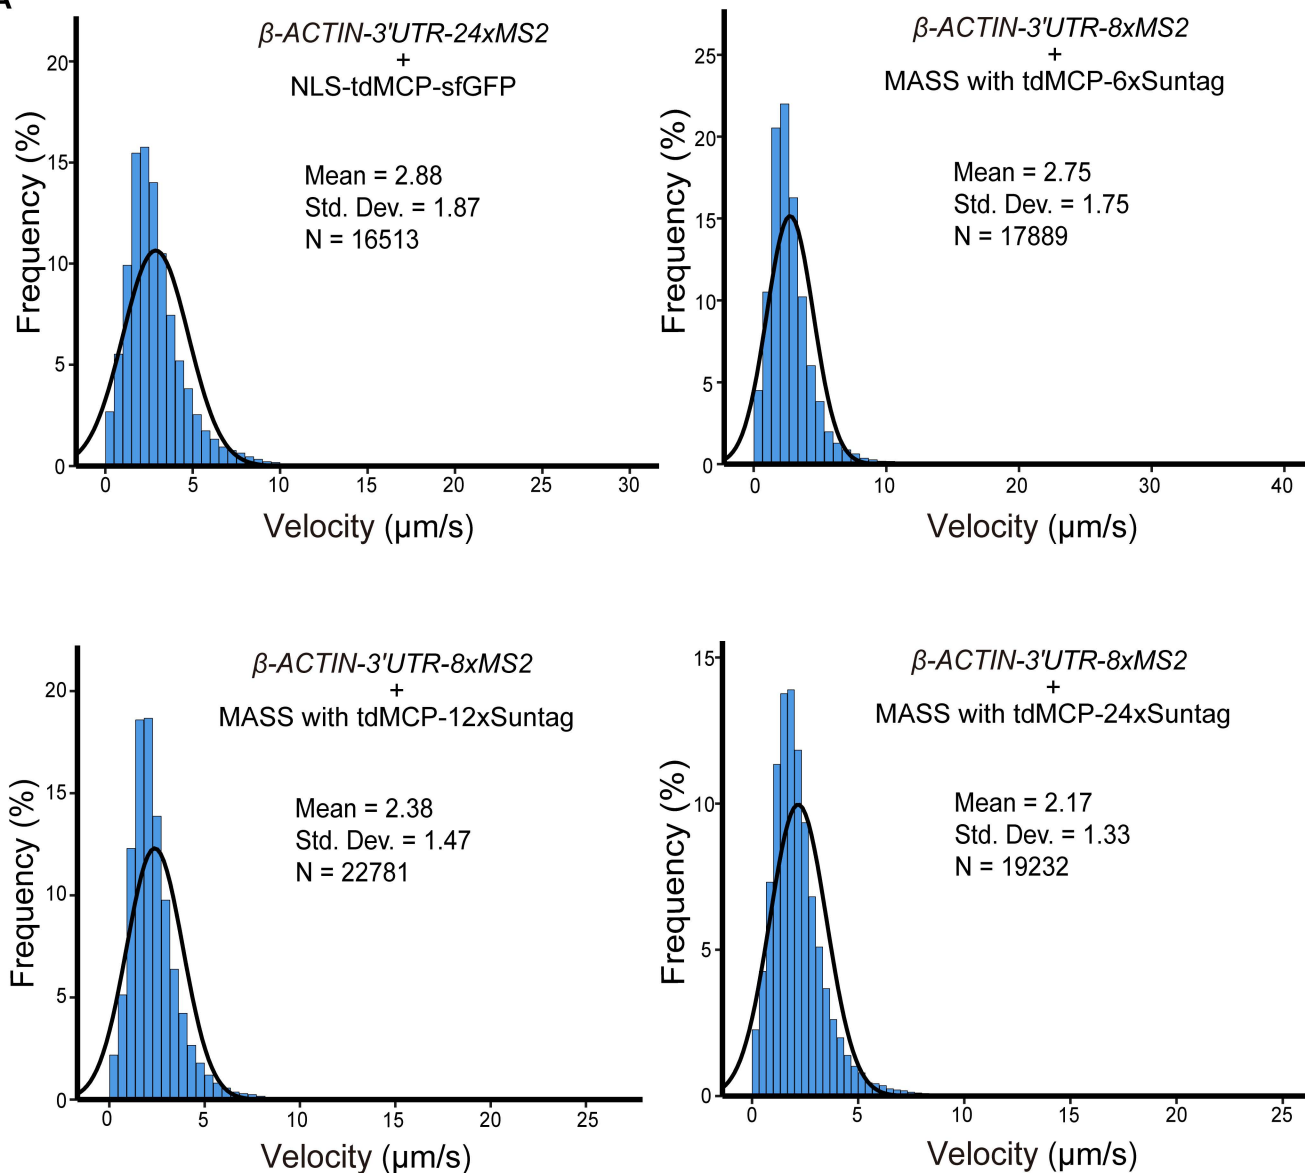**B**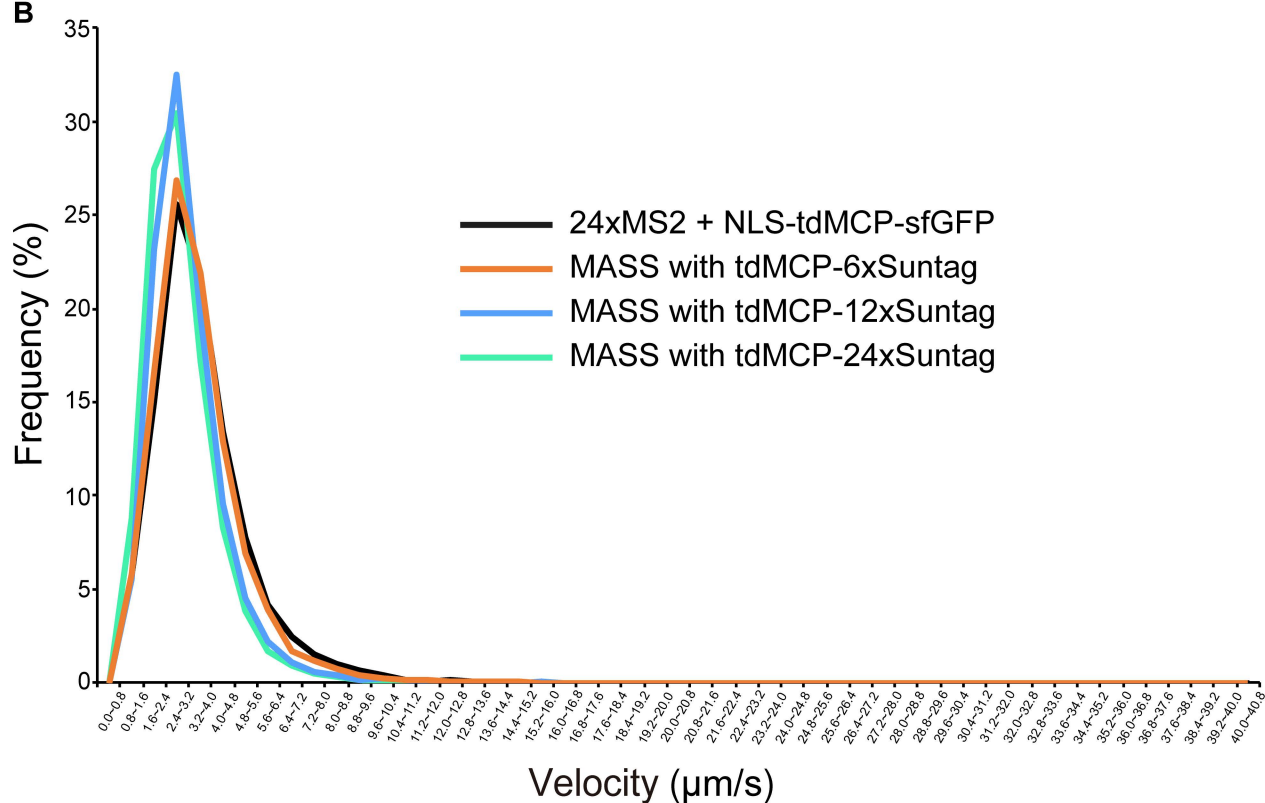

Supplement: supp [file elife-82178-supp-v2.zip]

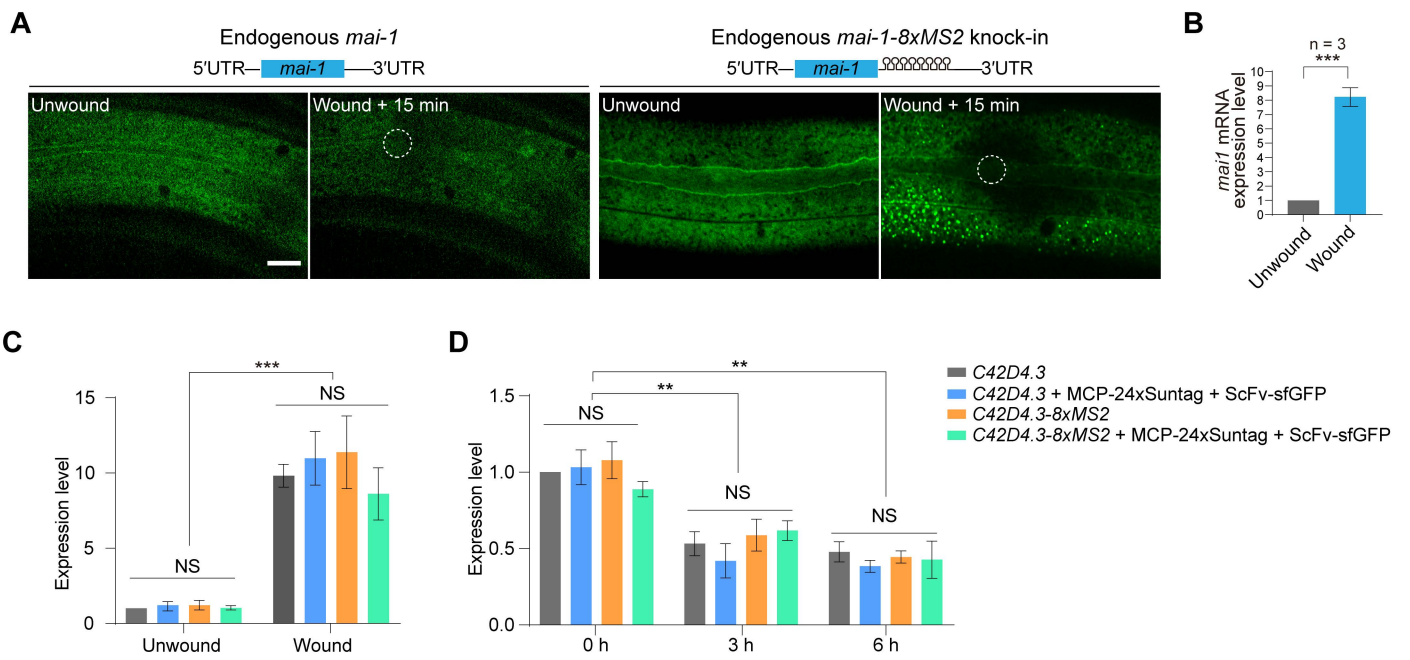

Supplement: supp [file elife-82178-supp-v2.zip]
